# Supplementary material for: An umpolung mechanism of B(pin)-mediated Cu/B rearrangement and origin of regioselectivity for NHC-Cu-catalyzed allylation of imines
Source: Royal Society of Chemistry journal article supplement (doi:10.1039/d3qo00045a), 2023-01-01
Supplement: d3qo00045a1.pdf [file d3qo00045a1.pdf]

**Supporting Information for**  
**An Umpolung Mechanism of B(pin)-**  
**Mediated Cu/B Rearrangement and Origin**  
**of Regioselectivity for NHC-Cu Catalyzed**  
**Selective Allylation of Imine**

*Xinhua Jia<sup>‡</sup>, Qiong Wang\*, Jianbiao Liu, Wenjuan Wang, Chuanzhi Sun, Fang Huang,  
Chong Yang and Dezhan Chen\**

College of Chemistry, Chemical Engineering and Materials Science, Collaborative  
Innovation Center of Functionalized Probes for Chemical Imaging in Universities of  
Shandong, Key Laboratory of Molecular and Nano Probes, Ministry of Education,  
Shandong Provincial Key Laboratory of Clean Production of Fine Chemicals,  
Shandong Normal University, Jinan 250014, P. R. China

\*Corresponding author. Tel.&Fax: +86 531 86180304;

E-mail: [dchen@sdu.edu.cn](mailto:dchen@sdu.edu.cn).

[qiongwang@sdu.edu.cn](mailto:qiongwang@sdu.edu.cn);

## Table of Contents

|                                                            |                |
|------------------------------------------------------------|----------------|
| 1. Figures S1-S5 Results for the other possible paths..... | <b>S3-S8</b>   |
| 2. The tables of EDA calculation results.....              | <b>S9</b>      |
| 3. Cartesian coordinates of all optimized structures.....  | <b>S9-S187</b> |

## 1. Results for the other possible paths

To prove the reliability of our results, we further re-optimize the geometries for the oxidation addition steps using dispersion-corrected functional M06-L (Fig. S2). we further re-optimized the geometries for the oxidation addition steps using M06-L (Figure S2). The energy barriers optimized by M06-L are decreased both for C(sp<sup>2</sup>)-Cu oxidation addition or C(sp<sup>3</sup>)-Cu one and the regioselectivity  $\Delta\Delta G^\ddagger$  decreased by 0.6 kcal/mol. However, no change nearly in structures and there was no effect on the conclusion. In addition, we further re-calculated the single point energies for the oxidation addition steps by using M06-L and def2-TZVP base set for all atoms (Figure S3). According to the calculations, the energy barriers both for C(sp<sup>2</sup>)-Cu oxidation addition or C(sp<sup>3</sup>)-Cu one are increased slightly and little effect on regioselectivity. Therefore, the geometries are not sensitive to changes in base and functional.

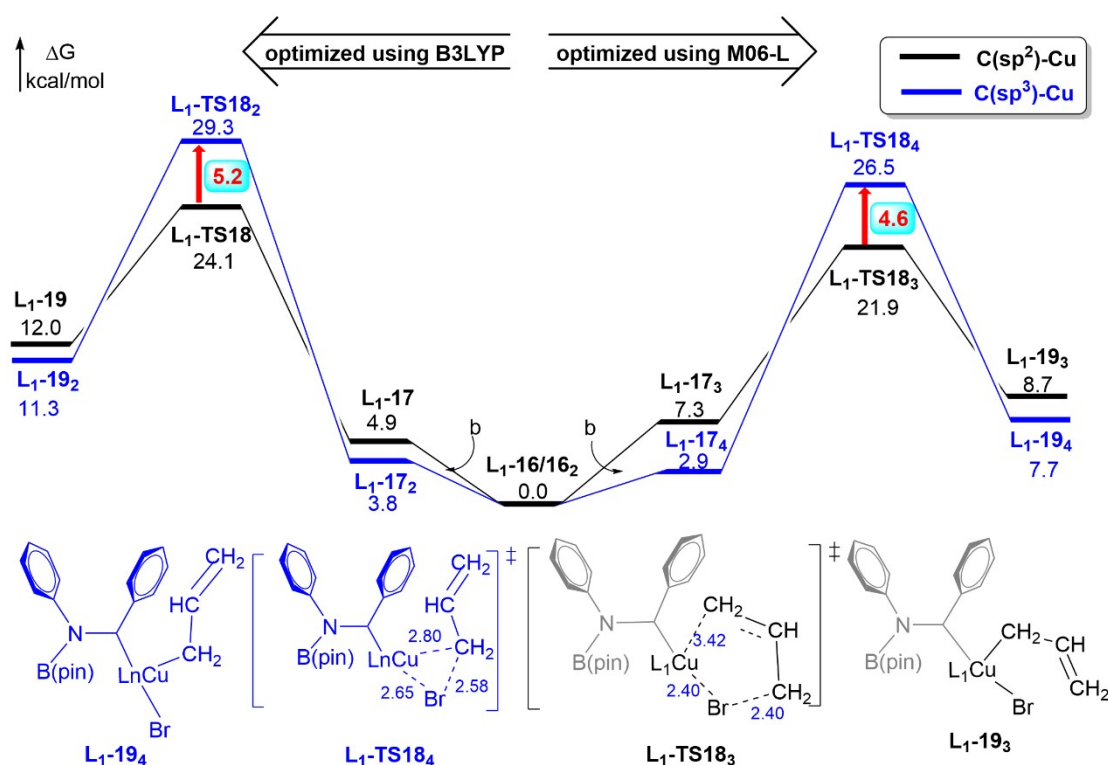

**Fig. S1.** Free energy profile and optimized structures of oxidation addition for L<sub>1</sub>.

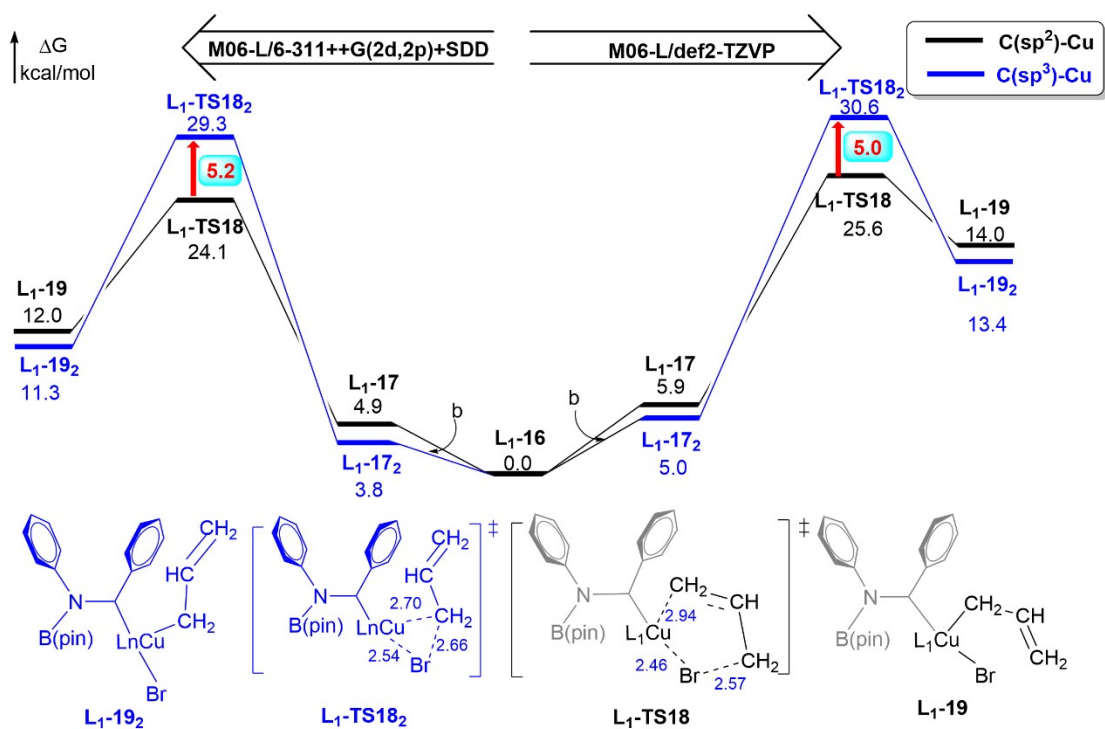

**Fig. S2.** Free energy profile and optimized structures of oxidation addition for  $L_1$ .

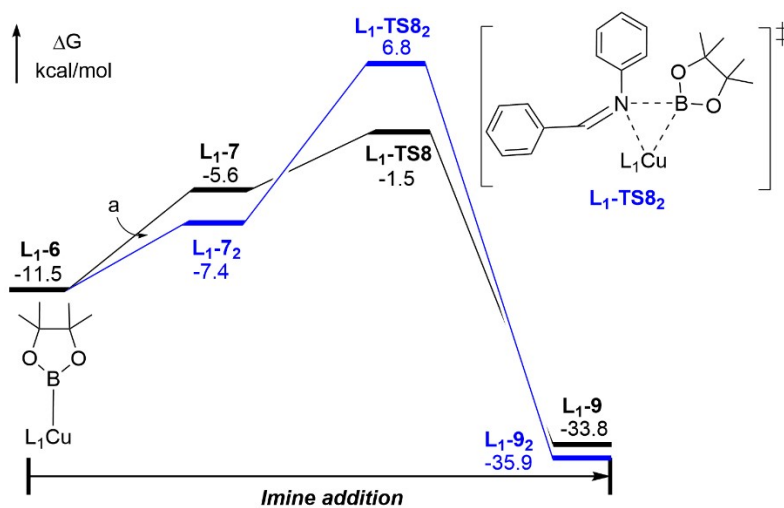

**Fig. S3.** Free energy profile for the generation of  $\alpha$ -borylaminoalkyl copper, along with optimized structures

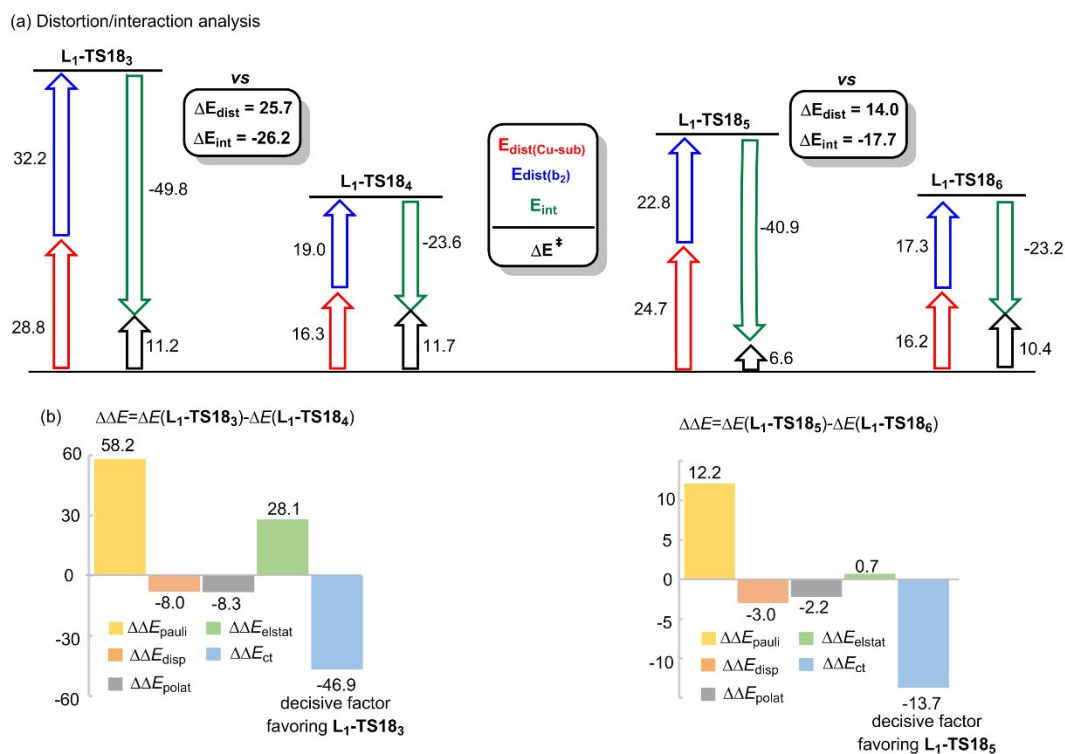

**Fig. S4.** DI and comparison of each energy term analysis for L<sub>1</sub>-TS18<sub>3</sub>, L<sub>1</sub>-TS18<sub>4</sub>, L<sub>1</sub>-TS18<sub>5</sub> and L<sub>1</sub>-TS18<sub>6</sub>.

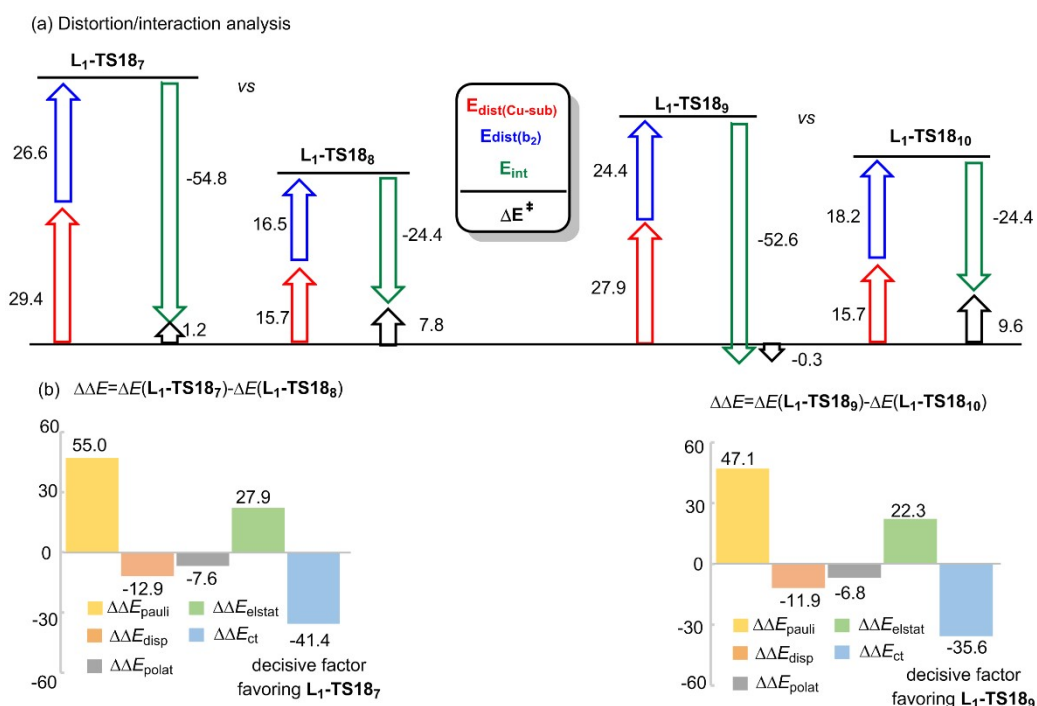

**Fig. S5.** DI and comparison of each energy term analysis for L<sub>1</sub>-TS18<sub>7</sub>, L<sub>1</sub>-TS18<sub>8</sub>, L<sub>1</sub>-TS18<sub>9</sub> and L<sub>1</sub>-TS18<sub>10</sub>.

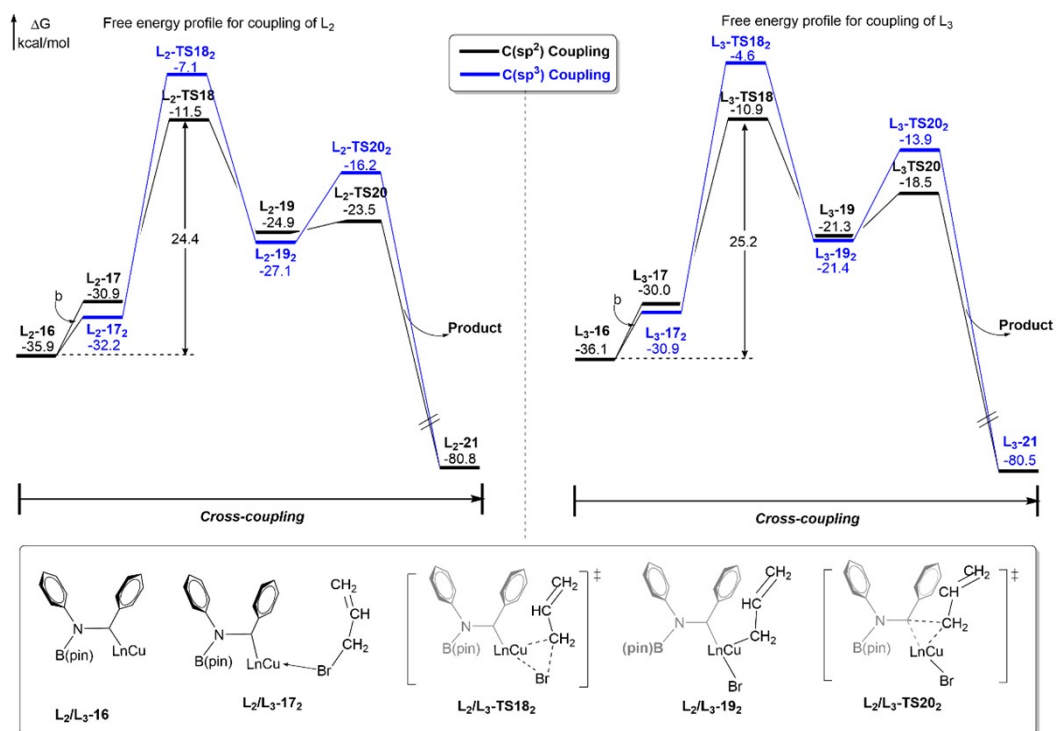

**Fig. S6.** Free energy profile and optimized structures of cross-coupling for L<sub>2</sub> and L<sub>3</sub> ligand.

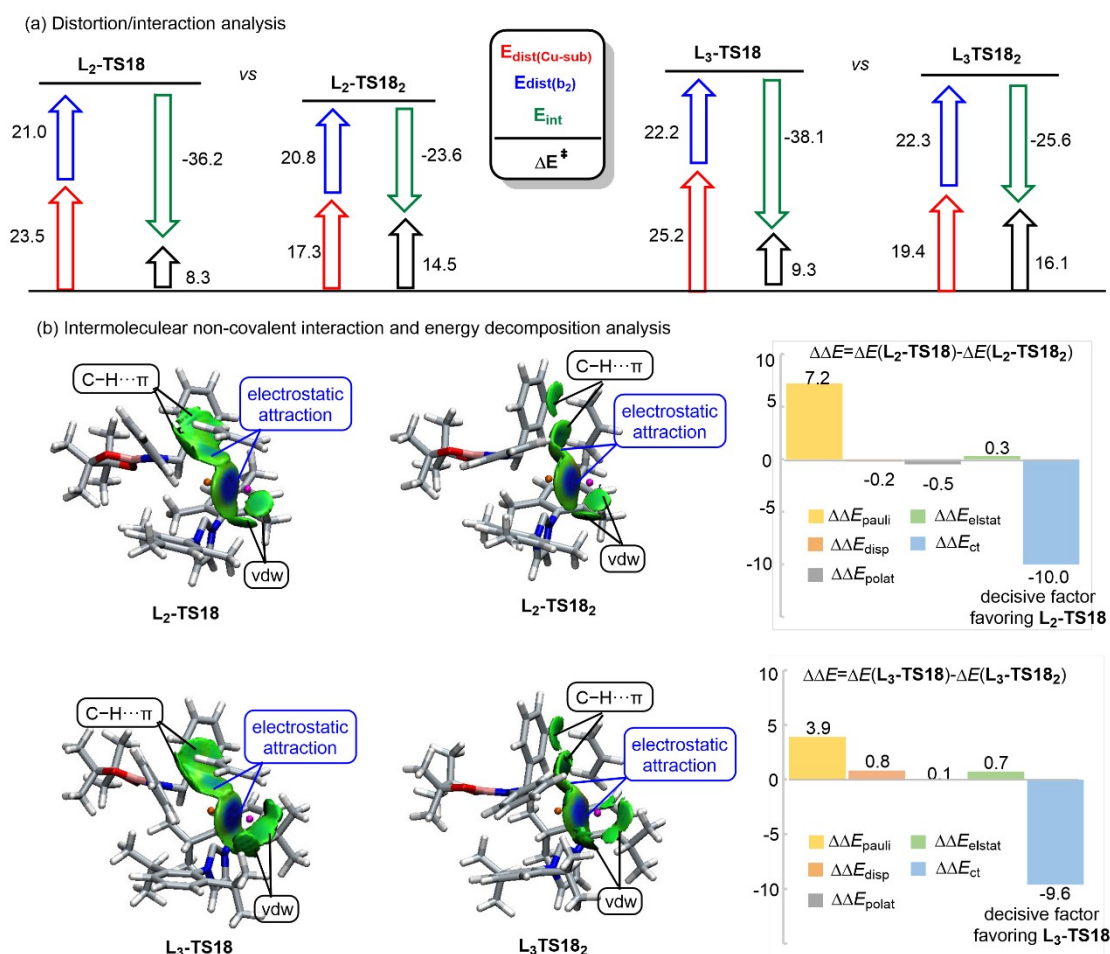

**Fig. S7.** (a) DI analysis. (b) NCIs and comparison of each energy term analysis for  $L_2\text{-TS18}$ ,  $L_2\text{-TS18}_2$ ,  $L_3\text{-TS18}$  and  $L_3\text{-TS18}_2$

We further explore the effect of the ligands on oxidation addition step by a visual analysis of noncovalent interactions (NCIs)<sup>1</sup> and energy decomposition analysis (EDA) according to your advice. The calculated results indicate the difference of charge transfer ( $\Delta\Delta E_{ct} = -10.0/-9.6$  kcal/mol) is the most significant factor that stabilize the  $L_2\text{-TS18}$  and  $L_3\text{-TS18}$ , and further confirm the charge transfer effects as the origin of regioselectivity.

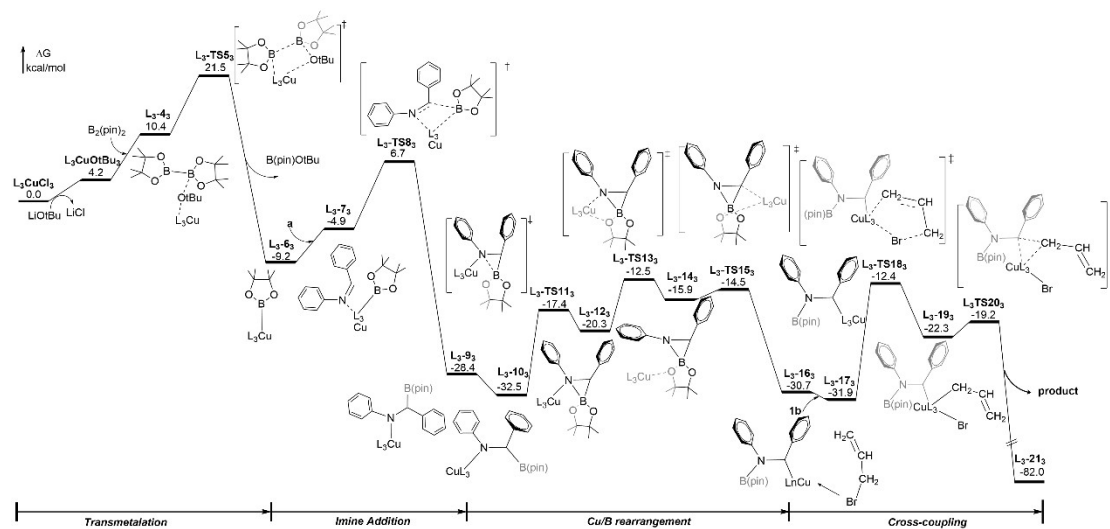

**Fig. S8.** Comparison of free energy profiles of solvent benzene effect on the catalytic reaction of ligand  $L_3$ .



## 2. The tables of EDA calculation results

**Table S1.** EDA results of the computed transition states for **1b** (in kcal/mol)

|                            | <b>L<sub>1</sub>-TS18</b> | <b>L<sub>1</sub>-TS18<sub>2</sub></b> | <b>L<sub>2</sub>-TS18</b> | <b>L<sub>2</sub>-TS18<sub>2</sub></b> | <b>L<sub>3</sub>-TS18</b> | <b>L<sub>3</sub>-TS18<sub>2</sub></b> |
|----------------------------|---------------------------|---------------------------------------|---------------------------|---------------------------------------|---------------------------|---------------------------------------|
| $\Delta E_{\text{Pauli}}$  | 85.4                      | 80.2                                  | 84.1                      | 76.9                                  | 89.6                      | 85.7                                  |
| $\Delta E_{\text{disp}}$   | -17.1                     | -17.8                                 | -16.8                     | -16.6                                 | -20.4                     | -21.2                                 |
| $\Delta E_{\text{pol}}$    | -15.0                     | -14.8                                 | -14.8                     | -14.3                                 | -15.4                     | -15.4                                 |
| $\Delta E_{\text{elstat}}$ | -9.6                      | -10.4                                 | -9.4                      | -9.7                                  | -10.6                     | -11.3                                 |
| $\Delta E_{\text{ct}}$     | -38.3                     | -28.1                                 | -37.9                     | -27.9                                 | -38.7                     | -29.1                                 |

**Table S2.** EDA results of the computed transition states for **2b** (in kcal/mol)

|                            | <b>L<sub>1</sub>-TS18<sub>3</sub></b> | <b>L<sub>1</sub>-TS18<sub>4</sub></b> | <b>L<sub>1</sub>-TS18<sub>5</sub></b> | <b>L<sub>1</sub>-TS18<sub>6</sub></b> |
|----------------------------|---------------------------------------|---------------------------------------|---------------------------------------|---------------------------------------|
| $\Delta E_{\text{Pauli}}$  | 137.8                                 | 79.6                                  | 88.9                                  | 76.7                                  |
| $\Delta E_{\text{disp}}$   | -26.2                                 | -18.2                                 | -20.2                                 | -17.2                                 |
| $\Delta E_{\text{pol}}$    | -23.8                                 | -15.4                                 | -16.8                                 | -14.6                                 |
| $\Delta E_{\text{elstat}}$ | 15.7                                  | -12.4                                 | -11.0                                 | -11.7                                 |
| $\Delta E_{\text{ct}}$     | -73.2                                 | -26.4                                 | -39.4                                 | -25.7                                 |

**Table S3.** EDA results of the computed transition states for **3b** (in kcal/mol)

|                            | <b>L<sub>1</sub>-TS18<sub>7</sub></b> | <b>L<sub>1</sub>-TS18<sub>8</sub></b> | <b>L<sub>1</sub>-TS18<sub>9</sub></b> | <b>L<sub>1</sub>-TS18<sub>10</sub></b> |
|----------------------------|---------------------------------------|---------------------------------------|---------------------------------------|----------------------------------------|
| $\Delta E_{\text{Pauli}}$  | 128.9                                 | 74.0                                  | 121.6                                 | 74.5                                   |
| $\Delta E_{\text{disp}}$   | -31.4                                 | -18.5                                 | -29.6                                 | -17.8                                  |
| $\Delta E_{\text{pol}}$    | -23.0                                 | -15.3                                 | -21.6                                 | -14.8                                  |
| $\Delta E_{\text{elstat}}$ | 15.9                                  | -12.0                                 | 11.4                                  | -10.9                                  |
| $\Delta E_{\text{ct}}$     | -66.0                                 | -26.4                                 | -61.2                                 | -25.7                                  |

### 3 Cartesian coordinates of all optimized structures involved in this study

#### 1a

|   |             |             |             |
|---|-------------|-------------|-------------|
| C | -0.40144000 | -0.40506700 | -0.17067600 |
| N | 0.45621800  | 0.50277200  | 0.11412300  |
| C | 1.83173500  | 0.21421000  | 0.06745800  |
| C | 2.69492200  | 1.22832900  | -0.37957000 |
| C | 2.38097500  | -1.00868200 | 0.49263800  |
| C | 4.06753500  | 1.00781900  | -0.44692400 |
| H | 2.26236000  | 2.17685800  | -0.68114700 |
| C | 3.75840000  | -1.21601700 | 0.43947500  |
| H | 1.72966900  | -1.77781300 | 0.89668600  |
| C | 4.60636500  | -0.21531000 | -0.03831500 |
| H | 4.72125500  | 1.79625000  | -0.80876900 |
| H | 4.17142500  | -2.16085300 | 0.78157400  |
| H | 5.67885800  | -0.38054000 | -0.07631800 |
| C | -1.84967900 | -0.18169700 | -0.08297500 |
| C | -2.72859000 | -1.22004100 | -0.42687300 |
| C | -2.37775600 | 1.05126200  | 0.33858000  |
| C | -4.10826000 | -1.03513700 | -0.35195200 |
| H | -2.32437700 | -2.17503300 | -0.75391500 |
| C | -3.75385400 | 1.23420900  | 0.41081200  |
| H | -1.68811200 | 1.84626100  | 0.60132400  |
| C | -4.62307400 | 0.19243700  | 0.06683500  |
| H | -4.77956700 | -1.84554900 | -0.61993700 |
| H | -4.15562600 | 2.18929300  | 0.73655000  |
| H | -5.69759500 | 0.33953500  | 0.12566400  |
| H | -0.09548800 | -1.40570600 | -0.51167000 |

#### 1b

|    |             |             |             |
|----|-------------|-------------|-------------|
| C  | 2.76408100  | -0.33578200 | -0.28882300 |
| H  | 2.86297300  | 0.03435600  | -1.30617400 |
| H  | 3.56583400  | -0.96655200 | 0.08161800  |
| C  | 1.71070700  | -0.02886900 | 0.46980000  |
| H  | 1.62903800  | -0.42103900 | 1.48138900  |
| C  | 0.60623400  | 0.85975000  | 0.02247700  |
| H  | 0.75255500  | 1.24406800  | -0.98587200 |
| H  | 0.40948200  | 1.67722000  | 0.71600900  |
| Br | -1.13445700 | -0.12967600 | -0.03450600 |

#### LiOtBu

|    |             |             |             |
|----|-------------|-------------|-------------|
| O  | 1.27086700  | 0.00080300  | -0.00007600 |
| C  | -0.11639100 | 0.00000100  | -0.00005800 |
| C  | -0.63022300 | -1.21893100 | -0.79633400 |
| H  | -0.25695800 | -2.14330000 | -0.34204800 |
| H  | -1.72543800 | -1.26727200 | -0.82694300 |
| H  | -0.25848200 | -1.17355500 | -1.82583000 |
| C  | -0.63105400 | -0.08070800 | 1.45341000  |
| H  | -0.25883200 | 0.77503400  | 2.02725200  |
| H  | -1.72633200 | -0.08382500 | 1.50986000  |
| H  | -0.25900900 | -0.99475500 | 1.92907000  |
| C  | -0.63197400 | 1.29867900  | -0.65707100 |
| H  | -0.26060500 | 1.36788700  | -1.68541100 |
| H  | -1.72726400 | 1.34843000  | -0.68176100 |
| H  | -0.25986600 | 2.16791800  | -0.10378700 |
| Li | 2.87456800  | 0.00092200  | 0.00017600  |

#### L<sub>1</sub>CuCl

|    |             |             |             |
|----|-------------|-------------|-------------|
| C  | 0.00114300  | -0.43284900 | -0.00008100 |
| C  | 0.77658600  | -2.66412100 | 0.00706700  |
| C  | -0.76531300 | -2.66728300 | 0.00502700  |
| N  | -1.08921600 | -1.22321300 | 0.00308900  |
| N  | 1.09465100  | -1.21876000 | 0.00075700  |
| C  | -3.10208100 | -0.54635400 | -1.22562000 |
| C  | -2.44925000 | -0.75797800 | 0.00163700  |
| C  | -3.10575100 | -0.55051100 | 1.22769500  |
| C  | -4.43775800 | -0.12773600 | 1.20029300  |
| C  | -5.11860300 | 0.09415500  | -0.00085600 |
| C  | -4.43419800 | -0.12360500 | -1.20068500 |
| H  | -4.95310500 | 0.03948000  | 2.14314500  |
| H  | -4.94675600 | 0.04676800  | -2.14448500 |
| C  | 3.10929900  | -0.54466600 | -1.22509600 |
| C  | 4.43953700  | -0.11368700 | -1.19852000 |
| C  | 5.11887200  | 0.11438400  | 0.00138900  |
| C  | 4.43154300  | -0.09319200 | 1.20233000  |
| C  | 3.10284400  | -0.52393200 | 1.22814200  |
| C  | 2.45323800  | -0.74941800 | 0.00073400  |
| H  | 4.95306600  | 0.05680200  | -2.14162000 |
| H  | 4.93916700  | 0.09410700  | 2.14568900  |
| Cu | -0.00448600 | 1.46377000  | -0.00483600 |

|                        |             |             |             |    |             |             |             |
|------------------------|-------------|-------------|-------------|----|-------------|-------------|-------------|
| H                      | -1.18701500 | -3.15423400 | -0.88022200 | H  | 5.17815900  | -2.62061700 | 0.86817800  |
| H                      | 1.20266900  | -3.15274300 | -0.87508300 | C  | -3.03539700 | -2.39949500 | 0.02185400  |
| C                      | -6.54522700 | 0.58942500  | -0.00203500 | C  | -4.35830500 | -2.19684600 | 0.42373700  |
| H                      | -7.09067400 | 0.24363000  | 0.88108100  | C  | -5.02271000 | -0.98843700 | 0.18807500  |
| H                      | -6.57766700 | 1.68583100  | 0.00309000  | C  | -4.32923700 | 0.03414900  | -0.46588300 |
| H                      | -7.08631200 | 0.25197500  | -0.89101400 | C  | -3.00301200 | -0.11548300 | -0.88739600 |
| C                      | 6.56236700  | 0.55858400  | 0.00648600  | C  | -2.36983100 | -1.34605600 | -0.63083100 |
| H                      | 7.23528400  | -0.28551600 | 0.20283300  | H  | -4.87963800 | -3.00106200 | 0.93748500  |
| H                      | 6.85061500  | 0.99206800  | -0.95503900 | H  | -4.82942800 | 0.98139800  | -0.65308800 |
| H                      | 6.74620900  | 1.30644200  | 0.78405100  | Cu | 0.04697400  | -0.42720400 | 1.39345600  |
| C                      | -2.39226200 | -0.74668200 | 2.54403900  | C  | 6.54310800  | -0.27184900 | 0.62023200  |
| H                      | -1.99649000 | -1.76292600 | 2.65357700  | H  | 7.00733600  | 0.49528500  | -0.00630800 |
| H                      | -1.54569100 | -0.05832100 | 2.63989400  | H  | 6.53957900  | 0.10661900  | 1.64986300  |
| H                      | -3.07017400 | -0.56351500 | 3.38111700  | H  | 7.18204600  | -1.15988800 | 0.60235800  |
| C                      | -2.38466500 | -0.73763000 | -2.54054200 | C  | -6.46247400 | -0.80134100 | 0.60462000  |
| H                      | -1.97893200 | -1.75009800 | -2.64796400 | H  | -7.14493400 | -1.01854900 | -0.22667600 |
| H                      | -3.06280600 | -0.56174200 | -3.37899900 | H  | -6.73009000 | -1.46726800 | 1.42991700  |
| H                      | -1.54450000 | -0.04127500 | -2.63573900 | H  | -6.65541500 | 0.22783900  | 0.92164800  |
| C                      | 2.38160700  | -0.70323000 | 2.54266700  | C  | 2.23195700  | 1.21345300  | -1.54726500 |
| H                      | 3.05702900  | -0.51858600 | 3.38144400  | H  | 1.66779100  | 0.84226300  | -2.40898400 |
| H                      | 1.54010100  | -0.00728400 | 2.62879400  | H  | 1.50490100  | 1.67444700  | -0.86417900 |
| H                      | 1.97705000  | -1.71527600 | 2.65820600  | H  | 2.88887200  | 2.01163300  | -1.90273100 |
| C                      | 2.39659900  | -0.74491200 | -2.54125600 | C  | 2.69883200  | -3.52910800 | 0.25874800  |
| H                      | 2.00035400  | -1.76131800 | -2.64725600 | H  | 2.40665700  | -4.04354500 | -0.66427600 |
| H                      | 1.55040900  | -0.05647900 | -2.64018400 | H  | 3.42833600  | -4.16109400 | 0.77087200  |
| H                      | 3.07519200  | -0.56522500 | -3.37853700 | H  | 1.80495900  | -3.46812200 | 0.88895200  |
| Cl                     | -0.01394800 | 3.58860500  | -0.00913600 | C  | -2.28971400 | 1.02985400  | -1.56493900 |
| H                      | -1.18942000 | -3.15267300 | 0.88989800  | H  | -3.01613300 | 1.74827900  | -1.95425600 |
| H                      | 1.20041400  | -3.14425400 | 0.89504900  | H  | -1.62708400 | 1.57955900  | -0.88021700 |
| <b>L<sub>1</sub>-1</b> |             |             |             | H  | -1.67432400 | 0.69339300  | -2.40558800 |
| C                      | 0.07318200  | -1.20194000 | -0.33901600 | C  | -2.34074400 | -3.70951600 | 0.31126200  |
| C                      | -0.67042100 | -2.06151100 | -2.40025600 | H  | -1.99118800 | -4.20209400 | -0.60356500 |
| C                      | 0.87204400  | -2.00393900 | -2.40302900 | H  | -1.46446900 | -3.56475700 | 0.95264800  |
| N                      | 1.17592700  | -1.45680800 | -1.06093500 | H  | -3.01752400 | -4.40057100 | 0.81953000  |
| N                      | -1.00956500 | -1.53916400 | -1.05669000 | Cl | 0.00374200  | 0.66942600  | 3.26397700  |
| C                      | 3.27700700  | -2.15987600 | -0.01181800 | O  | -0.19848300 | 3.22705000  | 0.30448600  |
| C                      | 2.51815400  | -1.15593200 | -0.64092900 | C  | -0.30318100 | 4.45363100  | -0.33949900 |
| C                      | 3.04430100  | 0.12570800  | -0.88625700 | C  | -0.07529300 | 4.28893900  | -1.86150000 |
| C                      | 4.35905200  | 0.37954400  | -0.47768100 | H  | -0.80880900 | 3.59189100  | -2.28080900 |
| C                      | 5.14065900  | -0.58906700 | 0.15809700  | H  | -0.16377400 | 5.24090400  | -2.39975500 |
| C                      | 4.58320300  | -1.85358000 | 0.37789900  | H  | 0.92408200  | 3.88327000  | -2.05172100 |
| H                      | 4.77914100  | 1.36526600  | -0.66270700 | C  | -1.71098500 | 5.05260300  | -0.10970800 |
|                        |             |             |             | H  | -1.88487600 | 5.19300700  | 0.96388000  |
|                        |             |             |             | H  | -1.84642900 | 6.02161800  | -0.60708600 |

|    |             |             |             |
|----|-------------|-------------|-------------|
| H  | -2.47559400 | 4.36374500  | -0.48542900 |
| C  | 0.75694700  | 5.43442300  | 0.21510100  |
| H  | 1.75873100  | 5.01154200  | 0.07981800  |
| H  | 0.72747400  | 6.41603300  | -0.27516000 |
| H  | 0.59724000  | 5.58646500  | 1.28969900  |
| Li | -0.12574700 | 2.43739700  | 1.78967600  |
| H  | -1.05678100 | -3.07821800 | -2.52269900 |
| H  | -1.12046000 | -1.43287000 | -3.17474500 |
| H  | 1.33211500  | -2.98938100 | -2.52617200 |
| H  | 1.27139500  | -1.34451500 | -3.17981200 |

**L<sub>1</sub>-TS2**

|    |             |             |             |
|----|-------------|-------------|-------------|
| C  | -0.06903600 | -0.93605400 | -0.35980100 |
| C  | -0.84909800 | -2.15413200 | -2.22121000 |
| C  | 0.66936600  | -2.36022500 | -2.08769900 |
| N  | 1.01738300  | -1.43789800 | -0.98177200 |
| N  | -1.16657700 | -1.37094500 | -1.00657900 |
| C  | 2.79778200  | -2.02434800 | 0.61142200  |
| C  | 2.37207500  | -1.30663900 | -0.52337400 |
| C  | 3.26285300  | -0.49506700 | -1.25024600 |
| C  | 4.58371200  | -0.39408700 | -0.80248100 |
| C  | 5.03490700  | -1.07392000 | 0.33214400  |
| C  | 4.12833700  | -1.88736900 | 1.01872500  |
| H  | 5.27436300  | 0.24004500  | -1.35347300 |
| H  | 4.46441400  | -2.43541500 | 1.89587900  |
| C  | -3.27396400 | -1.96381400 | 0.08601000  |
| C  | -4.60074400 | -1.65114000 | 0.38924300  |
| C  | -5.18809100 | -0.45054800 | -0.02622200 |
| C  | -4.41300500 | 0.44428900  | -0.76738100 |
| C  | -3.07787400 | 0.17937700  | -1.09873800 |
| C  | -2.52269300 | -1.03625400 | -0.66147300 |
| H  | -5.18735500 | -2.36004200 | 0.96906500  |
| H  | -4.85450000 | 1.38008500  | -1.10214900 |
| Cu | -0.14517800 | 0.18288100  | 1.18130100  |
| C  | 6.45589100  | -0.91470000 | 0.81824200  |
| H  | 7.14145500  | -0.70553800 | -0.00831200 |
| H  | 6.53617600  | -0.08154000 | 1.52730000  |
| H  | 6.80652000  | -1.81428500 | 1.33292100  |
| C  | -6.61551900 | -0.12215900 | 0.34301900  |
| H  | -7.24659900 | -1.01642300 | 0.34027800  |
| H  | -6.67086500 | 0.31035100  | 1.34965100  |
| H  | -7.05119400 | 0.60424500  | -0.34895400 |
| C  | 2.82653300  | 0.24999700  | -2.48905900 |

|    |             |             |             |
|----|-------------|-------------|-------------|
| H  | 2.82835100  | -0.40102000 | -3.37332700 |
| H  | 1.81886900  | 0.65789200  | -2.37991800 |
| H  | 3.50569000  | 1.07965200  | -2.69912800 |
| C  | 1.86148300  | -2.92017000 | 1.38816300  |
| H  | 1.25156900  | -3.54661500 | 0.72924100  |
| H  | 2.42548900  | -3.57945900 | 2.05300800  |
| H  | 1.17000600  | -2.33521500 | 2.00527500  |
| C  | -2.26943300 | 1.19970100  | -1.85907400 |
| H  | -2.92990000 | 1.90197700  | -2.37564400 |
| H  | -1.62565800 | 1.77768100  | -1.17938400 |
| H  | -1.62001500 | 0.73728500  | -2.60922600 |
| C  | -2.66504300 | -3.25654800 | 0.57548000  |
| H  | -2.35678900 | -3.90940400 | -0.24999500 |
| H  | -1.77722400 | -3.06945500 | 1.18839100  |
| H  | -3.38239200 | -3.81381900 | 1.18287900  |
| Cl | -0.54053500 | 0.94010600  | 3.22889300  |
| O  | -0.26134800 | 2.92400600  | 0.31494300  |
| C  | 0.61694800  | 3.78131100  | -0.34871400 |
| C  | 0.42520400  | 3.67637500  | -1.87901000 |
| H  | -0.60164800 | 3.94460000  | -2.14961100 |
| H  | 1.10830900  | 4.33520700  | -2.42931200 |
| H  | 0.60198000  | 2.64751300  | -2.21044800 |
| C  | 0.34441400  | 5.24472200  | 0.07699300  |
| H  | 0.49777200  | 5.35559800  | 1.15870100  |
| H  | 1.00105300  | 5.96455500  | -0.42815500 |
| H  | -0.69439100 | 5.51044400  | -0.14934800 |
| C  | 2.07888100  | 3.42341400  | 0.00450500  |
| H  | 2.28507900  | 2.38237700  | -0.26490700 |
| H  | 2.80630200  | 4.06603200  | -0.50831300 |
| H  | 2.23851600  | 3.52356300  | 1.08466600  |
| Li | -0.77748300 | 2.76195900  | 1.93272200  |
| H  | 1.21492500  | -2.10240300 | -2.99845300 |
| H  | 0.93361800  | -3.38809900 | -1.81101400 |
| H  | -1.11945500 | -1.58103800 | -3.11579800 |
| H  | -1.40895000 | -3.09276900 | -2.23731700 |

**LiCl**

|    |            |            |             |
|----|------------|------------|-------------|
| Cl | 0.00000000 | 0.00000000 | 0.30819100  |
| Li | 0.00000000 | 0.00000000 | -1.74641300 |

**L<sub>1</sub>-3**

|   |            |             |            |
|---|------------|-------------|------------|
| C | 0.22456500 | -0.89167000 | 0.00284900 |
|---|------------|-------------|------------|

|    |             |             |             |                                       |             |             |             |
|----|-------------|-------------|-------------|---------------------------------------|-------------|-------------|-------------|
| C  | 1.19706900  | -3.04729400 | -0.00376400 | H                                     | 2.20409600  | -1.92416900 | -2.64188500 |
| C  | -0.33499700 | -3.18803000 | 0.07886500  | H                                     | 1.69539500  | -0.23630300 | -2.59610100 |
| N  | -0.78948500 | -1.78297500 | -0.00183900 | H                                     | 3.22110500  | -0.67891800 | -3.37629700 |
| N  | 1.38464400  | -1.58134700 | 0.03097600  | O                                     | 0.09271400  | 2.77721900  | -0.04076400 |
| C  | -2.88751100 | -1.40151400 | -1.20765700 | C                                     | -0.96934100 | 3.69270400  | -0.02589300 |
| C  | -2.18632100 | -1.44985400 | 0.00995800  | C                                     | -1.86035900 | 3.51521700  | -1.27433400 |
| C  | -2.83139900 | -1.20844200 | 1.23654000  | H                                     | -1.25228800 | 3.61637900  | -2.17957500 |
| C  | -4.19928900 | -0.92053300 | 1.21863800  | H                                     | -2.30869400 | 2.51459700  | -1.27520800 |
| C  | -4.92992700 | -0.87122000 | 0.02688700  | H                                     | -2.67043700 | 4.25473000  | -1.31660900 |
| C  | -4.25494000 | -1.11084800 | -1.17387400 | C                                     | -0.35228100 | 5.10673500  | -0.03435900 |
| H  | -4.70461400 | -0.72397100 | 2.16140600  | H                                     | -1.11720300 | 5.89279800  | -0.02583700 |
| H  | -4.80308400 | -1.06237900 | -2.11182100 | H                                     | 0.28988800  | 5.23600200  | 0.84281700  |
| C  | 3.29869500  | -0.68973100 | -1.22359900 | H                                     | 0.26834400  | 5.23437500  | -0.92711400 |
| C  | 4.58726300  | -0.14765300 | -1.21319700 | C                                     | -1.82563600 | 3.51576000  | 1.24679500  |
| C  | 5.27903100  | 0.09272600  | -0.02208800 | H                                     | -2.27770700 | 2.51679800  | 1.25834400  |
| C  | 4.64558000  | -0.21531100 | 1.18596500  | H                                     | -1.19167900 | 3.61329600  | 2.13455800  |
| C  | 3.35838400  | -0.75836400 | 1.22734300  | H                                     | -2.63190000 | 4.25766500  | 1.31321100  |
| C  | 2.69611100  | -0.99517900 | 0.00971400  | H                                     | -0.75234600 | -3.77812900 | -0.74248900 |
| H  | 5.05758200  | 0.10127300  | -2.16156700 | H                                     | 1.60851000  | -3.46186900 | -0.93116400 |
| H  | 5.16151100  | -0.01907300 | 2.12294500  |                                       |             |             |             |
| Cu | 0.06935600  | 0.97962400  | -0.02145400 | <b>B<sub>2</sub>(pin)<sub>2</sub></b> |             |             |             |
| H  | -0.66677900 | -3.64101800 | 1.02013500  | B                                     | -0.85316000 | -0.00022700 | 0.00030400  |
| H  | 1.71392900  | -3.52383400 | 0.83482400  | O                                     | -1.61574000 | -1.08126500 | 0.37271300  |
| C  | -6.41299800 | -0.58560800 | 0.04071800  | O                                     | -1.61538900 | 1.08102400  | -0.37224100 |
| H  | -6.99127800 | -1.50327100 | 0.20716800  | C                                     | -3.00462500 | 0.78754100  | -0.04605900 |
| H  | -6.67707000 | 0.11362200  | 0.83970900  | C                                     | -3.00479200 | -0.78750800 | 0.04599000  |
| H  | -6.74630100 | -0.15725500 | -0.90882500 | C                                     | -3.29226000 | -1.47938000 | -1.29329100 |
| C  | 6.68177500  | 0.65253800  | -0.04022500 | H                                     | -3.07495700 | -2.54618900 | -1.19361200 |
| H  | 7.42823100  | -0.15111800 | -0.07636700 | H                                     | -4.33916900 | -1.36643500 | -1.59047100 |
| H  | 6.84646800  | 1.28932600  | -0.91424300 | H                                     | -2.65953000 | -1.08004400 | -2.09055700 |
| H  | 6.88626600  | 1.24637200  | 0.85543000  | C                                     | -3.89178100 | -1.37819400 | 1.14029100  |
| C  | -2.06922300 | -1.21724100 | 2.53996300  | H                                     | -4.94563400 | -1.14045600 | 0.96069800  |
| H  | -1.51207100 | -2.14903100 | 2.68744000  | H                                     | -3.78710500 | -2.46673300 | 1.14684400  |
| H  | -1.34222400 | -0.39823600 | 2.57281700  | H                                     | -3.61451100 | -1.00858500 | 2.12893000  |
| H  | -2.74997600 | -1.09803900 | 3.38640000  | C                                     | -3.89110900 | 1.37845700  | -1.14066800 |
| C  | -2.18394700 | -1.62102100 | -2.52555900 | H                                     | -3.61355100 | 1.00886100  | -2.12922700 |
| H  | -1.38243000 | -0.88926600 | -2.67083400 | H                                     | -4.94507700 | 1.14091400  | -0.96148700 |
| H  | -1.72812500 | -2.61599600 | -2.59006900 | H                                     | -3.78621500 | 2.46697500  | -1.14712300 |
| H  | -2.88503400 | -1.52472000 | -3.35817900 | C                                     | -3.29243400 | 1.47940300  | 1.29314800  |
| C  | 2.68869100  | -1.04129600 | 2.55078700  | H                                     | -4.33949600 | 1.36675200  | 1.58989200  |
| H  | 1.79303800  | -0.42347900 | 2.67667000  | H                                     | -2.66015000 | 1.07977000  | 2.09062200  |
| H  | 2.37422900  | -2.08740500 | 2.64074500  | H                                     | -3.07475300 | 2.54615400  | 1.19367400  |
| H  | 3.36646700  | -0.82609100 | 3.38054100  | B                                     | 0.85317300  | -0.00020600 | 0.00031600  |
| C  | 2.56717400  | -0.89658400 | -2.52824600 |                                       |             |             |             |

|                        |             |             |             |   |             |             |             |
|------------------------|-------------|-------------|-------------|---|-------------|-------------|-------------|
| C                      | 3.00462100  | 0.78754600  | -0.04638800 | C | -7.09133600 | -2.19205400 | 0.76494200  |
| O                      | 1.61541700  | 1.08085400  | -0.37275000 | H | -7.71652400 | -1.90989100 | 1.61761500  |
| C                      | 3.00480100  | -0.78750900 | 0.04634800  | H | -7.74599800 | -2.37195200 | -0.09275400 |
| O                      | 1.61574200  | -1.08108500 | 0.37317200  | H | -6.61165200 | -3.14616700 | 1.01566600  |
| C                      | 3.29241300  | 1.48009400  | 1.29245400  | C | 4.32852400  | 4.42202100  | -0.59824800 |
| H                      | 4.33947500  | 1.36766300  | 1.58926100  | H | 4.45381400  | 5.42099300  | -0.16899900 |
| H                      | 3.07465200  | 2.54677600  | 1.19240500  | H | 4.96323100  | 3.73856800  | -0.02141900 |
| H                      | 2.66011900  | 1.08088000  | 2.09012400  | H | 4.71414800  | 4.44097100  | -1.62166600 |
| C                      | 3.89111400  | 1.37793900  | -1.14129800 | C | -4.22310800 | 0.27622400  | -2.58230100 |
| H                      | 3.78611700  | 2.46644400  | -1.14833000 | H | -4.54981500 | 1.25413000  | -2.95754000 |
| H                      | 4.94509700  | 1.14057500  | -0.96198500 | H | -3.13476400 | 0.23780700  | -2.68549900 |
| H                      | 3.61359200  | 1.00777500  | -2.12965500 | H | -4.65291600 | -0.48441800 | -3.23850000 |
| C                      | 3.29228900  | -1.47999300 | -1.29259200 | C | -3.91986500 | 1.39553700  | 2.37207300  |
| H                      | 4.33920400  | -1.36724200 | -1.58979200 | H | -2.84703800 | 1.20928100  | 2.48508600  |
| H                      | 3.07490600  | -2.54674100 | -1.19244200 | H | -4.04365200 | 2.47280700  | 2.21228200  |
| H                      | 2.65957900  | -1.08099100 | -2.09003800 | H | -4.40832400 | 1.14175600  | 3.31604700  |
| C                      | 3.89176300  | -1.37774400 | 1.14095100  | C | 0.49265800  | 1.88604800  | -2.67876200 |
| H                      | 3.78684700  | -2.46625700 | 1.14810000  | H | 1.12714400  | 1.97369300  | -3.56479500 |
| H                      | 4.94565900  | -1.14031900 | 0.96120400  | H | 0.49446100  | 0.83500900  | -2.36591200 |
| H                      | 3.61460400  | -1.00752600 | 2.12938700  | H | -0.53131400 | 2.14273600  | -2.96765400 |
| <b>L<sub>1</sub>-4</b> |             |             |             | C | -0.14602500 | 4.34939700  | 1.73815600  |
| C                      | -1.76645400 | 1.66076400  | -0.20102000 | H | -0.89781200 | 5.09899400  | 1.46047800  |
| C                      | -2.16955300 | 3.84241100  | -1.01480200 | H | -0.68344800 | 3.49152500  | 2.15318300  |
| C                      | -3.51629300 | 3.16199700  | -0.73594200 | H | 0.46585200  | 4.78412300  | 2.53245200  |
| N                      | -3.10194200 | 1.78529700  | -0.38843800 | O | 0.07279300  | -1.36396700 | 1.26213200  |
| N                      | -1.20202200 | 2.85523800  | -0.48530600 | C | 0.15057600  | -1.60081400 | 2.68601700  |
| C                      | -4.50344400 | 0.58799500  | 1.23680700  | C | 0.73377000  | -0.35580300 | 3.37164600  |
| C                      | -4.08437200 | 0.78127700  | -0.09306600 | H | 1.74827000  | -0.17332400 | 3.01088000  |
| C                      | -4.65314300 | 0.05121700  | -1.15197200 | H | 0.11607700  | 0.52349300  | 3.15283500  |
| C                      | -5.63490300 | -0.89825100 | -0.85051700 | H | 0.76661700  | -0.48727200 | 4.45964000  |
| C                      | -6.05892300 | -1.13258100 | 0.46063700  | C | 1.01390800  | -2.83444600 | 2.98932100  |
| C                      | -5.48501500 | -0.37516600 | 1.48730200  | H | 0.97047000  | -3.05528600 | 4.06206600  |
| H                      | -6.07448800 | -1.47225500 | -1.66283200 | H | 0.65353500  | -3.69997700 | 2.43046500  |
| H                      | -5.81146800 | -0.53447200 | 2.51239400  | H | 2.05632900  | -2.65936900 | 2.71719200  |
| C                      | 0.71581600  | 3.94547300  | 0.56498900  | C | -1.28872900 | -1.85037200 | 3.16018100  |
| C                      | 2.05403100  | 4.34061000  | 0.50756800  | H | -1.32686200 | -1.98444400 | 4.24714100  |
| C                      | 2.88378000  | 3.98195500  | -0.56106500 | H | -1.93258100 | -1.00477900 | 2.89580800  |
| C                      | 2.34549800  | 3.19075100  | -1.57894900 | H | -1.69461300 | -2.74861100 | 2.68507000  |
| C                      | 1.01073500  | 2.76683000  | -1.56829400 | B | 1.03616000  | -1.83615500 | 0.13753000  |
| C                      | 0.20134000  | 3.16456000  | -0.48887800 | O | 0.29304400  | -1.32519000 | -1.07147300 |
| H                      | 2.45704000  | 4.94652900  | 1.31591900  | O | 1.01942600  | -3.29268000 | -0.01011900 |
| H                      | 2.97600600  | 2.89580300  | -2.41408300 | C | 0.63868900  | -3.63393800 | -1.33823100 |
| Cu                     | -0.83613900 | 0.08174000  | 0.27041600  | C | -0.31557800 | -2.44964600 | -1.74543900 |
|                        |             |             |             | C | -1.74437300 | -2.65885200 | -1.21620400 |

|                           |             |             |             |    |             |             |             |
|---------------------------|-------------|-------------|-------------|----|-------------|-------------|-------------|
| H                         | -2.31408700 | -1.73121300 | -1.33010900 | C  | 0.46754600  | -4.26799000 | -1.12300700 |
| H                         | -2.27160400 | -3.44541000 | -1.76752100 | C  | 1.96001400  | -3.98062500 | -0.89465700 |
| H                         | -1.72893500 | -2.91993200 | -0.15643900 | N  | 1.94248900  | -2.60504900 | -0.34557000 |
| C                         | -0.36171400 | -2.14275500 | -3.24406300 | N  | -0.17633200 | -3.02132600 | -0.64845900 |
| H                         | -0.72647900 | -3.00536600 | -3.81344000 | C  | 3.87462800  | -2.23042500 | 1.11422600  |
| H                         | -1.04363300 | -1.30608700 | -3.43390300 | C  | 3.18611600  | -1.93762900 | -0.07749600 |
| H                         | 0.62453300  | -1.86679500 | -3.62150300 | C  | 3.73004700  | -1.07621500 | -1.04728400 |
| C                         | -0.03268700 | -5.01236400 | -1.31302600 | C  | 4.98875700  | -0.51819100 | -0.79872800 |
| H                         | -0.85256600 | -5.04548600 | -0.59295600 | C  | 5.70600400  | -0.79390100 | 0.36901800  |
| H                         | -0.41881600 | -5.28961900 | -2.30101400 | C  | 5.13084200  | -1.65111000 | 1.31283800  |
| H                         | 0.70259100  | -5.76656100 | -1.01553500 | H  | 5.41855200  | 0.14836800  | -1.54259400 |
| C                         | 1.89953200  | -3.70621900 | -2.22341900 | H  | 5.66856800  | -1.86879200 | 2.23290200  |
| H                         | 1.67480000  | -4.06050500 | -3.23575800 | C  | -2.42742600 | -3.49266200 | 0.19121200  |
| H                         | 2.39267400  | -2.73381800 | -2.28642100 | C  | -3.81396700 | -3.42309400 | 0.01362200  |
| H                         | 2.60066600  | -4.41054600 | -1.76474800 | C  | -4.38543300 | -2.76218700 | -1.07721500 |
| B                         | 2.65678900  | -1.22354400 | 0.25517000  | C  | -3.53183200 | -2.15405200 | -2.00326700 |
| C                         | 4.71683700  | -0.56178200 | 1.09851500  | C  | -2.14111300 | -2.19529100 | -1.87298500 |
| O                         | 3.42005800  | -1.12539600 | 1.41593200  | C  | -1.60032600 | -2.87395100 | -0.76330100 |
| C                         | 4.82478800  | -0.82907500 | -0.44978700 | H  | -4.46020500 | -3.90005300 | 0.74705200  |
| O                         | 3.43443500  | -0.89517200 | -0.85075900 | H  | -3.95834100 | -1.63283100 | -2.85706700 |
| C                         | 5.77151300  | -1.25926300 | 1.95846600  | Cu | 0.25852000  | -0.26503300 | 0.23061700  |
| H                         | 6.77930300  | -0.90830400 | 1.70979300  | C  | 7.04938900  | -0.15265800 | 0.62472000  |
| H                         | 5.58774500  | -1.03740500 | 3.01408000  | H  | 7.71059300  | -0.81738900 | 1.18919500  |
| H                         | 5.73869000  | -2.34292400 | 1.83411600  | H  | 7.55075100  | 0.11343800  | -0.31034900 |
| C                         | 4.65754600  | 0.92955800  | 1.45938100  | H  | 6.93763100  | 0.76867300  | 1.20945500  |
| H                         | 4.38892700  | 1.02767500  | 2.51530900  | C  | -5.88457600 | -2.68578400 | -1.24587400 |
| H                         | 5.62371700  | 1.42237600  | 1.30630600  | H  | -6.39697900 | -3.41972200 | -0.61743100 |
| H                         | 3.89834300  | 1.44919300  | 0.86922500  | H  | -6.26116500 | -1.69343900 | -0.97016600 |
| C                         | 5.51286000  | 0.27167500  | -1.25732600 | H  | -6.17901700 | -2.86437600 | -2.28526600 |
| H                         | 6.55910100  | 0.39025000  | -0.95401000 | C  | 2.98492000  | -0.74005300 | -2.31576900 |
| H                         | 5.49785200  | 0.00744100  | -2.31910200 | H  | 2.57290500  | -1.63301500 | -2.79852800 |
| H                         | 5.00395500  | 1.23052800  | -1.14349000 | H  | 2.14852100  | -0.06063100 | -2.11331500 |
| C                         | 5.45293700  | -2.18975300 | -0.78791800 | H  | 3.65050200  | -0.24953200 | -3.03108800 |
| H                         | 5.31826700  | -2.38573200 | -1.85537700 | C  | 3.28155400  | -3.13683200 | 2.16723300  |
| H                         | 6.52485200  | -2.21182300 | -0.56608000 | H  | 2.22538700  | -2.91081800 | 2.34046400  |
| H                         | 4.96439600  | -2.99715200 | -0.23598500 | H  | 3.34714800  | -4.19546400 | 1.88491100  |
| H                         | -4.05222600 | 3.61836400  | 0.10546000  | H  | 3.81339400  | -3.02337600 | 3.11523800  |
| H                         | -4.18376000 | 3.16291400  | -1.60171100 | C  | -1.26462500 | -1.51320700 | -2.89442200 |
| H                         | -2.06330600 | 4.80564400  | -0.50965900 | H  | -1.83721500 | -1.28870000 | -3.79836700 |
| H                         | -1.99068600 | 3.99881700  | -2.08578500 | H  | -0.86557400 | -0.56830600 | -2.50629500 |
|                           |             |             |             | H  | -0.40986600 | -2.13434900 | -3.18311700 |
| <b>L<sub>1</sub>- TS5</b> |             |             |             | C  | -1.85385800 | -4.22211000 | 1.38358800  |
|                           |             |             |             | H  | -1.49847000 | -5.22583200 | 1.11698800  |
| C                         | 0.70354100  | -2.08295400 | -0.24202300 | H  | -1.00891400 | -3.68105600 | 1.81841900  |

|   |             |             |             |                 |             |             |             |
|---|-------------|-------------|-------------|-----------------|-------------|-------------|-------------|
| H | -2.61300200 | -4.34758800 | 2.15991200  | H               | -2.67628600 | 2.77862900  | 3.72494100  |
| O | 1.41090200  | 1.68517400  | 0.44535100  | C               | -2.90736600 | -0.59752200 | 2.97825000  |
| C | 2.08560500  | 2.39867000  | 1.50198800  | H               | -2.15537600 | -0.87414500 | 3.72330500  |
| C | 2.91370700  | 1.35105800  | 2.25779000  | H               | -3.89719700 | -0.80708700 | 3.39711400  |
| H | 2.25324200  | 0.60678900  | 2.71536000  | H               | -2.76161300 | -1.22523000 | 2.09614300  |
| H | 3.59425500  | 0.83490700  | 1.57635500  | C               | -4.84608400 | 0.54736400  | 1.11744400  |
| H | 3.50446700  | 1.81962300  | 3.05325000  | H               | -5.55828500 | 0.66136800  | 1.94248000  |
| C | 1.12740600  | 3.09885000  | 2.47988500  | H               | -5.32464800 | 0.91893600  | 0.20623200  |
| H | 1.70909500  | 3.59147400  | 3.26799500  | H               | -4.63398500 | -0.51390700 | 0.97883600  |
| H | 0.52768000  | 3.85094800  | 1.96481700  | C               | -3.89095700 | 2.85001600  | 1.38692400  |
| H | 0.45146100  | 2.37855800  | 2.94388300  | H               | -4.33749800 | 3.12336500  | 0.42756800  |
| C | 3.02136600  | 3.43676000  | 0.85917000  | H               | -4.59996600 | 3.10789200  | 2.18001300  |
| H | 3.62176000  | 3.94842400  | 1.62100600  | H               | -2.98248900 | 3.44412200  | 1.51339700  |
| H | 3.70187000  | 2.95032300  | 0.15297800  | H               | 0.22159700  | -4.43627200 | -2.17687800 |
| H | 2.43844500  | 4.19035000  | 0.32358400  | H               | 0.10995400  | -5.12931500 | -0.55118700 |
| B | 0.10999400  | 1.96287500  | -0.19952900 | H               | 2.54660300  | -4.00705400 | -1.81881600 |
| O | 0.12304500  | 1.56164500  | -1.60987200 | H               | 2.42065800  | -4.67194000 | -0.18248500 |
| O | -0.33044900 | 3.34069700  | -0.17130400 |                 |             |             |             |
| C | -0.63069600 | 3.79049300  | -1.50461800 |                 |             |             |             |
| C | 0.11733100  | 2.74320300  | -2.42471100 |                 |             |             |             |
| C | 1.57090100  | 3.13838600  | -2.74345700 | <b>tBuOBPin</b> |             |             |             |
| H | 2.05800700  | 2.30063500  | -3.25218400 | O               | -1.56557800 | -0.83748400 | -0.31031900 |
| H | 1.62516500  | 4.01144700  | -3.40318300 | C               | -2.73239400 | -0.03587100 | 0.00419800  |
| H | 2.13493500  | 3.34837700  | -1.83406600 | C               | -3.92162700 | -0.93655200 | -0.34320200 |
| C | -0.60514500 | 2.42166100  | -3.73720700 | H               | -3.89668700 | -1.20813000 | -1.40246000 |
| H | -0.69918400 | 3.31268400  | -4.36838800 | H               | -3.88573400 | -1.85757500 | 0.24572000  |
| H | -0.03185600 | 1.67516200  | -4.29697900 | H               | -4.86753200 | -0.42675100 | -0.13577300 |
| H | -1.60159300 | 2.01529200  | -3.55525700 | C               | -2.74003900 | 1.23048700  | -0.86138500 |
| C | -0.12332500 | 5.23115600  | -1.63790500 | H               | -3.65305700 | 1.80773200  | -0.68367400 |
| H | 0.94026900  | 5.30967800  | -1.40545700 | H               | -1.87959600 | 1.86243700  | -0.63082300 |
| H | -0.28814500 | 5.61672900  | -2.65061200 | H               | -2.70589900 | 0.96340000  | -1.92228600 |
| H | -0.66770600 | 5.87478300  | -0.93984800 | C               | -2.73085800 | 0.30561800  | 1.50013200  |
| C | -2.15469400 | 3.77981000  | -1.70267200 | H               | -3.64379300 | 0.84677800  | 1.76896200  |
| H | -2.43634800 | 4.17053600  | -2.68628000 | H               | -2.69022200 | -0.61146200 | 2.09623200  |
| H | -2.56043800 | 2.77423900  | -1.58218300 | H               | -1.87092200 | 0.92862500  | 1.75670700  |
| H | -2.61062400 | 4.42037100  | -0.94218100 | B               | -0.27494600 | -0.45388900 | -0.17735500 |
| B | -1.34926200 | 1.11247900  | 0.78701200  | O               | 0.75059600  | -1.29857200 | -0.54812400 |
| C | -2.73993900 | 0.88976000  | 2.63669100  | O               | 0.17777500  | 0.75702800  | 0.32142400  |
| O | -1.37362300 | 1.06941900  | 2.17943800  | C               | 1.60898700  | 0.81325100  | 0.06657600  |
| C | -3.57153700 | 1.34845500  | 1.38083300  | C               | 1.98300200  | -0.71670400 | -0.05441300 |
| O | -2.64292900 | 1.11128300  | 0.28638600  | C               | 2.27792000  | -1.37300300 | 1.30140400  |
| C | -2.93924500 | 1.73368100  | 3.89605000  | H               | 2.31616300  | -2.45719700 | 1.16675500  |
| H | -3.97748100 | 1.68491800  | 4.24270000  | H               | 3.23548200  | -1.04181500 | 1.71434100  |
| H | -2.29852300 | 1.35198700  | 4.69669900  |                 |             |             |             |



|                        |             |             |             |   |             |             |             |
|------------------------|-------------|-------------|-------------|---|-------------|-------------|-------------|
| H                      | 1.49133200  | -1.15061300 | 2.02799700  | C | -6.56471200 | -0.69976700 | 0.02642400  |
| C                      | 3.10013000  | -1.03519800 | -1.04586600 | H | -7.06270500 | -0.96685800 | 0.96351700  |
| H                      | 4.03919700  | -0.55919200 | -0.74466500 | H | -6.62073100 | 0.39143800  | -0.07151500 |
| H                      | 3.26362900  | -2.11612500 | -1.07671300 | H | -7.13874200 | -1.13097400 | -0.79905200 |
| H                      | 2.84808400  | -0.70543100 | -2.05501000 | C | 2.24673800  | -1.60560100 | -2.47929900 |
| C                      | 2.27577700  | 1.55961700  | 1.21959000  | H | 1.70132400  | -2.54215100 | -2.63720100 |
| H                      | 2.03812600  | 1.10689400  | 2.18367600  | H | 1.50663700  | -0.79693100 | -2.47431200 |
| H                      | 3.36387700  | 1.57311900  | 1.09789700  | H | 2.90672900  | -1.45204500 | -3.33677900 |
| H                      | 1.92569700  | 2.59578500  | 1.23783000  | C | 2.53069600  | -2.31728800 | 2.54790200  |
| C                      | 1.79989000  | 1.58591400  | -1.24517500 | H | 1.64413400  | -1.70257700 | 2.73434900  |
| H                      | 2.85876800  | 1.73067800  | -1.47905500 | H | 2.20906000  | -3.36528900 | 2.57755100  |
| H                      | 1.32875100  | 1.06544000  | -2.08366700 | H | 3.22875700  | -2.16516900 | 3.37481500  |
| H                      | 1.33200700  | 2.56972000  | -1.15021900 | C | -2.52990400 | -2.31799300 | -2.54794000 |
| <b>L<sub>1</sub>-6</b> |             |             |             | H | -3.22823300 | -2.16659100 | -3.37476000 |
| C                      | 0.00034100  | -1.65435300 | -0.00006200 | H | -1.64391200 | -1.70252400 | -2.73461600 |
| C                      | -0.76619900 | -3.89114100 | 0.05699200  | H | -2.20733800 | -3.36570600 | -2.57750600 |
| C                      | 0.76764400  | -3.89087700 | -0.05703400 | C | -2.24594000 | -1.60643700 | 2.47927700  |
| N                      | 1.08815400  | -2.44873500 | 0.05298200  | H | -1.69998500 | -2.54269400 | 2.63702800  |
| N                      | -1.08720100 | -2.44910100 | -0.05308400 | H | -1.50629600 | -0.79734900 | 2.47435000  |
| C                      | 3.17613500  | -1.95390800 | 1.23186100  | H | -2.90596700 | -1.45336300 | 3.33681500  |
| C                      | 2.44860100  | -1.98747400 | 0.02898900  | B | -0.00046200 | 2.31614800  | -0.00015800 |
| C                      | 3.03671500  | -1.61306400 | -1.19273600 | C | 0.42601100  | 4.50264200  | -0.65964700 |
| C                      | 4.37549900  | -1.21014300 | -1.18494500 | O | 0.32259400  | 3.12342800  | -1.09388900 |
| C                      | 5.13013300  | -1.16894200 | -0.00861000 | C | -0.42783000 | 4.50235200  | 0.65974800  |
| C                      | 4.51246000  | -1.54595800 | 1.18782600  | O | -0.32385400 | 3.12308700  | 1.09373800  |
| H                      | 4.83825100  | -0.91735900 | -2.12463000 | C | -0.09515500 | 5.40512500  | -1.77875000 |
| H                      | 5.08148700  | -1.51481200 | 2.11412900  | H | -0.08111500 | 6.45917900  | -1.47829200 |
| C                      | -3.03598300 | -1.61417700 | 1.19275600  | H | 0.54304500  | 5.29763300  | -2.66122900 |
| C                      | -4.37493600 | -1.21175700 | 1.18505800  | H | -1.11315500 | 5.13851000  | -2.06861800 |
| C                      | -5.12965100 | -1.17080800 | 0.00878900  | C | 1.91768500  | 4.78428900  | -0.41861800 |
| C                      | -4.51189900 | -1.54755100 | -1.18771600 | H | 2.47026700  | 4.56512400  | -1.33691300 |
| C                      | -3.17543900 | -1.95498700 | -1.23184400 | H | 2.10036400  | 5.82965400  | -0.14746500 |
| C                      | -2.44781300 | -1.98833500 | -0.02900100 | H | 2.31386600  | 4.14267700  | 0.37307500  |
| H                      | -4.83774700 | -0.91918200 | 2.12477500  | C | 0.09300200  | 5.40484400  | 1.77900000  |
| H                      | -5.08099500 | -1.51659700 | -2.11398700 | H | 0.07875300  | 6.45892500  | 1.47864900  |
| Cu                     | -0.00004400 | 0.31985900  | -0.00016400 | H | -0.54524900 | 5.29712300  | 2.66141500  |
| H                      | 1.25584300  | -4.46257800 | 0.73676300  | H | 1.11103800  | 5.13842900  | 2.06892600  |
| H                      | -1.11702100 | -4.28169800 | 1.01990900  | C | -1.91961000 | 4.78344000  | 0.41877900  |
| C                      | 6.56502200  | -0.69737200 | -0.02624000 | H | -2.47209400 | 4.56391000  | 1.33704400  |
| H                      | 7.13802800  | -1.12472600 | 0.80192800  | H | -2.10270800 | 5.82878000  | 0.14779800  |
| H                      | 7.06448700  | -0.96835900 | -0.96144700 | H | -2.31555400 | 4.14180700  | -0.37301600 |
| H                      | 6.62044200  | 0.39427900  | 0.06692000  | H | 1.11860400  | -4.28137300 | -1.01992600 |
|                        |             |             |             | H | -1.25421300 | -4.46304600 | -0.73677000 |

L<sub>1</sub>-7

|    |             |             |             |   |             |             |             |
|----|-------------|-------------|-------------|---|-------------|-------------|-------------|
| C  | -0.40096800 | -1.14063200 | -1.27432100 | H | 0.81094400  | -4.34961800 | -1.13364200 |
| C  | -0.02026000 | -2.36847300 | -3.26751500 | H | 2.08176900  | -4.74683500 | 0.03059300  |
| C  | -1.52117700 | -2.05621800 | -3.15286000 | C | 2.25487100  | 0.33202300  | -3.09419800 |
| N  | -1.59339000 | -1.28535200 | -1.89074700 | H | 1.60039300  | 0.02273600  | -3.91697900 |
| N  | 0.52821300  | -1.75062300 | -2.03926000 | H | 1.67350000  | 1.00165700  | -2.45096500 |
| C  | -3.25883000 | 0.51635300  | -1.89700100 | H | 3.07661400  | 0.90899800  | -3.52716400 |
| C  | -2.85161600 | -0.75410000 | -1.44681900 | C | 0.70817200  | 0.01681500  | 2.29777300  |
| C  | -3.68489500 | -1.54629800 | -0.63806300 | N | 0.37261900  | -1.26769500 | 2.10230900  |
| C  | -4.92409000 | -1.02414800 | -0.25261600 | C | -0.87768200 | -1.72088700 | 2.58189000  |
| C  | -5.35042800 | 0.24339600  | -0.65822300 | C | -0.97890700 | -3.09568700 | 2.87265700  |
| C  | -4.50787800 | 0.99228500  | -1.48643800 | C | -2.00851900 | -0.90863700 | 2.81281700  |
| H  | -5.57021100 | -1.62755900 | 0.38042600  | C | -2.15142400 | -3.63644100 | 3.39466100  |
| H  | -4.83151800 | 1.97299600  | -1.82822100 | H | -0.10437700 | -3.71716000 | 2.70544500  |
| C  | 2.79316100  | -0.84958700 | -2.32244800 | C | -3.18232400 | -1.45935100 | 3.32695600  |
| C  | 4.16848500  | -0.99343100 | -2.12036900 | H | -1.97624500 | 0.15068000  | 2.57804100  |
| C  | 4.70427200  | -2.06530300 | -1.39796600 | C | -3.26294900 | -2.82110700 | 3.62738600  |
| C  | 3.82444200  | -3.01005400 | -0.86348300 | H | -2.19628100 | -4.69750800 | 3.62632100  |
| C  | 2.43890900  | -2.90968200 | -1.03549900 | H | -4.04195300 | -0.81513000 | 3.49289100  |
| C  | 1.93720600  | -1.82393000 | -1.77290400 | H | -4.17715500 | -3.24042400 | 4.03768900  |
| H  | 4.83847300  | -0.24626400 | -2.53988000 | B | 0.04836100  | 1.97221600  | 0.14164500  |
| H  | 4.22199500  | -3.84915700 | -0.29704500 | C | -0.34874300 | 4.23531100  | 0.49751000  |
| Cu | 0.02881200  | -0.04228000 | 0.33349100  | O | -0.32102100 | 2.91119500  | 1.09964600  |
| H  | -2.13755800 | -2.95863400 | -3.08425300 | C | 0.57237000  | 4.05062000  | -0.76448000 |
| H  | 0.19145200  | -3.44283100 | -3.27950000 | O | 0.44957300  | 2.62249600  | -1.02714900 |
| C  | -6.67865700 | 0.79937800  | -0.20123600 | C | -1.81460900 | 4.53484600  | 0.15068800  |
| H  | -6.55980500 | 1.41270000  | 0.70074500  | H | -2.41470700 | 4.45523100  | 1.06159400  |
| H  | -7.13196000 | 1.43617900  | -0.96734500 | H | -1.94106200 | 5.54317400  | -0.25702100 |
| H  | -7.38628500 | 0.00049300  | 0.03938500  | H | -2.20583400 | 3.81307800  | -0.57117900 |
| C  | 6.19612200  | -2.18173000 | -1.19049300 | C | 0.15616200  | 5.24736600  | 1.52558800  |
| H  | 6.74269000  | -2.05199000 | -2.13088100 | H | 1.14832400  | 4.98412900  | 1.89635300  |
| H  | 6.55829100  | -1.41058300 | -0.49993000 | H | 0.20132300  | 6.25463300  | 1.09664200  |
| H  | 6.46842300  | -3.15529800 | -0.77340400 | H | -0.52703000 | 5.27525000  | 2.37979800  |
| C  | -3.26680100 | -2.92739200 | -0.19649400 | C | 0.12809700  | 4.81456200  | -2.01145400 |
| H  | -4.01970100 | -3.36668700 | 0.46111600  | H | 0.15456600  | 5.89629400  | -1.83897500 |
| H  | -3.13521400 | -3.60238300 | -1.05114000 | H | 0.80616600  | 4.59036800  | -2.84045500 |
| H  | -2.32224100 | -2.90503900 | 0.35274700  | H | -0.88192500 | 4.53737500  | -2.31855800 |
| C  | -2.38436700 | 1.35288600  | -2.80038000 | C | 2.05739200  | 4.32435100  | -0.48729200 |
| H  | -1.45987200 | 1.65812500  | -2.30018300 | H | 2.40853000  | 3.76654100  | 0.38466700  |
| H  | -2.09660300 | 0.80984000  | -3.70793200 | H | 2.64338800  | 3.99719800  | -1.35108900 |
| H  | -2.91634300 | 2.25510000  | -3.11541000 | H | 2.25154900  | 5.38979100  | -0.32645300 |
| C  | 1.51267400  | -3.92307400 | -0.40838400 | C | 2.13852600  | 0.41815800  | 2.29955000  |
| H  | 0.92032200  | -3.45356100 | 0.38395000  | C | 3.16234000  | -0.48111500 | 1.96303600  |
|    |             |             |             | C | 2.48778300  | 1.71353800  | 2.71962000  |
|    |             |             |             | C | 4.49783600  | -0.08686500 | 2.03099700  |

|                           |             |             |             |   |             |             |             |
|---------------------------|-------------|-------------|-------------|---|-------------|-------------|-------------|
| H                         | 2.89609200  | -1.48714900 | 1.66097300  | H | 6.35088500  | -2.67461100 | 0.31582600  |
| C                         | 3.82390300  | 2.10239500  | 2.79137500  | C | -3.06942000 | -2.52381300 | 0.98130100  |
| H                         | 1.69844100  | 2.41317700  | 2.97921500  | H | -3.83558500 | -2.81246300 | 1.70435900  |
| C                         | 4.83676900  | 1.20390000  | 2.44354400  | H | -2.72336500 | -3.42919800 | 0.47130000  |
| H                         | 5.27864000  | -0.79716600 | 1.77254600  | H | -2.22497200 | -2.12435900 | 1.55067200  |
| H                         | 4.07681000  | 3.10520100  | 3.12562700  | C | -2.79680400 | 0.03376700  | -3.41507700 |
| H                         | 5.87908600  | 1.50491400  | 2.50290400  | H | -1.71310300 | 0.11901000  | -3.29603000 |
| H                         | 0.05828400  | 0.68519500  | 2.86846000  | H | -2.98096500 | -0.75497600 | -4.15639800 |
| H                         | 0.43939900  | -1.92596000 | -4.15758800 | H | -3.17038800 | 0.96732000  | -3.84359200 |
| H                         | -1.89567100 | -1.45715800 | -3.98916400 | C | 1.42885100  | -3.95154800 | 0.63772600  |
| <b>L<sub>1</sub>- TS8</b> |             |             |             | H | 0.84974000  | -3.26184300 | 1.26118500  |
| C                         | -0.49291300 | -1.54066900 | -1.01924600 | H | 0.71607600  | -4.58123400 | 0.09396500  |
| C                         | -0.20038100 | -3.33969200 | -2.52806900 | H | 2.01075500  | -4.59856600 | 1.29895000  |
| C                         | -1.70304800 | -3.03638800 | -2.39188100 | C | 2.09769900  | -0.69733900 | -3.21370700 |
| N                         | -1.71394200 | -1.84859000 | -1.51069500 | H | 1.32572700  | -1.18095400 | -3.82089000 |
| N                         | 0.40208800  | -2.39069900 | -1.56996800 | H | 1.64759500  | 0.18851600  | -2.75114900 |
| C                         | -3.48302000 | -0.26573000 | -2.10277600 | H | 2.89043800  | -0.35984800 | -3.88670900 |
| C                         | -2.94454200 | -1.18610400 | -1.18445900 | C | 0.72572300  | 1.05235100  | 1.74092900  |
| C                         | -3.61581100 | -1.50656300 | 0.01022200  | N | 0.50104800  | -0.26647800 | 2.23939800  |
| C                         | -4.82066000 | -0.85093300 | 0.28365100  | C | -0.62616300 | -0.48405800 | 3.03335000  |
| C                         | -5.37088000 | 0.08900100  | -0.59281500 | C | -0.65794100 | -1.68726400 | 3.78544800  |
| C                         | -4.69187400 | 0.36028700  | -1.78457600 | C | -1.74109700 | 0.38270700  | 3.17164200  |
| H                         | -5.33956600 | -1.08518600 | 1.20994600  | C | -1.72480200 | -2.00015800 | 4.61835200  |
| H                         | -5.11161400 | 1.07744000  | -2.48651500 | H | 0.19766400  | -2.35223400 | 3.70592800  |
| C                         | 2.65717800  | -1.61741000 | -2.15463800 | C | -2.80512300 | 0.05927400  | 4.01581500  |
| C                         | 4.03773700  | -1.68437800 | -1.93787000 | H | -1.78884100 | 1.30772900  | 2.60494100  |
| C                         | 4.59058600  | -2.47978200 | -0.92993300 | C | -2.81499900 | -1.12909600 | 4.74694400  |
| C                         | 3.72349800  | -3.21258700 | -0.11191100 | H | -1.70302200 | -2.92864500 | 5.18492700  |
| C                         | 2.33745600  | -3.18392600 | -0.29134200 | H | -3.64196600 | 0.75033000  | 4.09473700  |
| C                         | 1.81765900  | -2.38552200 | -1.32788200 | H | -3.64493000 | -1.37068600 | 5.40454700  |
| H                         | 4.69534800  | -1.09236500 | -2.57007300 | B | 0.23688200  | 1.82033200  | -0.03331200 |
| H                         | 4.13406700  | -3.82027000 | 0.69102700  | C | -0.62803000 | 3.76605900  | -0.92353600 |
| Cu                        | 0.00961500  | -0.26110500 | 0.28381800  | O | -0.71870100 | 2.79770100  | 0.15854900  |
| H                         | -2.25768100 | -3.85704900 | -1.92232900 | C | 0.82486800  | 3.51121300  | -1.49587400 |
| H                         | 0.05163800  | -4.36993900 | -2.25863100 | O | 1.09949700  | 2.14252600  | -1.06312100 |
| C                         | -6.65576900 | 0.80559500  | -0.25064400 | C | -1.74950200 | 3.43035600  | -1.91396300 |
| H                         | -6.46184500 | 1.67752900  | 0.38626600  | H | -2.70611200 | 3.44762200  | -1.38493700 |
| H                         | -7.16716700 | 1.16395900  | -1.14892400 | H | -1.79451600 | 4.15242100  | -2.73551200 |
| H                         | -7.34419300 | 0.15380400  | 0.29604200  | H | -1.61787700 | 2.43074600  | -2.33241900 |
| C                         | 6.08708000  | -2.56454600 | -0.74044100 | C | -0.85725400 | 5.15742900  | -0.33335400 |
| H                         | 6.50365900  | -3.43063000 | -1.27013700 | H | -0.15450800 | 5.37478500  | 0.47259300  |
| H                         | 6.59066700  | -1.67357000 | -1.12656500 | H | -0.75778200 | 5.93134100  | -1.10204000 |
|                           |             |             |             | H | -1.86961500 | 5.21644600  | 0.07665400  |
|                           |             |             |             | C | 0.93559400  | 3.56027700  | -3.01947800 |

|                        |             |             |             |    |             |             |             |
|------------------------|-------------|-------------|-------------|----|-------------|-------------|-------------|
| H                      | 0.69010300  | 4.55898500  | -3.39655100 | H  | 4.96424300  | -3.14482700 | 1.43921900  |
| H                      | 1.96278400  | 3.33146500  | -3.31786500 | Cu | -0.17330500 | -0.52048800 | 0.46051300  |
| H                      | 0.27480100  | 2.83609900  | -3.49940100 | H  | -1.00934600 | -4.84676100 | -1.53243100 |
| C                      | 1.90416500  | 4.40288300  | -0.87136900 | H  | 1.37570000  | -4.71467000 | -1.59344800 |
| H                      | 1.88397000  | 4.35627000  | 0.21909000  | C  | -6.55222600 | -1.51714100 | -0.05887500 |
| H                      | 2.88672100  | 4.04947900  | -1.19530200 | H  | -6.58521700 | -0.69829600 | 0.67012100  |
| H                      | 1.79215700  | 5.44600500  | -1.18399200 | H  | -7.08637600 | -1.18238800 | -0.95301400 |
| C                      | 2.18183200  | 1.45498900  | 1.79587700  | H  | -7.09953900 | -2.36168200 | 0.37076800  |
| C                      | 3.20479200  | 0.61178500  | 1.33937100  | C  | 6.57418600  | -1.31067600 | 0.22220800  |
| C                      | 2.53189700  | 2.68425200  | 2.36923800  | H  | 7.12048000  | -0.95202600 | -0.65531500 |
| C                      | 4.53906100  | 0.99748300  | 1.44499500  | H  | 6.59222500  | -0.50980200 | 0.97115500  |
| H                      | 2.95017700  | -0.35322200 | 0.91446300  | H  | 7.11910000  | -2.16311700 | 0.63914600  |
| C                      | 3.87042100  | 3.07027200  | 2.48064700  | C  | -2.35900200 | -4.08277000 | 1.09325800  |
| H                      | 1.74899400  | 3.33828400  | 2.74705200  | H  | -3.01802300 | -4.43687700 | 1.88972300  |
| C                      | 4.87961200  | 2.22884200  | 2.01416500  | H  | -2.00099400 | -4.96325500 | 0.54668800  |
| H                      | 5.31875800  | 0.33160300  | 1.08476900  | H  | -1.48542000 | -3.61629900 | 1.56077000  |
| H                      | 4.12084100  | 4.02381800  | 2.93810100  | C  | -2.38045800 | -0.84687000 | -2.82665600 |
| H                      | 5.92187600  | 2.52425500  | 2.09826000  | H  | -1.54662400 | -0.24106500 | -2.45589700 |
| H                      | 0.10686100  | 1.82602400  | 2.20387200  | H  | -1.96429500 | -1.55914100 | -3.54883200 |
| H                      | 0.17821400  | -3.15462600 | -3.54023900 | H  | -3.06602200 | -0.18925600 | -3.36692300 |
| H                      | -2.17894000 | -2.81377300 | -3.35100400 | C  | 2.40223000  | -3.98504200 | 1.18883900  |
| <b>L<sub>1</sub>-9</b> |             |             |             | H  | 1.50205500  | -3.55727800 | 1.64244000  |
| C                      | 0.00708900  | -2.08154300 | -0.60916700 | H  | 2.08501400  | -4.85613500 | 0.60294200  |
| C                      | 0.88938600  | -3.80694200 | -1.96292800 | H  | 3.04564200  | -4.34854300 | 1.99389600  |
| C                      | -0.64693900 | -3.90852400 | -1.96610000 | C  | 2.44341000  | -0.55582200 | -2.57193700 |
| N                      | -1.04240500 | -2.76066700 | -1.12242000 | H  | 1.75559500  | -1.18642000 | -3.14304900 |
| N                      | 1.13699000  | -2.67258500 | -1.04527800 | H  | 1.85987100  | 0.27271700  | -2.15316600 |
| C                      | -3.09341900 | -1.54236800 | -1.69190700 | H  | 3.17237600  | -0.13200100 | -3.26867900 |
| C                      | -2.42338500 | -2.46050500 | -0.86489200 | C  | 0.49387400  | 2.15507400  | 1.42463100  |
| C                      | -3.08379100 | -3.10936400 | 0.19432300  | N  | -0.49639800 | 1.05434000  | 1.43755100  |
| C                      | -4.43024200 | -2.80822700 | 0.41737200  | C  | -1.74374600 | 1.29129700  | 1.99525600  |
| C                      | -5.12117300 | -1.88218700 | -0.37040600 | C  | -2.58981800 | 0.18554600  | 2.28471000  |
| C                      | -4.43785700 | -1.26900200 | -1.42453400 | C  | -2.26405200 | 2.57305300  | 2.31874200  |
| H                      | -4.94690200 | -3.29739900 | 1.23987900  | C  | -3.84625900 | 0.34479200  | 2.85315300  |
| H                      | -4.96050200 | -0.54941800 | -2.05021800 | H  | -2.22196500 | -0.81377900 | 2.06272900  |
| C                      | 3.14339100  | -1.31741500 | -1.47260000 | C  | -3.52404100 | 2.71776100  | 2.90137100  |
| C                      | 4.47646900  | -1.03007800 | -1.16070700 | H  | -1.70385600 | 3.46651200  | 2.07250900  |
| C                      | 5.15018700  | -1.67468800 | -0.12104800 | C  | -4.33403600 | 1.61672100  | 3.17828800  |
| C                      | 4.45826500  | -2.63773300 | 0.62098500  | H  | -4.44631000 | -0.53889900 | 3.06087400  |
| C                      | 3.12780700  | -2.96167800 | 0.34807800  | H  | -3.87936900 | 3.72078700  | 3.12961500  |
| C                      | 2.48128800  | -2.29345600 | -0.70908800 | H  | -5.31213800 | 1.74145900  | 3.63352100  |
| H                      | 4.99729900  | -0.27490300 | -1.74480100 | B  | 0.32804700  | 2.88139600  | 0.02882100  |
|                        |             |             |             | C  | -0.71362000 | 4.20055000  | -1.52467500 |
|                        |             |             |             | O  | -0.43930100 | 4.01668100  | -0.11123000 |

|                         |             |             |             |    |             |             |             |
|-------------------------|-------------|-------------|-------------|----|-------------|-------------|-------------|
| C                       | 0.49158700  | 3.43553200  | -2.19223600 | C  | 1.12389500  | 4.98839800  | -0.40209500 |
| O                       | 0.81718700  | 2.43426100  | -1.18631500 | C  | 0.67551700  | 4.40414100  | -1.59036500 |
| C                       | -2.07569800 | 3.54710900  | -1.79719100 | H  | 0.74227800  | 5.17904900  | 1.70722100  |
| H                       | -2.82212500 | 4.00200700  | -1.14099500 | H  | 1.23475900  | 4.56827900  | -2.50844300 |
| H                       | -2.39328100 | 3.68713100  | -2.83524500 | C  | -4.31517700 | -1.27795800 | -1.44473000 |
| H                       | -2.05018400 | 2.47673400  | -1.57519700 | C  | -4.79581300 | -2.58295200 | -1.30026300 |
| C                       | -0.77831300 | 5.69836000  | -1.81677500 | C  | -5.11614700 | -3.11834200 | -0.04872200 |
| H                       | 0.12900400  | 6.21285500  | -1.49525400 | C  | -4.95121500 | -2.30962500 | 1.08021500  |
| H                       | -0.92613300 | 5.88299300  | -2.88628900 | C  | -4.47432500 | -0.99895400 | 0.98750300  |
| H                       | -1.62275000 | 6.13797000  | -1.27842700 | C  | -4.16116600 | -0.49406400 | -0.28740600 |
| C                       | 0.16160800  | 2.72814100  | -3.50515700 | H  | -4.91527700 | -3.19839000 | -2.18884200 |
| H                       | -0.15194900 | 3.45034600  | -4.26668700 | H  | -5.19155500 | -2.71075900 | 2.06190800  |
| H                       | 1.04928300  | 2.20982300  | -3.87988400 | Cu | -0.92283800 | 0.14502500  | 0.01648000  |
| H                       | -0.63318500 | 1.99110600  | -3.37814400 | H  | -3.92512500 | 3.96701100  | 0.03398300  |
| C                       | 1.74152700  | 4.30926400  | -2.36789500 | H  | -5.33767600 | 2.05026900  | 0.22864600  |
| H                       | 1.98889900  | 4.83676100  | -1.44240800 | C  | 2.34995400  | 5.87044800  | -0.38322100 |
| H                       | 2.58846400  | 3.66883000  | -2.62989000 | H  | 2.07397300  | 6.93180900  | -0.41921700 |
| H                       | 1.61091700  | 5.04940600  | -3.16332700 | H  | 2.93556600  | 5.71911700  | 0.52865700  |
| C                       | 1.89413500  | 1.68925900  | 1.81623700  | H  | 2.99880400  | 5.67145100  | -1.24071500 |
| C                       | 2.05908500  | 0.73862300  | 2.83599000  | C  | -5.59267500 | -4.54513200 | 0.08485600  |
| C                       | 3.04353000  | 2.27302700  | 1.26751800  | H  | -6.10043400 | -4.88534300 | -0.82243400 |
| C                       | 3.32856400  | 0.39405400  | 3.29883300  | H  | -4.74820300 | -5.22257700 | 0.26126800  |
| H                       | 1.17274100  | 0.28144800  | 3.26488400  | H  | -6.28257900 | -4.66077000 | 0.92618100  |
| C                       | 4.31733200  | 1.93487800  | 1.73171800  | C  | -1.49214600 | 3.68966900  | 2.06595100  |
| H                       | 2.94526000  | 3.00182900  | 0.46777800  | H  | -1.02374000 | 4.22264700  | 2.89667900  |
| C                       | 4.46567300  | 0.99568400  | 2.75251600  | H  | -2.54026300 | 4.00659800  | 2.01511400  |
| H                       | 3.43086500  | -0.33649600 | 4.09755500  | H  | -1.48777000 | 2.62120700  | 2.30632700  |
| H                       | 5.19296400  | 2.40857400  | 1.29466600  | C  | -0.89937300 | 2.95425600  | -2.92913700 |
| H                       | 5.45462300  | 0.73900400  | 3.12364500  | H  | -0.81803700 | 1.86331000  | -2.86690500 |
| H                       | 0.21465200  | 2.88338800  | 2.20200300  | H  | -1.93930700 | 3.18618900  | -3.18474400 |
| H                       | 1.30178400  | -3.58528100 | -2.95368300 | H  | -0.27079500 | 3.29160000  | -3.75692900 |
| H                       | -1.07662100 | -3.81379500 | -2.96841800 | C  | -4.27088300 | -0.16933800 | 2.23271000  |
| <b>L<sub>1</sub>-10</b> |             |             |             | H  | -3.20861500 | 0.05011500  | 2.38737000  |
| C                       | -2.41608300 | 1.25645400  | -0.31099800 | H  | -4.79463500 | 0.79184900  | 2.18168600  |
| C                       | -4.64472500 | 1.98180400  | -0.61708400 | H  | -4.63584200 | -0.70091100 | 3.11483100  |
| C                       | -3.70291900 | 3.19869600  | -0.71313300 | C  | -3.94286100 | -0.74572200 | -2.80802200 |
| N                       | -2.37589400 | 2.59639900  | -0.46156200 | H  | -4.49811800 | 0.16397900  | -3.06394500 |
| N                       | -3.70076600 | 0.86068600  | -0.41712000 | H  | -2.87724200 | -0.49676600 | -2.85550900 |
| C                       | -0.47041100 | 3.60319900  | -1.63464900 | H  | -4.14963700 | -1.48883500 | -3.58198900 |
| C                       | -1.17979500 | 3.39175300  | -0.43947500 | C  | 1.85577800  | -0.15385200 | 0.58620100  |
| C                       | -0.75364600 | 3.95718400  | 0.77650600  | N  | 0.59091600  | -0.87380100 | 0.37585500  |
| C                       | 0.39829400  | 4.74836000  | 0.76987900  | C  | 0.59130300  | -2.25163700 | 0.47107500  |
|                         |             |             |             | C  | 1.67841300  | -3.01609000 | 0.97211500  |
|                         |             |             |             | C  | -0.55147400 | -2.98768400 | 0.05511100  |

|   |             |             |             |
|---|-------------|-------------|-------------|
| C | 1.61984300  | -4.41040300 | 1.03169800  |
| H | 2.56085300  | -2.51735800 | 1.35743900  |
| C | -0.59959600 | -4.37225600 | 0.12833800  |
| H | -1.40135300 | -2.43850100 | -0.34556000 |
| C | 0.48892100  | -5.11004000 | 0.61341500  |
| H | 2.47523300  | -4.95200200 | 1.43066900  |
| H | -1.49689000 | -4.88715500 | -0.20949700 |
| H | 0.45013400  | -6.19399100 | 0.66580800  |
| B | 3.01737600  | -0.69830700 | -0.36571900 |
| C | 4.06296500  | -1.15989600 | -2.34999400 |
| O | 2.78419600  | -0.96726800 | -1.69311600 |
| C | 5.02903300  | -1.47396200 | -1.13833500 |
| O | 4.34071500  | -0.84385900 | -0.02135000 |
| C | 3.91392200  | -2.28743600 | -3.37062100 |
| H | 3.20136900  | -1.98646400 | -4.14420000 |
| H | 4.87062300  | -2.50664800 | -3.85709200 |
| H | 3.53766200  | -3.19973700 | -2.90540600 |
| C | 4.39117600  | 0.15735900  | -3.06688500 |
| H | 4.48161600  | 0.98369000  | -2.35607500 |
| H | 5.32095100  | 0.08837000  | -3.63999300 |
| H | 3.57738300  | 0.39493900  | -3.75787000 |
| C | 5.13145300  | -2.96911100 | -0.80769000 |
| H | 5.68515700  | -3.51476000 | -1.57813500 |
| H | 5.66189200  | -3.08318600 | 0.14205200  |
| H | 4.14262800  | -3.42037900 | -0.69588800 |
| C | 6.42699800  | -0.86551200 | -1.24311800 |
| H | 6.39100800  | 0.22083900  | -1.34421700 |
| H | 6.99440800  | -1.10019300 | -0.33794300 |
| H | 6.97051700  | -1.27873100 | -2.09954900 |
| C | 2.25176200  | 0.09470700  | 2.04749200  |
| C | 3.37954500  | 0.87508200  | 2.34991000  |
| C | 1.47895600  | -0.38581400 | 3.11187300  |
| C | 3.72302300  | 1.16499200  | 3.66951700  |
| H | 3.99997100  | 1.25198600  | 1.54131500  |
| C | 1.82353200  | -0.10055000 | 4.43625600  |
| H | 0.60583600  | -0.98999800 | 2.89189600  |
| C | 2.94517800  | 0.67700300  | 4.72291700  |
| H | 4.60163400  | 1.77122400  | 3.87656500  |
| H | 1.21155000  | -0.49190500 | 5.24541600  |
| H | 3.21356900  | 0.89865500  | 5.75247600  |
| H | 1.68888600  | 0.85642200  | 0.17329200  |
| H | -3.72596500 | 3.67320300  | -1.70031700 |
| H | -5.23704700 | 1.83035200  | -1.52477200 |

### L<sub>1</sub>- TS11

|    |             |             |             |
|----|-------------|-------------|-------------|
| C  | 1.91053300  | 1.51740400  | -0.16169400 |
| C  | 3.11442800  | 3.52513100  | 0.13058200  |
| C  | 4.10982100  | 2.36499600  | -0.04811700 |
| N  | 3.21550500  | 1.18621500  | -0.08938300 |
| N  | 1.81175300  | 2.85964600  | -0.09128500 |
| C  | 3.91608000  | -0.71827500 | -1.47735200 |
| C  | 3.73910500  | -0.14700200 | -0.20401700 |
| C  | 4.09678100  | -0.83942800 | 0.96653400  |
| C  | 4.63869800  | -2.12177200 | 0.83753900  |
| C  | 4.82645600  | -2.72230300 | -0.41134000 |
| C  | 4.46072600  | -2.00366600 | -1.55374000 |
| H  | 4.91618500  | -2.66585500 | 1.73734100  |
| H  | 4.59666600  | -2.45542700 | -2.53339600 |
| C  | 0.15384000  | 4.21888000  | -1.27165500 |
| C  | -1.02357400 | 4.96997500  | -1.24414400 |
| C  | -1.77771400 | 5.11741900  | -0.07461000 |
| C  | -1.32375800 | 4.49126500  | 1.08881800  |
| C  | -0.15167600 | 3.72631300  | 1.11391500  |
| C  | 0.58063000  | 3.60147300  | -0.08030400 |
| H  | -1.36272600 | 5.44701000  | -2.16072200 |
| H  | -1.89725100 | 4.59486700  | 2.00704800  |
| Cu | 0.43995600  | 0.33657300  | -0.32933900 |
| H  | 4.67870100  | 2.43838000  | -0.98252400 |
| H  | 3.14699100  | 3.95752700  | 1.13778900  |
| C  | 5.38139400  | -4.12249600 | -0.52391100 |
| H  | 6.01048600  | -4.37514200 | 0.33460700  |
| H  | 4.57277600  | -4.86250300 | -0.56608000 |
| H  | 5.97909000  | -4.24432000 | -1.43231600 |
| C  | -3.06491000 | 5.90768800  | -0.07824300 |
| H  | -3.26344500 | 6.35419800  | 0.90055200  |
| H  | -3.04039000 | 6.71052900  | -0.82110900 |
| H  | -3.91921300 | 5.26402500  | -0.32153400 |
| C  | 3.88779200  | -0.23142700 | 2.33315400  |
| H  | 4.49245100  | 0.67163400  | 2.48003300  |
| H  | 2.84199800  | 0.05320400  | 2.48722000  |
| H  | 4.16499900  | -0.94068600 | 3.11698500  |
| C  | 3.50763500  | 0.01201200  | -2.73439900 |
| H  | 2.41774400  | 0.10395400  | -2.79800700 |
| H  | 3.92112500  | 1.02551500  | -2.77717600 |
| H  | 3.84880400  | -0.52703600 | -3.62138900 |
| C  | 0.26305400  | 3.02915600  | 2.38744200  |
| H  | -0.15566600 | 3.54266900  | 3.25760800  |

|   |             |             |             |                         |             |             |             |
|---|-------------|-------------|-------------|-------------------------|-------------|-------------|-------------|
| H | -0.10768700 | 1.99654800  | 2.39697000  | H                       | -3.50423400 | -2.80204900 | -0.34093400 |
| H | 1.34972100  | 2.99170700  | 2.50707900  | C                       | -5.71562200 | -0.10652600 | -2.03018300 |
| C | 0.92608400  | 4.05813000  | -2.55970500 | H                       | -4.19324800 | 1.29135100  | -1.43167400 |
| H | 1.92224100  | 4.51388800  | -2.50567000 | C                       | -6.12295600 | -1.44087800 | -2.03909000 |
| H | 1.06723000  | 3.00130700  | -2.80830300 | H                       | -5.62354700 | -3.44814100 | -1.43187800 |
| H | 0.39494000  | 4.53234500  | -3.38857900 | H                       | -6.33417200 | 0.65746400  | -2.49457900 |
| C | -2.42321100 | -0.25460400 | -0.13448300 | H                       | -7.06011400 | -1.72611900 | -2.50954200 |
| N | -1.04631800 | -0.81334600 | -0.52556100 | H                       | -2.38170300 | 0.83719100  | -0.14049900 |
| C | -0.89668000 | -1.79517300 | -1.53146700 | H                       | 3.26737400  | 4.33364700  | -0.58918200 |
| C | 0.00116800  | -2.86304900 | -1.32054600 | H                       | 4.82342200  | 2.28442900  | 0.77614300  |
| C | -1.54726200 | -1.73108300 | -2.78304200 |                         |             |             |             |
| C | 0.24682100  | -3.81041500 | -2.31284200 | <b>L<sub>1</sub>-12</b> |             |             |             |
| H | 0.50309700  | -2.93253300 | -0.36112600 | C                       | 1.91888800  | 1.55688900  | -0.11242600 |
| C | -1.30651200 | -2.68986000 | -3.76616300 | C                       | 3.09461700  | 3.55000800  | 0.34326300  |
| H | -2.23700500 | -0.91917300 | -2.98173100 | C                       | 4.10516900  | 2.40127600  | 0.15542600  |
| C | -0.40807100 | -3.73654900 | -3.54452200 | N                       | 3.22271900  | 1.23185400  | -0.05703000 |
| H | 0.94637700  | -4.61966100 | -2.11579700 | N                       | 1.80057400  | 2.88508400  | 0.07049300  |
| H | -1.82337800 | -2.61117800 | -4.71974700 | C                       | 4.13425900  | -0.54376700 | -1.48661600 |
| H | -0.22429300 | -4.48001300 | -4.31500300 | C                       | 3.75306100  | -0.09504500 | -0.20916600 |
| B | -1.88807000 | -0.94112100 | 1.15781600  | C                       | 3.90962700  | -0.90199600 | 0.93122700  |
| C | -1.56084300 | -2.47697000 | 2.83926500  | C                       | 4.47064100  | -2.17268500 | 0.76754500  |
| O | -2.25829300 | -2.21763900 | 1.60516800  | C                       | 4.86611500  | -2.65056000 | -0.48536100 |
| C | -1.32330000 | -1.02142400 | 3.39449900  | C                       | 4.68956300  | -1.82138000 | -1.59816300 |
| O | -1.19340100 | -0.24595900 | 2.18476500  | H                       | 4.59757500  | -2.80523300 | 1.64291400  |
| C | -2.44716400 | -3.36878100 | 3.70985800  | H                       | 4.98563800  | -2.17947300 | -2.58134300 |
| H | -2.56422900 | -4.34589600 | 3.23135900  | C                       | 0.14109000  | 4.32507000  | -1.01036500 |
| H | -2.00065400 | -3.52762800 | 4.69779900  | C                       | -1.05301400 | 5.04714900  | -0.93554900 |
| H | -3.44222600 | -2.93906000 | 3.83887600  | C                       | -1.83238400 | 5.06607900  | 0.22581700  |
| C | -0.24925200 | -3.20702700 | 2.51210800  | C                       | -1.38742000 | 4.33956900  | 1.33406900  |
| H | 0.41349500  | -2.57255200 | 1.91821800  | C                       | -0.20004800 | 3.59951900  | 1.31135700  |
| H | 0.28131100  | -3.51557000 | 3.41904600  | C                       | 0.55716500  | 3.60449400  | 0.12475000  |
| H | -0.47912600 | -4.10056400 | 1.92517200  | H                       | -1.38472600 | 5.60345400  | -1.80905800 |
| C | -2.53794900 | -0.47359000 | 4.16202700  | H                       | -1.98058500 | 4.34345400  | 2.24554600  |
| H | -2.66800500 | -0.96349900 | 5.13255300  | Cu                      | 0.46636900  | 0.35972000  | -0.32763700 |
| H | -2.39362000 | 0.59710800  | 4.33479600  | H                       | 4.74189700  | 2.24623300  | 1.03136700  |
| H | -3.45545700 | -0.60156400 | 3.58135800  | H                       | 3.09932800  | 3.95573900  | 1.36111800  |
| C | -0.05891400 | -0.84826900 | 4.23689100  | C                       | 5.44031000  | -4.03881600 | -0.64083500 |
| H | 0.83842500  | -1.10515800 | 3.67055000  | H                       | 5.90364500  | -4.38723700 | 0.28669700  |
| H | 0.02999700  | 0.19382900  | 4.56075200  | H                       | 4.65696700  | -4.75927600 | -0.90627200 |
| H | -0.09458700 | -1.47470600 | 5.13519700  | H                       | 6.19443300  | -4.07389100 | -1.43301000 |
| C | -3.68302600 | -0.70760200 | -0.81431000 | C                       | -3.13661100 | 5.82639700  | 0.27317100  |
| C | -4.11221200 | -2.04728800 | -0.82527800 | H                       | -3.31512100 | 6.25336000  | 1.26477800  |
| C | -4.50750300 | 0.24968600  | -1.42851700 | H                       | -3.15312300 | 6.64071800  | -0.45691500 |
| C | -5.31411200 | -2.40609600 | -1.43406600 |                         |             |             |             |

|   |             |             |             |                            |             |             |             |
|---|-------------|-------------|-------------|----------------------------|-------------|-------------|-------------|
| H | -3.98318500 | 5.16638700  | 0.04765900  | H                          | -2.82525800 | -1.21975900 | 4.75830900  |
| C | 3.45625700  | -0.43349300 | 2.29326600  | H                          | -2.29769500 | 0.32166700  | 4.05648700  |
| H | 3.86760000  | 0.54873300  | 2.55094500  | H                          | -3.33650100 | -0.76276100 | 3.11864400  |
| H | 2.36451500  | -0.34870500 | 2.33722100  | C                          | -0.11731200 | -1.34210600 | 4.26942100  |
| H | 3.76988000  | -1.13855700 | 3.06719600  | H                          | 0.82782300  | -1.68346400 | 3.84239500  |
| C | 3.92501200  | 0.31001400  | -2.71465900 | H                          | 0.02456500  | -0.31853800 | 4.63239900  |
| H | 2.86307200  | 0.53496700  | -2.86165900 | H                          | -0.35513500 | -1.97295300 | 5.13330300  |
| H | 4.45326400  | 1.26831500  | -2.64958600 | C                          | -3.65331600 | -0.56129700 | -0.77691500 |
| H | 4.28493300  | -0.20540800 | -3.60825200 | C                          | -4.10896200 | -1.88579500 | -0.92772000 |
| C | 0.21249300  | 2.79678400  | 2.52187400  | C                          | -4.45568300 | 0.46888100  | -1.30056600 |
| H | -0.27784100 | 3.18297900  | 3.41974000  | C                          | -5.30906100 | -2.15705500 | -1.58304500 |
| H | -0.07614500 | 1.74351200  | 2.41075800  | H                          | -3.52480500 | -2.69622300 | -0.50808100 |
| H | 1.29353600  | 2.82578300  | 2.68964000  | C                          | -5.66457300 | 0.19830200  | -1.94223700 |
| C | 0.94205400  | 4.30914500  | -2.29110800 | H                          | -4.12234600 | 1.49947700  | -1.19600600 |
| H | 1.90295600  | 4.82769700  | -2.18507500 | C                          | -6.09543700 | -1.12050600 | -2.09239300 |
| H | 1.16078300  | 3.28588600  | -2.61256800 | H                          | -5.63785000 | -3.18792800 | -1.68819300 |
| H | 0.39255800  | 4.80559200  | -3.09461900 | H                          | -6.26490500 | 1.01714100  | -2.33128500 |
| C | -2.40802800 | -0.20606200 | -0.04544600 | H                          | -7.03283000 | -1.33846900 | -2.59713500 |
| N | -1.03074000 | -0.82689600 | -0.47026100 | H                          | -2.29787600 | 0.87350200  | 0.05480000  |
| C | -0.93752100 | -1.71176900 | -1.58656400 | H                          | 4.75568100  | 2.54926100  | -0.71328100 |
| C | -0.36038500 | -2.98271500 | -1.43555600 | H                          | 3.25926000  | 4.37832800  | -0.35145400 |
| C | -1.36498800 | -1.31422500 | -2.86569600 |                            |             |             |             |
| C | -0.19666100 | -3.82166200 | -2.53868400 | <b>L<sub>1</sub>- TS13</b> |             |             |             |
| H | -0.04952800 | -3.30256100 | -0.44836200 | C                          | -1.74754000 | 1.63425200  | 0.04877000  |
| C | -1.20551800 | -2.16040400 | -3.96148100 | C                          | -3.55136000 | 2.84490900  | 0.96425700  |
| H | -1.83011100 | -0.34133300 | -2.98773600 | C                          | -2.33959500 | 3.78507600  | 0.80982400  |
| C | -0.61661600 | -3.41837400 | -3.80751500 | N                          | -1.29630900 | 2.87990700  | 0.27642700  |
| H | 0.25324000  | -4.80182400 | -2.40095600 | N                          | -3.04060400 | 1.56945400  | 0.41201700  |
| H | -1.54517400 | -1.83453700 | -4.94132300 | C                          | 0.31819100  | 3.83753400  | -1.30380400 |
| H | -0.49376000 | -4.07629900 | -4.66317500 | C                          | 0.03161000  | 3.35013700  | -0.01549200 |
| B | -1.61653600 | -1.14774300 | 0.96596700  | C                          | 1.00206400  | 3.34251900  | 1.00251700  |
| C | -1.53567400 | -2.79245800 | 2.61143000  | C                          | 2.27708500  | 3.82993100  | 0.69676200  |
| O | -2.07039800 | -2.45910700 | 1.32503500  | C                          | 2.60269100  | 4.31109100  | -0.57525300 |
| C | -1.24480300 | -1.37411900 | 3.23629100  | C                          | 1.60830200  | 4.31082200  | -1.55896700 |
| O | -0.84713800 | -0.61716000 | 2.08337000  | H                          | 3.03713200  | 3.82535000  | 1.47413600  |
| C | -2.57276700 | -3.63051200 | 3.36384100  | H                          | 1.84145400  | 4.68709700  | -2.55220600 |
| H | -2.71308700 | -4.58744700 | 2.85117100  | C                          | -4.65044400 | 0.16664400  | -0.79008900 |
| H | -2.24825000 | -3.84134300 | 4.38935400  | C                          | -5.46819300 | -0.96563800 | -0.81849000 |
| H | -3.54035500 | -3.12650100 | 3.39752100  | C                          | -5.52372700 | -1.86278500 | 0.25457400  |
| C | -0.25165500 | -3.61792700 | 2.41507400  | C                          | -4.73695000 | -1.60024600 | 1.37901900  |
| H | 0.52036000  | -3.02567600 | 1.91536600  | C                          | -3.89641200 | -0.48326700 | 1.45558200  |
| H | 0.15285000  | -3.98517100 | 3.36470600  | C                          | -3.86362300 | 0.39188900  | 0.35553500  |
| H | -0.48178100 | -4.48307500 | 1.78587100  | H                          | -6.07845800 | -1.15008400 | -1.69959500 |
| C | -2.50921700 | -0.72849200 | 3.83214600  |                            |             |             |             |



|    |             |             |             |              |             |             |             |
|----|-------------|-------------|-------------|--------------|-------------|-------------|-------------|
| H  | -4.77202500 | -2.28339000 | 2.22426500  | C            | -0.00772500 | -2.06376100 | -2.52992600 |
| Cu | -0.72872200 | 0.22416500  | -0.68843100 | O            | 0.32923200  | -1.12345100 | -1.47262100 |
| H  | -2.01693600 | 4.22383500  | 1.75833500  | C            | 2.39975800  | -2.10214200 | -3.48741300 |
| H  | -3.85268100 | 2.70984600  | 2.00817800  | H            | 3.36410700  | -2.60009900 | -3.35630400 |
| C  | 4.00035800  | 4.79173000  | -0.88475700 | H            | 2.15568100  | -2.09580800 | -4.55516800 |
| H  | 4.46430500  | 5.26204200  | -0.01269800 | H            | 2.51025400  | -1.07044000 | -3.14342200 |
| H  | 4.64297400  | 3.95409700  | -1.18219700 | C            | 1.19372500  | -4.28355300 | -3.18555400 |
| H  | 4.00393500  | 5.51452700  | -1.70579600 | H            | 0.56230800  | -4.88704900 | -2.53050500 |
| C  | -6.39449800 | -3.09491700 | 0.18701000  | H            | 0.76794600  | -4.29089200 | -4.19530400 |
| H  | -7.29841800 | -2.91530400 | -0.40282900 | H            | 2.17772900  | -4.75916500 | -3.23024700 |
| H  | -5.85863200 | -3.92811400 | -0.28406000 | C            | -0.41892800 | -1.28544600 | -3.77839000 |
| H  | -6.69782300 | -3.42575000 | 1.18439200  | H            | -0.56684800 | -1.96384200 | -4.62550500 |
| C  | 0.70926200  | 2.79456100  | 2.37868200  | H            | -1.36651800 | -0.76204700 | -3.60473800 |
| H  | -0.24075800 | 3.16006100  | 2.78148200  | H            | 0.33582300  | -0.54610400 | -4.05298200 |
| H  | 0.65979700  | 1.69958200  | 2.37183800  | C            | -1.16433900 | -2.94401600 | -2.03931300 |
| H  | 1.49825100  | 3.07869700  | 3.07925400  | H            | -0.86313700 | -3.52089900 | -1.16165800 |
| C  | -0.72299400 | 3.83380200  | -2.39849500 | H            | -2.01556300 | -2.31183000 | -1.76339100 |
| H  | -1.00436900 | 2.81163500  | -2.67588800 | H            | -1.49835700 | -3.63807400 | -2.81712100 |
| H  | -1.64227800 | 4.34916000  | -2.09845600 | C            | 3.93319600  | -0.90402200 | 0.32388000  |
| H  | -0.34173800 | 4.32977500  | -3.29433800 | C            | 4.43768800  | -2.15801500 | 0.71341900  |
| C  | -3.03543900 | -0.26972900 | 2.67729000  | C            | 4.85941700  | 0.12626000  | 0.08331300  |
| H  | -2.96085700 | 0.78452400  | 2.95861700  | C            | 5.80883000  | -2.36802500 | 0.85033400  |
| H  | -3.43900500 | -0.81788800 | 3.53218500  | H            | 3.74015800  | -2.96722500 | 0.90424700  |
| H  | -2.01543700 | -0.63713300 | 2.51439600  | C            | 6.23195300  | -0.08488600 | 0.21424800  |
| C  | -4.60929100 | 1.11032600  | -1.96893600 | H            | 4.48932800  | 1.10771300  | -0.20893100 |
| H  | -4.94455700 | 2.11912100  | -1.70053200 | C            | 6.71745100  | -1.33575300 | 0.60088800  |
| H  | -3.59478800 | 1.20685900  | -2.37005100 | H            | 6.17171300  | -3.34683000 | 1.15516800  |
| H  | -5.25738100 | 0.75214100  | -2.77243900 | H            | 6.92414100  | 0.73182100  | 0.02136600  |
| C  | 2.47792200  | -0.65737100 | 0.12326900  | H            | 7.78564100  | -1.50287800 | 0.70978000  |
| N  | 1.49443700  | -1.50170100 | 0.80271500  | H            | 2.23592300  | 0.41552200  | 0.11242900  |
| C  | 1.13232800  | -1.64657900 | 2.11269900  | H            | -2.52417700 | 4.60288800  | 0.10524200  |
| C  | 0.12598200  | -2.57195800 | 2.48329400  | H            | -4.42678500 | 3.18222600  | 0.40129700  |
| C  | 1.73646300  | -0.88166600 | 3.13771000  |              |             |             |             |
| C  | -0.25335500 | -2.71360700 | 3.81521900  | <b>L1-14</b> |             |             |             |
| H  | -0.32756400 | -3.18546500 | 1.70971600  | C            | -1.57640500 | 1.66195100  | -0.36317100 |
| C  | 1.34207700  | -1.03597200 | 4.46540900  | C            | -3.31054300 | 3.25309300  | -0.25125200 |
| H  | 2.53428900  | -0.19453900 | 2.87349500  | C            | -1.98304100 | 3.97254000  | -0.54877700 |
| C  | 0.34336600  | -1.94626800 | 4.82230100  | N            | -0.99655200 | 2.87146400  | -0.45801700 |
| H  | -1.02179400 | -3.43991800 | 4.07187000  | N            | -2.91092400 | 1.82843100  | -0.29107000 |
| H  | 1.83143100  | -0.44163200 | 5.23406600  | C            | 0.99559900  | 2.97854300  | -1.89609300 |
| H  | 0.04661700  | -2.06613700 | 5.85995000  | C            | 0.41253000  | 3.11231100  | -0.62342800 |
| B  | 1.47458700  | -1.70686500 | -0.63123300 | C            | 1.16774400  | 3.51512400  | 0.49362700  |
| C  | 1.34989800  | -2.85786000 | -2.65070300 | C            | 2.53101600  | 3.76121100  | 0.31132100  |
| O  | 1.79227400  | -2.92955800 | -1.30089300 |              |             |             |             |

|    |             |             |             |   |             |             |             |
|----|-------------|-------------|-------------|---|-------------|-------------|-------------|
| C  | 3.15217900  | 3.61548200  | -0.93377600 | C | -0.54035600 | -1.19285400 | 4.21774400  |
| C  | 2.36515700  | 3.23346700  | -2.02448200 | H | -0.25904800 | -2.67248400 | 2.67395100  |
| H  | 3.12614900  | 4.06336500  | 1.16957700  | C | 0.98795000  | 0.66411400  | 4.18931700  |
| H  | 2.82715900  | 3.12692700  | -3.00295700 | H | 2.46584000  | 0.65136100  | 2.61548500  |
| C  | -4.56285200 | 0.29078500  | -1.23994100 | C | -0.09522000 | 0.00846400  | 4.78225700  |
| C  | -5.50316500 | -0.72596100 | -1.05344700 | H | -1.37250200 | -1.72807300 | 4.67030600  |
| C  | -5.76722100 | -1.26429700 | 0.21101600  | H | 1.36328100  | 1.58831100  | 4.62386700  |
| C  | -5.05825700 | -0.76194200 | 1.30598600  | H | -0.57106200 | 0.41416700  | 5.67019400  |
| C  | -4.10618300 | 0.25552700  | 1.17339600  | B | 1.45367600  | -2.08940200 | 0.04376200  |
| C  | -3.86742600 | 0.77038100  | -0.11376700 | C | 0.91182700  | -3.65284900 | -1.59435900 |
| H  | -6.03929700 | -1.10929200 | -1.91846900 | O | 1.68227900  | -3.42070000 | -0.42402200 |
| H  | -5.24738900 | -1.17152000 | 2.29537800  | C | -0.41548500 | -2.86139500 | -1.29629200 |
| Cu | -0.70721600 | -0.01608800 | -0.40109400 | O | 0.11906000  | -1.69930600 | -0.59345900 |
| H  | -1.75336200 | 4.76106400  | 0.17171100  | C | 1.66672200  | -3.09663300 | -2.81757200 |
| H  | -3.71270600 | 3.50136900  | 0.73767400  | H | 2.66416800  | -3.54353700 | -2.83516700 |
| C  | 4.63871400  | 3.83092400  | -1.08154100 | H | 1.16467300  | -3.33355800 | -3.76189500 |
| H  | 4.98830300  | 4.65753800  | -0.45527800 | H | 1.79127600  | -2.01291900 | -2.74460700 |
| H  | 5.18599300  | 2.93197800  | -0.77303900 | C | 0.71502700  | -5.16276200 | -1.75388200 |
| H  | 4.91289900  | 4.04698000  | -2.11807100 | H | 0.31256900  | -5.60888700 | -0.84249400 |
| C  | -6.81185600 | -2.34008700 | 0.39133700  | H | 0.04656000  | -5.39702900 | -2.59018200 |
| H  | -7.80158100 | -1.90156200 | 0.57028100  | H | 1.68323300  | -5.63094100 | -1.95348100 |
| H  | -6.89256900 | -2.97239400 | -0.49766800 | C | -1.18754000 | -2.39681100 | -2.52986200 |
| H  | -6.58093100 | -2.98221800 | 1.24599200  | H | -1.48668600 | -3.25579400 | -3.14018400 |
| C  | 0.54834800  | 3.64766000  | 1.86400200  | H | -2.10158100 | -1.87004400 | -2.23254800 |
| H  | -0.34801700 | 4.27719000  | 1.85952200  | H | -0.58596600 | -1.72816200 | -3.14953400 |
| H  | 0.26428600  | 2.66928100  | 2.26563500  | C | -1.34607600 | -3.60640900 | -0.33134100 |
| H  | 1.26030800  | 4.09485400  | 2.56212700  | H | -0.78677800 | -3.98200700 | 0.52841200  |
| C  | 0.18762600  | 2.54927900  | -3.09851700 | H | -2.12099500 | -2.92247800 | 0.02993400  |
| H  | -0.09862200 | 1.49347500  | -3.02822800 | H | -1.84051000 | -4.45034900 | -0.82297800 |
| H  | -0.73750500 | 3.12615600  | -3.20402700 | C | 3.98879200  | -1.00033400 | 0.22932400  |
| H  | 0.76696700  | 2.67565300  | -4.01633800 | C | 4.73052600  | -1.92074900 | 0.98812400  |
| C  | -3.34830100 | 0.74586500  | 2.38380200  | C | 4.68815800  | -0.18770200 | -0.68253600 |
| H  | -3.24349100 | 1.83501500  | 2.39451400  | C | 6.11398000  | -2.02179900 | 0.84089300  |
| H  | -3.86133200 | 0.45021900  | 3.30222500  | H | 4.20114200  | -2.55209100 | 1.69481500  |
| H  | -2.33797800 | 0.32336100  | 2.42631600  | C | 6.07077200  | -0.29127200 | -0.83227100 |
| C  | -4.29391100 | 0.83850600  | -2.62195900 | H | 4.13172900  | 0.52873000  | -1.28422700 |
| H  | -4.58956200 | 1.89079400  | -2.71159600 | C | 6.79599900  | -1.21007800 | -0.06859500 |
| H  | -3.23089000 | 0.78076000  | -2.87697100 | H | 6.66450000  | -2.74064300 | 1.44345600  |
| H  | -4.85361200 | 0.27782800  | -3.37447200 | H | 6.58463400  | 0.34576100  | -1.54918800 |
| C  | 2.50978700  | -0.89589500 | 0.33172000  | H | 7.87360200  | -1.29199900 | -0.18193000 |
| N  | 1.80862600  | -1.63789100 | 1.39974400  | H | 2.14584300  | 0.12990500  | 0.17478200  |
| C  | 1.17414100  | -1.07077600 | 2.48002700  | H | -1.95687600 | 4.41241600  | -1.55250800 |
| C  | 0.07509100  | -1.72612800 | 3.08863900  | H | -4.08510800 | 3.46028200  | -0.99428800 |
| C  | 1.61164300  | 0.14530600  | 3.05505300  |   |             |             |             |

**L<sub>1</sub>- TS15**

|    |             |             |             |   |             |             |             |
|----|-------------|-------------|-------------|---|-------------|-------------|-------------|
| C  | 0.96378100  | 1.93643600  | 0.10283500  | H | -2.32963700 | 2.57950200  | 3.31445300  |
| C  | 0.92110400  | 4.23813100  | 0.63698000  | H | -0.67988900 | 2.36450100  | 2.71402600  |
| C  | 2.36594000  | 3.71995000  | 0.76183800  | C | -0.84609400 | 3.13149200  | -2.41783900 |
| N  | 2.24012200  | 2.31030300  | 0.32649500  | H | -0.03673400 | 3.85855400  | -2.29243400 |
| N  | 0.16942700  | 3.00853700  | 0.30618800  | H | -0.37863300 | 2.15704300  | -2.59995500 |
| C  | 4.12807700  | 1.47270200  | -0.98778400 | H | -1.40818900 | 3.40463200  | -3.31440900 |
| C  | 3.39543900  | 1.46411000  | 0.21454800  | C | -1.11101500 | -1.40143300 | 0.95306900  |
| C  | 3.79592800  | 0.67990900  | 1.31141800  | N | -2.00956900 | -2.19993000 | 0.10352100  |
| C  | 4.94553500  | -0.10578300 | 1.17407000  | C | -3.32785400 | -1.87162500 | -0.15544700 |
| C  | 5.69541500  | -0.12525300 | -0.00556700 | C | -3.93783900 | -2.26096100 | -1.36834400 |
| C  | 5.26821700  | 0.66882100  | -1.07514200 | C | -4.11648100 | -1.18544900 | 0.79161700  |
| H  | 5.25880800  | -0.72088400 | 2.01425200  | C | -5.27535700 | -1.97066600 | -1.61784700 |
| H  | 5.83508900  | 0.66235300  | -2.00321300 | H | -3.34716600 | -2.80051400 | -2.10207200 |
| C  | -1.75899600 | 3.08278100  | -1.21496800 | C | -5.45689900 | -0.90461100 | 0.53118000  |
| C  | -3.14536500 | 3.07649000  | -1.38932000 | H | -3.67158800 | -0.90088700 | 1.74002100  |
| C  | -4.02882000 | 3.01529500  | -0.30703900 | C | -6.05154800 | -1.28901200 | -0.67388200 |
| C  | -3.49084900 | 2.99159500  | 0.98298400  | H | -5.71922100 | -2.28313700 | -2.56027700 |
| C  | -2.11168800 | 2.99636800  | 1.21159400  | H | -6.04676200 | -0.39041500 | 1.28690700  |
| C  | -1.25253500 | 3.02300800  | 0.09753900  | H | -7.09848800 | -1.07520200 | -0.86867900 |
| H  | -3.54489300 | 3.10857600  | -2.40006700 | B | -0.70453700 | -2.12842300 | -0.52894600 |
| H  | -4.16158500 | 2.95165800  | 1.83788800  | C | 1.10769200  | -3.04291500 | -1.69857700 |
| Cu | 0.30486300  | 0.23988000  | -0.42302000 | O | 0.09719300  | -3.29096500 | -0.72443000 |
| H  | 2.74413600  | 3.76502700  | 1.78931200  | C | 0.44743500  | -1.93893700 | -2.61023900 |
| H  | 0.80349000  | 4.97752500  | -0.16359400 | O | -0.33904800 | -1.18505200 | -1.64208300 |
| C  | 6.94919900  | -0.96077800 | -0.11190200 | C | 2.38173500  | -2.55413100 | -0.98623200 |
| H  | 6.86442400  | -1.88396800 | 0.46876300  | H | 2.66201200  | -3.29680700 | -0.23435100 |
| H  | 7.16355700  | -1.23057100 | -1.15000600 | H | 3.22158400  | -2.42515800 | -1.67681500 |
| H  | 7.82060100  | -0.41455800 | 0.27050700  | H | 2.21922800  | -1.60523500 | -0.46447300 |
| C  | -5.51871400 | 2.93058300  | -0.52844500 | C | 1.40836200  | -4.35697300 | -2.42646100 |
| H  | -6.07479500 | 3.38596500  | 0.29663900  | H | 0.49679000  | -4.81085900 | -2.81911000 |
| H  | -5.81581500 | 3.42679400  | -1.45723000 | H | 2.11358700  | -4.20660300 | -3.25177100 |
| H  | -5.82863000 | 1.88081900  | -0.59825100 | H | 1.85644300  | -5.06554900 | -1.72369400 |
| C  | 3.00665600  | 0.64635200  | 2.59775500  | C | 1.42160700  | -1.00196800 | -3.31768900 |
| H  | 2.67558700  | 1.64321500  | 2.90549700  | H | 2.05957200  | -1.56468900 | -4.00782500 |
| H  | 2.11000500  | 0.02372200  | 2.50315500  | H | 0.87023000  | -0.25848200 | -3.90301500 |
| H  | 3.60903000  | 0.22695900  | 3.40748300  | H | 2.06566500  | -0.47549300 | -2.60993900 |
| C  | 3.69707800  | 2.31597400  | -2.16485800 | C | -0.54755500 | -2.52227600 | -3.62252500 |
| H  | 2.65384600  | 2.12581100  | -2.43494000 | H | -1.22807600 | -3.22657900 | -3.13865200 |
| H  | 3.78558200  | 3.38870700  | -1.95384300 | H | -1.14109900 | -1.70897000 | -4.04970000 |
| H  | 4.31825100  | 2.10418200  | -3.03862500 | H | -0.03465100 | -3.04124600 | -4.43803500 |
| C  | -1.58058400 | 2.97757500  | 2.62556300  | C | -0.71451400 | -1.93980300 | 2.28459700  |
| H  | -1.32603500 | 3.98728900  | 2.97417800  | C | -0.66308700 | -3.32265900 | 2.53765900  |
|    |             |             |             | C | -0.35251200 | -1.07045000 | 3.32878200  |
|    |             |             |             | C | -0.25701900 | -3.80734200 | 3.77976300  |

|   |             |             |            |
|---|-------------|-------------|------------|
| H | -0.95028400 | -4.00693300 | 1.74655700 |
| C | 0.05766600  | -1.55595800 | 4.57170200 |
| H | -0.41199000 | 0.00415900  | 3.16582600 |
| C | 0.11058800  | -2.93112700 | 4.80528600 |
| H | -0.22930600 | -4.88094900 | 3.95024300 |
| H | 0.32218700  | -0.85768000 | 5.36269900 |
| H | 0.42485300  | -3.31422100 | 5.77225600 |
| H | -1.42505700 | -0.34703600 | 1.01596200 |
| H | 3.06867600  | 4.26006400  | 0.12098000 |
| H | 0.54913000  | 4.68215800  | 1.56433100 |

**L<sub>1</sub>-16**

|    |             |             |             |
|----|-------------|-------------|-------------|
| Cu | 0.69423900  | 0.29773700  | 0.28456900  |
| N  | -1.96197600 | -0.68158400 | -0.51316500 |
| N  | 2.68494500  | 2.42397500  | 0.09952700  |
| N  | 3.61821300  | 0.46150800  | -0.08490000 |
| O  | -4.34346600 | -0.90963600 | -1.25710300 |
| O  | -3.92221400 | -0.10468000 | 0.85659100  |
| B  | -3.37016300 | -0.57026100 | -0.32684000 |
| C  | 2.44094600  | 1.09769400  | 0.07308700  |
| C  | 4.10523600  | 2.75892700  | -0.14975700 |
| C  | 4.77997500  | 1.38029900  | -0.06441500 |
| C  | 3.80159400  | -0.96371200 | -0.10186400 |
| C  | 4.01245400  | -1.60105600 | -1.33896100 |
| C  | 4.22415600  | -2.98277800 | -1.34458700 |
| H  | 4.38320900  | -3.48423800 | -2.29646200 |
| C  | 4.22517700  | -3.73537700 | -0.16538800 |
| C  | 4.00763000  | -3.06983500 | 1.04394300  |
| H  | 3.99467600  | -3.63919500 | 1.97033000  |
| C  | 3.79810400  | -1.68773600 | 1.10405900  |
| C  | 3.53647300  | -1.02520700 | 2.43574700  |
| C  | 3.96586600  | -0.83282000 | -2.63850300 |
| C  | 1.67602300  | 3.44468200  | 0.16565400  |
| C  | 0.95472200  | 3.78823500  | -0.99174000 |
| C  | 1.16810400  | 3.06673400  | -2.30108500 |
| C  | -0.00292900 | 4.80351800  | -0.89489400 |
| H  | -0.57098700 | 5.07109800  | -1.78276100 |
| C  | -0.25199400 | 5.47573800  | 0.30497700  |
| C  | 0.48149900  | 5.10435400  | 1.43690300  |
| H  | 0.29076800  | 5.60511500  | 2.38332900  |
| C  | 1.44712600  | 4.09532400  | 1.39204800  |
| C  | 2.19542400  | 3.69823900  | 2.64243600  |
| C  | -1.10189800 | -0.42339700 | 0.67516700  |

|   |             |             |             |
|---|-------------|-------------|-------------|
| H | -1.57252300 | 0.40714000  | 1.21373500  |
| C | -1.37259700 | -1.04743700 | -1.74451300 |
| C | -0.16536400 | -1.77335700 | -1.78243000 |
| H | 0.29211100  | -2.09560200 | -0.85422500 |
| C | 0.42702500  | -2.11841400 | -2.99876200 |
| H | 1.34908200  | -2.69391500 | -2.98812500 |
| C | -0.16075400 | -1.75232900 | -4.21006400 |
| H | 0.29932700  | -2.02573200 | -5.15542700 |
| C | -1.35978800 | -1.03562000 | -4.18259300 |
| H | -1.83565400 | -0.73644100 | -5.11334400 |
| C | -1.95686400 | -0.68346200 | -2.97379000 |
| H | -2.88652600 | -0.12869100 | -2.97338200 |
| C | -5.61875600 | -0.46464300 | -0.73403800 |
| C | -6.69109400 | -1.46618000 | -1.15964300 |
| H | -6.78495700 | -1.46299400 | -2.24971400 |
| H | -7.66530000 | -1.20099400 | -0.73470100 |
| H | -6.43795300 | -2.48084000 | -0.84769800 |
| C | -5.90712200 | 0.91099300  | -1.35283500 |
| H | -5.14777100 | 1.64118600  | -1.05857600 |
| H | -6.88928800 | 1.29296200  | -1.05733500 |
| H | -5.88803200 | 0.82083400  | -2.44282100 |
| C | -5.33761500 | -0.39719400 | 0.81728100  |
| C | -6.08194400 | 0.70698800  | 1.56695600  |
| H | -5.79333700 | 0.69004800  | 2.62201100  |
| H | -7.16569600 | 0.55831100  | 1.51000400  |
| H | -5.84266000 | 1.69508900  | 1.16944900  |
| C | -5.53929900 | -1.74394900 | 1.52697900  |
| H | -5.01223700 | -2.54776200 | 1.00570400  |
| H | -6.59803700 | -2.01092300 | 1.60385300  |
| H | -5.12436000 | -1.67510700 | 2.53608700  |
| C | -1.00845300 | -1.57350200 | 1.63773300  |
| C | -0.60689600 | -1.33275000 | 2.97037000  |
| H | -0.40381700 | -0.30784900 | 3.27796500  |
| C | -0.47741800 | -2.36513900 | 3.89429100  |
| H | -0.17415000 | -2.13833200 | 4.91417300  |
| C | -0.74776400 | -3.68750200 | 3.52281500  |
| H | -0.64865300 | -4.49537600 | 4.24248200  |
| C | -1.15882600 | -3.94499700 | 2.21556900  |
| H | -1.38700600 | -4.96359000 | 1.90937700  |
| C | -1.29132800 | -2.90672500 | 1.28871600  |
| H | -1.62911500 | -3.13024700 | 0.28143800  |
| H | 0.76520400  | 2.04828800  | -2.25996600 |
| H | 3.26955200  | 3.90607100  | 2.56541500  |
| H | 2.46059700  | -0.89147400 | 2.59850400  |

|                         |             |             |             |   |             |             |             |
|-------------------------|-------------|-------------|-------------|---|-------------|-------------|-------------|
| H                       | 4.67661400  | 0.00074800  | -2.65853800 | C | 1.89054900  | 1.95687000  | -4.02984000 |
| H                       | 4.47876700  | 3.46514600  | 0.59624400  | H | 2.49686400  | 1.23023700  | -4.58221400 |
| H                       | 5.34474600  | 1.24478500  | 0.86607500  | C | 4.44366100  | 1.31969000  | 0.32399300  |
| C                       | 4.47808500  | -5.22421000 | -0.19445600 | H | 5.17887500  | 0.61680700  | -0.08423400 |
| H                       | 5.53832900  | -5.44892800 | -0.02235900 | C | 1.46621400  | -2.90269700 | -1.85536400 |
| H                       | 3.90624500  | -5.74048200 | 0.58228100  | C | 1.65854400  | -3.78354800 | -0.77632100 |
| H                       | 4.20514500  | -5.65707400 | -1.16112000 | C | 2.73068500  | -3.54076200 | 0.25854600  |
| C                       | -1.27022400 | 6.58911600  | 0.37520900  | H | 3.73263300  | -3.49047200 | -0.18335700 |
| H                       | -1.77091400 | 6.61138400  | 1.34787000  | C | 0.80168700  | -4.88063500 | -0.66040000 |
| H                       | -0.79632600 | 7.56836100  | 0.23127000  | H | 0.93417400  | -5.56005300 | 0.17800800  |
| H                       | -2.03591400 | 6.48013300  | -0.39810800 | C | -0.23123200 | -5.11316800 | -1.57379900 |
| H                       | 1.81796900  | 4.24767900  | 3.50836100  | C | -0.38510100 | -4.22372300 | -2.64043500 |
| H                       | 2.08812500  | 2.62792700  | 2.84586300  | H | -1.18116700 | -4.39078900 | -3.36221000 |
| H                       | 3.91834200  | -1.64279800 | 3.25298300  | C | 0.44942300  | -3.11375200 | -2.80327000 |
| H                       | 4.00340000  | -0.03854800 | 2.50855200  | C | 0.23007700  | -2.15885200 | -3.95260500 |
| H                       | 4.20474500  | -1.48783000 | -3.48014800 | H | 1.15076100  | -1.96514200 | -4.51412000 |
| H                       | 2.96755600  | -0.41729200 | -2.81145200 | C | -1.15980600 | 0.98664700  | -0.07311100 |
| H                       | 0.66515600  | 3.59205800  | -3.11679400 | H | -1.40556700 | 1.64039400  | -0.91675800 |
| H                       | 2.22915800  | 2.98277600  | -2.55863400 | C | -2.19335800 | -1.16138200 | 0.72169800  |
| H                       | 4.21347600  | 3.22059400  | -1.13881200 | C | -1.05007500 | -1.45898400 | 1.49151500  |
| H                       | 5.45380600  | 1.17960100  | -0.90103000 | H | -0.28381300 | -0.70519400 | 1.61960900  |
| <b>L<sub>1</sub>-17</b> |             |             |             | C | -0.89355800 | -2.70260100 | 2.10620000  |
| Cu                      | 0.47221700  | 0.13164900  | -0.78554200 | H | -0.00053100 | -2.88314300 | 2.69900100  |
| N                       | -2.34670600 | 0.10361600  | 0.10814300  | C | -1.87000800 | -3.68987300 | 1.97892600  |
| N                       | 2.35285200  | -1.78224100 | -2.01300700 | H | -1.75430900 | -4.65277600 | 2.46839700  |
| N                       | 3.11326800  | 0.26202400  | -2.03038300 | C | -3.00412600 | -3.40931900 | 1.21231200  |
| O                       | -4.85524200 | 0.09825200  | -0.04919200 | H | -3.77982000 | -4.16245800 | 1.09323700  |
| O                       | -3.69786300 | 1.85051500  | -0.98074700 | C | -3.16574100 | -2.17472100 | 0.58772000  |
| B                       | -3.60383300 | 0.65022200  | -0.28981800 | H | -4.05517600 | -1.98471800 | 0.00280400  |
| C                       | 2.07983100  | -0.51557000 | -1.64848100 | C | -5.82873600 | 0.87173700  | -0.79249600 |
| C                       | 3.63551500  | -1.92200500 | -2.73923100 | C | -7.12171800 | 0.92833700  | 0.01964300  |
| H                       | 4.28666900  | -2.64255600 | -2.23576600 | H | -7.54036000 | -0.07793200 | 0.11454300  |
| C                       | 4.19562200  | -0.48729600 | -2.70785400 | H | -7.86732100 | 1.55971000  | -0.47556400 |
| H                       | 5.12854600  | -0.41082200 | -2.13983500 | H | -6.94790300 | 1.31511100  | 1.02530900  |
| C                       | 3.18916600  | 1.68665200  | -1.85931000 | C | -6.07267900 | 0.13685700  | -2.11891700 |
| C                       | 3.85928300  | 2.21490400  | -0.74145400 | H | -5.15713200 | 0.08235700  | -2.71491200 |
| C                       | 3.95218700  | 3.60564100  | -0.62424200 | H | -6.84857300 | 0.62418700  | -2.71737600 |
| H                       | 4.46737500  | 4.02282200  | 0.23784900  | H | -6.39773100 | -0.88506800 | -1.90366300 |
| C                       | 3.39896000  | 4.46880900  | -1.57512200 | C | -5.08723300 | 2.25100300  | -0.97539900 |
| C                       | 2.74203100  | 3.90811600  | -2.67513700 | C | -5.38577300 | 2.98270900  | -2.28326400 |
| H                       | 2.30744400  | 4.56298000  | -3.42682800 | H | -4.79901700 | 3.90490500  | -2.32733500 |
| C                       | 2.62592600  | 2.52450600  | -2.83938600 | H | -6.44528300 | 3.25256200  | -2.34925900 |
|                         |             |             |             | H | -5.12439100 | 2.37648600  | -3.15253800 |
|                         |             |             |             | C | -5.27739600 | 3.20212600  | 0.21514300  |

|    |             |             |             |
|----|-------------|-------------|-------------|
| H  | -5.06424800 | 2.69748700  | 1.16139600  |
| H  | -6.29315500 | 3.60783900  | 0.25557900  |
| H  | -4.57530500 | 4.03426700  | 0.11564800  |
| C  | -0.88940600 | 1.89271000  | 1.09892200  |
| C  | 0.03837100  | 2.94887700  | 0.96350400  |
| H  | 0.54490700  | 3.08417800  | 0.00985100  |
| C  | 0.31708400  | 3.81626200  | 2.01481500  |
| H  | 1.03444200  | 4.62076600  | 1.86890900  |
| C  | -0.31921800 | 3.66284500  | 3.25284200  |
| H  | -0.10179200 | 4.33979300  | 4.07442400  |
| C  | -1.24391500 | 2.63103400  | 3.40642200  |
| H  | -1.75768900 | 2.49859800  | 4.35591600  |
| C  | -1.52618200 | 1.76059300  | 2.34731600  |
| H  | -2.26210200 | 0.97473600  | 2.48448900  |
| H  | 2.73787900  | -4.34487600 | 0.99833800  |
| H  | 2.56389000  | -2.59920300 | 0.79200600  |
| H  | -0.50884600 | -2.55938200 | -4.65128800 |
| H  | -0.13709800 | -1.19053500 | -3.59383000 |
| H  | 1.60748800  | 2.75190400  | -4.72423900 |
| H  | 0.97634700  | 1.44001400  | -3.71753500 |
| H  | 4.94728400  | 1.91307600  | 1.09089900  |
| H  | 3.67099100  | 0.72430100  | 0.82108200  |
| C  | -1.18286000 | -6.26848300 | -1.38076000 |
| H  | -1.95795000 | -6.00195800 | -0.65214500 |
| H  | -1.68406100 | -6.53861400 | -2.31473000 |
| H  | -0.66765700 | -7.15613200 | -1.00004600 |
| C  | 3.48344000  | 5.96730200  | -1.40447200 |
| H  | 2.62592700  | 6.34676400  | -0.83514200 |
| H  | 4.38805000  | 6.25872600  | -0.86250500 |
| H  | 3.48457600  | 6.48123400  | -2.37036800 |
| H  | 3.45460400  | -2.28530800 | -3.75673100 |
| H  | 4.37569900  | -0.07785500 | -3.70713000 |
| C  | -0.31806500 | -0.83895500 | 5.50749100  |
| H  | -0.73447900 | -1.33501300 | 6.37918500  |
| H  | -0.97633900 | -0.70519900 | 4.65363100  |
| Br | 2.96330300  | -0.84987500 | 3.44954000  |
| C  | 0.94957700  | -0.41956500 | 5.48623400  |
| H  | 1.59805200  | -0.58127000 | 6.34547400  |
| C  | 1.54853600  | 0.29406300  | 4.32983500  |
| H  | 0.83249700  | 0.52216100  | 3.54366800  |
| H  | 2.09996000  | 1.19043900  | 4.61010400  |

### L<sub>1</sub>- TS18

|    |             |             |             |
|----|-------------|-------------|-------------|
| Cu | 0.95520500  | 0.49559500  | 0.68604500  |
| N  | -1.53104500 | -1.30576900 | 0.59672500  |
| N  | 2.39812500  | 0.11226000  | -2.02919700 |
| N  | 1.34663900  | 2.01631800  | -1.95863800 |
| O  | -3.31345700 | -2.78300900 | -0.32858400 |
| O  | -3.23565300 | -0.59583300 | -1.04313500 |
| B  | -2.66412200 | -1.56267400 | -0.22470400 |
| C  | 1.59741300  | 0.88586100  | -1.26312000 |
| C  | 2.67409300  | 0.68582600  | -3.36866700 |
| H  | 3.74906400  | 0.70941100  | -3.56537300 |
| C  | 2.05505200  | 2.08435300  | -3.25949300 |
| H  | 2.80869500  | 2.87928200  | -3.23628200 |
| C  | 0.49921000  | 3.11112700  | -1.57004200 |
| C  | 1.04942500  | 4.20068900  | -0.86521600 |
| C  | 0.21013400  | 5.27286600  | -0.54549800 |
| H  | 0.62564100  | 6.11257600  | 0.00662100  |
| C  | -1.13517600 | 5.30298300  | -0.92670900 |
| C  | -1.63542200 | 4.22713000  | -1.66351900 |
| H  | -2.67400000 | 4.23986000  | -1.98678500 |
| C  | -0.84252600 | 3.12389900  | -1.99927300 |
| C  | -1.45613400 | 1.99506600  | -2.79545200 |
| H  | -0.70921100 | 1.40907600  | -3.33509800 |
| C  | 2.50697300  | 4.23999700  | -0.47521500 |
| H  | 3.16071600  | 4.18848100  | -1.35415200 |
| C  | 2.79312000  | -1.24356200 | -1.76114900 |
| C  | 4.10986600  | -1.51357800 | -1.34695200 |
| C  | 5.11549600  | -0.41071900 | -1.12289300 |
| H  | 5.33540500  | 0.13495200  | -2.04852300 |
| C  | 4.47728700  | -2.84988100 | -1.14743700 |
| H  | 5.49028800  | -3.06736300 | -0.81701800 |
| C  | 3.58745200  | -3.90517700 | -1.36193200 |
| C  | 2.29606200  | -3.60168300 | -1.80589200 |
| H  | 1.59146700  | -4.40915500 | -1.99007000 |
| C  | 1.87956100  | -2.28514800 | -2.01829300 |
| C  | 0.47869500  | -2.00192800 | -2.50569900 |
| H  | 0.47734200  | -1.36143800 | -3.39490600 |
| C  | -1.07245700 | 0.09869500  | 0.71930000  |
| H  | -1.18633800 | 0.55362800  | -0.26643000 |
| C  | -0.93145300 | -2.36451000 | 1.34692300  |
| C  | 0.45326300  | -2.58750100 | 1.30919600  |
| H  | 1.08069600  | -1.94267900 | 0.70282400  |
| C  | 1.03107000  | -3.63042900 | 2.03211400  |

|   |             |             |             |              |             |             |             |
|---|-------------|-------------|-------------|--------------|-------------|-------------|-------------|
| H | 2.10622900  | -3.77911200 | 1.97963700  | C            | 3.99831700  | -5.33763600 | -1.11461300 |
| C | 0.23716000  | -4.48581700 | 2.80030500  | H            | 3.50711800  | -5.73842800 | -0.21979800 |
| H | 0.68749800  | -5.29944300 | 3.36183100  | H            | 3.71634100  | -5.98525800 | -1.95178900 |
| C | -1.14277000 | -4.28346700 | 2.83160800  | H            | 5.07838600  | -5.42537100 | -0.96779500 |
| H | -1.77744400 | -4.93973500 | 3.42115400  | C            | -2.02812600 | 6.45983100  | -0.54484000 |
| C | -1.72163100 | -3.23290200 | 2.11762700  | H            | -2.64411400 | 6.20806400  | 0.32723600  |
| H | -2.79589800 | -3.08920400 | 2.14176100  | H            | -1.44534600 | 7.34960900  | -0.29014000 |
| C | -4.25527900 | -2.68444900 | -1.42482900 | H            | -2.71326300 | 6.72210700  | -1.35739000 |
| C | -5.48916800 | -3.51545200 | -1.07659600 | H            | 2.20199600  | 0.07140500  | -4.14446400 |
| H | -5.21140600 | -4.57098600 | -1.00347800 | H            | 1.35126000  | 2.30899300  | -4.06630000 |
| H | -6.25760200 | -3.42055100 | -1.85130600 | C            | 0.42569500  | 0.02558700  | 3.53530300  |
| H | -5.91857200 | -3.21343400 | -0.11978100 | H            | -0.32275800 | -0.74054300 | 3.39640500  |
| C | -3.56516700 | -3.26303000 | -2.66846500 | H            | 0.09419500  | 1.05397300  | 3.45001300  |
| H | -2.68536600 | -2.67366500 | -2.94189600 | Br           | 3.12131800  | 1.14298100  | 1.65858600  |
| H | -4.23982300 | -3.29954400 | -3.52946500 | C            | 1.68341700  | -0.27772900 | 4.00018900  |
| H | -3.23469000 | -4.28139500 | -2.44575200 | H            | 1.97912200  | -1.32160500 | 4.07566000  |
| C | -4.49825000 | -1.12863100 | -1.51726900 | C            | 2.66037100  | 0.70843400  | 4.15698100  |
| C | -4.75734100 | -0.59550900 | -2.92513000 | H            | 2.37520500  | 1.74997600  | 4.24415300  |
| H | -4.88828500 | 0.49001300  | -2.88847100 | H            | 3.66456800  | 0.45811700  | 4.48069500  |
| H | -5.67046500 | -1.03043900 | -3.34549700 |              |             |             |             |
| H | -3.92604700 | -0.81332300 | -3.59833100 | <b>L1-19</b> |             |             |             |
| C | -5.58543300 | -0.62766700 | -0.55602100 |              |             |             |             |
| H | -5.41594900 | -0.99664300 | 0.45914600  | Cu           | 0.91414700  | 0.70410200  | 0.91482000  |
| H | -6.58557000 | -0.93436200 | -0.87734500 | N            | -1.05432500 | -1.64623800 | 0.58879100  |
| H | -5.55164800 | 0.46456700  | -0.52265800 | N            | 2.25366200  | 0.81077700  | -1.86886700 |
| C | -1.87034900 | 0.91863800  | 1.68514200  | N            | 0.70623400  | 2.34285900  | -1.75723200 |
| C | -1.76178800 | 2.32655400  | 1.65463800  | O            | -2.46664400 | -3.46642900 | -0.34738400 |
| H | -1.10027300 | 2.79016600  | 0.92798400  | O            | -3.01521000 | -1.29474500 | -0.87771500 |
| C | -2.47810100 | 3.13062400  | 2.53518600  | B            | -2.14854900 | -2.13030900 | -0.18878900 |
| H | -2.36903900 | 4.21131300  | 2.48065500  | C            | 1.22905100  | 1.27249600  | -1.11554100 |
| C | -3.33488800 | 2.56062200  | 3.48483400  | C            | 2.46482800  | 1.57832800  | -3.11863400 |
| H | -3.89327700 | 3.18865400  | 4.17321500  | H            | 3.49824000  | 1.92784600  | -3.18364100 |
| C | -3.45712400 | 1.17339700  | 3.52960200  | C            | 1.45875300  | 2.72466300  | -2.97567300 |
| H | -4.11762800 | 0.70904900  | 4.25813600  | H            | 1.94622700  | 3.69313200  | -2.82467900 |
| C | -2.73766400 | 0.36453200  | 2.64459400  | C            | -0.50051300 | 3.06585000  | -1.45065500 |
| H | -2.85348500 | -0.71248500 | 2.69701200  | C            | -0.43564400 | 4.31995000  | -0.80676300 |
| H | 6.05918600  | -0.82307700 | -0.75638500 | C            | -1.63556400 | 4.99332000  | -0.55177500 |
| H | 4.75080300  | 0.31250900  | -0.38830500 | H            | -1.59175800 | 5.95013200  | -0.03670400 |
| H | -0.03041400 | -2.93358500 | -2.76498700 | C            | -2.87635100 | 4.48852700  | -0.95184000 |
| H | -0.11904500 | -1.49662100 | -1.74095500 | C            | -2.89608500 | 3.28793900  | -1.66424100 |
| H | -2.16896900 | 2.39122400  | -3.52557700 | H            | -3.84471400 | 2.89820400  | -2.02689800 |
| H | -2.00618600 | 1.30082000  | -2.14976300 | C            | -1.72756300 | 2.56825300  | -1.93726400 |
| H | 2.73623400  | 5.17161000  | 0.04864400  | C            | -1.82643600 | 1.30795000  | -2.76546600 |
| H | 2.7775900   | 3.40601900  | 0.17872600  | H            | -0.87982700 | 1.05234000  | -3.24512600 |

|   |             |             |             |                            |             |             |             |
|---|-------------|-------------|-------------|----------------------------|-------------|-------------|-------------|
| C | 0.87364600  | 4.97894800  | -0.45094400 | H                          | -5.46392800 | -0.91905200 | -0.09769900 |
| H | 1.31639900  | 5.45641400  | -1.33571800 | C                          | -1.84756900 | 0.39263700  | 1.81674900  |
| C | 2.97812200  | -0.42143900 | -1.70865900 | C                          | -2.13210000 | 1.77294400  | 1.78592600  |
| C | 4.31841200  | -0.39896800 | -1.27930200 | H                          | -1.69802700 | 2.38945100  | 1.00510400  |
| C | 5.02941800  | 0.88608500  | -0.93538200 | C                          | -2.95710600 | 2.35873300  | 2.74102300  |
| H | 5.31297700  | 1.43494900  | -1.84347800 | H                          | -3.15824400 | 3.42558700  | 2.69146100  |
| C | 5.00973200  | -1.61623700 | -1.21221700 | C                          | -3.52569700 | 1.58350200  | 3.75733700  |
| H | 6.04085000  | -1.60697500 | -0.86697700 | H                          | -4.17038700 | 2.04111500  | 4.50234300  |
| C | 4.42513900  | -2.82809800 | -1.58441300 | C                          | -3.25534600 | 0.21666200  | 3.80144700  |
| C | 3.10533300  | -2.80799900 | -2.04897300 | H                          | -3.68950000 | -0.39933800 | 4.58463400  |
| H | 2.63435600  | -3.73771900 | -2.35955700 | C                          | -2.42493900 | -0.37219800 | 2.84492900  |
| C | 2.36887000  | -1.62393700 | -2.12606600 | H                          | -2.22903600 | -1.43714400 | 2.89276700  |
| C | 0.95088500  | -1.65237700 | -2.64484300 | H                          | 5.95158000  | 0.67755700  | -0.38656400 |
| H | 0.80139900  | -0.93952300 | -3.46339900 | H                          | 4.40496000  | 1.54065000  | -0.32251100 |
| C | -0.94977600 | -0.19153500 | 0.77246400  | H                          | 0.70243700  | -2.64828500 | -3.02029000 |
| H | -1.16280300 | 0.28642400  | -0.18052400 | H                          | 0.23029900  | -1.40102100 | -1.86070900 |
| C | -0.20749200 | -2.60024400 | 1.24959200  | H                          | -2.57945600 | 1.43651500  | -3.54974400 |
| C | 1.17613900  | -2.60296200 | 1.03842300  | H                          | -2.13729600 | 0.44944700  | -2.16139100 |
| H | 1.62190500  | -1.84559700 | 0.40492500  | H                          | 0.71631900  | 5.76634100  | 0.29110100  |
| C | 1.98452400  | -3.57596700 | 1.62731700  | H                          | 1.59676300  | 4.26941900  | -0.04418800 |
| H | 3.05502300  | -3.55620400 | 1.44360900  | C                          | 5.18757500  | -4.12877000 | -1.49006100 |
| C | 1.42450300  | -4.56874500 | 2.43335500  | H                          | 4.79499600  | -4.75905100 | -0.68299500 |
| H | 2.05450000  | -5.32687700 | 2.88949800  | H                          | 5.10536900  | -4.70758800 | -2.41638200 |
| C | 0.04517000  | -4.57723600 | 2.64341400  | H                          | 6.24893100  | -3.95748900 | -1.29089200 |
| H | -0.40787500 | -5.34366200 | 3.26614200  | C                          | -4.15715400 | 5.21807300  | -0.62337000 |
| C | -0.76349200 | -3.60176500 | 2.05984400  | H                          | -4.60139900 | 4.83027700  | 0.30179900  |
| H | -1.83692700 | -3.62753600 | 2.21087000  | H                          | -3.98393500 | 6.28854600  | -0.47935900 |
| C | -3.49518400 | -3.54859200 | -1.36719700 | H                          | -4.90270300 | 5.09636200  | -1.41534300 |
| C | -4.43577900 | -4.69789900 | -1.01039400 | H                          | 2.26648700  | 0.93936700  | -3.98732400 |
| H | -3.88957200 | -5.64465000 | -1.05182000 | H                          | 0.77897800  | 2.81203500  | -3.82860600 |
| H | -5.26907300 | -4.75670300 | -1.71871100 | C                          | 0.89728800  | 0.14448800  | 2.90348500  |
| H | -4.84087100 | -4.58725900 | -0.00302600 | H                          | 0.12470100  | -0.61025900 | 2.98801500  |
| C | -2.78756600 | -3.83805000 | -2.69826200 | H                          | 0.57346100  | 1.10144800  | 3.31283300  |
| H | -2.11765100 | -3.01899300 | -2.97522100 | Br                         | 2.61662200  | 2.38783000  | 1.41978100  |
| H | -3.50042400 | -3.99472600 | -3.51359900 | C                          | 2.18707900  | -0.33732800 | 3.40716000  |
| H | -2.18632100 | -4.74453100 | -2.58715400 | H                          | 2.43797100  | -1.36876200 | 3.16844000  |
| C | -4.13913000 | -2.11066200 | -1.30647200 | C                          | 3.02935900  | 0.36442400  | 4.18448800  |
| C | -4.65736500 | -1.57477500 | -2.63918700 | H                          | 2.83296800  | 1.39878000  | 4.44794200  |
| H | -5.05462700 | -0.56506500 | -2.50021500 | H                          | 3.94059400  | -0.08104600 | 4.57414100  |
| H | -5.46702900 | -2.20533300 | -3.02141900 |                            |             |             |             |
| H | -3.86832500 | -1.52799100 | -3.39188300 | <b>L<sub>I</sub>- TS20</b> |             |             |             |
| C | -5.22303600 | -1.97740800 | -0.22795800 | Cu                         | 1.04077100  | 0.37253600  | 0.74889000  |
| H | -4.87434900 | -2.36118500 | 0.73466800  | N                          | -1.54057300 | -1.55048800 | 0.29244600  |
| H | -6.13771300 | -2.51011700 | -0.50514800 |                            |             |             |             |



|   |             |             |             |   |             |             |             |
|---|-------------|-------------|-------------|---|-------------|-------------|-------------|
| N | 3.05956200  | 0.76386200  | -1.52929500 | H | -0.91282900 | -6.03253500 | 1.12977500  |
| N | 1.29092600  | 2.00287800  | -1.78773300 | C | -1.24469600 | -3.93810300 | 0.78717800  |
| O | -3.52072600 | -2.74052900 | -0.61429400 | H | -2.19952700 | -3.92585300 | 1.30043400  |
| O | -3.64274200 | -0.45019100 | -0.42808500 | C | -4.74551600 | -2.34938500 | -1.28778500 |
| B | -2.87346600 | -1.57968000 | -0.23370600 | C | -5.82631100 | -3.37588000 | -0.95428100 |
| C | 1.83025400  | 1.02519500  | -1.02323600 | H | -5.54987900 | -4.34903100 | -1.37041000 |
| C | 3.44880100  | 1.66582800  | -2.63881100 | H | -6.78911500 | -3.08374300 | -1.38667100 |
| H | 4.24374100  | 2.34403000  | -2.30843500 | H | -5.94961800 | -3.49307100 | 0.12371600  |
| C | 2.13791600  | 2.39667400  | -2.93639000 | C | -4.45215700 | -2.36330700 | -2.79427600 |
| H | 2.25252800  | 3.48212500  | -2.98048700 | H | -3.68415600 | -1.62932900 | -3.05407600 |
| C | -0.03846500 | 2.54167400  | -1.70528000 | H | -5.34818100 | -2.15379500 | -3.38649400 |
| C | -0.22796800 | 3.83030500  | -1.16653800 | H | -4.07966600 | -3.35328600 | -3.07127200 |
| C | -1.52623400 | 4.35081000  | -1.15367100 | C | -4.99452300 | -0.90148000 | -0.71111900 |
| H | -1.68380700 | 5.34015500  | -0.73059900 | C | -5.64619100 | 0.07847800  | -1.68401200 |
| C | -2.61799200 | 3.64541800  | -1.66853000 | H | -5.72279400 | 1.06352900  | -1.21513000 |
| C | -2.38552900 | 2.38929100  | -2.23339400 | H | -6.65700100 | -0.25060000 | -1.94754400 |
| H | -3.21624900 | 1.83378600  | -2.65866600 | H | -5.06704400 | 0.18390200  | -2.60302300 |
| C | -1.10805700 | 1.82133400  | -2.26965300 | C | -5.75809400 | -0.90039500 | 0.62041800  |
| C | -0.90798100 | 0.46307900  | -2.90232800 | H | -5.30917900 | -1.59215300 | 1.33792500  |
| H | 0.00599900  | 0.41582900  | -3.50204300 | H | -6.80941100 | -1.17191500 | 0.48393800  |
| C | 0.91632100  | 4.64209100  | -0.61325700 | H | -5.71155200 | 0.10168700  | 1.05440900  |
| H | 1.68360100  | 4.84285300  | -1.37077000 | C | -1.88171700 | 0.21980600  | 2.00731500  |
| C | 4.01810300  | -0.19857400 | -1.06296800 | C | -2.00066900 | 1.60541900  | 2.21614500  |
| C | 4.94095500  | 0.15780400  | -0.06211000 | H | -1.48436000 | 2.29097800  | 1.55337500  |
| C | 4.92773700  | 1.52249700  | 0.58108900  | C | -2.75677500 | 2.10328600  | 3.27450000  |
| H | 5.10743000  | 2.31413000  | -0.15644600 | H | -2.83213500 | 3.17734300  | 3.41838100  |
| C | 5.89836300  | -0.79177100 | 0.31584200  | C | -3.40921800 | 1.23148300  | 4.14977300  |
| H | 6.61505900  | -0.52625300 | 1.08972300  | H | -3.99855000 | 1.62206400  | 4.97466000  |
| C | 5.96678100  | -2.05792000 | -0.27234000 | C | -3.29652900 | -0.14707500 | 3.95659800  |
| C | 5.05909300  | -2.36248900 | -1.29181600 | H | -3.79806900 | -0.83504500 | 4.63209000  |
| H | 5.11665400  | -3.33034700 | -1.78529700 | C | -2.53963800 | -0.64750000 | 2.89815200  |
| C | 4.08916400  | -1.44679300 | -1.71173500 | H | -2.46729200 | -1.72072100 | 2.75080600  |
| C | 3.18514200  | -1.78560900 | -2.87484300 | H | 5.71607000  | 1.59647000  | 1.33483000  |
| H | 3.47270100  | -1.23019200 | -3.77665400 | H | 3.97062400  | 1.74592600  | 1.06590500  |
| C | -1.06584800 | -0.28394900 | 0.86809000  | H | 3.24931900  | -2.84876400 | -3.12015700 |
| H | -0.99454700 | 0.49240100  | 0.09943800  | H | 2.13872600  | -1.54479700 | -2.67348500 |
| C | -0.76023300 | -2.75100200 | 0.21629100  | H | -1.74986200 | 0.21979900  | -3.55602800 |
| C | 0.46354900  | -2.78238300 | -0.46272600 | H | -0.83934300 | -0.32784100 | -2.14790700 |
| H | 0.84537600  | -1.86623200 | -0.89932900 | H | 0.55545600  | 5.60852100  | -0.25172900 |
| C | 1.19576900  | -3.96804600 | -0.55238800 | H | 1.39220400  | 4.11902800  | 0.22315100  |
| H | 2.15064500  | -3.96731900 | -1.06943100 | C | 6.98715900  | -3.07356200 | 0.18497700  |
| C | 0.70721400  | -5.14525700 | 0.01546600  | H | 6.57360400  | -3.72453900 | 0.96539700  |
| H | 1.27501300  | -6.06801700 | -0.06039700 | H | 7.30738300  | -3.71920000 | -0.63861200 |
| C | -0.51977500 | -5.12433200 | 0.68142300  | H | 7.87462900  | -2.58916300 | 0.60265900  |

|    |             |             |             |
|----|-------------|-------------|-------------|
| C  | -4.01322000 | 4.21956100  | -1.60040000 |
| H  | -4.51453100 | 3.91688900  | -0.67263400 |
| H  | -3.99877500 | 5.31347000  | -1.62003200 |
| H  | -4.63190000 | 3.87210800  | -2.43353500 |
| H  | 3.82481900  | 1.09192000  | -3.49012500 |
| H  | 1.67070600  | 2.06734500  | -3.87282700 |
| C  | 0.61897000  | -0.93846400 | 2.31814900  |
| H  | -0.09324700 | -1.75200900 | 2.36414000  |
| H  | 0.45829800  | -0.18456300 | 3.08290200  |
| Br | 1.56347500  | 2.39046700  | 2.22590400  |
| C  | 2.00189500  | -1.41186800 | 2.15296300  |
| H  | 2.13487200  | -2.32899800 | 1.58548900  |
| C  | 3.08020000  | -0.81303100 | 2.69895000  |
| H  | 2.99075300  | 0.12318200  | 3.24054700  |
| H  | 4.06780600  | -1.25079700 | 2.59513300  |

**L<sub>1</sub>-21**

|    |             |             |             |
|----|-------------|-------------|-------------|
| Cu | -0.00003500 | 1.16279300  | -0.00030100 |
| Br | -0.00067800 | 3.40453600  | -0.00093700 |
| C  | 0.00012600  | -0.73945500 | 0.00067400  |
| N  | -1.09166400 | -1.52719100 | 0.00099300  |
| N  | 1.09201400  | -1.52703900 | 0.00139200  |
| C  | -0.77081100 | -2.97208800 | 0.00230900  |
| C  | 0.77132100  | -2.97200100 | 0.00197500  |
| H  | -1.19447200 | -3.45650000 | 0.88797700  |
| H  | 1.19543100  | -3.45693800 | 0.88712300  |
| C  | 2.45030300  | -1.05660200 | 0.00054100  |
| C  | 3.10289400  | -0.84305200 | -1.22652200 |
| C  | 3.10441300  | -0.84311200 | 1.22679300  |
| C  | 4.43260200  | -0.41295000 | -1.20117300 |
| C  | 4.43409800  | -0.41302000 | 1.19981600  |
| C  | 5.11474900  | -0.18945500 | -0.00109400 |
| H  | 4.94493000  | -0.24101400 | -2.14481800 |
| H  | 4.94760000  | -0.24111600 | 2.14282700  |
| C  | -2.44999700 | -1.05688300 | 0.00050000  |
| C  | -3.10358400 | -0.84554700 | -1.22633900 |
| C  | -3.10315200 | -0.84129100 | 1.22697200  |
| C  | -4.43337000 | -0.41549700 | -1.20065600 |
| C  | -4.43282100 | -0.41134500 | 1.20033100  |
| C  | -5.11451200 | -0.18994000 | -0.00046800 |
| H  | -4.94647800 | -0.24525400 | -2.14417400 |
| H  | -4.94556800 | -0.23783600 | 2.14346900  |
| C  | 2.39026500  | -1.03884200 | 2.54283800  |

|   |             |             |             |
|---|-------------|-------------|-------------|
| H | 1.54746600  | -0.34594400 | 2.64016900  |
| H | 1.98886600  | -2.05303700 | 2.65014100  |
| H | 3.06917400  | -0.86085200 | 3.38023500  |
| C | 2.38712600  | -1.03869200 | -2.54170200 |
| H | 1.98428600  | -2.05241800 | -2.64794600 |
| H | 1.54512100  | -0.34474700 | -2.63857200 |
| H | 3.06537500  | -0.86206400 | -3.37992100 |
| C | 6.53857900  | 0.31378800  | -0.00198800 |
| H | 7.08337800  | -0.02531500 | -0.88808400 |
| H | 6.56484500  | 1.41037100  | -0.00265500 |
| H | 7.08412900  | -0.02427500 | 0.88403800  |
| C | -2.38786400 | -1.03458900 | 2.54275900  |
| H | -1.98393000 | -2.04772300 | 2.65040500  |
| H | -1.54668100 | -0.33958200 | 2.63921900  |
| H | -3.06674200 | -0.85769700 | 3.38041500  |
| C | -2.38892700 | -1.04351800 | -2.54177800 |
| H | -1.98840300 | -2.05821700 | -2.64764000 |
| H | -3.06725000 | -0.86597700 | -3.37974300 |
| H | -1.54546100 | -0.35150400 | -2.63955400 |
| C | -6.53838800 | 0.31317000  | -0.00067600 |
| H | -7.07969900 | -0.01497300 | -0.89295300 |
| H | -7.08733600 | -0.03588600 | 0.87902800  |
| H | -6.56478700 | 1.40967200  | 0.01239200  |
| H | 1.19506300  | -3.45752500 | -0.88304200 |
| H | -1.19485800 | -3.45826200 | -0.88218800 |

**1b-product**

|   |             |             |             |
|---|-------------|-------------|-------------|
| B | -1.08554100 | -0.04314500 | 0.06457100  |
| C | -2.84295500 | 1.40739500  | 0.17845600  |
| O | -1.53717500 | 1.08431900  | 0.72615800  |
| C | -3.32289100 | 0.00979800  | -0.37628300 |
| O | -2.06455700 | -0.63991700 | -0.70467200 |
| C | -3.70134300 | 1.99583500  | 1.29601800  |
| H | -3.27204000 | 2.94614000  | 1.62577200  |
| H | -4.72042600 | 2.18925600  | 0.94530600  |
| H | -3.74896900 | 1.33091400  | 2.16001000  |
| C | -2.61972400 | 2.45165500  | -0.92335000 |
| H | -2.01206700 | 2.04589400  | -1.73680800 |
| H | -3.56565100 | 2.80951300  | -1.34060200 |
| H | -2.08521500 | 3.30508600  | -0.49808100 |
| C | -4.01152300 | -0.85575200 | 0.68734700  |
| H | -5.00100400 | -0.46802000 | 0.94703100  |
| H | -4.13304400 | -1.86949800 | 0.29578400  |

|                         |             |             |             |    |             |             |             |
|-------------------------|-------------|-------------|-------------|----|-------------|-------------|-------------|
| H                       | -3.41187900 | -0.91301900 | 1.60024000  | N  | 1.09180000  | -1.54520700 | -1.25518000 |
| C                       | -4.17641200 | 0.06927800  | -1.64095200 | N  | -1.09480500 | -1.54376100 | -1.25224200 |
| H                       | -3.64807800 | 0.55975700  | -2.46005300 | C  | 3.14096400  | -2.33348900 | -0.16529100 |
| H                       | -4.42708400 | -0.94564100 | -1.96213300 | C  | 2.44490800  | -1.30687500 | -0.82976200 |
| H                       | -5.11227200 | 0.60646500  | -1.45518500 | C  | 3.04383800  | -0.06384500 | -1.10458500 |
| N                       | 0.26598700  | -0.49346500 | 0.17215900  | C  | 4.36623200  | 0.12844300  | -0.68696700 |
| C                       | 1.19889400  | 0.36610200  | 0.94070900  | C  | 5.08628900  | -0.86323400 | -0.01528700 |
| C                       | 1.96006000  | 1.38987700  | 0.08366500  | C  | 4.45782300  | -2.08893600 | 0.23170600  |
| C                       | 2.85980100  | 2.28149300  | 0.68914900  | H  | 4.84217700  | 1.08393300  | -0.89390000 |
| C                       | 1.72460900  | 1.53060600  | -1.28959400 | H  | 5.00440900  | -2.87421800 | 0.74872800  |
| C                       | 3.51610400  | 3.26140700  | -0.05421500 | C  | -3.13706200 | -2.33008900 | -0.14712600 |
| H                       | 3.04469600  | 2.22468100  | 1.75788700  | C  | -4.45056700 | -2.08451600 | 0.25864900  |
| C                       | 2.38219700  | 2.50930200  | -2.03820800 | C  | -5.08396200 | -0.86208900 | 0.00509700  |
| H                       | 1.02437800  | 0.86249600  | -1.77889500 | C  | -4.36765100 | 0.12860300  | -0.67105700 |
| C                       | 3.28354600  | 3.37807300  | -1.42559800 | C  | -3.04781500 | -0.06482700 | -1.09770500 |
| H                       | 4.20772700  | 3.93723100  | 0.44105700  | C  | -2.44688400 | -1.30636000 | -0.82308700 |
| H                       | 2.18480300  | 2.59030100  | -3.10353400 | H  | -4.99011400 | -2.86514600 | 0.79000400  |
| H                       | 3.79524500  | 4.13982400  | -2.00645000 | H  | -4.84313400 | 1.08537100  | -0.87263400 |
| C                       | 0.71379200  | -1.70700400 | -0.42983100 | Cu | 0.00334400  | -0.45566900 | 1.19785600  |
| C                       | -0.10910900 | -2.84685800 | -0.40332800 | H  | 1.19016300  | -1.45276400 | -3.37516600 |
| C                       | 1.97349600  | -1.81397700 | -1.04377000 | H  | -1.20212900 | -1.45767900 | -3.37214900 |
| C                       | 0.30605300  | -4.04082400 | -0.98791000 | C  | 6.49909800  | -0.61083300 | 0.45522500  |
| H                       | -1.08212700 | -2.78588100 | 0.06819800  | H  | 7.00370700  | 0.12978100  | -0.17192200 |
| C                       | 2.38961800  | -3.01964000 | -1.61004300 | H  | 6.50646900  | -0.22734700 | 1.48296700  |
| H                       | 2.62699400  | -0.95173900 | -1.09241500 | H  | 7.09493600  | -1.52854200 | 0.44652400  |
| C                       | 1.56034800  | -4.13977600 | -1.59210000 | C  | -6.51494900 | -0.63299500 | 0.43070200  |
| H                       | -0.35343800 | -4.90369600 | -0.95664300 | H  | -7.21643100 | -1.07020500 | -0.29088900 |
| H                       | 3.36938600  | -3.07341900 | -2.07646600 | H  | -6.72130500 | -1.09335700 | 1.40189400  |
| H                       | 1.88561300  | -5.07440600 | -2.03867800 | H  | -6.74362400 | 0.43363800  | 0.50527800  |
| C                       | 1.32823100  | -1.15566100 | 4.16699600  | C  | 2.30054600  | 1.04742600  | -1.80623000 |
| H                       | 1.88028200  | -0.35252000 | 4.65068000  | H  | 1.74496700  | 0.68612800  | -2.67793700 |
| H                       | 0.76100400  | -1.81417000 | 4.81826800  | H  | 1.57671100  | 1.55431700  | -1.15236400 |
| C                       | 1.35156500  | -1.32598400 | 2.84498600  | H  | 3.00346700  | 1.80778500  | -2.15670800 |
| H                       | 0.78729800  | -2.14565800 | 2.40363300  | C  | 2.48592000  | -3.66140600 | 0.13481400  |
| C                       | 2.11787600  | -0.45578500 | 1.88563200  | H  | 2.14553400  | -4.16910600 | -0.77513000 |
| H                       | 2.73636900  | 0.24450100  | 2.45363100  | H  | 3.18489900  | -4.32955900 | 0.64363900  |
| H                       | 2.80431100  | -1.07045900 | 1.29322100  | H  | 1.60920000  | -3.53789200 | 0.78003700  |
| H                       | 0.55146600  | 0.95346600  | 1.59870000  | C  | -2.30790100 | 1.04687700  | -1.80216600 |
| <b>L<sub>1</sub>-22</b> |             |             |             | H  | -3.01298400 | 1.80468700  | -2.15384000 |
| C                       | -0.00037200 | -1.24342900 | -0.53590900 | H  | -1.58468600 | 1.55688100  | -1.14994000 |
| C                       | -0.77545300 | -2.09296600 | -2.59000200 | H  | -1.75216700 | 0.68484900  | -2.67343700 |
| C                       | 0.76812600  | -2.09138500 | -2.59317100 | C  | -2.47561500 | -3.65278500 | 0.16183500  |
|                         |             |             |             | H  | -2.13192800 | -4.16400500 | -0.74484600 |
|                         |             |             |             | H  | -1.59997500 | -3.52108700 | 0.80698500  |

|                            |             |             |             |    |             |             |             |
|----------------------------|-------------|-------------|-------------|----|-------------|-------------|-------------|
| H                          | -3.17167800 | -4.32135800 | 0.67410300  | C  | 6.50791600  | -0.75326200 | 0.85496300  |
| O                          | -0.00502100 | 3.19233400  | -0.06893900 | H  | 7.20258200  | -0.58257800 | 0.02731900  |
| C                          | -0.00484400 | 4.39561500  | -0.76382000 | H  | 6.54396100  | 0.13337300  | 1.49989300  |
| C                          | -0.00546900 | 4.14323200  | -2.29105200 | H  | 6.87936700  | -1.59768900 | 1.44346000  |
| H                          | -0.89196600 | 3.56865200  | -2.57993500 | C  | -6.55593600 | -0.29561500 | -0.02927500 |
| H                          | -0.00522600 | 5.07866400  | -2.86428000 | H  | -7.17554700 | -1.19592800 | 0.03245800  |
| H                          | 0.88032000  | 3.56783400  | -2.58047600 | H  | -6.65005300 | 0.22818200  | 0.92994500  |
| C                          | -1.26402700 | 5.21647700  | -0.39804000 | H  | -6.97736200 | 0.35534700  | -0.80050100 |
| H                          | -1.26993800 | 5.43037400  | 0.67770800  | C  | 2.93946800  | -0.06147400 | -2.64685600 |
| H                          | -1.31982300 | 6.17157900  | -0.93587300 | H  | 2.95650800  | -0.81345400 | -3.44678700 |
| H                          | -2.16436000 | 4.63682900  | -0.63012700 | H  | 1.92876200  | 0.35142600  | -2.60259400 |
| C                          | 1.25518800  | 5.21561100  | -0.39897000 | H  | 3.61858700  | 0.74071300  | -2.94522800 |
| H                          | 2.15493300  | 4.63533700  | -0.63177600 | C  | 1.94426200  | -2.79052200 | 1.54513200  |
| H                          | 1.31124200  | 6.17070100  | -0.93679700 | H  | 1.39405400  | -3.53103900 | 0.95484700  |
| H                          | 1.26207200  | 5.42947900  | 0.67678200  | H  | 2.50025200  | -3.32390200 | 2.32024000  |
| Li                         | -0.00241500 | 2.47094900  | 1.45127900  | H  | 1.19972700  | -2.15814800 | 2.04176100  |
| Br                         | 0.00815100  | 0.71364800  | 3.16170500  | C  | -2.18455900 | 0.82283400  | -2.29476200 |
| H                          | -1.19860200 | -3.09641800 | -2.70056900 | H  | -2.84576900 | 1.43715800  | -2.91238900 |
| H                          | 1.19290000  | -3.09352500 | -2.70860500 | H  | -1.56798900 | 1.49880900  | -1.68289100 |
| <b>L<sub>1</sub>- TS23</b> |             |             |             |    |             |             |             |
| C                          | 0.01837600  | -1.06216400 | -0.46636300 | H  | -1.50943000 | 0.28011300  | -2.96444600 |
| C                          | -0.69133400 | -2.50515200 | -2.19057200 | C  | -2.54906200 | -3.27734500 | 0.70373500  |
| C                          | 0.82849200  | -2.65569400 | -2.00407700 | H  | -2.16598000 | -4.00699100 | -0.01944200 |
| N                          | 1.12949000  | -1.61174700 | -0.99654400 | H  | -1.70838700 | -2.98098000 | 1.33993000  |
| N                          | -1.05321500 | -1.58586500 | -1.08903700 | H  | -3.28107600 | -3.79065600 | 1.33205200  |
| C                          | 2.88175800  | -1.96821000 | 0.69216800  | O  | -0.32789000 | 2.85569500  | -0.29906800 |
| C                          | 2.46959400  | -1.39600500 | -0.52721700 | C  | 0.58041600  | 3.64602100  | -1.00370600 |
| C                          | 3.36028900  | -0.65042800 | -1.32151500 | C  | 0.43746300  | 3.40841400  | -2.52456900 |
| C                          | 4.66678200  | -0.46631400 | -0.85763300 | H  | -0.58010700 | 3.65220900  | -2.84867300 |
| C                          | 5.10380500  | -1.00118600 | 0.35703900  | H  | 1.13910400  | 4.01679900  | -3.10863500 |
| C                          | 4.19794200  | -1.75335400 | 1.11154100  | H  | 0.62097400  | 2.35468800  | -2.76111000 |
| H                          | 5.35717200  | 0.11817700  | -1.46123600 | C  | 0.30887900  | 5.14274000  | -0.71592300 |
| H                          | 4.52285200  | -2.18925300 | 2.05346400  | H  | 0.43206500  | 5.34685900  | 0.35596800  |
| C                          | -3.17307600 | -2.07723700 | 0.03169600  | H  | 0.98600600  | 5.81139800  | -1.26252000 |
| C                          | -4.51228700 | -1.75717600 | 0.26319400  | H  | -0.72062300 | 5.39387700  | -0.99538300 |
| C                          | -5.11323700 | -0.63549600 | -0.32037800 | C  | 2.02534600  | 3.30911800  | -0.56974100 |
| C                          | -4.33875000 | 0.17053100  | -1.15755900 | H  | 2.23070700  | 2.24814300  | -0.74565000 |
| C                          | -2.99117000 | -0.10612000 | -1.42338100 | H  | 2.77670600  | 3.90230800  | -1.10700800 |
| C                          | -2.42317600 | -1.24025300 | -0.81739300 | H  | 2.14674600  | 3.49533700  | 0.50370300  |
| H                          | -5.09846400 | -2.39650300 | 0.91935000  | Li | -0.94521700 | 2.86610400  | 1.28783000  |
| H                          | -4.79049700 | 1.04336200  | -1.62318900 | Br | -0.66668800 | 1.20536400  | 2.99482800  |
| Cu                         | -0.13274000 | 0.21591600  | 0.94846200  | H  | -0.95605200 | -2.05603500 | -3.15488100 |
|                            |             |             |             | H  | -1.22953100 | -3.45239600 | -2.09912500 |
|                            |             |             |             | H  | 1.38838100  | -2.48158600 | -2.92593600 |
|                            |             |             |             | H  | 1.11153500  | -3.64091400 | -1.61430700 |

L<sub>1</sub>-TS13<sub>2</sub>

|    |             |             |             |   |             |             |             |
|----|-------------|-------------|-------------|---|-------------|-------------|-------------|
| Cu | 0.31111600  | 0.49890200  | 0.08192400  | C | 1.12856800  | -2.40151000 | 3.72463100  |
| N  | -0.37595500 | -1.31381600 | 0.48908200  | H | 0.82208500  | -2.50716100 | 4.76204400  |
| N  | 2.32174500  | 2.53350600  | -0.30846200 | C | 2.44051700  | -2.70429400 | 3.34646800  |
| N  | 0.29346400  | 3.33698100  | -0.45844900 | H | 3.15955400  | -3.04891000 | 4.08386300  |
| O  | -2.37925800 | -2.76494200 | 0.95128800  | C | 2.80569000  | -2.57761700 | 2.00535000  |
| O  | -2.75817200 | -0.58970100 | 0.27338600  | H | 3.81605200  | -2.82468800 | 1.69086700  |
| B  | -1.81350300 | -1.57771400 | 0.53021500  | C | 1.88422000  | -2.15255000 | 1.04797200  |
| C  | 1.01273500  | 2.21905400  | -0.22605000 | H | 2.16019400  | -2.07678300 | 0.00287900  |
| C  | 2.55414400  | 3.94082800  | -0.70089500 | C | -3.78099400 | -2.70381900 | 0.58147600  |
| H  | 3.24386600  | 4.42923100  | -0.00714200 | C | -4.58230600 | -3.50967300 | 1.60190100  |
| C  | 1.13573600  | 4.53671400  | -0.65712400 | H | -4.28925500 | -4.56186200 | 1.54479900  |
| H  | 0.99827800  | 5.23700400  | 0.17491700  | H | -5.65622500 | -3.44573000 | 1.39605200  |
| C  | -1.13760400 | 3.44144300  | -0.38296600 | H | -4.40047700 | -3.16553900 | 2.62177200  |
| C  | -1.75220300 | 3.65731700  | 0.86305300  | C | -3.90602700 | -3.33765800 | -0.81082600 |
| C  | -3.14244200 | 3.80593000  | 0.89658100  | H | -3.31078500 | -2.79172500 | -1.54730300 |
| H  | -3.62748800 | 3.97021200  | 1.85592800  | H | -4.94625100 | -3.37509900 | -1.14946400 |
| C  | -3.92098900 | 3.74880200  | -0.26321700 | H | -3.51679700 | -4.35794500 | -0.76825700 |
| C  | -3.27646200 | 3.52002200  | -1.48355600 | C | -4.05940500 | -1.14501200 | 0.58725600  |
| H  | -3.86720000 | 3.45569500  | -2.39433700 | C | -5.05842800 | -0.66351200 | -0.46411200 |
| C  | -1.89037600 | 3.36337200  | -1.56852100 | H | -5.14830600 | 0.42567100  | -0.40844600 |
| C  | -1.23008700 | 3.08776600  | -2.89841600 | H | -6.04985200 | -1.09684800 | -0.29309200 |
| H  | -0.48817700 | 3.85190000  | -3.15788400 | H | -4.73306700 | -0.92343000 | -1.47277000 |
| C  | -0.94819200 | 3.70034000  | 2.14051100  | C | -4.44937700 | -0.60264000 | 1.96982100  |
| H  | -0.17104700 | 4.47282900  | 2.11471600  | H | -3.74582500 | -0.93693400 | 2.73755400  |
| C  | 3.41563600  | 1.60601400  | -0.20828900 | H | -5.45679600 | -0.91454400 | 2.26319500  |
| C  | 4.13474000  | 1.53583800  | 0.99904600  | H | -4.42079200 | 0.49045300  | 1.93858400  |
| C  | 3.73353300  | 2.35691600  | 2.20153100  | C | -0.00969500 | -2.91221700 | -1.55071300 |
| H  | 3.87519900  | 3.43170400  | 2.03338900  | C | 0.06959500  | -3.00956500 | -2.97110200 |
| C  | 5.22409800  | 0.66376500  | 1.07120900  | H | -0.06959400 | -2.10597600 | -3.56277200 |
| H  | 5.77825600  | 0.59444300  | 2.00420600  | C | 0.31975300  | -4.21285000 | -3.61324900 |
| C  | 5.60980300  | -0.12782300 | -0.01552800 | H | 0.36766800  | -4.23357200 | -4.70041400 |
| C  | 4.86730700  | -0.03843600 | -1.19649600 | C | 0.51594300  | -5.39300400 | -2.88206400 |
| H  | 5.14391700  | -0.65625600 | -2.04748800 | H | 0.71876500  | -6.33369900 | -3.38542900 |
| C  | 3.76951200  | 0.81975900  | -1.32007000 | C | 0.43740300  | -5.32460700 | -1.48994000 |
| C  | 2.97615200  | 0.84974900  | -2.60438200 | H | 0.57158500  | -6.22706600 | -0.89661900 |
| H  | 2.70607300  | 1.86746100  | -2.90365000 | C | 0.18068300  | -4.12361300 | -0.83024800 |
| C  | -0.28737500 | -1.63138000 | -0.96907900 | H | 0.09227800  | -4.12741700 | 0.24901800  |
| H  | -0.67450400 | -0.84052700 | -1.60212600 | H | 4.33248100  | 2.08093600  | 3.07268300  |
| C  | 0.57474500  | -1.82725000 | 1.43447900  | H | 2.67946100  | 2.20486700  | 2.45367500  |
| C  | 0.20012000  | -1.97028100 | 2.78056900  | H | 3.54608600  | 0.39729300  | -3.41975300 |
| H  | -0.82080400 | -1.75059900 | 3.07716400  | H | 2.04382400  | 0.28272700  | -2.49381100 |
|    |             |             |             | H | -1.97210100 | 3.06206400  | -3.70006600 |
|    |             |             |             | H | -0.70928500 | 2.12447900  | -2.88942500 |
|    |             |             |             | H | -1.59440000 | 3.90949200  | 2.99649200  |

|                                     |             |             |             |   |             |             |             |
|-------------------------------------|-------------|-------------|-------------|---|-------------|-------------|-------------|
| H                                   | -0.44616200 | 2.74341600  | 2.32079100  | C | 1.96938000  | 5.02202300  | 0.42856700  |
| C                                   | 6.80995100  | -1.04042400 | 0.07682700  | C | 1.91333400  | 4.70470200  | -0.93114600 |
| H                                   | 6.69226300  | -1.92056200 | -0.56188000 | H | 2.75349700  | 4.95915900  | -1.57300000 |
| H                                   | 7.72389800  | -0.52468400 | -0.24399200 | C | 0.81066200  | 4.05228600  | -1.49132300 |
| H                                   | 6.97327000  | -1.38342200 | 1.10267300  | C | 0.79896100  | 3.69491800  | -2.95898900 |
| C                                   | -5.41666700 | 3.95351800  | -0.20614200 | H | -0.05325300 | 4.13855900  | -3.48733500 |
| H                                   | -5.68127800 | 4.99476400  | -0.42940500 | C | 0.99235300  | -1.04620100 | -0.37995100 |
| H                                   | -5.93460500 | 3.32487800  | -0.93689600 | H | 1.21632400  | -1.28389500 | -1.42608800 |
| H                                   | -5.81527600 | 3.72093900  | 0.78536700  | C | 2.30208100  | 0.26308200  | 1.32121400  |
| H                                   | 2.99755400  | 3.98080900  | -1.70276400 | C | 1.16935500  | 0.40598300  | 2.14655800  |
| H                                   | 0.86185800  | 5.05407700  | -1.58110300 | H | 0.27995800  | -0.17715200 | 1.94464400  |
| <b>L<sub>1</sub>-17<sub>2</sub></b> |             |             |             | C | 1.18109500  | 1.26750000  | 3.24458200  |
| Cu                                  | -0.33454800 | 0.38990500  | -0.66667400 | H | 0.28955000  | 1.33377300  | 3.86263500  |
| N                                   | 2.28985100  | -0.62043400 | 0.21605000  | C | 2.31724000  | 2.01283100  | 3.55707600  |
| N                                   | -1.41177400 | 3.06389600  | -1.21177700 | H | 2.32996100  | 2.67213300  | 4.42053800  |
| N                                   | -2.81133900 | 1.50180100  | -1.81022700 | C | 3.44430000  | 1.88381300  | 2.74079200  |
| O                                   | 4.75274700  | -1.11097700 | 0.16912700  | H | 4.34441000  | 2.45306800  | 2.96234200  |
| O                                   | 3.41806000  | -2.01657100 | -1.46835900 | C | 3.44032500  | 1.03338700  | 1.63760600  |
| B                                   | 3.46261800  | -1.21870400 | -0.33284100 | H | 4.32662900  | 0.94931800  | 1.02330000  |
| C                                   | -1.60902000 | 1.73286800  | -1.23944200 | C | 5.65114900  | -1.71543200 | -0.79281800 |
| C                                   | -2.56065600 | 3.83839600  | -1.73150800 | C | 6.79003500  | -2.39034500 | -0.02984500 |
| H                                   | -3.04259300 | 4.39084200  | -0.91685900 | H | 7.37542700  | -1.63391900 | 0.50129000  |
| C                                   | -3.46249500 | 2.73517300  | -2.30998000 | H | 7.46191000  | -2.91855000 | -0.71504900 |
| H                                   | -4.49607400 | 2.80255900  | -1.96097600 | H | 6.41365800  | -3.10095800 | 0.70817500  |
| C                                   | -3.34166300 | 0.20723800  | -2.13633200 | C | 6.20370100  | -0.58221800 | -1.66970600 |
| C                                   | -4.37921500 | -0.32323900 | -1.34818600 | H | 5.40172000  | -0.08521000 | -2.22309300 |
| C                                   | -4.91117300 | -1.56715200 | -1.70407700 | H | 6.94632700  | -0.94643700 | -2.38643400 |
| H                                   | -5.71389800 | -1.98469000 | -1.10059800 | H | 6.68362800  | 0.16162600  | -1.02727900 |
| C                                   | -4.44131500 | -2.28602800 | -2.80713100 | C | 4.69211500  | -2.69200000 | -1.57595300 |
| C                                   | -3.41625100 | -1.72396200 | -3.57455900 | C | 5.01965200  | -2.87746800 | -3.05691300 |
| H                                   | -3.04440900 | -2.26290600 | -4.44303400 | H | 4.28179400  | -3.54363000 | -3.51365500 |
| C                                   | -2.85445300 | -0.48160500 | -3.26341300 | H | 6.00905200  | -3.32910800 | -3.18656600 |
| C                                   | -1.74041200 | 0.07966000  | -4.11488500 | H | 4.99484000  | -1.92854600 | -3.59597100 |
| H                                   | -1.91994500 | 1.12283400  | -4.39570000 | C | 4.53737500  | -4.05951800 | -0.89487900 |
| C                                   | -4.90291600 | 0.40771500  | -0.13486200 | H | 4.29492000  | -3.94643100 | 0.16528500  |
| H                                   | -5.30528800 | 1.39534600  | -0.38780100 | H | 5.44496100  | -4.66460700 | -0.98444300 |
| C                                   | -0.26287900 | 3.71883000  | -0.64793000 | H | 3.71286800  | -4.59845600 | -1.36931800 |
| C                                   | -0.24767800 | 4.03498200  | 0.72244400  | C | 0.42938700  | -2.30683600 | 0.21877600  |
| C                                   | -1.39000900 | 3.65428100  | 1.63292300  | C | -0.61844700 | -2.98541100 | -0.44225400 |
| H                                   | -2.35139200 | 4.04259100  | 1.27763900  | H | -1.01267400 | -2.56872500 | -1.36730500 |
| C                                   | 0.87669600  | 4.68664800  | 1.23425200  | C | -1.15155900 | -4.17083100 | 0.05423400  |
| H                                   | 0.90771800  | 4.91772600  | 2.29573400  | H | -1.95149400 | -4.66817500 | -0.48983700 |
|                                     |             |             |             | C | -0.66157100 | -4.72913400 | 1.24161500  |
|                                     |             |             |             | H | -1.07461100 | -5.65633000 | 1.62870600  |

|                                       |             |             |             |   |             |             |             |
|---------------------------------------|-------------|-------------|-------------|---|-------------|-------------|-------------|
| C                                     | 0.37117600  | -4.07377100 | 1.91198000  | C | -2.67758500 | 2.24186500  | -3.02511200 |
| H                                     | 0.77695300  | -4.49461400 | 2.82959500  | H | -3.63708600 | 2.76440200  | -2.96829700 |
| C                                     | 0.90801800  | -2.88247300 | 1.41075200  | C | -3.47569800 | 0.18615100  | -1.78524100 |
| H                                     | 1.72153400  | -2.40069300 | 1.94309900  | C | -4.68083000 | 0.38952000  | -1.08730100 |
| H                                     | -1.22504300 | 4.04854200  | 2.63845800  | C | -5.58513300 | -0.67673100 | -1.00498100 |
| H                                     | -1.48752100 | 2.56667100  | 1.71377600  | H | -6.51815700 | -0.52854600 | -0.46598100 |
| H                                     | 1.71018400  | 4.04785800  | -3.44838300 | C | -5.32743600 | -1.91663200 | -1.59705500 |
| H                                     | 0.73747500  | 2.61078400  | -3.10252000 | C | -4.13188600 | -2.07475400 | -2.30632900 |
| H                                     | -1.62762600 | -0.50138000 | -5.03358800 | H | -3.92214500 | -3.02517600 | -2.79197000 |
| H                                     | -0.78500300 | 0.05233800  | -3.57807200 | C | -3.19789300 | -1.04013900 | -2.42017100 |
| H                                     | -5.70994000 | -0.15999800 | 0.33560600  | C | -1.93281000 | -1.24073100 | -3.22120100 |
| H                                     | -4.11993000 | 0.56163200  | 0.61494600  | H | -1.88387200 | -0.55676300 | -4.07691100 |
| C                                     | 3.19259400  | 5.67198500  | 1.02822500  | C | -5.00233400 | 1.71291800  | -0.43501700 |
| H                                     | 3.82126200  | 6.13373000  | 0.26152600  | H | -5.02432400 | 2.53166000  | -1.16342600 |
| H                                     | 2.92164300  | 6.44237200  | 1.75749900  | C | 0.47146800  | 3.04167500  | -1.18755500 |
| H                                     | 3.79981800  | 4.92562800  | 1.55419200  | C | 0.48080000  | 4.08024700  | -0.23732000 |
| C                                     | -5.00884400 | -3.64315600 | -3.14966800 | C | -0.79706500 | 4.63408900  | 0.34394200  |
| H                                     | -5.02995400 | -3.80741300 | -4.23143600 | H | -1.45839800 | 5.04095300  | -0.43044700 |
| H                                     | -4.40129300 | -4.44507900 | -2.71225300 | C | 1.71713700  | 4.58871300  | 0.16983300  |
| H                                     | -6.02711800 | -3.76005400 | -2.76753800 | H | 1.73522400  | 5.38231900  | 0.91305800  |
| H                                     | -2.23215900 | 4.56185100  | -2.48282000 | C | 2.92397200  | 4.10582900  | -0.34509700 |
| H                                     | -3.47604600 | 2.73264800  | -3.40665800 | C | 2.87496700  | 3.09829900  | -1.31145200 |
| C                                     | -2.81067800 | -1.91747300 | 2.67089400  | H | 3.80291700  | 2.72283900  | -1.73699700 |
| Br                                    | -2.75124000 | 0.01950300  | 3.23215300  | C | 1.66383600  | 2.55009400  | -1.74693000 |
| C                                     | -3.50347100 | -2.72986300 | 3.70397600  | C | 1.66389600  | 1.44595700  | -2.77783200 |
| C                                     | -2.90992100 | -3.72089400 | 4.37249200  | H | 0.84961800  | 1.54948900  | -3.50125800 |
| H                                     | -3.45159700 | -4.31734400 | 5.10052700  | C | 0.50237700  | -1.20512000 | 0.23958600  |
| H                                     | -1.86713000 | -3.97317000 | 4.20164200  | H | 0.42493800  | -1.25413900 | -0.84828200 |
| H                                     | -4.54963000 | -2.49152700 | 3.88792600  | C | 2.14770400  | 0.02623700  | 1.70385700  |
| H                                     | -3.33879900 | -1.88235700 | 1.71880700  | C | 1.23377100  | 0.08432000  | 2.77050300  |
| H                                     | -1.77317800 | -2.20477600 | 2.51440800  | H | 0.31516000  | -0.48578900 | 2.72292100  |
| <b>L<sub>1</sub>-TS18<sub>2</sub></b> |             |             |             | C | 1.49204800  | 0.86801700  | 3.89661400  |
| Cu                                    | -0.90623400 | 0.31847800  | 0.46918900  | H | 0.75551400  | 0.89537000  | 4.69467000  |
| N                                     | 1.88216100  | -0.76009200 | 0.55241500  | C | 2.67142300  | 1.60210700  | 4.00073000  |
| N                                     | -0.78348700 | 2.51973600  | -1.65457300 | H | 2.87341900  | 2.20598100  | 4.88063300  |
| N                                     | -2.54303800 | 1.26872800  | -1.91547400 | C | 3.58871700  | 1.54580800  | 2.94815100  |
| O                                     | 4.26999800  | -1.27240400 | -0.03372000 | H | 4.51706600  | 2.10960400  | 3.00507100  |
| O                                     | 2.61177500  | -1.96043000 | -1.46892000 | C | 3.33249200  | 0.78180300  | 1.81267700  |
| B                                     | 2.90681000  | -1.30141000 | -0.28211200 | H | 4.05441200  | 0.76079600  | 1.00775400  |
| C                                     | -1.42973100 | 1.44305000  | -1.16780200 | C | 4.94784100  | -1.79664800 | -1.20172100 |
| C                                     | -1.47651800 | 3.17184700  | -2.79103800 | C | 6.16438000  | -2.59350200 | -0.73289900 |
| H                                     | -1.77645500 | 4.18960900  | -2.52017700 | H | 6.87257200  | -1.92356600 | -0.23658100 |
|                                       |             |             |             | H | 6.67708700  | -3.06067800 | -1.58053700 |
|                                       |             |             |             | H | 5.88411000  | -3.37145400 | -0.02088000 |

|    |             |             |             |
|----|-------------|-------------|-------------|
| C  | 5.40175400  | -0.59370000 | -2.04123800 |
| H  | 4.54574700  | -0.00540000 | -2.38332600 |
| H  | 5.98152400  | -0.90330200 | -2.91617500 |
| H  | 6.03227000  | 0.05170800  | -1.42298400 |
| C  | 3.81301900  | -2.64767300 | -1.89474700 |
| C  | 3.85007100  | -2.66044800 | -3.42210600 |
| H  | 3.00751300  | -3.24480800 | -3.80348600 |
| H  | 4.77371600  | -3.12204600 | -3.78716900 |
| H  | 3.77593500  | -1.65315500 | -3.83611400 |
| C  | 3.72191900  | -4.08363200 | -1.35882500 |
| H  | 3.68095300  | -4.09582600 | -0.26628900 |
| H  | 4.56959500  | -4.69431900 | -1.68462300 |
| H  | 2.80157000  | -4.54135200 | -1.73131100 |
| C  | 0.15494500  | -2.54209700 | 0.78279800  |
| C  | -0.92691400 | -3.26974700 | 0.22919400  |
| H  | -1.47601900 | -2.84070200 | -0.60616700 |
| C  | -1.29080900 | -4.52458800 | 0.71318800  |
| H  | -2.12313800 | -5.05376300 | 0.25534000  |
| C  | -0.59032300 | -5.10705900 | 1.77302700  |
| H  | -0.87130400 | -6.08584500 | 2.15058600  |
| C  | 0.48923000  | -4.41280100 | 2.32732800  |
| H  | 1.05805900  | -4.85692800 | 3.14093200  |
| C  | 0.85502600  | -3.15488200 | 1.84678600  |
| H  | 1.70384500  | -2.64146800 | 2.28516200  |
| H  | -0.57805000 | 5.44241100  | 1.04621700  |
| H  | -1.35642700 | 3.86075600  | 0.88048100  |
| H  | 2.60557600  | 1.44406100  | -3.33439700 |
| H  | 1.55655200  | 0.46212600  | -2.30885600 |
| H  | -1.88050200 | -2.26017900 | -3.61149900 |
| H  | -1.03832300 | -1.06294200 | -2.61778800 |
| H  | -5.98393100 | 1.67510000  | 0.04463400  |
| H  | -4.25838500 | 1.97056200  | 0.32576100  |
| C  | 4.24416300  | 4.63977400  | 0.15554400  |
| H  | 5.04061800  | 4.50278500  | -0.58198300 |
| H  | 4.18219300  | 5.70538900  | 0.39756000  |
| H  | 4.54606000  | 4.11434500  | 1.06977800  |
| C  | -6.30460700 | -3.06066100 | -1.46252000 |
| H  | -6.32390000 | -3.67976000 | -2.36482900 |
| H  | -6.03138900 | -3.71598200 | -0.62612000 |
| H  | -7.32029600 | -2.70016800 | -1.27565300 |
| H  | -0.81025400 | 3.23679700  | -3.65706400 |
| H  | -2.63246300 | 1.72551600  | -3.99084600 |
| C  | -2.69562500 | -0.98626100 | 2.01442600  |
| Br | -2.20924200 | 1.61904500  | 2.21931700  |

|   |             |             |            |
|---|-------------|-------------|------------|
| C | -2.77635000 | -1.21396200 | 3.42575600 |
| C | -1.97545000 | -2.09023600 | 4.07381300 |
| H | -2.08917700 | -2.26638600 | 5.13929700 |
| H | -1.20339500 | -2.65071300 | 3.55569000 |
| H | -3.53369700 | -0.66334300 | 3.97802500 |
| H | -3.56561200 | -0.62610800 | 1.48287500 |
| H | -1.99226600 | -1.58317900 | 1.44693100 |

### L<sub>1</sub>-19<sub>2</sub>

|    |             |             |             |
|----|-------------|-------------|-------------|
| Cu | -1.12481100 | 0.57887800  | 0.82104200  |
| N  | 1.30399600  | -0.95353600 | 0.63155000  |
| N  | -0.10162100 | 2.54819300  | -1.55187300 |
| N  | -2.00241500 | 1.52605500  | -1.85179300 |
| O  | 3.43978800  | -2.12292800 | 0.05644600  |
| O  | 1.63646900  | -2.39230400 | -1.34408100 |
| B  | 2.12834000  | -1.78373100 | -0.19987000 |
| C  | -0.89748400 | 1.57208600  | -1.06852600 |
| C  | -0.69383800 | 3.27958900  | -2.70036000 |
| H  | -0.85517100 | 4.32773800  | -2.43173600 |
| C  | -2.00669700 | 2.52491300  | -2.94456200 |
| H  | -2.88528400 | 3.17162700  | -2.87046600 |
| C  | -3.05111200 | 0.54360300  | -1.79320900 |
| C  | -4.28894300 | 0.87578500  | -1.20178300 |
| C  | -5.29474000 | -0.09533000 | -1.18277200 |
| H  | -6.24529300 | 0.15102500  | -0.71530600 |
| C  | -5.12177000 | -1.35998900 | -1.75457300 |
| C  | -3.90723100 | -1.63411100 | -2.38726800 |
| H  | -3.76722000 | -2.59521400 | -2.87758800 |
| C  | -2.86310100 | -0.70093200 | -2.42755500 |
| C  | -1.59410100 | -1.05186200 | -3.17162100 |
| H  | -1.10081400 | -0.16943500 | -3.58434900 |
| C  | -4.55833700 | 2.24623600  | -0.62938000 |
| H  | -4.65553900 | 2.99498600  | -1.42608900 |
| C  | 1.27247600  | 2.82372000  | -1.22279500 |
| C  | 1.61111700  | 3.96136300  | -0.46629700 |
| C  | 0.57158500  | 4.92322600  | 0.05155200  |
| H  | 0.21322000  | 5.58252500  | -0.75097700 |
| C  | 2.96809700  | 4.22182000  | -0.24189000 |
| H  | 3.23572200  | 5.08886300  | 0.35746600  |
| C  | 3.98047400  | 3.41828200  | -0.76999300 |
| C  | 3.60986100  | 2.33438000  | -1.57117900 |
| H  | 4.38281300  | 1.72063700  | -2.02860100 |
| C  | 2.26912300  | 2.02434300  | -1.81666600 |





|   |             |             |             |    |             |             |             |
|---|-------------|-------------|-------------|----|-------------|-------------|-------------|
| C | -1.42428600 | 4.97995700  | -0.57188000 | C  | -3.73026100 | -2.07374400 | -1.89805500 |
| H | -1.45398700 | 5.91268000  | -0.01355200 | C  | -4.05694500 | -1.41074200 | -3.23393400 |
| C | -2.60757500 | 4.47106600  | -1.11500400 | H  | -4.53851400 | -0.44482100 | -3.05648800 |
| C | -2.53483000 | 3.29533900  | -1.86596300 | H  | -4.74867000 | -2.03063100 | -3.81393800 |
| H | -3.43663900 | 2.90070200  | -2.32884700 | H  | -3.16056900 | -1.23815900 | -3.83150500 |
| C | -1.32999300 | 2.60942200  | -2.04937500 | C  | -4.98731200 | -2.12802400 | -1.01898800 |
| C | -1.31186500 | 1.36202100  | -2.90163900 | H  | -4.78240200 | -2.61218000 | -0.06048300 |
| H | -0.34806700 | 1.21123600  | -3.39351000 | H  | -5.80237600 | -2.66545500 | -1.51302900 |
| C | 1.06224500  | 4.97244000  | -0.18104500 | H  | -5.31862700 | -1.10716800 | -0.81211000 |
| H | 1.69270300  | 5.36669500  | -0.98878800 | C  | -2.28660400 | 0.23599700  | 1.60654700  |
| C | 3.40136300  | -0.26797500 | -1.31132400 | C  | -2.53377600 | 1.62388700  | 1.64488100  |
| C | 4.63530900  | -0.19125000 | -0.63959400 | H  | -1.82186300 | 2.30631500  | 1.18732100  |
| C | 5.18777900  | 1.11693900  | -0.13137700 | C  | -3.67302600 | 2.13173700  | 2.25851600  |
| H | 5.48969500  | 1.77411400  | -0.95699000 | H  | -3.83621800 | 3.20582200  | 2.28022400  |
| C | 5.35795900  | -1.37792000 | -0.45487300 | C  | -4.61012200 | 1.26685200  | 2.83854100  |
| H | 6.30697500  | -1.32892100 | 0.07359900  | H  | -5.50548300 | 1.66422900  | 3.30810700  |
| C | 4.90304500  | -2.61003200 | -0.92857300 | C  | -4.38185600 | -0.10652600 | 2.80594300  |
| C | 3.68125800  | -2.64565400 | -1.61089400 | H  | -5.09785500 | -0.78899500 | 3.25610000  |
| H | 3.30821800  | -3.59434200 | -1.98989000 | C  | -3.22372300 | -0.61777700 | 2.21139400  |
| C | 2.92096000  | -1.49305800 | -1.81863400 | H  | -3.05478800 | -1.68824600 | 2.19138400  |
| C | 1.60986500  | -1.57513500 | -2.56389200 | H  | 6.07565700  | 0.94271900  | 0.48209700  |
| H | 1.58621100  | -0.89755800 | -3.42533600 | H  | 4.45143700  | 1.65487400  | 0.47444400  |
| C | -1.07314000 | -0.25662000 | 0.90598400  | H  | 1.44106400  | -2.58999700 | -2.93224800 |
| H | -0.95627700 | 0.35179800  | 0.00378800  | H  | 0.76645500  | -1.30487000 | -1.92077300 |
| C | -0.17833400 | -2.64000900 | 1.15993200  | H  | -2.08186600 | 1.42636900  | -3.67635700 |
| C | 1.21093200  | -2.47201400 | 1.15663400  | H  | -1.53017500 | 0.46650200  | -2.31103900 |
| H | 1.64503200  | -1.60199300 | 0.67587500  | H  | 0.80838700  | 5.81470800  | 0.46788300  |
| C | 2.04243200  | -3.40976300 | 1.77028200  | H  | 1.65777600  | 4.26326300  | 0.40132100  |
| H | 3.11631000  | -3.24892000 | 1.76408100  | C  | 5.70563200  | -3.87373600 | -0.72428700 |
| C | 1.50017900  | -4.54906600 | 2.36755500  | H  | 6.04400200  | -4.28925400 | -1.68091800 |
| H | 2.14716200  | -5.28069900 | 2.84277100  | H  | 6.59084700  | -3.69048200 | -0.10930200 |
| C | 0.11729600  | -4.74195200 | 2.34062400  | H  | 5.10766400  | -4.64898100 | -0.23227800 |
| H | -0.31894200 | -5.62710500 | 2.79539200  | C  | -3.93032000 | 5.16616900  | -0.89490800 |
| C | -0.71627000 | -3.79428200 | 1.74747200  | H  | -3.79122500 | 6.20671100  | -0.58835500 |
| H | -1.79003400 | -3.94383400 | 1.73770700  | H  | -4.54393300 | 5.15756200  | -1.80168900 |
| C | -2.98181400 | -3.45849700 | -2.00163100 | H  | -4.50940100 | 4.66447600  | -0.10971800 |
| C | -3.88268300 | -4.69031200 | -1.93476500 | H  | 3.01064100  | 1.13986800  | -3.66700400 |
| H | -3.27029500 | -5.59527400 | -1.98366400 | H  | 1.41015800  | 2.92104600  | -3.68641600 |
| H | -4.58179800 | -4.70898400 | -2.77743400 | C  | 0.27398200  | 0.06451100  | 2.88797500  |
| H | -4.45463900 | -4.72114300 | -1.00588700 | Br | 2.42271300  | 2.38729500  | 2.07147900  |
| C | -2.04834100 | -3.55394400 | -3.21643300 | C  | -0.35201300 | -0.94785500 | 3.72237600  |
| H | -1.39933000 | -2.67661500 | -3.28783000 | C  | -1.35898000 | -0.68729800 | 4.57649100  |
| H | -2.60791700 | -3.64918100 | -4.15191800 | H  | -1.74660300 | -1.45355300 | 5.24156600  |
| H | -1.41289600 | -4.43662000 | -3.10386600 | H  | -1.79999900 | 0.30136600  | 4.65689900  |

H 0.06918300 -1.94795000 3.69766900  
H 1.35432400 -0.07039900 2.82667600  
H -0.01171400 1.08539700 3.12620200

**(E)-2b**

C 2.25196900 0.17670800 0.35965400  
Br -1.60841200 -0.22909200 0.03171900  
C 1.19649000 0.33677200 -0.44596500  
H 1.22298600 -0.05237800 -1.46257500  
C -0.04654700 1.03675300 -0.04060200  
H 0.01208000 1.46667500 0.95816400  
H -0.37373600 1.78807800 -0.75874900  
H 2.19453900 0.56298500 1.37841600  
C 3.53313000 -0.50128400 -0.02147100  
H 3.50891200 -0.86022300 -1.05431300  
H 4.38810500 0.17804100 0.08527500  
H 3.73128100 -1.35864600 0.63390500

**L<sub>1</sub>-17<sub>3</sub>**

Cu 0.19450400 0.40251400 -0.74618200  
N -2.37135400 -0.91824400 -0.02300800  
N 2.67351900 0.06293200 -2.36658800  
N 2.09184600 2.14334400 -2.06774100  
O -4.77977800 -1.63240300 -0.12529900  
O -4.29556100 0.61333200 -0.09200100  
B -3.77650400 -0.67352400 -0.08268800  
C 1.76493500 0.86613800 -1.78198900  
C 3.66827700 0.80032400 -3.18098900  
H 4.68603100 0.53790000 -2.87981500  
C 3.31730700 2.26979100 -2.88790700  
H 4.10208700 2.78681000 -2.32536400  
C 1.35664000 3.30343100 -1.64439000  
C 1.73174700 3.97039000 -0.46409000  
C 1.01952400 5.11842400 -0.10088800  
H 1.30145700 5.63949000 0.81113100  
C -0.04066200 5.60836000 -0.87004100  
C -0.38206100 4.92209700 -2.03965600  
H -1.20252400 5.28874600 -2.65209800  
C 0.29967400 3.77140400 -2.44649200  
C -0.11464900 3.04332100 -3.70273700  
H -0.50647600 2.04728200 -3.46851100

C 2.84995600 3.45906100 0.41151900  
H 3.80247400 3.39845300 -0.12730600  
C 2.64464200 -1.37374900 -2.38866100  
C 3.51428700 -2.08796400 -1.54663600  
C 4.40769000 -1.38517800 -0.55283600  
H 5.12249000 -0.71263300 -1.04170500  
C 3.51985900 -3.48443100 -1.63611100  
H 4.18879400 -4.04604100 -0.98819300  
C 2.68949300 -4.17269700 -2.52403700  
C 1.83547900 -3.42873300 -3.34447400  
H 1.17735900 -3.94715700 -4.03775600  
C 1.79466400 -2.03370600 -3.29610200  
C 0.83927000 -1.27070300 -4.18226000  
H 1.33303700 -0.45419500 -4.72065400  
C -1.51308200 0.27076600 0.23904400  
H -2.03426200 1.11702400 -0.22238100  
C -1.78915200 -2.20351700 -0.10992500  
C -0.51030900 -2.45896500 0.42541400  
H 0.02784900 -1.66271800 0.92474500  
C 0.06682200 -3.72721800 0.33825700  
H 1.05952900 -3.88212200 0.75318300  
C -0.61055700 -4.78256200 -0.27176800  
H -0.16706500 -5.77318500 -0.32207500  
C -1.87648800 -4.53894300 -0.81021100  
H -2.42296700 -5.34135200 -1.30010500  
C -2.45612900 -3.27481300 -0.74098800  
H -3.43822000 -3.11352200 -1.16448900  
C -6.03322700 -0.94765100 -0.36939500  
C -7.13832000 -1.67964700 0.39014800  
H -7.25733400 -2.68871600 -0.01552500  
H -8.09588400 -1.15801600 0.28665600  
H -6.90240800 -1.77062000 1.45172800  
C -6.29757400 -1.01486800 -1.88061500  
H -5.51529800 -0.49479200 -2.44084900  
H -7.26462400 -0.57601400 -2.14528000  
H -6.29959400 -2.06281200 -2.19391700  
C -5.71910600 0.51153000 0.13955400  
C -6.41692900 1.63358600 -0.62789800  
H -6.11221000 2.60075300 -0.21747300  
H -7.50541800 1.55456800 -0.53486400  
H -6.15422700 1.62092900 -1.68732300  
C -5.94313400 0.68799100 1.64875400  
H -5.44567000 -0.10241500 2.21745600  
H -7.00673600 0.68954800 1.90708700

|    |             |             |             |    |             |                         |
|----|-------------|-------------|-------------|----|-------------|-------------------------|
| H  | -5.51021700 | 1.64281600  | 1.95898900  |    |             |                         |
| C  | -1.37322800 | 0.60859900  | 1.69848000  | Cu | -0.97441500 | -0.10584300 -0.53674700 |
| C  | -0.86110300 | 1.86920600  | 2.07662200  | N  | 1.99543100  | -1.24053400 -0.26712400 |
| H  | -0.57289900 | 2.57393100  | 1.29897500  | N  | -3.38080100 | 0.48708300 1.36996300   |
| C  | -0.72504900 | 2.23311700  | 3.41289300  | N  | -1.57244400 | 1.37339500 2.18940200   |
| H  | -0.33521800 | 3.21724600  | 3.66330800  | O  | 4.36508900  | -2.03574400 -0.45388900 |
| C  | -1.09566300 | 1.34761500  | 4.43332200  | O  | 4.00807700  | 0.22362700 -0.32769300  |
| H  | -0.99573200 | 1.63232000  | 5.47707300  | B  | 3.42737800  | -1.02508900 -0.36705900 |
| C  | -1.60969500 | 0.09971800  | 4.08124900  | C  | -2.04693900 | 0.61822000 1.16730000   |
| H  | -1.91698900 | -0.59884500 | 4.85644100  | C  | -3.86141400 | 1.10977500 2.62674000   |
| C  | -1.74632900 | -0.26505900 | 2.73737100  | H  | -4.71364200 | 1.76516000 2.43411200   |
| H  | -2.16108900 | -1.23682600 | 2.48914500  | C  | -2.62380600 | 1.86433900 3.11135300   |
| H  | 4.98599900  | -2.11067900 | 0.02443300  | H  | -2.72659400 | 2.95072600 3.01673000   |
| H  | 3.83140600  | -0.78240300 | 0.15606200  | C  | -0.21251900 | 1.75685200 2.46228000   |
| H  | 0.38628600  | -1.93530500 | -4.92215000 | C  | 0.29775800  | 2.96040500 1.92753200   |
| H  | 0.03071400  | -0.82492300 | -3.59180600 | C  | 1.61816300  | 3.30568000 2.22690600   |
| H  | 0.72301400  | 2.90486700  | -4.39544300 | H  | 2.02213800  | 4.22320700 1.80547500   |
| H  | -0.89550900 | 3.59679500  | -4.23028800 | C  | 2.42620000  | 2.52067000 3.05743900   |
| H  | 2.99961400  | 4.11967800  | 1.26870300  | C  | 1.86361800  | 1.38255600 3.63523500   |
| H  | 2.63589800  | 2.45810000  | 0.79925100  | H  | 2.45800600  | 0.78118800 4.31958400   |
| C  | 2.68390800  | -5.68131500 | -2.58008800 | C  | 0.54393600  | 0.99345300 3.37144600   |
| H  | 1.79267600  | -6.08099100 | -2.08176000 | C  | -0.03637600 | -0.17551300 4.13465300  |
| H  | 2.66708400  | -6.04426500 | -3.61311400 | H  | -0.92600700 | -0.58707000 3.65557600  |
| H  | 3.56157700  | -6.10594200 | -2.08479400 | C  | -0.55569100 | 3.88904200 1.10221600   |
| C  | -0.81557200 | 6.82890900  | -0.43307600 | H  | -1.37678300 | 4.30324800 1.70102700   |
| H  | -0.18524000 | 7.52392300  | 0.12974100  | C  | -4.32504700 | -0.29825500 0.62355100  |
| H  | -1.23436100 | 7.36560700  | -1.28958700 | C  | -5.25340800 | 0.35273600 -0.21403700  |
| H  | -1.65313500 | 6.54891600  | 0.21763600  | C  | -5.23220500 | 1.84715100 -0.41949200  |
| H  | 3.55141100  | 0.53887700  | -4.23889800 | H  | -5.45274400 | 2.39044400 0.50739600   |
| H  | 3.11450300  | 2.84980000  | -3.79350400 | C  | -6.20822800 | -0.43096100 -0.87224200 |
| C  | 1.49230200  | -2.22687400 | 4.13381500  | H  | -6.92375400 | 0.06373100 -1.52525700  |
| Br | 3.99930300  | 0.56591000  | 3.00330900  | C  | -6.27413200 | -1.81895900 -0.71407900 |
| C  | 2.57894700  | -1.51806100 | 4.46549700  | C  | -5.35901100 | -2.42664600 0.14996100  |
| H  | 3.46881400  | -2.02195900 | 4.84126400  | H  | -5.40560300 | -3.50203100 0.30618400  |
| C  | 2.63764000  | -0.04013100 | 4.37949500  | C  | -4.38609200 | -1.68863300 0.83372900  |
| H  | 1.70081600  | 0.41630300  | 4.06418900  | C  | -3.42350300 | -2.39314400 1.75789200  |
| H  | 3.00912200  | 0.43325100  | 5.28803600  | H  | -3.33861500 | -1.88627800 2.72519600  |
| H  | 0.61750200  | -1.69696000 | 3.75661600  | C  | 1.14764500  | -0.08378100 -0.56598100 |
| C  | 1.36675300  | -3.71556900 | 4.25489100  | H  | 1.07378200  | 0.61295700 0.27880700   |
| H  | 0.57133000  | -3.98491900 | 4.96177400  | C  | 1.54824700  | -2.34410200 0.51377600  |
| H  | 1.08469700  | -4.15908400 | 3.29235100  | C  | 0.53746000  | -2.20235300 1.47509800  |
| H  | 2.29784600  | -4.17881800 | 4.59531500  | H  | 0.08630700  | -1.23198700 1.62911100  |
|    |             |             |             | C  | 0.12232100  | -3.29483100 2.24208900  |
|    |             |             |             | H  | -0.65290200 | -3.15301700 2.99003500  |

**L<sub>1</sub>-TS18<sub>3</sub>**



|   |             |             |             |    |             |             |             |
|---|-------------|-------------|-------------|----|-------------|-------------|-------------|
| C | 0.42306800  | -0.52050400 | -3.93842000 | H  | 5.12259100  | 0.36428200  | 2.46417100  |
| H | -0.54584000 | -0.06443800 | -3.73330100 | H  | 6.74765300  | -0.20044900 | 2.01598000  |
| C | -0.96938000 | -3.98142100 | -0.44663500 | H  | 5.34512100  | -1.28237600 | 1.88209200  |
| H | -1.90610700 | -4.17049300 | -0.98356100 | C  | 1.64743200  | -0.48260400 | 1.68184600  |
| C | -4.33514400 | 0.19630900  | -0.65916300 | C  | 1.64647200  | -1.88801300 | 1.75312000  |
| C | -5.22066000 | -0.47839800 | 0.20378000  | H  | 1.28538900  | -2.45706700 | 0.90585500  |
| C | -5.01449300 | -1.92340600 | 0.58068400  | C  | 2.12085100  | -2.55268800 | 2.87979900  |
| H | -4.94945200 | -2.57735100 | -0.29650400 | H  | 2.10964500  | -3.63857900 | 2.90417900  |
| C | -6.29948600 | 0.23999800  | 0.73221200  | C  | 2.59046800  | -1.83268900 | 3.97950000  |
| H | -6.98893900 | -0.27390100 | 1.39798700  | H  | 2.94887300  | -2.35172200 | 4.86388400  |
| C | -6.51595800 | 1.58832800  | 0.43193300  | C  | 2.58667200  | -0.43606600 | 3.93440600  |
| C | -5.61781100 | 2.22442400  | -0.43120400 | H  | 2.94210000  | 0.13735300  | 4.78645700  |
| H | -5.77374000 | 3.27000900  | -0.68766400 | C  | 2.12757400  | 0.23062400  | 2.80108700  |
| C | -4.53104500 | 1.54774500  | -0.99476700 | H  | 2.13989500  | 1.31441400  | 2.78608700  |
| C | -3.59576600 | 2.26965600  | -1.93316400 | H  | -5.84349900 | -2.28007100 | 1.19747800  |
| H | -3.44745400 | 1.71974500  | -2.86933500 | H  | -4.08212500 | -2.04117400 | 1.14805700  |
| C | 1.14989600  | 0.19530900  | 0.46482800  | H  | -3.98766300 | 3.25856200  | -2.18539700 |
| H | 0.94197000  | -0.49540000 | -0.35899100 | H  | -2.60682200 | 2.40498500  | -1.48535200 |
| C | 1.45093900  | 2.31444000  | -0.84548400 | H  | 0.41739900  | -0.87585300 | -4.97608000 |
| C | 0.37215500  | 2.04469200  | -1.70024000 | H  | 1.17870400  | 0.26697200  | -3.86898100 |
| H | -0.11856500 | 1.08283800  | -1.65786900 | H  | -0.60691800 | -4.94248100 | -0.07208500 |
| C | -0.07183200 | 3.00599800  | -2.61341900 | H  | -1.21419400 | -3.34970400 | 0.41655900  |
| H | -0.89655000 | 2.76170300  | -3.27699200 | C  | -7.67591900 | 2.34281200  | 1.03867900  |
| C | 0.53515100  | 4.25688900  | -2.68965500 | H  | -7.39217400 | 2.80550300  | 1.99220600  |
| H | 0.18686200  | 4.99938800  | -3.40137500 | H  | -8.02112600 | 3.14514900  | 0.37948700  |
| C | 1.59794900  | 4.53840200  | -1.82733700 | H  | -8.52258200 | 1.67976700  | 1.24000500  |
| H | 2.07731500  | 5.51337800  | -1.85384300 | C  | 3.67354700  | -4.04373000 | -2.41722700 |
| C | 2.05030000  | 3.58932000  | -0.91568400 | H  | 3.63237800  | -5.11929000 | -2.22044500 |
| H | 2.86400400  | 3.83188300  | -0.24620600 | H  | 4.12521600  | -3.89386700 | -3.40253900 |
| C | 5.60546900  | 1.73904200  | 0.08278400  | H  | 4.35079100  | -3.60147700 | -1.67617400 |
| C | 6.59181200  | 2.43328500  | 1.01868900  | H  | -4.04705900 | -0.52794400 | -3.33154100 |
| H | 6.60955000  | 3.50598600  | 0.80506700  | H  | -2.18749200 | -1.88134400 | -3.98129900 |
| H | 7.60463400  | 2.04316700  | 0.87369100  | C  | -0.87570200 | 1.70357700  | 2.02324000  |
| H | 6.31432300  | 2.30159200  | 2.06571900  | Br | -1.71878900 | -1.73761900 | 2.38063500  |
| C | 5.90257000  | 2.11518600  | -1.37464600 | C  | -2.29538800 | 1.95436800  | 1.80965300  |
| H | 5.19781400  | 1.63605400  | -2.05984800 | H  | -2.53546600 | 2.74071600  | 1.09313100  |
| H | 6.91827300  | 1.83188400  | -1.66622300 | C  | -3.31238700 | 1.33138800  | 2.44795400  |
| H | 5.80112300  | 3.19761400  | -1.49048700 | H  | -3.12663300 | 0.52383900  | 3.14715000  |
| C | 5.43993400  | 0.18442200  | 0.30949600  | H  | -4.34174500 | 1.60659600  | 2.24737900  |
| C | 6.24519800  | -0.69679900 | -0.64409700 | H  | -0.64144500 | 1.06817000  | 2.87741600  |
| H | 6.04025900  | -1.74911400 | -0.42694600 | C  | -0.01174900 | 2.93606300  | 1.90116100  |
| H | 7.31989500  | -0.53022800 | -0.51565000 | H  | -0.11869100 | 3.53235800  | 2.81981900  |
| H | 5.98424500  | -0.50996000 | -1.68732700 | H  | 1.04729700  | 2.71480400  | 1.77844900  |
| C | 5.68501300  | -0.25097700 | 1.75892400  | H  | -0.32147100 | 3.56578400  | 1.06266200  |

**L<sub>1</sub>-TS20<sub>3</sub>**

|    |             |             |             |   |             |             |             |
|----|-------------|-------------|-------------|---|-------------|-------------|-------------|
| Cu | -1.08490100 | -0.36171500 | 0.76006000  | C | -1.20879100 | 3.88347100  | -0.38997000 |
| N  | 1.61720200  | 1.54982500  | 0.41844200  | H | -2.20007200 | 3.83733600  | -0.83073000 |
| N  | -3.06401000 | -0.70784200 | -1.57998800 | C | -0.69910700 | 5.09959000  | 0.06312100  |
| N  | -1.28579600 | -1.93279000 | -1.83040000 | H | -1.28535300 | 6.00955400  | -0.02578200 |
| O  | 3.55463000  | 2.76687300  | -0.54739600 | C | 0.57577300  | 5.13159000  | 0.63308300  |
| O  | 3.67496200  | 0.47333900  | -0.49091700 | H | 0.98852800  | 6.06937000  | 0.99475400  |
| B  | 2.92234600  | 1.58970200  | -0.18640500 | C | 1.32239800  | 3.96232900  | 0.76148800  |
| C  | -1.84075500 | -0.96941700 | -1.05608800 | H | 2.30575100  | 3.99264700  | 1.21470700  |
| C  | -3.43159500 | -1.59782000 | -2.70662800 | C | 4.72371200  | 2.41127100  | -1.32876500 |
| H  | -4.21755000 | -2.29390100 | -2.39253300 | C | 5.83093300  | 3.41906000  | -1.02534500 |
| C  | -2.10893700 | -2.30219300 | -3.00436800 | H | 5.53027900  | 4.41142800  | -1.37371600 |
| H  | -2.20886500 | -3.38672000 | -3.08399200 | H | 6.75854600  | 3.14660700  | -1.53969200 |
| C  | 0.04289800  | -2.47312500 | -1.74749100 | H | 6.03254300  | 3.48481900  | 0.04511500  |
| C  | 0.22537500  | -3.78710700 | -1.27057300 | C | 4.32125000  | 2.50185300  | -2.80703000 |
| C  | 1.52443300  | -4.30521600 | -1.25923800 | H | 3.53064900  | 1.78519700  | -3.04622000 |
| H  | 1.67709700  | -5.31295800 | -0.88004900 | H | 5.17078400  | 2.31824500  | -3.47185500 |
| C  | 2.62329200  | -3.57439600 | -1.71912700 | H | 3.93730900  | 3.50585100  | -3.00718800 |
| C  | 2.39716000  | -2.29529900 | -2.23247100 | C | 5.00650900  | 0.93718700  | -0.84514900 |
| H  | 3.23322900  | -1.71929500 | -2.61611700 | C | 5.58763400  | 0.00849500  | -1.90865300 |
| C  | 1.11939700  | -1.72872700 | -2.26554200 | H | 5.69664500  | -0.99869600 | -1.49666400 |
| C  | 0.92128800  | -0.35254900 | -2.85921800 | H | 6.57810300  | 0.35407800  | -2.22322600 |
| H  | 0.05437300  | -0.31270900 | -3.52648800 | H | 4.94826500  | -0.05206100 | -2.79101800 |
| C  | -0.92660900 | -4.63372900 | -0.78991500 | C | 5.86383200  | 0.87042000  | 0.42591900  |
| H  | -0.55932600 | -5.58813700 | -0.40379400 | H | 5.48498300  | 1.54573900  | 1.19731400  |
| C  | -4.04634500 | 0.23495800  | -1.12552800 | H | 6.90794900  | 1.12677800  | 0.22172400  |
| C  | -5.02498900 | -0.16444500 | -0.19719800 | H | 5.82444300  | -0.14532600 | 0.82697300  |
| C  | -5.04163600 | -1.55384300 | 0.39234200  | C | 1.97973000  | -0.42698000 | 1.89581500  |
| H  | -5.29640800 | -2.30431700 | -0.36660500 | C | 1.84314700  | -1.81953100 | 2.07284600  |
| C  | -6.01184100 | 0.76469400  | 0.15785400  | H | 1.07824300  | -2.35395100 | 1.52082200  |
| H  | -6.77063800 | 0.46630300  | 0.87773300  | C | 2.64485800  | -2.51004900 | 2.97613500  |
| C  | -6.05400000 | 2.05192000  | -0.38438300 | H | 2.50655700  | -3.58057000 | 3.09830400  |
| C  | -5.08838800 | 2.40010300  | -1.33543100 | C | 3.61578100  | -1.83731000 | 3.72402000  |
| H  | -5.12470000 | 3.38502300  | -1.79610700 | H | 4.24149200  | -2.37899000 | 4.42783900  |
| C  | -4.08883700 | 1.50626400  | -1.73126800 | C | 3.77455400  | -0.46167300 | 3.55292100  |
| C  | -3.12334300 | 1.88800200  | -2.82981000 | H | 4.53024200  | 0.07534600  | 4.12027700  |
| H  | -3.31530800 | 1.31251100  | -3.74414600 | C | 2.96852900  | 0.23410800  | 2.65190900  |
| C  | 1.11157700  | 0.26226400  | 0.91000900  | H | 3.12134500  | 1.29939800  | 2.51621200  |
| H  | 0.90298500  | -0.42485400 | 0.08417100  | H | -5.79691100 | -1.62571200 | 1.17944600  |
| C  | 0.81545000  | 2.73277200  | 0.30723000  | H | -4.07502900 | -1.83974400 | 0.82126400  |
| C  | -0.45299900 | 2.71276200  | -0.28359400 | H | -3.22690300 | 2.94528000  | -3.08652800 |
| H  | -0.85766900 | 1.76973800  | -0.63602200 | H | -2.08241100 | 1.70659000  | -2.55288400 |
|    |             |             |             | H | 1.80069400  | -0.05847500 | -3.43765500 |
|    |             |             |             | H | 0.76594300  | 0.40846700  | -2.08789600 |
|    |             |             |             | H | -1.47353700 | -4.12913800 | 0.01254000  |

|                                     |             |             |             |   |             |             |             |
|-------------------------------------|-------------|-------------|-------------|---|-------------|-------------|-------------|
| H                                   | -1.63256400 | -4.86194500 | -1.59830100 | H | -2.74411800 | -1.11570300 | -5.02272300 |
| C                                   | -7.10811800 | 3.04459800  | 0.04597300  | C | -2.50131500 | 0.43669200  | -3.56242300 |
| H                                   | -7.43680800 | 3.66836800  | -0.79132100 | C | -1.26619500 | 1.00011600  | -4.22408300 |
| H                                   | -7.98632600 | 2.54138100  | 0.46041800  | H | -1.32718800 | 2.08566900  | -4.35578700 |
| H                                   | -6.72229600 | 3.71982700  | 0.81987800  | C | -4.74656900 | 1.05914300  | -0.50568600 |
| C                                   | 4.01936800  | -4.14524500 | -1.64496800 | H | -5.04063500 | 2.10710000  | -0.63562900 |
| H                                   | 4.49562500  | -3.88197300 | -0.69238100 | C | 0.23862000  | 3.86453600  | -0.11751400 |
| H                                   | 4.01143900  | -5.23726300 | -1.71422200 | C | 0.15364900  | 4.01561800  | 1.27810700  |
| H                                   | 4.65565100  | -3.75791400 | -2.44677600 | C | -1.10876000 | 3.67443900  | 2.03198600  |
| H                                   | -3.81091700 | -1.01486800 | -3.55021100 | H | -1.98210600 | 4.21233800  | 1.64610200  |
| H                                   | -1.63025700 | -1.93729500 | -3.92178900 | C | 1.28884800  | 4.45761300  | 1.96140000  |
| C                                   | -0.67652400 | 0.78014000  | 2.62475200  | H | 1.24029200  | 4.56204400  | 3.04219500  |
| H                                   | -0.65889000 | -0.19544800 | 3.10750500  | C | 2.48783100  | 4.74150400  | 1.29980000  |
| Br                                  | -1.70068400 | -2.51974700 | 2.08676200  | C | 2.53259700  | 4.58816000  | -0.08847500 |
| C                                   | -2.00638100 | 1.27753100  | 2.25928800  | H | 3.45708800  | 4.80372500  | -0.61906600 |
| H                                   | -2.03587200 | 2.28661700  | 1.85372100  | C | 1.42309600  | 4.14979500  | -0.81789200 |
| C                                   | -3.17178400 | 0.62982000  | 2.48116500  | C | 1.51734900  | 3.95672800  | -2.31261100 |
| H                                   | -3.19263000 | -0.37591400 | 2.88639900  | H | 0.74608700  | 4.51715300  | -2.85344500 |
| H                                   | -4.11616900 | 1.11184900  | 2.25206700  | C | 0.97704700  | -0.99428900 | -0.55048300 |
| C                                   | 0.17176800  | 1.81184500  | 3.32344200  | H | 1.24760400  | -1.08960400 | -1.60808900 |
| H                                   | 1.19936200  | 1.48824100  | 3.47977200  | C | 2.29675800  | -0.11968700 | 1.40425800  |
| H                                   | 0.16040000  | 2.78196000  | 2.82496700  | C | 1.12836100  | 0.04254900  | 2.17482000  |
| H                                   | -0.26821400 | 1.94960200  | 4.32237900  | H | 0.19426400  | -0.38743700 | 1.83628200  |
| <b>L<sub>I</sub>-17<sub>4</sub></b> |             |             |             | C | 1.15612000  | 0.72725700  | 3.39071200  |
| Cu                                  | -0.17290300 | 0.60765200  | -0.67265700 | H | 0.23309400  | 0.81689100  | 3.95757500  |
| N                                   | 2.26662400  | -0.81938000 | 0.17443500  | C | 2.34400400  | 1.26828200  | 3.88074100  |
| N                                   | -0.91917200 | 3.43720900  | -0.85499600 | H | 2.36642900  | 1.78856000  | 4.83426700  |
| N                                   | -2.40432500 | 2.15653100  | -1.80953900 | C | 3.50825400  | 1.11602900  | 3.12278200  |
| O                                   | 4.65322800  | -1.60515800 | 0.18618700  | H | 4.44922200  | 1.52695500  | 3.48201000  |
| O                                   | 3.35260400  | -2.05807800 | -1.65385500 | C | 3.48960800  | 0.44367400  | 1.90295100  |
| B                                   | 3.40160900  | -1.46556600 | -0.39888700 | H | 4.40517900  | 0.33752200  | 1.33672500  |
| C                                   | -1.24740200 | 2.15795100  | -1.11228500 | C | 5.54664400  | -2.15771800 | -0.81084400 |
| C                                   | -1.91318100 | 4.41264700  | -1.35529100 | C | 6.53510100  | -3.08877000 | -0.11059900 |
| H                                   | -2.40149400 | 4.92114000  | -0.51648200 | H | 7.16644000  | -2.51084100 | 0.57091400  |
| C                                   | -2.88054800 | 3.51753000  | -2.14961400 | H | 7.18718100  | -3.58491700 | -0.83756100 |
| H                                   | -3.92458100 | 3.65201300  | -1.85472200 | H | 6.02058900  | -3.85190200 | 0.47595500  |
| C                                   | -3.02574600 | 0.99456200  | -2.38143400 | C | 6.29529400  | -0.97901100 | -1.45025600 |
| C                                   | -4.17953500 | 0.46579300  | -1.77342500 | H | 5.60338200  | -0.30165200 | -1.95908400 |
| C                                   | -4.78918600 | -0.64525500 | -2.36443800 | H | 7.04567300  | -1.31535100 | -2.17268600 |
| H                                   | -5.68086100 | -1.05993500 | -1.89958800 | H | 6.80547100  | -0.41486100 | -0.66424300 |
| C                                   | -4.28534000 | -1.23633800 | -3.52748700 | C | 4.54331400  | -2.86456700 | -1.80136600 |
| C                                   | -3.14486900 | -0.67749200 | -4.11162600 | C | 4.96045700  | -2.85016500 | -3.27128600 |
|                                     |             |             |             | H | 4.18729200  | -3.33429500 | -3.87514600 |
|                                     |             |             |             | H | 5.89718400  | -3.39837200 | -3.41865000 |



|    |             |             |             |
|----|-------------|-------------|-------------|
| H  | 5.08869700  | -1.83197900 | -3.64350000 |
| C  | 4.17703600  | -4.29262500 | -1.37155400 |
| H  | 3.86945900  | -4.32155500 | -0.32271700 |
| H  | 5.01067700  | -4.98772100 | -1.51208000 |
| H  | 3.33313600  | -4.63670200 | -1.97558400 |
| C  | 0.24530900  | -2.25977400 | -0.19522900 |
| C  | -0.80221100 | -2.71607200 | -1.02598100 |
| H  | -1.06990800 | -2.12981600 | -1.90309200 |
| C  | -1.49139500 | -3.89407800 | -0.75588300 |
| H  | -2.28568100 | -4.21609600 | -1.42571900 |
| C  | -1.16488300 | -4.66868700 | 0.36431000  |
| H  | -1.69965000 | -5.59068000 | 0.57441800  |
| C  | -0.13441700 | -4.23586900 | 1.19871400  |
| H  | 0.14674400  | -4.82765000 | 2.06741300  |
| C  | 0.55926000  | -3.05144400 | 0.92567400  |
| H  | 1.36602500  | -2.74486000 | 1.58331000  |
| H  | -1.00415700 | 3.92883400  | 3.08953600  |
| H  | -1.33220000 | 2.60431400  | 1.96636000  |
| H  | 2.49035700  | 4.28789800  | -2.68412800 |
| H  | 1.39556100  | 2.90126900  | -2.58053600 |
| H  | -1.11674000 | 0.55020300  | -5.20889600 |
| H  | -0.37214800 | 0.80032500  | -3.62219600 |
| H  | -5.63752200 | 0.50940600  | -0.19100200 |
| H  | -4.02377700 | 1.02689900  | 0.31614400  |
| C  | 3.71193200  | 5.16000500  | 2.07747400  |
| H  | 4.46367700  | 5.61994600  | 1.42969600  |
| H  | 3.46117500  | 5.87341300  | 2.86928700  |
| H  | 4.17271700  | 4.28864100  | 2.55791400  |
| C  | -4.94294200 | -2.45902100 | -4.12234900 |
| H  | -4.55219800 | -3.37667900 | -3.66538200 |
| H  | -6.02503500 | -2.45158400 | -3.95991000 |
| H  | -4.76039000 | -2.52869000 | -5.19866000 |
| H  | -1.42847900 | 5.17346400  | -1.97416000 |
| H  | -2.81201600 | 3.67825900  | -3.23212400 |
| C  | -3.13526000 | -1.82889100 | 2.04794900  |
| Br | -2.86849400 | 0.00315800  | 2.87715300  |
| C  | -3.93706300 | -2.69332300 | 2.94533800  |
| C  | -3.45301700 | -3.80024500 | 3.52098400  |
| H  | -2.41392300 | -4.07037300 | 3.33317700  |
| H  | -4.97151100 | -2.39736500 | 3.11682500  |
| H  | -3.62949500 | -1.59218500 | 1.10681600  |
| H  | -2.12991900 | -2.20076100 | 1.86252300  |
| C  | -4.23734300 | -4.72169200 | 4.40583900  |
| H  | -5.26690100 | -4.37680300 | 4.54012800  |

|   |             |             |            |
|---|-------------|-------------|------------|
| H | -4.26734100 | -5.73749200 | 3.99156300 |
| H | -3.77172000 | -4.80297500 | 5.39629900 |

#### L<sub>1</sub>-TS18<sub>4</sub>

|    |             |             |             |
|----|-------------|-------------|-------------|
| Cu | 0.86754300  | -0.36463900 | 0.37335300  |
| N  | -1.88462900 | 0.82438700  | 0.41941400  |
| N  | 0.62701400  | -2.79305800 | -1.47074100 |
| N  | 2.37088200  | -1.59309500 | -1.96822900 |
| O  | -4.26518600 | 1.38952000  | -0.14910700 |
| O  | -2.62426200 | 1.85969800  | -1.68826300 |
| B  | -2.90999100 | 1.33140700  | -0.43555300 |
| C  | 1.29982700  | -1.67220100 | -1.14556500 |
| C  | 1.24724200  | -3.56780500 | -2.57157500 |
| H  | 1.54008300  | -4.56242100 | -2.22020700 |
| C  | 2.45288200  | -2.69482600 | -2.95566200 |
| H  | 3.40642100  | -3.22456300 | -2.86633400 |
| C  | 3.31997600  | -0.51786400 | -2.00561200 |
| C  | 4.54775600  | -0.65375800 | -1.33065900 |
| C  | 5.46890500  | 0.39748800  | -1.41577400 |
| H  | 6.42050200  | 0.30021700  | -0.89794800 |
| C  | 5.20496100  | 1.55853100  | -2.14836600 |
| C  | 3.98455000  | 1.64979900  | -2.82600600 |
| H  | 3.76839100  | 2.53655800  | -3.41762200 |
| C  | 3.03313300  | 0.62575800  | -2.77574700 |
| C  | 1.73744000  | 0.75125800  | -3.54223400 |
| H  | 1.62878700  | -0.04557900 | -4.28735100 |
| C  | 4.87273400  | -1.88853100 | -0.52458800 |
| H  | 4.81598800  | -2.79914900 | -1.13149800 |
| C  | -0.60732500 | -3.24352900 | -0.88877800 |
| C  | -0.57857600 | -4.19567600 | 0.14783200  |
| C  | 0.72163100  | -4.71500200 | 0.71067600  |
| H  | 1.33803100  | -5.20007300 | -0.05569400 |
| C  | -1.79781600 | -4.64610000 | 0.66141300  |
| H  | -1.78624100 | -5.37238600 | 1.47076800  |
| C  | -3.02434400 | -4.18614700 | 0.17268500  |
| C  | -3.01474000 | -3.26338000 | -0.87587200 |
| H  | -3.95932900 | -2.90643900 | -1.28013300 |
| C  | -1.82201100 | -2.77803600 | -1.42199100 |
| C  | -1.86276400 | -1.76676100 | -2.54300100 |
| H  | -1.10318100 | -1.95969600 | -3.30660600 |
| C  | -0.49697800 | 1.18153100  | 0.03219800  |
| H  | -0.44748500 | 1.11635400  | -1.05663300 |
| C  | -2.14771100 | 0.16607200  | 1.64864100  |

|   |             |             |             |                                     |             |             |             |
|---|-------------|-------------|-------------|-------------------------------------|-------------|-------------|-------------|
| C | -1.20428800 | 0.17047800  | 2.69117500  | H                                   | 0.86905500  | 0.69046400  | -2.88008600 |
| H | -0.26350900 | 0.68939200  | 2.56059700  | H                                   | 5.88624100  | -1.82599700 | -0.11939400 |
| C | -1.45940400 | -0.49011500 | 3.89426500  | H                                   | 4.17481400  | -2.01093100 | 0.31090200  |
| H | -0.69959000 | -0.47665100 | 4.67070200  | C                                   | -4.32261700 | -4.65231800 | 0.78605200  |
| C | -2.66431100 | -1.15816100 | 4.10093800  | H                                   | -5.15504800 | -4.56728900 | 0.08103500  |
| H | -2.86322600 | -1.66627700 | 5.04008900  | H                                   | -4.26063000 | -5.69361900 | 1.11744700  |
| C | -3.61083200 | -1.16253000 | 3.07309300  | H                                   | -4.57096900 | -4.04426300 | 1.66459500  |
| H | -4.55951300 | -1.67656500 | 3.20960600  | C                                   | 6.20306500  | 2.69151800  | -2.19561600 |
| C | -3.35900500 | -0.52240100 | 1.86252300  | H                                   | 5.99236800  | 3.43544700  | -1.41718500 |
| H | -4.10431800 | -0.54654800 | 1.07933000  | H                                   | 7.22409200  | 2.33300300  | -2.03530400 |
| C | -4.95436200 | 1.82973000  | -1.34483000 | H                                   | 6.17239400  | 3.21234000  | -3.15754100 |
| C | -6.12418200 | 2.71820800  | -0.92481400 | H                                   | 0.53495200  | -3.69770300 | -3.39292900 |
| H | -6.84505200 | 2.12815500  | -0.35132700 | H                                   | 2.38274800  | -2.29887600 | -3.97502600 |
| H | -6.64043300 | 3.12613000  | -1.80045700 | C                                   | 2.79345200  | 1.07289500  | 1.70635800  |
| H | -5.79265300 | 3.54621900  | -0.29617700 | Br                                  | 2.17810000  | -1.52708900 | 2.21640600  |
| C | -5.47769000 | 0.57259300  | -2.05431000 | C                                   | 2.91671500  | 1.45160800  | 3.06971200  |
| H | -4.65372500 | -0.07866500 | -2.35895500 | C                                   | 2.13569500  | 2.40871000  | 3.63940000  |
| H | -6.06990500 | 0.82085300  | -2.94045200 | H                                   | 1.36805700  | 2.88659000  | 3.03366700  |
| H | -6.11410900 | 0.01428700  | -1.36182700 | H                                   | 3.67746600  | 0.95565200  | 3.66880900  |
| C | -3.80660700 | 2.56078100  | -2.14321100 | H                                   | 3.61559200  | 0.58125800  | 1.20637400  |
| C | -3.89037700 | 2.43757700  | -3.66384500 | H                                   | 2.08912500  | 1.60815400  | 1.08162100  |
| H | -3.03675400 | 2.94805700  | -4.11939600 | C                                   | 2.25572900  | 2.86236300  | 5.05494700  |
| H | -4.80491400 | 2.90482600  | -4.04443100 | H                                   | 3.05414300  | 2.34215600  | 5.59108900  |
| H | -3.87044100 | 1.39502600  | -3.98678900 | H                                   | 2.44336000  | 3.94296500  | 5.10425500  |
| C | -3.63602000 | 4.03382900  | -1.74391000 | H                                   | 1.31088700  | 2.69389400  | 5.58922400  |
| H | -3.56188600 | 4.14373300  | -0.65862800 |                                     |             |             |             |
| H | -4.46434900 | 4.65231100  | -2.10337000 | <b>L<sub>1</sub>-19<sub>4</sub></b> |             |             |             |
| H | -2.70723200 | 4.41156800  | -2.17986700 |                                     |             |             |             |
| C | -0.09642600 | 2.55566000  | 0.42355000  | Cu                                  | 1.17890500  | -0.45006000 | 0.67384300  |
| C | 0.98463100  | 3.19178500  | -0.23489000 | N                                   | -1.33825400 | 0.92329800  | 0.51148400  |
| H | 1.49383900  | 2.66331500  | -1.03803900 | N                                   | 0.01667400  | -2.72227700 | -1.33885200 |
| C | 1.39828600  | 4.47738900  | 0.10649000  | N                                   | 1.91701500  | -1.79676500 | -1.86559700 |
| H | 2.22867200  | 4.93156300  | -0.42897800 | O                                   | -3.59493800 | 1.86678000  | -0.02241800 |
| C | 0.74892900  | 5.18688400  | 1.12128900  | O                                   | -1.90615300 | 2.13050400  | -1.56070500 |
| H | 1.06739700  | 6.19103900  | 1.38571700  | B                                   | -2.27775300 | 1.60100600  | -0.33448800 |
| C | -0.33056100 | 4.58573300  | 1.77490200  | C                                   | 0.84845700  | -1.70416700 | -1.03652900 |
| H | -0.86188000 | 5.12812700  | 2.55376600  | C                                   | 0.55799400  | -3.63900500 | -2.37420100 |
| C | -0.74484300 | 3.29596200  | 1.43876600  | H                                   | 0.75293500  | -4.62204800 | -1.93432400 |
| H | -1.59214700 | 2.85711800  | 1.95465300  | C                                   | 1.84296400  | -2.92907600 | -2.81638100 |
| H | 0.53056400  | -5.45353800 | 1.49347400  | H                                   | 2.72796700  | -3.56471000 | -2.73012000 |
| H | 1.31439400  | -3.90341200 | 1.14582700  | C                                   | 2.97166100  | -0.82875600 | -2.00261400 |
| H | -2.84001500 | -1.78073800 | -3.03402200 | C                                   | 4.24767900  | -1.10303400 | -1.46734500 |
| H | -1.69465300 | -0.75127700 | -2.16959000 | C                                   | 5.25434700  | -0.14546900 | -1.63288600 |
| H | 1.69275000  | 1.70614600  | -4.07188900 | H                                   | 6.23583200  | -0.34627000 | -1.20964900 |

|   |             |             |             |    |             |             |             |
|---|-------------|-------------|-------------|----|-------------|-------------|-------------|
| C | 5.04224400  | 1.04760300  | -2.32967400 | H  | -2.14996100 | 3.36573700  | -3.94178500 |
| C | 3.78511000  | 1.25908600  | -2.90200900 | H  | -3.89145500 | 3.65993300  | -3.82583500 |
| H | 3.61175900  | 2.15826100  | -3.48944200 | H  | -3.26609800 | 1.99810500  | -3.84249300 |
| C | 2.74111700  | 0.33680600  | -2.76234700 | C  | -2.49141700 | 4.45521200  | -1.51677000 |
| C | 1.42422000  | 0.60708900  | -3.45518700 | H  | -2.36775400 | 4.50603000  | -0.43186200 |
| H | 0.94649000  | -0.31105300 | -3.80496500 | H  | -3.19808900 | 5.23078900  | -1.82731100 |
| C | 4.55629200  | -2.39958500 | -0.75891900 | H  | -1.51999000 | 4.67043500  | -1.96977700 |
| H | 4.61777600  | -3.23393000 | -1.46969200 | C  | 0.47369900  | 2.62571100  | 0.63328000  |
| C | -1.34789100 | -2.91950000 | -0.92435600 | C  | 1.48869200  | 3.29369500  | -0.08417000 |
| C | -1.67179900 | -3.90045700 | 0.03109900  | H  | 1.98184100  | 2.77820100  | -0.90511300 |
| C | -0.62219900 | -4.75466000 | 0.69617700  | C  | 1.86246100  | 4.59773200  | 0.23027800  |
| H | -0.26413400 | -5.53771700 | 0.01400300  | H  | 2.64434000  | 5.08643200  | -0.34518100 |
| C | -3.02444200 | -4.11296400 | 0.32352900  | C  | 1.22744400  | 5.28202800  | 1.27159700  |
| H | -3.27956400 | -4.85912000 | 1.07240100  | H  | 1.51346700  | 6.30131300  | 1.51469200  |
| C | -4.04745500 | -3.41621400 | -0.32246400 | C  | 0.21365700  | 4.64188200  | 1.98558000  |
| C | -3.69215600 | -2.48902400 | -1.30669400 | H  | -0.29583600 | 5.16291900  | 2.79199000  |
| H | -4.47363200 | -1.96351900 | -1.85101300 | C  | -0.15726100 | 3.33154500  | 1.67527400  |
| C | -2.35623500 | -2.22956600 | -1.62649300 | H  | -0.95593700 | 2.85864400  | 2.23571200  |
| C | -2.02377100 | -1.25607300 | -2.73242400 | H  | -1.03971100 | -5.25902500 | 1.57160200  |
| H | -1.30004200 | -1.67377900 | -3.44056100 | H  | 0.24047600  | -4.16766100 | 1.01895200  |
| C | 0.06944100  | 1.25028700  | 0.22402400  | H  | -2.92423400 | -1.00194300 | -3.29846800 |
| H | 0.22265700  | 1.15002400  | -0.84771900 | H  | -1.59867300 | -0.32476300 | -2.34801500 |
| C | -1.73846400 | 0.26665300  | 1.71049100  | H  | 1.58190900  | 1.25616800  | -4.32139200 |
| C | -0.91718300 | 0.24292200  | 2.84782900  | H  | 0.70169600  | 1.11135500  | -2.80430200 |
| H | 0.04331100  | 0.74062600  | 2.83960000  | H  | 5.52387300  | -2.33686600 | -0.25412000 |
| C | -1.32740800 | -0.41748700 | 4.00783200  | H  | 3.79701700  | -2.64891000 | -0.01239100 |
| H | -0.66420000 | -0.42643200 | 4.86813900  | C  | -5.49555100 | -3.65262100 | 0.03552200  |
| C | -2.56484500 | -1.05399600 | 4.06732500  | H  | -6.15756200 | -3.44578800 | -0.81100600 |
| H | -2.88224800 | -1.56407900 | 4.97201500  | H  | -5.66603500 | -4.68456100 | 0.35701300  |
| C | -3.38625500 | -1.03212200 | 2.93749200  | H  | -5.80840100 | -3.00036400 | 0.86058500  |
| H | -4.35134900 | -1.53189000 | 2.95679200  | C  | 6.14004700  | 2.07658600  | -2.46058100 |
| C | -2.97970900 | -0.39201300 | 1.77040400  | H  | 6.12955200  | 2.77263700  | -1.61262300 |
| H | -3.62046400 | -0.40555900 | 0.89880300  | H  | 7.12834000  | 1.60755400  | -2.48177600 |
| C | -4.20421600 | 2.52480000  | -1.16275600 | H  | 6.02544300  | 2.67146600  | -3.37169300 |
| C | -5.14461100 | 3.61020600  | -0.63964200 | H  | -0.16541400 | -3.76510300 | -3.18526200 |
| H | -5.95783300 | 3.14782600  | -0.07285500 | H  | 1.79401800  | -2.55347800 | -3.84559100 |
| H | -5.58629000 | 4.17570300  | -1.46700200 | C  | 2.61501400  | 0.66539000  | 1.62490000  |
| H | -4.62697700 | 4.30578200  | 0.02281900  | Br | 1.95847000  | -2.42625800 | 1.92930200  |
| C | -5.00835600 | 1.46264400  | -1.92323000 | C  | 2.51824700  | 0.80591700  | 3.06773100  |
| H | -4.35941700 | 0.66924900  | -2.30160000 | C  | 2.38235500  | 1.98582600  | 3.71294900  |
| H | -5.55666700 | 1.89514500  | -2.76572500 | H  | 2.33361100  | 2.90410100  | 3.13001900  |
| H | -5.73149600 | 1.01069500  | -1.23853700 | H  | 2.57129800  | -0.11458400 | 3.64658000  |
| C | -2.94736800 | 3.05905300  | -1.96227900 | H  | 3.36079400  | -0.06163500 | 1.30253900  |
| C | -3.07805200 | 3.01163400  | -3.48351100 | H  | 2.66809400  | 1.60121700  | 1.07833500  |

|                                       |             |             |             |   |             |             |             |
|---------------------------------------|-------------|-------------|-------------|---|-------------|-------------|-------------|
| C                                     | 2.31551100  | 2.13587300  | 5.20241500  | H | 0.18374700  | 1.11209200  | -1.00069100 |
| H                                     | 2.36965700  | 1.16815600  | 5.71015300  | C | -1.54078800 | 0.56515100  | 1.82300900  |
| H                                     | 3.13436900  | 2.76470700  | 5.57708500  | C | -0.89688300 | 1.09138200  | 2.94991400  |
| H                                     | 1.38362900  | 2.63092800  | 5.50690600  | H | -0.13088000 | 1.84638500  | 2.83399100  |
| <b>L<sub>1</sub>-TS20<sub>4</sub></b> |             |             |             | C | -1.21532400 | 0.62440900  | 4.22540800  |
| Cu                                    | 1.01360700  | -0.50071600 | 0.53887300  | H | -0.69386500 | 1.03606700  | 5.08494200  |
| N                                     | -1.28515100 | 1.03396200  | 0.49402100  | C | -2.18522200 | -0.36052700 | 4.40150800  |
| N                                     | 0.22030000  | -2.93070100 | -1.23594600 | H | -2.42970000 | -0.72033100 | 5.39657100  |
| N                                     | 2.16806300  | -2.06741100 | -1.67039400 | C | -2.82120800 | -0.89509200 | 3.27946500  |
| O                                     | -3.68760000 | 1.53253200  | 0.05743000  | H | -3.56309400 | -1.68055400 | 3.39426000  |
| O                                     | -2.21511300 | 1.66830900  | -1.70578500 | C | -2.49686400 | -0.44740900 | 2.00171400  |
| B                                     | -2.38543000 | 1.37659300  | -0.36285800 | H | -2.97524400 | -0.88786000 | 1.13420000  |
| C                                     | 1.03696100  | -1.89768500 | -0.94478600 | C | -4.49882600 | 1.84866000  | -1.10230500 |
| C                                     | 0.80963100  | -3.91013100 | -2.18162900 | C | -5.52702600 | 2.90141700  | -0.68821900 |
| H                                     | 0.92289800  | -4.88341700 | -1.69335500 | H | -6.19960700 | 2.47799400  | 0.06311800  |
| C                                     | 2.15588400  | -3.26508300 | -2.53878200 | H | -6.13142300 | 3.21706600  | -1.54532900 |
| H                                     | 3.00951800  | -3.91219600 | -2.31630800 | H | -5.04957000 | 3.78111300  | -0.25363400 |
| C                                     | 3.28425000  | -1.16541000 | -1.70003900 | C | -5.21488700 | 0.55825200  | -1.51929700 |
| C                                     | 4.40586700  | -1.42004800 | -0.88829200 | H | -4.49908800 | -0.21687100 | -1.80140800 |
| C                                     | 5.48305000  | -0.52811600 | -0.95795600 | H | -5.89869400 | 0.72627300  | -2.35692600 |
| H                                     | 6.35139600  | -0.71272500 | -0.32992200 | H | -5.79442600 | 0.18683200  | -0.66962500 |
| C                                     | 5.47482200  | 0.58573100  | -1.80239100 | C | -3.42256300 | 2.34284300  | -2.15374200 |
| C                                     | 4.35416400  | 0.79261100  | -2.61426800 | C | -3.69615600 | 1.93795700  | -3.60125200 |
| H                                     | 4.33744600  | 1.64150500  | -3.29445400 | H | -2.88034300 | 2.28979500  | -4.23951200 |
| C                                     | 3.25475200  | -0.07068700 | -2.58542700 | H | -4.62547900 | 2.39073600  | -3.96246800 |
| C                                     | 2.07443700  | 0.16976000  | -3.49823000 | H | -3.76996300 | 0.85502300  | -3.71442900 |
| H                                     | 1.94435200  | -0.64885500 | -4.21621400 | C | -3.14275200 | 3.85013400  | -2.07842500 |
| C                                     | 4.45368600  | -2.59943600 | 0.05208600  | H | -2.92003500 | 4.16585100  | -1.05610200 |
| H                                     | 4.25585100  | -3.54465100 | -0.46563100 | H | -3.98828900 | 4.43646800  | -2.45072300 |
| C                                     | -1.11562900 | -3.16501800 | -0.76064400 | H | -2.26713400 | 4.07814000  | -2.69210800 |
| C                                     | -1.32365400 | -3.98791500 | 0.36245300  | C | 0.17980100  | 2.97848500  | -0.00622700 |
| C                                     | -0.17617100 | -4.56247900 | 1.15285400  | C | 0.96780900  | 3.58774000  | -1.00442200 |
| H                                     | 0.52010600  | -5.11920400 | 0.51499100  | H | 1.45887600  | 2.96225700  | -1.74617500 |
| C                                     | -2.64340200 | -4.26520500 | 0.73771200  | C | 1.11075700  | 4.97064600  | -1.07355200 |
| H                                     | -2.81298000 | -4.88947400 | 1.61175800  | H | 1.71839000  | 5.41057000  | -1.85979300 |
| C                                     | -3.73995000 | -3.77983600 | 0.02079700  | C | 0.46099600  | 5.79228000  | -0.14667800 |
| C                                     | -3.49468700 | -2.98574000 | -1.10418600 | H | 0.56725300  | 6.87185400  | -0.20097500 |
| H                                     | -4.33468800 | -2.61607000 | -1.68749400 | C | -0.33559200 | 5.20910400  | 0.83844200  |
| C                                     | -2.19552700 | -2.66621300 | -1.51314200 | H | -0.85494600 | 5.83476900  | 1.55930900  |
| C                                     | -1.97893600 | -1.80045000 | -2.73274200 | C | -0.47492200 | 3.82078400  | 0.91041200  |
| H                                     | -1.17311100 | -2.17564000 | -3.37072000 | H | -1.11771900 | 3.38990800  | 1.66913900  |
| C                                     | 0.02076300  | 1.49658300  | 0.00499500  | H | -0.54628500 | -5.25121200 | 1.91681300  |
|                                       |             |             |             | H | 0.39934500  | -3.77367300 | 1.65147100  |
|                                       |             |             |             | H | -2.88885900 | -1.76017600 | -3.33871900 |

|                                     |             |             |             |    |             |                         |
|-------------------------------------|-------------|-------------|-------------|----|-------------|-------------------------|
| H                                   | -1.72070900 | -0.77244700 | -2.45646800 |    |             |                         |
| H                                   | 2.21174900  | 1.08930000  | -4.07331900 | Cu | -0.12029500 | 0.02931700 -0.92471700  |
| H                                   | 1.13601500  | 0.25300500  | -2.94180900 | N  | 2.41603500  | -0.43167900 0.48605000  |
| H                                   | 5.44019700  | -2.67714600 | 0.51643000  | N  | -1.34532200 | 2.41559900 -2.10245700  |
| H                                   | 3.70755800  | -2.49956300 | 0.85017700  | N  | -2.58886600 | 0.65040900 -2.40618100  |
| C                                   | -5.15148000 | -4.14091200 | 0.42131500  | O  | 4.89073100  | -0.51897600 0.91599400  |
| H                                   | -5.85761200 | -3.34633700 | 0.16194200  | O  | 4.00131700  | -1.89544000 -0.69557200 |
| H                                   | -5.48641000 | -5.05306300 | -0.08873100 | B  | 3.73676000  | -0.91864000 0.25433600  |
| H                                   | -5.22706000 | -4.32447000 | 1.49707100  | C  | -1.44871100 | 1.09903200 -1.84257800  |
| C                                   | 6.63693100  | 1.55046900  | -1.82527200 | C  | -2.48658200 | 2.95617200 -2.87469100  |
| H                                   | 6.49402300  | 2.35585400  | -1.09412100 | H  | -3.03367000 | 3.69455900 -2.27896100  |
| H                                   | 7.57730900  | 1.05001400  | -1.57620000 | C  | -3.31855800 | 1.69289100 -3.16393000  |
| H                                   | 6.75015700  | 2.01928100  | -2.80756200 | H  | -4.35179800 | 1.77459400 -2.81438600  |
| H                                   | 0.15463900  | -4.04297000 | -3.04837200 | C  | -3.03516700 | -0.71463000 -2.40909000 |
| H                                   | 2.22135900  | -2.97183600 | -3.59287800 | C  | -4.01163400 | -1.11708800 -1.48014900 |
| C                                   | 2.19033700  | 1.26828700  | 0.89670800  | C  | -4.46738200 | -2.43846700 -1.53191800 |
| Br                                  | 1.71760900  | -1.69226900 | 2.59381800  | H  | -5.22646000 | -2.75702300 -0.82106700 |
| C                                   | 2.28484400  | 1.85036400  | 2.22569000  | C  | -3.97558800 | -3.35622200 -2.46569300 |
| C                                   | 2.45255800  | 3.16781100  | 2.46484800  | C  | -3.00721900 | -2.92033200 -3.37517000 |
| H                                   | 2.50023000  | 3.85791200  | 1.62345900  | H  | -2.61651400 | -3.61802200 -4.11225900 |
| H                                   | 2.24551700  | 1.14616200  | 3.05442600  | C  | -2.52476100 | -1.60758800 -3.36901000 |
| H                                   | 2.78186500  | 0.34944000  | 0.80258200  | C  | -1.46797300 | -1.17842400 -4.35859000 |
| H                                   | 2.39485400  | 1.93726100  | 0.07115400  | H  | -1.76381600 | -0.28243000 -4.91548300 |
| C                                   | 2.61266800  | 3.76920200  | 3.82835900  | C  | -4.54467700 | -0.16570300 -0.43613400 |
| H                                   | 3.58066100  | 4.27832800  | 3.92683700  | H  | -4.99768500 | 0.72722700 -0.88154700  |
| H                                   | 1.84376900  | 4.53077900  | 4.01415300  | C  | -0.27810400 | 3.26632700 -1.65083800  |
| H                                   | 2.54446700  | 3.01219800  | 4.61507700  | C  | -0.39956500 | 3.92628600 -0.41438600  |
|                                     |             |             |             | C  | -1.60576900 | 3.72580800 0.47066100   |
| <b>(Z)-2b</b>                       |             |             |             | H  | -2.54090800 | 3.98733000 -0.03818500  |
|                                     |             |             |             | C  | 0.64709500  | 4.75603300 -0.00682800  |
| C                                   | 2.33906600  | 0.44088200  | -0.39725200 | H  | 0.57328400  | 5.25459000 0.95607200   |
| Br                                  | -1.50821200 | -0.15929300 | -0.12708500 | C  | 1.79268100  | 4.94076200 -0.78772900  |
| C                                   | 1.15871900  | 0.98081000  | -0.06318800 | C  | 1.87224400  | 4.28074800 -2.01671800  |
| H                                   | 0.88768400  | 1.94289200  | -0.49220300 | H  | 2.75492500  | 4.41501300 -2.63769200  |
| C                                   | 0.15457700  | 0.39656900  | 0.86034300  | C  | 0.85167400  | 3.43754400 -2.46830600  |
| H                                   | 0.48465100  | -0.50564700 | 1.36863500  | C  | 0.98489300  | 2.71451200 -3.78767500  |
| H                                   | -0.22048400 | 1.11877500  | 1.58454100  | H  | 0.14433200  | 2.92238500 -4.45988400  |
| H                                   | 2.97041500  | 1.01743300  | -1.07267600 | C  | 1.31862000  | -1.13681200 -0.23536000 |
| C                                   | 2.91567100  | -0.87370000 | 0.03899200  | H  | 1.75737000  | -1.46925700 -1.18315000 |
| H                                   | 3.13845700  | -1.49841100 | -0.83453400 | C  | 2.10659900  | 0.60745100 1.39402900   |
| H                                   | 3.86596600  | -0.72462900 | 0.56662500  | C  | 0.82478200  | 0.70610300 1.97288500   |
| H                                   | 2.25253900  | -1.44254100 | 0.69422600  | H  | 0.07676600  | -0.04341700 1.74424500  |
|                                     |             |             |             | C  | 0.51009000  | 1.74002100 2.85760500   |
| <b>L<sub>1</sub>-17<sub>5</sub></b> |             |             |             | H  | -0.49239600 | 1.78764600 3.27570700   |

|   |             |             |             |                                       |             |             |             |
|---|-------------|-------------|-------------|---------------------------------------|-------------|-------------|-------------|
| C | 1.46152900  | 2.69908800  | 3.20372000  | H                                     | 3.48193600  | 5.29160400  | 0.50190100  |
| H | 1.21809000  | 3.49665100  | 3.90004000  | H                                     | 3.63189100  | 6.04416300  | -1.09194300 |
| C | 2.73693700  | 2.60670800  | 2.64053000  | H                                     | 2.55829800  | 6.74745200  | 0.12981700  |
| H | 3.49768800  | 3.34170200  | 2.89394700  | C                                     | -4.45774500 | -4.78753700 | -2.47282300 |
| C | 3.05688600  | 1.58813900  | 1.74588100  | H                                     | -4.38184600 | -5.23162200 | -3.46973400 |
| H | 4.05083700  | 1.54024700  | 1.32202400  | H                                     | -3.85822200 | -5.40626500 | -1.79361400 |
| C | 6.01810400  | -1.12154000 | 0.23343200  | H                                     | -5.49915000 | -4.86181200 | -2.14534000 |
| C | 7.08589300  | -1.45891400 | 1.27263000  | H                                     | -2.13347400 | 3.45180700  | -3.78422500 |
| H | 7.46503300  | -0.53720800 | 1.72403000  | H                                     | -3.34277500 | 1.43691500  | -4.22927800 |
| H | 7.93023500  | -1.98256900 | 0.81152600  | C                                     | -2.56299700 | -2.08399700 | 3.05381400  |
| H | 6.68187400  | -2.08241100 | 2.07176900  | H                                     | -1.62983700 | -2.56018200 | 2.75898200  |
| C | 6.55607000  | -0.08083200 | -0.75932100 | Br                                    | -3.84473200 | 1.59603400  | 3.25623800  |
| H | 5.80178600  | 0.17272100  | -1.50961300 | C                                     | -2.47090800 | -0.93519700 | 3.74226700  |
| H | 7.45353400  | -0.43665300 | -1.27486900 | H                                     | -1.48017600 | -0.53708700 | 3.94945800  |
| H | 6.81295500  | 0.83148000  | -0.21332000 | C                                     | -3.60289400 | -0.14236900 | 4.27525900  |
| C | 5.35152200  | -2.36271500 | -0.47422200 | H                                     | -4.57183400 | -0.62913200 | 4.19850800  |
| C | 5.95759500  | -2.74821900 | -1.82293100 | H                                     | -3.43782000 | 0.20730300  | 5.29340200  |
| H | 5.40640700  | -3.59525800 | -2.24179000 | C                                     | -3.80294200 | -2.81612600 | 2.63406800  |
| H | 7.00523100  | -3.04804500 | -1.71191200 | H                                     | -3.80009100 | -2.95552400 | 1.54634600  |
| H | 5.90298200  | -1.92555000 | -2.53833100 | H                                     | -3.82107700 | -3.82147700 | 3.07365100  |
| C | 5.25952400  | -3.59801300 | 0.43378400  | H                                     | -4.73054200 | -2.30850800 | 2.91118200  |
| H | 4.82571100  | -3.34372200 | 1.40470700  |                                       |             |             |             |
| H | 6.23954400  | -4.05722900 | 0.59759700  |                                       |             |             |             |
| H | 4.60538900  | -4.33498100 | -0.03981500 | <b>L<sub>1</sub>-TS18<sub>5</sub></b> |             |             |             |
| C | 0.83638100  | -2.38194900 | 0.45919800  | Cu                                    | 0.90468900  | -0.45738500 | 0.60685600  |
| C | 0.03107000  | -3.30480300 | -0.24269000 | N                                     | -1.90612700 | 0.69422300  | 0.57994300  |
| H | -0.24449900 | -3.08404600 | -1.27213100 | N                                     | 1.13289800  | -2.12877500 | -1.99496700 |
| C | -0.41212000 | -4.48515500 | 0.34545500  | N                                     | 2.67655200  | -0.59710100 | -1.93901700 |
| H | -1.02234200 | -5.17575900 | -0.23263800 | O                                     | -4.24599100 | 1.28420900  | -0.04140700 |
| C | -0.07095500 | -4.79255200 | 1.66849200  | O                                     | -2.52324000 | 2.26125100  | -1.21931400 |
| H | -0.41220700 | -5.71607800 | 2.12809000  | B                                     | -2.87255100 | 1.39465400  | -0.19347300 |
| C | 0.72184500  | -3.89293500 | 2.38094700  | C                                     | 1.59497400  | -1.07527500 | -1.28536300 |
| H | 1.00540300  | -4.11383100 | 3.40766200  | C                                     | 1.88360600  | -2.38021900 | -3.24845100 |
| C | 1.16724400  | -2.70666400 | 1.78770700  | H                                     | 2.22097100  | -3.41897600 | -3.29485400 |
| H | 1.79401600  | -2.02844000 | 2.35774400  | C                                     | 3.04110900  | -1.38053200 | -3.14461900 |
| H | -1.53166300 | 4.34613300  | 1.36661400  | H                                     | 4.00918100  | -1.87107900 | -2.99708200 |
| H | -1.69143600 | 2.68506900  | 0.79752000  | C                                     | 3.44783200  | 0.57132000  | -1.61460000 |
| H | 1.90191400  | 3.01481900  | -4.30079300 | C                                     | 4.63394700  | 0.44876000  | -0.86584800 |
| H | 1.01974900  | 1.62918700  | -3.64233400 | C                                     | 5.38617600  | 1.60483900  | -0.62850500 |
| H | -1.27134300 | -1.97244500 | -5.08338000 | H                                     | 6.29882200  | 1.51919000  | -0.04320600 |
| H | -0.52607800 | -0.94350100 | -3.85013200 | C                                     | 5.00884300  | 2.85488700  | -1.12724900 |
| H | -5.31065700 | -0.65170100 | 0.17282000  | C                                     | 3.84730000  | 2.93296600  | -1.90141900 |
| H | -3.75439600 | 0.17952700  | 0.23786300  | H                                     | 3.54665000  | 3.89181400  | -2.31731200 |
| C | 2.92607400  | 5.80580700  | -0.29123400 | C                                     | 3.05598900  | 1.80888400  | -2.16127000 |

|   |             |             |             |    |             |             |             |
|---|-------------|-------------|-------------|----|-------------|-------------|-------------|
| C | 1.81510900  | 1.93930400  | -3.01326000 | H  | -3.77883800 | 4.12047900  | 0.24632800  |
| H | 1.83664700  | 1.26066900  | -3.87351300 | H  | -4.58744300 | 4.92402200  | -1.11691500 |
| C | 5.11437600  | -0.88436400 | -0.34713300 | H  | -2.81506900 | 4.83844000  | -1.04618600 |
| H | 5.36681300  | -1.56714500 | -1.16786900 | C  | -0.14602100 | 2.38550400  | 1.06002200  |
| C | -0.08295500 | -2.85882800 | -1.76191700 | C  | 1.00933200  | 3.08742200  | 0.65329200  |
| C | -0.02033300 | -4.15039500 | -1.20209600 | H  | 1.65162500  | 2.65136500  | -0.10517800 |
| C | 1.29156500  | -4.78897600 | -0.81590800 | C  | 1.34547600  | 4.32314900  | 1.19900200  |
| H | 1.90963400  | -5.00607100 | -1.69628500 | H  | 2.23950600  | 4.83441800  | 0.84980700  |
| C | -1.21880200 | -4.84812600 | -1.01943400 | C  | 0.54346800  | 4.90708800  | 2.18550000  |
| H | -1.18037600 | -5.84049500 | -0.57596500 | H  | 0.80470700  | 5.87091800  | 2.61294100  |
| C | -2.45589800 | -4.31339000 | -1.39241900 | C  | -0.60100100 | 4.22955700  | 2.60495200  |
| C | -2.47488500 | -3.05250400 | -1.99306100 | H  | -1.24234600 | 4.66691500  | 3.36659800  |
| H | -3.42412200 | -2.62905200 | -2.31308900 | C  | -0.94284400 | 2.99331900  | 2.05053300  |
| C | -1.30622900 | -2.30994800 | -2.19177000 | H  | -1.84938500 | 2.49610800  | 2.37834300  |
| C | -1.38963400 | -0.94913700 | -2.84057400 | H  | 1.11657300  | -5.73792300 | -0.30214200 |
| H | -0.52239700 | -0.73217300 | -3.46989500 | H  | 1.86929700  | -4.14181500 | -0.15069400 |
| C | -0.48159500 | 1.07385600  | 0.42133600  | H  | -2.28401800 | -0.88130400 | -3.46646800 |
| H | -0.29250900 | 1.18448700  | -0.65011600 | H  | -1.45201400 | -0.15456600 | -2.09084000 |
| C | -2.32759100 | -0.29911100 | 1.51671200  | H  | 1.71874500  | 2.95784900  | -3.39717000 |
| C | -1.84153100 | -1.61230600 | 1.44113400  | H  | 0.90670600  | 1.71011600  | -2.44759600 |
| H | -1.13115300 | -1.87390800 | 0.66438800  | H  | 6.01663000  | -0.75592100 | 0.25661100  |
| C | -2.28169400 | -2.59004800 | 2.33321600  | H  | 4.35742600  | -1.37817700 | 0.26896000  |
| H | -1.88757000 | -3.59882800 | 2.24889600  | C  | -3.73837300 | -5.06666400 | -1.13228900 |
| C | -3.22795500 | -2.27933700 | 3.31345700  | H  | -4.17026800 | -4.77168500 | -0.16802300 |
| H | -3.57447800 | -3.04186000 | 4.00545100  | H  | -4.48922600 | -4.85946100 | -1.90098000 |
| C | -3.72857400 | -0.97826300 | 3.38752500  | H  | -3.57113600 | -6.14743400 | -1.10047900 |
| H | -4.46889800 | -0.72043800 | 4.14025900  | C  | 5.82681200  | 4.08852100  | -0.82639300 |
| C | -3.28191600 | 0.00299300  | 2.50051800  | H  | 5.70922100  | 4.84754500  | -1.60549300 |
| H | -3.68804500 | 1.00740500  | 2.55261500  | H  | 5.51713200  | 4.54350500  | 0.12265000  |
| C | -4.86310600 | 1.97215000  | -1.15730900 | H  | 6.89162100  | 3.85175500  | -0.73921300 |
| C | -6.14856200 | 2.63468500  | -0.66362000 | H  | 1.23699300  | -2.19554300 | -4.11450800 |
| H | -6.85991200 | 1.86564100  | -0.34839100 | H  | 3.12341800  | -0.72510300 | -4.01681900 |
| H | -6.61699100 | 3.22385500  | -1.45934900 | C  | 0.72238600  | 0.40101200  | 3.51099400  |
| H | -5.96004400 | 3.28837700  | 0.18972100  | H  | -0.15110500 | 0.99981600  | 3.28567800  |
| C | -5.19401700 | 0.91029400  | -2.21562300 | Br | 2.23475000  | -2.19783500 | 1.71860300  |
| H | -4.28541700 | 0.42873800  | -2.58714000 | C  | 0.51362900  | -0.86899600 | 4.03991100  |
| H | -5.73484200 | 1.33586200  | -3.06662600 | H  | -0.50476800 | -1.24520300 | 4.05229300  |
| H | -5.82168100 | 0.14065200  | -1.75769900 | C  | 1.53395700  | -1.73949700 | 4.37135900  |
| C | -3.72502200 | 2.96991100  | -1.60879000 | H  | 2.56128900  | -1.41528800 | 4.46840100  |
| C | -3.66124300 | 3.24564300  | -3.11020800 | H  | 1.31629700  | -2.74978100 | 4.69990200  |
| H | -2.82671200 | 3.92022200  | -3.32313500 | C  | 2.03794300  | 1.10756100  | 3.47545300  |
| H | -4.58131800 | 3.72624000  | -3.45958800 | H  | 2.04872400  | 1.86961200  | 2.69293900  |
| H | -3.50756100 | 2.32881300  | -3.68231700 | H  | 2.20001200  | 1.63298900  | 4.42990300  |
| C | -3.73881900 | 4.29423300  | -0.83225100 | H  | 2.87473300  | 0.42281100  | 3.31974700  |

L<sub>1</sub>-19<sub>5</sub>

|    |             |             |             |   |             |             |             |
|----|-------------|-------------|-------------|---|-------------|-------------|-------------|
| Cu | -0.80193200 | 0.87859700  | 0.88383000  | C | 3.32678200  | 2.16946200  | 1.81358400  |
| N  | 1.64574600  | -0.94844700 | 0.59605000  | H | 3.25220400  | 3.24121200  | 1.65289900  |
| N  | -0.67219400 | 2.18559700  | -1.97326100 | C | 4.30517400  | 1.64840700  | 2.66182400  |
| N  | -2.31361900 | 0.75343200  | -1.86515300 | H | 4.99812900  | 2.30981900  | 3.17379900  |
| O  | 3.56899000  | -2.32113700 | -0.19496000 | C | 4.38350900  | 0.26676600  | 2.84209500  |
| O  | 1.46531400  | -2.85935500 | -0.95766700 | H | 5.13972800  | -0.15648500 | 3.49751800  |
| B  | 2.22206400  | -2.01148600 | -0.16126500 | C | 3.49225800  | -0.58258900 | 2.18647000  |
| C  | -1.22278200 | 1.21389300  | -1.20854400 | H | 3.57381000  | -1.65599300 | 2.31470000  |
| C  | -1.42440200 | 2.46119600  | -3.22011300 | C | 3.76056700  | -3.34395500 | -1.20532300 |
| H  | -1.75063300 | 3.50471600  | -3.24301300 | C | 4.85004000  | -4.29899500 | -0.71982600 |
| C  | -2.59671600 | 1.47864900  | -3.12685800 | H | 5.80012100  | -3.76243000 | -0.64308200 |
| H  | -3.56457900 | 1.98427200  | -3.05965500 | H | 4.98528800  | -5.12813400 | -1.42244500 |
| C  | -3.11749700 | -0.40582700 | -1.57292500 | H | 4.61523100  | -4.70925900 | 0.26377900  |
| C  | -4.38733000 | -0.25498500 | -0.97274600 | C | 4.21805500  | -2.63630900 | -2.48795300 |
| C  | -5.15963900 | -1.40087400 | -0.76104400 | H | 3.44854200  | -1.95544900 | -2.86108000 |
| H  | -6.13040100 | -1.28886300 | -0.28345600 | H | 4.46267100  | -3.35077100 | -3.27994600 |
| C  | -4.73867800 | -2.67233900 | -1.16497000 | H | 5.11258500  | -2.04787500 | -2.26600500 |
| C  | -3.51165600 | -2.77705700 | -1.82073200 | C | 2.31871300  | -3.97684200 | -1.32097500 |
| H  | -3.17819000 | -3.74915300 | -2.17705600 | C | 1.93125800  | -4.45495100 | -2.71863600 |
| C  | -2.69035600 | -1.66415100 | -2.04435400 | H | 0.91273800  | -4.85374300 | -2.70203800 |
| C  | -1.39372800 | -1.86222100 | -2.79493600 | H | 2.59985800  | -5.25409300 | -3.05565500 |
| H  | -1.04945200 | -0.94575900 | -3.27728700 | H | 1.96421800  | -3.64264100 | -3.44694500 |
| C  | -4.95614100 | 1.09683200  | -0.62083800 | C | 2.05831200  | -5.08684700 | -0.29310900 |
| H  | -5.34829600 | 1.59619100  | -1.51726600 | H | 2.32045100  | -4.76155100 | 0.71729700  |
| C  | 0.62032900  | 2.79892600  | -1.82086500 | H | 2.62176500  | -5.99558200 | -0.52542400 |
| C  | 0.72907200  | 4.13920300  | -1.40387200 | H | 0.99229400  | -5.32915900 | -0.29718500 |
| C  | -0.47905500 | 4.98783100  | -1.09618300 | C | -0.35901200 | -1.99190100 | 1.64201500  |
| H  | -0.93135200 | 5.37113500  | -2.02095500 | C | -1.63942700 | -2.53594800 | 1.41715100  |
| C  | 2.00986100  | 4.70290200  | -1.32343400 | H | -2.22261600 | -2.18817400 | 0.57108100  |
| H  | 2.10084600  | 5.73180300  | -0.98302800 | C | -2.16541100 | -3.51648200 | 2.25452000  |
| C  | 3.16075400  | 3.99632400  | -1.67697100 | H | -3.15234800 | -3.92257700 | 2.04893600  |
| C  | 3.01050800  | 2.68811400  | -2.14900100 | C | -1.43093400 | -3.98018600 | 3.34989000  |
| H  | 3.89040200  | 2.12674800  | -2.45418000 | H | -1.84102800 | -4.74453500 | 4.00380600  |
| C  | 1.75896700  | 2.07545600  | -2.23588300 | C | -0.16153400 | -3.45320500 | 3.58802500  |
| C  | 1.64830300  | 0.67046000  | -2.77604200 | H | 0.42393500  | -3.80557500 | 4.43328100  |
| H  | 0.91949100  | 0.60338800  | -3.59150800 | C | 0.36953600  | -2.47499800 | 2.74500700  |
| C  | 0.17363600  | -0.95180900 | 0.70992400  | H | 1.36361300  | -2.08935400 | 2.94022100  |
| H  | -0.23677600 | -1.13385400 | -0.27969400 | H | -0.19475600 | 5.85640900  | -0.49611000 |
| C  | 2.50559700  | -0.06640400 | 1.33114000  | H | -1.23846000 | 4.42732500  | -0.54781500 |
| C  | 2.43788900  | 1.32054100  | 1.15162700  | H | 2.61352200  | 0.33862700  | -3.16683200 |
| H  | 1.69753700  | 1.73733500  | 0.47927400  | H | 1.33732700  | -0.03843200 | -2.00395800 |
|    |             |             |             | H | -1.52268500 | -2.62484400 | -3.56953900 |
|    |             |             |             | H | -0.58780000 | -2.20617300 | -2.13708600 |
|    |             |             |             | H | -5.79168500 | 0.99025800  | 0.07619000  |



|                                       |             |             |             |   |             |             |             |
|---------------------------------------|-------------|-------------|-------------|---|-------------|-------------|-------------|
| H                                     | -4.21148400 | 1.75292900  | -0.16597600 | H | 3.23068200  | -1.93658000 | -2.66718600 |
| C                                     | 4.53214400  | 4.61394100  | -1.54261100 | C | 1.11859600  | -1.70551900 | -2.37654600 |
| H                                     | 5.03902400  | 4.24358900  | -0.64301200 | C | 1.10127700  | -0.32678400 | -2.99379600 |
| H                                     | 5.16978400  | 4.36394700  | -2.39684500 | H | 0.15781000  | -0.10753500 | -3.50011300 |
| H                                     | 4.47684100  | 5.70350500  | -1.46625200 | C | -1.26322000 | -4.31375900 | -0.85619400 |
| C                                     | -5.59434500 | -3.88945700 | -0.90423800 | H | -2.05652800 | -4.31868500 | -1.61214600 |
| H                                     | -5.28783600 | -4.73536600 | -1.52594300 | C | -4.17623200 | 0.28761700  | -1.06013300 |
| H                                     | -5.52146200 | -4.20705400 | 0.14320500  | C | -5.09732200 | -0.34024300 | -0.19742800 |
| H                                     | -6.65131900 | -3.68538300 | -1.10401100 | C | -4.95765400 | -1.78748900 | 0.20029300  |
| H                                     | -0.78439800 | 2.28553900  | -4.09181300 | H | -4.87467600 | -2.44495600 | -0.67260900 |
| H                                     | -2.63708700 | 0.77451200  | -3.96441600 | C | -6.16386600 | 0.42225800  | 0.29215600  |
| C                                     | -0.51381000 | 0.76564800  | 2.98326900  | H | -6.87746600 | -0.05359900 | 0.96080900  |
| H                                     | 0.24916400  | -0.00495100 | 3.02085000  | C | -6.34085000 | 1.76659600  | -0.05085800 |
| Br                                    | -2.28738200 | 2.78688100  | 1.21135400  | C | -5.42570200 | 2.34764200  | -0.93393100 |
| C                                     | 0.03598400  | 2.03769600  | 3.47781500  | H | -5.55746700 | 3.38489200  | -1.23391600 |
| H                                     | 1.05652300  | 2.25447900  | 3.17577400  | C | -4.35074500 | 1.62409600  | -1.46141600 |
| C                                     | -0.57313300 | 2.89673900  | 4.31210800  | C | -3.43644700 | 2.26610400  | -2.47672000 |
| H                                     | -1.58911500 | 2.74973500  | 4.66223400  | H | -3.68212700 | 1.94089600  | -3.49616400 |
| H                                     | -0.05897100 | 3.78473500  | 4.66823900  | C | 1.13042200  | 0.24967400  | 0.81889900  |
| C                                     | -1.83154800 | 0.29612600  | 3.56886500  | H | 0.88567200  | -0.45945100 | 0.02557300  |
| H                                     | -2.18338300 | -0.62139800 | 3.09305400  | C | 1.10112400  | 2.72134400  | 0.08632600  |
| H                                     | -1.69361300 | 0.07219100  | 4.63709700  | C | 0.07212500  | 2.86282700  | -0.85269900 |
| H                                     | -2.60846000 | 1.05667900  | 3.47464700  | H | -0.26795200 | 1.98776600  | -1.39583200 |
| <b>L<sub>1</sub>-TS20<sub>5</sub></b> |             |             |             | C | -0.50656300 | 4.11296400  | -1.08610100 |
| Cu                                    | -1.15788300 | -0.23310700 | 0.71407100  | H | -1.29664200 | 4.20784600  | -1.82433800 |
| N                                     | 1.76669300  | 1.46406600  | 0.29072100  | C | -0.06434800 | 5.23816000  | -0.38995400 |
| N                                     | -3.11841000 | -0.48495400 | -1.65154200 | H | -0.51368000 | 6.20915500  | -0.57669500 |
| N                                     | -1.31158700 | -1.64299100 | -2.00076100 | C | 0.96535700  | 5.10534800  | 0.54363700  |
| O                                     | 3.86671700  | 2.51757300  | -0.48346900 | H | 1.32146000  | 5.97342600  | 1.09116500  |
| O                                     | 3.82576200  | 0.22124100  | -0.36061200 | C | 1.54375100  | 3.85889800  | 0.77799500  |
| B                                     | 3.12627500  | 1.39380300  | -0.16333300 | H | 2.35524300  | 3.75749900  | 1.49060100  |
| C                                     | -1.90155700 | -0.78706600 | -1.13194600 | C | 5.08014000  | 2.06310000  | -1.13505200 |
| C                                     | -3.42473400 | -1.19093100 | -2.91872500 | C | 6.21792400  | 3.00387200  | -0.74227900 |
| H                                     | -4.27229800 | -1.86967400 | -2.77542300 | H | 6.01399700  | 4.00649500  | -1.12925100 |
| C                                     | -2.11549500 | -1.92677700 | -3.21213900 | H | 7.16974800  | 2.66529200  | -1.16501600 |
| H                                     | -2.24785600 | -3.00427700 | -3.34230500 | H | 6.32371400  | 3.07655300  | 0.34143300  |
| C                                     | -0.04468100 | -2.31053400 | -1.86780200 | C | 4.83307400  | 2.14107100  | -2.64824900 |
| C                                     | -0.01607000 | -3.62048700 | -1.34378100 | H | 4.02146800  | 1.47378400  | -2.95185200 |
| C                                     | 1.21746100  | -4.27528600 | -1.27799200 | H | 5.72856900  | 1.88211800  | -3.22142400 |
| H                                     | 1.24980600  | -5.28060300 | -0.86452600 | H | 4.54264900  | 3.16331200  | -2.90559100 |
| C                                     | 2.40092600  | -3.68206600 | -1.72885900 | C | 5.21242100  | 0.58461800  | -0.59762400 |
| C                                     | 2.32687600  | -2.40580100 | -2.28922400 | C | 5.81635500  | -0.41119500 | -1.58542300 |
|                                       |             |             |             | H | 5.82429700  | -1.41012400 | -1.14018600 |
|                                       |             |             |             | H | 6.84963700  | -0.14051100 | -1.82721100 |

|    |             |             |             |                                     |             |             |             |
|----|-------------|-------------|-------------|-------------------------------------|-------------|-------------|-------------|
| H  | 5.24500800  | -0.45818100 | -2.51419900 | H                                   | 0.38857800  | 0.03389100  | 3.81389900  |
| C  | 5.94459000  | 0.49254500  | 0.74809400  | H                                   | -0.58364800 | 1.38750000  | 4.38757400  |
| H  | 5.53679200  | 1.20178400  | 1.47285000  |                                     |             |             |             |
| H  | 7.01605800  | 0.68524400  | 0.63635300  | <b>L<sub>1</sub>-17<sub>6</sub></b> |             |             |             |
| H  | 5.81129800  | -0.51203500 | 1.15737300  |                                     |             |             |             |
| C  | 1.89833800  | -0.41697200 | 1.89084100  | Cu                                  | -0.36986100 | 0.48341000  | -0.81761400 |
| C  | 1.82872600  | -1.81641100 | 2.03286700  | N                                   | 2.31769200  | -0.38994100 | 0.03917700  |
| H  | 1.19073900  | -2.38819300 | 1.36877200  | N                                   | -1.78222300 | 3.06082900  | -0.94024900 |
| C  | 2.55560500  | -2.46991100 | 3.02474700  | N                                   | -2.86172300 | 1.48644800  | -1.99491300 |
| H  | 2.48234500  | -3.54999300 | 3.11504900  | O                                   | 4.82201100  | -0.61279200 | -0.02006600 |
| C  | 3.36973800  | -1.74745100 | 3.90091800  | O                                   | 3.60696500  | -1.34714400 | -1.82622600 |
| H  | 3.93648300  | -2.26034600 | 4.67290100  | B                                   | 3.55451100  | -0.76207500 | -0.56805900 |
| C  | 3.44369500  | -0.35754700 | 3.77811000  | C                                   | -1.76731300 | 1.75189300  | -1.25232200 |
| H  | 4.06770900  | 0.21720500  | 4.45748300  | C                                   | -2.95732600 | 3.78277800  | -1.47857800 |
| C  | 2.71525900  | 0.29914100  | 2.78849500  | H                                   | -3.56663800 | 4.18310900  | -0.66159200 |
| H  | 2.77900700  | 1.37950600  | 2.70337500  | C                                   | -3.68360600 | 2.68518700  | -2.27867200 |
| H  | -5.82971300 | -2.11060300 | 0.77487000  | H                                   | -4.71637700 | 2.53342000  | -1.95106300 |
| H  | -4.06265700 | -1.95224300 | 0.81304900  | C                                   | -3.17555700 | 0.21739000  | -2.59117000 |
| H  | -3.53686600 | 3.35431400  | -2.45467200 | C                                   | -4.10365700 | -0.62872200 | -1.95820700 |
| H  | -2.39040800 | 2.00897100  | -2.29999200 | C                                   | -4.41871500 | -1.84324000 | -2.57659900 |
| H  | 1.90923300  | -0.22383100 | -3.72387200 | H                                   | -5.12953600 | -2.50733400 | -2.09049500 |
| H  | 1.24924000  | 0.44664600  | -2.23326800 | C                                   | -3.84155400 | -2.22942400 | -3.78987200 |
| H  | -1.04460400 | -5.35404000 | -0.60132400 | C                                   | -2.92044300 | -1.36435100 | -4.38956800 |
| H  | -1.65469300 | -3.81634100 | 0.03867500  | H                                   | -2.45533200 | -1.65023000 | -5.33020500 |
| C  | -7.48264900 | 2.57004800  | 0.52643800  | C                                   | -2.57637900 | -0.13729800 | -3.81422500 |
| H  | -7.20948300 | 3.00502900  | 1.49586300  | C                                   | -1.56270700 | 0.75940000  | -4.48432800 |
| H  | -7.76576000 | 3.39610100  | -0.13270800 | H                                   | -1.93468800 | 1.78236300  | -4.60780500 |
| H  | -8.36700600 | 1.94672100  | 0.69003900  | C                                   | -4.72540300 | -0.26795100 | -0.63065000 |
| C  | 3.72441900  | -4.39673600 | -1.59657000 | H                                   | -5.22136300 | 0.70868900  | -0.65717300 |
| H  | 4.18664500  | -4.17888500 | -0.62574500 | C                                   | -0.78575600 | 3.73851200  | -0.15681500 |
| H  | 3.60403700  | -5.48236400 | -1.66337600 | C                                   | -0.96984200 | 3.86502900  | 1.23173600  |
| H  | 4.42985200  | -4.08345200 | -2.37217900 | C                                   | -2.15958100 | 3.24997400  | 1.92817900  |
| H  | -3.69644300 | -0.47363400 | -3.69899400 | H                                   | -3.11156000 | 3.60012700  | 1.51280700  |
| H  | -1.60044600 | -1.54271300 | -4.10036800 | C                                   | 0.00365800  | 4.54710800  | 1.96511000  |
| C  | -0.55792800 | 1.22142400  | 2.27451300  | H                                   | -0.12088100 | 4.63754500  | 3.04123200  |
| H  | 0.22562400  | 1.95722200  | 2.15092700  | C                                   | 1.14130100  | 5.09058700  | 1.36001300  |
| Br | -1.77666700 | -2.24041400 | 2.12520300  | C                                   | 1.28511500  | 4.95576700  | -0.02331200 |
| C  | -1.82910800 | 1.70425100  | 1.72228500  | H                                   | 2.16303500  | 5.37301000  | -0.51092600 |
| H  | -1.75522400 | 2.49371900  | 0.97900300  | C                                   | 0.33726400  | 4.28429600  | -0.80182700 |
| C  | -3.06337400 | 1.26990500  | 2.07594500  | C                                   | 0.54463200  | 4.12663000  | -2.28946500 |
| H  | -3.21151100 | 0.47258800  | 2.79526800  | H                                   | -0.31898600 | 4.47364300  | -2.86796600 |
| H  | -3.94786900 | 1.71207500  | 1.63235400  | C                                   | 1.08211200  | -0.84666900 | -0.65940900 |
| C  | -0.53830400 | 0.58128600  | 3.63988000  | H                                   | 1.35897800  | -0.93051800 | -1.71588800 |
| H  | -1.36459200 | -0.10741300 | 3.80143000  | C                                   | 2.21339700  | 0.30256900  | 1.26796300  |



|   |             |             |             |    |             |             |             |
|---|-------------|-------------|-------------|----|-------------|-------------|-------------|
| C | -5.06799900 | -1.86083300 | -2.11613900 | H  | 3.21453700  | -3.43354200 | -3.60232400 |
| C | -3.81400300 | -2.03969200 | -2.71208600 | H  | 4.97925200  | -3.37311600 | -3.47221300 |
| H | -3.57003500 | -2.99900100 | -3.16320000 | H  | 4.04210200  | -1.87160000 | -3.62029500 |
| C | -2.86319800 | -1.01590500 | -2.75336200 | C  | 3.72672700  | -4.23444700 | -1.09787400 |
| C | -1.53091300 | -1.24015800 | -3.42926900 | H  | 3.61316200  | -4.21755100 | -0.01060700 |
| H | -1.38647900 | -0.55668000 | -4.27424900 | H  | 4.56630000  | -4.88842000 | -1.35327200 |
| C | -4.79635600 | 1.76842800  | -0.94125700 | H  | 2.81350800  | -4.66229600 | -1.52022200 |
| H | -4.71863100 | 2.59182800  | -1.66031800 | C  | 0.10697400  | -2.51085400 | 0.77141500  |
| C | 0.71131500  | 3.06437100  | -1.23193100 | C  | -0.94265700 | -3.22218800 | 0.14295400  |
| C | 0.63948300  | 4.11548900  | -0.29856600 | H  | -1.40410900 | -2.80177600 | -0.74810300 |
| C | -0.68380200 | 4.67250900  | 0.16548100  | C  | -1.38206000 | -4.45535900 | 0.62044900  |
| H | -1.28472800 | 5.05424000  | -0.66857000 | H  | -2.18790700 | -4.97233800 | 0.10459200  |
| C | 1.83696800  | 4.63231700  | 0.20367100  | C  | -0.78867800 | -5.03322400 | 1.74600100  |
| H | 1.79226100  | 5.43692900  | 0.93386400  | H  | -1.12886700 | -5.99491500 | 2.11901900  |
| C | 3.08315200  | 4.14554200  | -0.20208600 | C  | 0.26142700  | -4.35682100 | 2.37279500  |
| C | 3.11657000  | 3.12263800  | -1.15300800 | H  | 0.74895200  | -4.79782600 | 3.23925200  |
| H | 4.07733500  | 2.74275900  | -1.49327000 | C  | 0.70385800  | -3.12183900 | 1.89712900  |
| C | 1.94710700  | 2.56538300  | -1.68006600 | H  | 1.52849700  | -2.62306900 | 2.39526900  |
| C | 2.03454800  | 1.44345800  | -2.68794100 | H  | -0.52693900 | 5.49969600  | 0.86255200  |
| H | 1.29090600  | 1.53884900  | -3.48476100 | H  | -1.27841900 | 3.90690700  | 0.67455300  |
| C | 0.53709900  | -1.19352400 | 0.23080700  | H  | 3.02341500  | 1.42707100  | -3.15525400 |
| H | 0.53274200  | -1.26747900 | -0.85869000 | H  | 1.87672100  | 0.46867300  | -2.21405700 |
| C | 2.14673300  | 0.01578300  | 1.75968500  | H  | -1.46052800 | -2.26027000 | -3.81491900 |
| C | 1.18776300  | 0.12945900  | 2.78121700  | H  | -0.69580000 | -1.08062100 | -2.74138300 |
| H | 0.25721300  | -0.41611200 | 2.70507600  | H  | -5.82454900 | 1.75418300  | -0.56968700 |
| C | 1.41775900  | 0.93604700  | 3.89713700  | H  | -4.13038400 | 2.00248200  | -0.10392200 |
| H | 0.64778200  | 1.00579500  | 4.66055200  | C  | 4.35687500  | 4.69137500  | 0.39654300  |
| C | 2.61248100  | 1.63910600  | 4.03675400  | H  | 5.20696100  | 4.56638700  | -0.28093500 |
| H | 2.79249100  | 2.26020700  | 4.90944400  | H  | 4.26528200  | 5.75510300  | 0.63715200  |
| C | 3.57384500  | 1.52896100  | 3.02874900  | H  | 4.59733100  | 4.16501100  | 1.32831900  |
| H | 4.51514100  | 2.06721200  | 3.11361300  | C  | -6.08297200 | -2.97982600 | -2.10871700 |
| C | 3.34602700  | 0.74230600  | 1.90267700  | H  | -5.62979400 | -3.92766800 | -1.80000400 |
| H | 4.10273100  | 0.67973800  | 1.13250700  | H  | -6.91173800 | -2.76441500 | -1.42873100 |
| C | 5.03749300  | -1.99777300 | -0.91109000 | H  | -6.50739600 | -3.13655900 | -3.10797600 |
| C | 6.18889400  | -2.83196400 | -0.35123700 | H  | -0.32432000 | 3.21616000  | -3.81300500 |
| H | 6.89395200  | -2.17950500 | 0.17218000  | H  | -2.12074400 | 1.71396400  | -4.29520500 |
| H | 6.73124300  | -3.34138600 | -1.15497400 | Br | -2.25992500 | 1.68692100  | 1.96676100  |
| H | 5.83301400  | -3.57968100 | 0.35944700  | C  | -3.14208100 | -1.39617800 | 4.07120500  |
| C | 5.59035700  | -0.83139600 | -1.74286200 | H  | -2.77689800 | -1.98023600 | 4.91505900  |
| H | 4.78039400  | -0.22083900 | -2.15146700 | C  | -2.46145000 | -1.51451600 | 2.89704000  |
| H | 6.21346100  | -1.18185400 | -2.57144800 | H  | -1.57569600 | -2.14090400 | 2.87497500  |
| H | 6.20353100  | -0.19569800 | -1.09764700 | C  | -2.84216400 | -0.90067000 | 1.67327200  |
| C | 3.91507700  | -2.81751100 | -1.65844500 | H  | -3.81596300 | -0.44820000 | 1.56142100  |
| C | 4.05145300  | -2.87010400 | -3.17932300 | H  | -2.38036500 | -1.25220600 | 0.75827900  |

|                                     |             |             |             |   |             |             |             |
|-------------------------------------|-------------|-------------|-------------|---|-------------|-------------|-------------|
| C                                   | -4.34243600 | -0.54793400 | 4.33546900  | H | 0.01622200  | -1.25208600 | -0.74265400 |
| H                                   | -4.22957300 | -0.02875000 | 5.29431300  | C | 1.71635400  | -0.00601500 | 1.84424200  |
| H                                   | -4.50368400 | 0.20448200  | 3.56149300  | C | 0.85591800  | 0.01040800  | 2.95171200  |
| H                                   | -5.24609400 | -1.16799000 | 4.42548500  | H | -0.03979200 | -0.59477800 | 2.95932400  |
| <b>L<sub>1</sub>-19<sub>6</sub></b> |             |             |             |   |             |             |             |
| Cu                                  | -1.17665900 | 0.35018600  | 0.60516300  | C | 1.13644100  | 0.81296600  | 4.05924800  |
| N                                   | 1.45547100  | -0.80887900 | 0.69552100  | H | 0.44365700  | 0.81060300  | 4.89583800  |
| N                                   | -0.17538000 | 2.47787100  | -1.66021200 | C | 2.28243700  | 1.60373000  | 4.09521500  |
| N                                   | -2.00772600 | 1.37530800  | -2.07277700 | H | 2.49943800  | 2.22461100  | 4.95941700  |
| O                                   | 3.81767000  | -1.57973800 | 0.41173800  | C | 3.14154300  | 1.59313200  | 2.99371500  |
| O                                   | 2.28809400  | -2.12111400 | -1.21806400 | H | 4.03410200  | 2.21350800  | 2.99365700  |
| B                                   | 2.51235600  | -1.46385300 | -0.01866700 | C | 2.86084200  | 0.81041000  | 1.87757600  |
| C                                   | -0.93879000 | 1.44770800  | -1.24268300 | H | 3.52396000  | 0.83555200  | 1.02246600  |
| C                                   | -0.75869800 | 3.22075600  | -2.80646000 | C | 4.57398200  | -2.25707600 | -0.62365500 |
| H                                   | -0.99430300 | 4.24624400  | -2.50623300 | C | 5.56413300  | -3.20377000 | 0.05426800  |
| C                                   | -2.01243700 | 2.40225900  | -3.13944500 | H | 6.27946100  | -2.62283200 | 0.64338500  |
| H                                   | -2.92844000 | 2.99757800  | -3.09682500 | H | 6.12564600  | -3.78103300 | -0.68800200 |
| C                                   | -2.99663900 | 0.33177900  | -2.09074800 | H | 5.05987200  | -3.89743000 | 0.72894500  |
| C                                   | -4.28753000 | 0.57506100  | -1.58105100 | C | 5.33720700  | -1.17945400 | -1.40542000 |
| C                                   | -5.22598600 | -0.46280200 | -1.63612800 | H | 4.65130900  | -0.47884600 | -1.88820400 |
| H                                   | -6.21988800 | -0.28473900 | -1.23221400 | H | 5.98519500  | -1.61618600 | -2.17139500 |
| C                                   | -4.92975700 | -1.70785600 | -2.19625800 | H | 5.96154800  | -0.61382700 | -0.70827000 |
| C                                   | -3.65775500 | -1.89565200 | -2.74679100 | C | 3.44093900  | -2.96699300 | -1.46991100 |
| H                                   | -3.41996100 | -2.84181900 | -3.22790400 | C | 3.68872800  | -3.01221000 | -2.97686000 |
| C                                   | -2.68332700 | -0.89258600 | -2.71736000 | H | 2.83493300  | -3.48220000 | -3.47360400 |
| C                                   | -1.34964200 | -1.12594700 | -3.38923300 | H | 4.58070600  | -3.60404200 | -3.20765000 |
| H                                   | -1.12206800 | -0.33995400 | -4.11776500 | H | 3.81577000  | -2.01314400 | -3.39750700 |
| C                                   | -4.68502100 | 1.91658600  | -1.01528500 | C | 3.08345900  | -4.36840200 | -0.95567900 |
| H                                   | -4.78075800 | 2.66879700  | -1.80880200 | H | 2.87011300  | -4.35693500 | 0.11629200  |
| C                                   | 1.16060100  | 2.82685300  | -1.25230100 | H | 3.88621100  | -5.08676400 | -1.14760200 |
| C                                   | 1.37992100  | 3.93518700  | -0.41182700 | H | 2.18107600  | -4.71275100 | -1.46781300 |
| C                                   | 0.24602600  | 4.76724000  | 0.13094400  | C | -0.22251500 | -2.64767600 | 0.81519500  |
| H                                   | -0.18093800 | 5.40949000  | -0.65109100 | C | -1.17450600 | -3.41938300 | 0.11808000  |
| C                                   | 2.70183700  | 4.28865100  | -0.11866900 | H | -1.67145800 | -2.99189300 | -0.74924100 |
| H                                   | 2.87648300  | 5.13466400  | 0.54187900  | C | -1.47699800 | -4.72291000 | 0.50731100  |
| C                                   | 3.79439500  | 3.60542400  | -0.65713900 | H | -2.21400400 | -5.29301400 | -0.05230200 |
| C                                   | 3.54086100  | 2.54474900  | -1.53140800 | C | -0.82970300 | -5.30067200 | 1.60194500  |
| H                                   | 4.37686300  | 2.02626600  | -1.99523800 | H | -1.06183000 | -6.31772700 | 1.90435900  |
| C                                   | 2.23888400  | 2.14176100  | -1.84600600 | C | 0.12898100  | -4.55775400 | 2.29482700  |
| C                                   | 2.02023100  | 1.01524000  | -2.82855100 | H | 0.64971500  | -4.99745900 | 3.14146600  |
| H                                   | 1.21824900  | 1.23944900  | -3.53843000 | C | 0.42947900  | -3.25098800 | 1.90894500  |
| C                                   | 0.10315700  | -1.27148600 | 0.34178900  | H | 1.18270800  | -2.69227400 | 2.45418900  |
|                                     |             |             |             | H | 0.60269900  | 5.42569500  | 0.92734500  |
|                                     |             |             |             | H | -0.55771600 | 4.14664600  | 0.53368900  |
|                                     |             |             |             | H | 2.93139300  | 0.83270300  | -3.40567900 |

|                                       |             |             |             |   |             |             |             |
|---------------------------------------|-------------|-------------|-------------|---|-------------|-------------|-------------|
| H                                     | 1.75693100  | 0.07957500  | -2.32647700 | C | 5.01678200  | 2.02813700  | 1.77682600  |
| H                                     | -1.35341000 | -2.07996700 | -3.92260400 | H | 5.23281200  | 2.34692600  | 2.79392100  |
| H                                     | -0.51827500 | -1.14820000 | -2.67937800 | C | 5.31026900  | 2.88751200  | 0.71346900  |
| H                                     | -5.65686100 | 1.84843500  | -0.51931300 | C | 5.02623400  | 2.45543800  | -0.58593400 |
| H                                     | -3.95464200 | 2.28525000  | -0.28942500 | H | 5.24856400  | 3.10926800  | -1.42609200 |
| C                                     | 5.20849200  | 3.99911500  | -0.30114900 | C | 4.46052000  | 1.20207000  | -0.83855600 |
| H                                     | 5.91190000  | 3.73250300  | -1.09585800 | C | 4.15094800  | 0.77550000  | -2.25424600 |
| H                                     | 5.29147000  | 5.07507900  | -0.11980400 | H | 4.66505100  | -0.15363900 | -2.52641800 |
| H                                     | 5.54057800  | 3.49029500  | 0.61245700  | C | 4.10565200  | -0.11243500 | 2.75599400  |
| C                                     | -5.95141300 | -2.82008800 | -2.20424000 | H | 4.45706200  | -1.14089800 | 2.62093800  |
| H                                     | -5.87759800 | -3.42755700 | -1.29366000 | C | 1.09917100  | -3.37777900 | -0.61269100 |
| H                                     | -6.97140000 | -2.42697400 | -2.24969700 | C | 0.38316400  | -3.87475700 | 0.49302300  |
| H                                     | -5.80674900 | -3.49152500 | -3.05603700 | C | 0.80381300  | -3.57385200 | 1.90954400  |
| H                                     | -0.04189300 | 3.26417300  | -3.63232300 | H | 1.87191600  | -3.76325700 | 2.06325800  |
| H                                     | -1.96420100 | 1.92472800  | -4.12498200 | C | -0.73630700 | -4.67740300 | 0.24336700  |
| Br                                    | -2.10055200 | 2.37093200  | 1.64642600  | H | -1.29303400 | -5.07017200 | 1.09112800  |
| C                                     | -2.92110200 | -0.86016800 | 4.06832700  | C | -1.14939200 | -4.99993500 | -1.05230800 |
| H                                     | -2.68053300 | -1.41120900 | 4.97818600  | C | -0.39253900 | -4.52054300 | -2.12584200 |
| C                                     | -2.37305800 | -1.32085700 | 2.91883900  | H | -0.68168900 | -4.78188200 | -3.14146300 |
| H                                     | -1.73720200 | -2.19889600 | 2.99926600  | C | 0.73821600  | -3.72093500 | -1.93030300 |
| C                                     | -2.58260500 | -0.80860600 | 1.57497000  | C | 1.56327300  | -3.27547700 | -3.11564700 |
| H                                     | -3.38384300 | -0.08231900 | 1.47785000  | H | 1.85210800  | -2.22422600 | -3.04114200 |
| H                                     | -2.61643100 | -1.58309100 | 0.81166500  | C | -1.23377700 | 0.60345200  | -1.13533500 |
| C                                     | -3.85891300 | 0.29368700  | 4.24743700  | H | -1.02070300 | -0.39989100 | -0.77217900 |
| H                                     | -3.53221700 | 0.92179500  | 5.08489700  | C | -3.14931200 | 2.21534100  | -0.98328800 |
| H                                     | -3.91771900 | 0.93005100  | 3.36378700  | C | -3.93468400 | 1.99751500  | -2.12268500 |
| H                                     | -4.86681500 | -0.06438300 | 4.50326400  | H | -3.86676700 | 1.04878100  | -2.64437400 |
| <b>L<sub>1</sub>-TS20<sub>6</sub></b> |             |             |             | C | -4.79367600 | 2.99544000  | -2.58273100 |
| Cu                                    | 0.89124300  | 0.05110300  | 0.28137500  | H | -5.39283800 | 2.81908500  | -3.47146200 |
| N                                     | -2.32133100 | 1.14730700  | -0.46930400 | C | -4.89316800 | 4.20755200  | -1.89705700 |
| N                                     | 2.28016500  | -2.59066800 | -0.40258700 | H | -5.56480200 | 4.98306200  | -2.25383600 |
| N                                     | 3.63938300  | -0.94489400 | 0.01474900  | C | -4.13315200 | 4.41240300  | -0.74422800 |
| O                                     | -3.88662900 | 0.96060000  | 1.43599300  | H | -4.21521900 | 5.34649400  | -0.19599700 |
| O                                     | -2.63224800 | -0.89589900 | 0.91109100  | C | -3.26582700 | 3.42075300  | -0.28389400 |
| B                                     | -2.90572200 | 0.41735200  | 0.65491100  | H | -2.67427700 | 3.56584200  | 0.61175800  |
| C                                     | 2.33314900  | -1.26402900 | -0.13509700 | C | -4.18186600 | -0.00291200 | 2.48980900  |
| C                                     | 3.60097300  | -3.26091400 | -0.36237500 | C | -5.69285700 | 0.00624500  | 2.72197700  |
| H                                     | 3.63758900  | -3.96720500 | 0.47488900  | H | -5.99467900 | 0.98804100  | 3.09754100  |
| C                                     | 4.56572000  | -2.08071800 | -0.18414100 | H | -5.97627100 | -0.74220800 | 3.46938300  |
| H                                     | 5.22559800  | -2.19510300 | 0.68101900  | H | -6.24963800 | -0.18781700 | 1.80337400  |
| C                                     | 4.16905600  | 0.36754900  | 0.25646700  | C | -3.45395800 | 0.48139700  | 3.74916100  |
| C                                     | 4.44559500  | 0.76615100  | 1.57751000  | H | -2.37216200 | 0.51237500  | 3.59855800  |
|                                       |             |             |             | H | -3.67510200 | -0.16032400 | 4.60775900  |
|                                       |             |             |             | H | -3.79849000 | 1.49327600  | 3.98257600  |

C -3.60588800 -1.35748300 1.89463600  
 C -2.88537200 -2.24254600 2.90875800  
 H -2.54187500 -3.15572400 2.41400600  
 H -3.56113300 -2.53045800 3.72141100  
 H -2.01287000 -1.73277800 3.31940000  
 C -4.64253900 -2.17438700 1.11198600  
 H -5.15600600 -1.56205700 0.36504800  
 H -5.39309000 -2.61608600 1.77460200  
 H -4.12716000 -2.98425900 0.58795900  
 C -0.95417400 0.77622300 -2.57180900  
 C -0.56849700 -0.37391200 -3.29021000  
 H -0.51395100 -1.32459200 -2.76878800  
 C -0.28145000 -0.31443400 -4.65182800  
 H -0.00016100 -1.22036200 -5.18122900  
 C -0.36135200 0.90081300 -5.33574500  
 H -0.13749200 0.95021100 -6.39739800  
 C -0.73150200 2.05224700 -4.63809000  
 H -0.79264400 3.00556800 -5.15546900  
 C -1.02474700 1.99625400 -3.27689900  
 H -1.30740500 2.90632100 -2.76400300  
 H 0.25015600 -4.20127300 2.61317900  
 H 0.62112700 -2.52484400 2.17155700  
 H 2.48642000 -3.86244800 -3.20457900  
 H 1.00755000 -3.41446900 -4.04691500  
 H 4.46114900 1.54549000 -2.96510800  
 H 3.07871400 0.60115100 -2.39090300  
 H 4.55890400 0.27970000 3.67030400  
 H 3.01906500 -0.15369800 2.90287200  
 C -2.38649400 -5.83427900 -1.28753800  
 H -2.56139000 -6.53261900 -0.46353600  
 H -3.27841300 -5.20069200 -1.37173300  
 H -2.31127100 -6.41261800 -2.21343900  
 C 5.89212100 4.25849400 0.96549400  
 H 6.56639500 4.25502100 1.82749600  
 H 6.44990800 4.62339800 0.09795900  
 H 5.10002100 4.98766300 1.17576000  
 H 3.78039600 -3.82203300 -1.28384500  
 H 5.19395800 -1.90910400 -1.06603800  
 Br 0.22917800 0.13332100 2.63978100  
 C 0.22925700 3.90419300 1.04841300  
 H -0.43594500 4.75422200 1.20409500  
 C 0.08857600 3.22576600 -0.11530000  
 H -0.66750300 3.61130100 -0.79560500  
 C 0.82163000 2.06210700 -0.57458800

H 1.76217500 1.90850100 -0.02768600  
 H 0.98193200 2.01168300 -1.64685000  
 C 1.20261900 3.63532100 2.15569200  
 H 1.55796300 4.57673300 2.59259400  
 H 0.73578000 3.04749200 2.95567000  
 H 2.07123300 3.06343300 1.82005600

**(E)-3b**

C 0.43510200 -0.71567100 0.39285400  
 Br -3.27899400 0.16418000 -0.37361300  
 C -0.61036200 0.04525300 0.75901800  
 H -0.50212000 1.11775900 0.89991900  
 C -1.96244900 -0.50571300 0.99927900  
 H -2.00439100 -1.59085900 0.91985900  
 H -2.40500800 -0.17394200 1.93798800  
 C 1.81803100 -0.28462700 0.15709000  
 C 2.77263500 -1.24995500 -0.20897800  
 C 2.24224500 1.05234700 0.27873200  
 C 4.10011700 -0.89886700 -0.44640200  
 H 2.46354400 -2.28739500 -0.30824500  
 C 3.56701800 1.40340900 0.04175500  
 H 1.53179000 1.82375300 0.55856300  
 C 4.50321400 0.43052600 -0.32169500  
 H 4.81820000 -1.66312600 -0.72874500  
 H 3.87298100 2.44092800 0.13986000  
 H 5.53648300 0.70905800 -0.50576400  
 H 0.26000000 -1.78269300 0.25311200

**L<sub>1</sub>-17<sub>7</sub>**

Cu 0.47594000 -0.64026700 -0.76298800  
 N 2.38090300 1.55835400 -0.16036900  
 N -1.67003900 -1.67345800 -2.57117100  
 N -0.20890800 -3.17279700 -1.96276900  
 O 4.45846900 2.96061900 -0.01473600  
 O 4.47268300 0.86763600 0.93596000  
 B 3.73132000 1.80376200 0.23015000  
 C -0.56247100 -1.87689700 -1.83539400  
 C -2.15722900 -2.89696600 -3.25065200  
 H -3.15464900 -3.16100000 -2.88475000  
 C -1.08924800 -3.93914300 -2.87243800  
 H -1.50773100 -4.81109700 -2.36096500  
 C 0.94031900 -3.78122500 -1.35140300

|   |             |             |             |    |             |             |             |
|---|-------------|-------------|-------------|----|-------------|-------------|-------------|
| C | 0.78585400  | -4.46752900 | -0.13285400 | H  | 6.50110200  | 3.09061000  | -1.63078600 |
| C | 1.91120100  | -5.08129600 | 0.42584800  | C  | 5.66602100  | 1.52872000  | 1.41536800  |
| H | 1.80267200  | -5.61269300 | 1.36855000  | C  | 6.80862700  | 0.51411500  | 1.43066600  |
| C | 3.16652900  | -5.02643700 | -0.18861900 | H  | 6.58572500  | -0.27585500 | 2.15392400  |
| C | 3.28126100  | -4.33974300 | -1.40096100 | H  | 7.75049300  | 0.98807700  | 1.72719000  |
| H | 4.24910700  | -4.28845600 | -1.89428600 | H  | 6.94456300  | 0.04644900  | 0.45375600  |
| C | 2.18586300  | -3.71049200 | -2.00061500 | C  | 5.37199500  | 2.01169500  | 2.84308600  |
| C | 2.35600600  | -2.95181300 | -3.29506500 | H  | 4.55232900  | 2.73529000  | 2.85398000  |
| H | 2.20167300  | -1.87756500 | -3.14305500 | H  | 6.25065800  | 2.47043300  | 3.30738500  |
| C | -0.54642100 | -4.52585900 | 0.57506000  | H  | 5.06725700  | 1.15423900  | 3.44905200  |
| H | -1.32226300 | -4.99379300 | -0.04189400 | C  | 1.23976100  | 0.49010100  | 1.80236800  |
| C | -2.40108200 | -0.44220300 | -2.69664500 | C  | 1.06328900  | -0.65347800 | 2.61213900  |
| C | -3.46583300 | -0.18135500 | -1.81342900 | H  | 1.31020500  | -1.62979700 | 2.19910300  |
| C | -3.80193600 | -1.12328900 | -0.68286100 | C  | 0.60776400  | -0.55899100 | 3.92405200  |
| H | -4.18134000 | -2.08567600 | -1.04835200 | H  | 0.50772600  | -1.46207100 | 4.52256900  |
| C | -4.20521600 | 0.98960000  | -2.00106800 | C  | 0.30193700  | 0.68907700  | 4.48337000  |
| H | -5.01624200 | 1.21217400  | -1.31192500 | H  | -0.04563400 | 0.76582100  | 5.50982100  |
| C | -3.92314400 | 1.88412900  | -3.03992500 | C  | 0.47342400  | 1.83231400  | 3.70204100  |
| C | -2.85361300 | 1.59585600  | -3.89153800 | H  | 0.25823700  | 2.81277200  | 4.12094000  |
| H | -2.60610300 | 2.29038800  | -4.69048500 | C  | 0.93754800  | 1.73644700  | 2.38591200  |
| C | -2.07528300 | 0.44374600  | -3.73693000 | H  | 1.09044600  | 2.64208800  | 1.80729700  |
| C | -0.89433000 | 0.19274200  | -4.64318300 | H  | -4.57003000 | -0.69362400 | -0.03702000 |
| H | -0.91459600 | -0.80912900 | -5.08598500 | H  | -2.93143000 | -1.33941200 | -0.05775200 |
| C | 1.74833100  | 0.33145000  | 0.39884900  | H  | -0.87134400 | 0.91989600  | -5.45843300 |
| H | 2.54548800  | -0.41919300 | 0.44300400  | H  | 0.04619800  | 0.28304800  | -4.08861200 |
| C | 1.63136300  | 2.44097800  | -0.97064100 | H  | 1.64194100  | -3.27391600 | -4.06106800 |
| C | 0.22678400  | 2.49551400  | -0.87851700 | H  | 3.36274500  | -3.09320800 | -3.69605300 |
| H | -0.28435200 | 1.86178700  | -0.16359000 | H  | -0.46806700 | -5.10448300 | 1.49851100  |
| C | -0.51506000 | 3.36456100  | -1.68068600 | H  | -0.90806400 | -3.52705100 | 0.83896900  |
| H | -1.59617500 | 3.37669200  | -1.57867600 | C  | -4.76320600 | 3.12502700  | -3.23209200 |
| C | 0.11652500  | 4.20557200  | -2.59628300 | H  | -4.95746600 | 3.62133900  | -2.27593400 |
| H | -0.46117900 | 4.88510000  | -3.21661000 | H  | -4.27192900 | 3.84206900  | -3.89575900 |
| C | 1.50902800  | 4.15649000  | -2.69912100 | H  | -5.73692500 | 2.87958600  | -3.67419200 |
| H | 2.02465700  | 4.79588400  | -3.41169900 | C  | 4.37234400  | -5.66826200 | 0.45601600  |
| C | 2.25728900  | 3.28819300  | -1.90809800 | H  | 4.09624800  | -6.56499400 | 1.01900600  |
| H | 3.33473900  | 3.26868600  | -2.00449200 | H  | 5.12202900  | -5.95077400 | -0.28900900 |
| C | 5.82883900  | 2.70929800  | 0.38153000  | H  | 4.85464200  | -4.97808700 | 1.15915000  |
| C | 6.40949600  | 4.00216700  | 0.95224900  | H  | -2.22761400 | -2.72990100 | -4.32999000 |
| H | 6.44742400  | 4.76466400  | 0.16864000  | H  | -0.52073800 | -4.29702800 | -3.73803900 |
| H | 7.42861300  | 3.84491700  | 1.32161800  | C  | -3.31089500 | 1.02852300  | 2.69082000  |
| H | 5.79719300  | 4.38962200  | 1.76823600  | Br | -3.53803500 | -2.86270500 | 2.90830100  |
| C | 6.59829400  | 2.29869200  | -0.88256100 | C  | -3.96222100 | -0.00108700 | 3.26207200  |
| H | 6.19245400  | 1.37696400  | -1.30940400 | H  | -5.04901700 | -0.04465500 | 3.27912700  |
| H | 7.66287400  | 2.14716300  | -0.67907000 | C  | -3.25087900 | -1.12204000 | 3.91335800  |



|   |             |             |            |
|---|-------------|-------------|------------|
| H | -2.17053700 | -0.99062300 | 3.93277000 |
| H | -3.63319300 | -1.36570100 | 4.90418100 |
| H | -2.22163400 | 1.01112400  | 2.70562600 |
| C | -3.90057300 | 2.20778800  | 2.04409300 |
| C | -3.03531200 | 3.17395200  | 1.49846000 |
| C | -5.28861700 | 2.42347000  | 1.93649700 |
| C | -3.53392000 | 4.31180700  | 0.86505400 |
| H | -1.96173500 | 3.02469300  | 1.57382000 |
| C | -5.78652700 | 3.55939600  | 1.30461900 |
| H | -5.98418100 | 1.70122200  | 2.35323800 |
| C | -4.91222800 | 4.51013300  | 0.76577400 |
| H | -2.84333300 | 5.04070000  | 0.45116800 |
| H | -6.86054900 | 3.70902600  | 1.23602900 |
| H | -5.30462900 | 5.39942500  | 0.28066200 |

**L<sub>1</sub>-TS18<sub>7</sub>**

|    |             |             |             |
|----|-------------|-------------|-------------|
| Cu | -0.91995300 | -0.06130900 | 0.42471500  |
| N  | 2.01283200  | 0.95923900  | -0.13652600 |
| N  | -3.43095800 | -1.21580600 | -0.99998600 |
| N  | -1.68792000 | -2.40979300 | -1.52416200 |
| O  | 4.32125400  | 1.91582200  | 0.11596000  |
| O  | 4.10660900  | -0.36396500 | 0.13073400  |
| B  | 3.45388700  | 0.84576300  | 0.05718900  |
| C  | -2.08527700 | -1.29983900 | -0.85427600 |
| C  | -4.01002000 | -2.28414400 | -1.84867500 |
| H  | -4.82528900 | -2.79328500 | -1.33011100 |
| C  | -2.80608300 | -3.19493400 | -2.09608900 |
| H  | -2.89183500 | -4.15465000 | -1.57649200 |
| C  | -0.34424300 | -2.84475600 | -1.80052200 |
| C  | 0.25645300  | -3.84520600 | -1.00785200 |
| C  | 1.56959100  | -4.22308200 | -1.30813000 |
| H  | 2.04676100  | -4.97566900 | -0.68475700 |
| C  | 2.28117600  | -3.67076500 | -2.37734000 |
| C  | 1.62052300  | -2.75911600 | -3.20304000 |
| H  | 2.13418000  | -2.35638100 | -4.07307900 |
| C  | 0.30589400  | -2.35166400 | -2.95026200 |
| C  | -0.39675700 | -1.47649500 | -3.96265800 |
| H  | -1.17979600 | -0.86318200 | -3.51544500 |
| C  | -0.48933000 | -4.54741800 | 0.09902800  |
| H  | -1.23317600 | -5.24076800 | -0.31516000 |
| C  | -4.28841700 | -0.13135000 | -0.61101600 |
| C  | -5.21772500 | -0.31686900 | 0.43142700  |
| C  | -5.32488300 | -1.61793100 | 1.18788400  |

|   |             |             |             |
|---|-------------|-------------|-------------|
| H | -5.82098800 | -2.39015200 | 0.58561400  |
| C | -6.06538100 | 0.74956200  | 0.75725800  |
| H | -6.77514900 | 0.61623000  | 1.57047300  |
| C | -6.03094900 | 1.96810500  | 0.07458600  |
| C | -5.13106500 | 2.09960600  | -0.98833300 |
| H | -5.11101000 | 3.02593000  | -1.55811300 |
| C | -4.26357700 | 1.06551800  | -1.35534600 |
| C | -3.33501200 | 1.24827400  | -2.53157900 |
| H | -3.37479700 | 0.39407800  | -3.21614300 |
| C | 1.20962400  | -0.13379400 | 0.38286600  |
| H | 1.11241400  | -0.97263900 | -0.31792800 |
| C | 1.58423300  | 1.73335800  | -1.25281400 |
| C | 0.62129200  | 1.25040800  | -2.15274600 |
| H | 0.17832800  | 0.27857400  | -1.98660700 |
| C | 0.25181700  | 2.00014000  | -3.27295000 |
| H | -0.48757100 | 1.59759300  | -3.95966200 |
| C | 0.83026400  | 3.24167500  | -3.52610600 |
| H | 0.54349800  | 3.81831000  | -4.40067900 |
| C | 1.78363900  | 3.73065900  | -2.63024000 |
| H | 2.23820400  | 4.70380300  | -2.79628400 |
| C | 2.15429900  | 2.99637400  | -1.50765300 |
| H | 2.88092200  | 3.39831600  | -0.81571100 |
| C | 5.67171400  | 1.39460300  | -0.02161400 |
| C | 6.60345600  | 2.24392100  | 0.83996000  |
| H | 6.62185700  | 3.26949600  | 0.45974100  |
| H | 7.62612900  | 1.85365600  | 0.80864800  |
| H | 6.27387700  | 2.27501300  | 1.87973500  |
| C | 6.05178400  | 1.53013700  | -1.50245800 |
| H | 5.38791500  | 0.93857500  | -2.13888600 |
| H | 7.08307300  | 1.21374800  | -1.68565900 |
| H | 5.95484600  | 2.57783700  | -1.79984800 |
| C | 5.49945900  | -0.10486900 | 0.44773100  |
| C | 6.35721900  | -1.12007800 | -0.30673400 |
| H | 6.14668300  | -2.12537800 | 0.06967400  |
| H | 7.42338900  | -0.92031700 | -0.15561900 |
| H | 6.14907600  | -1.10862000 | -1.37832200 |
| C | 5.66873600  | -0.29831600 | 1.95927800  |
| H | 5.06481100  | 0.41493300  | 2.52375700  |
| H | 6.71526700  | -0.19500300 | 2.26268700  |
| H | 5.32556200  | -1.30070100 | 2.22780100  |
| C | 1.62750700  | -0.57587400 | 1.73156900  |
| C | 1.59159900  | -1.94109900 | 2.07832300  |
| H | 1.27355800  | -2.66315100 | 1.33639500  |
| C | 1.97657300  | -2.37442200 | 3.34357500  |

|    |             |             |             |                                     |             |                         |
|----|-------------|-------------|-------------|-------------------------------------|-------------|-------------------------|
| H  | 1.93578600  | -3.43384200 | 3.57992900  |                                     |             |                         |
| C  | 2.40222100  | -1.45886300 | 4.30878400  | <b>L<sub>1</sub>-19<sub>7</sub></b> |             |                         |
| H  | 2.69551200  | -1.79857000 | 5.29792100  |                                     |             |                         |
| C  | 2.44671600  | -0.10007300 | 3.98566900  | Cu                                  | 1.03396400  | -0.07289100 -0.62615700 |
| H  | 2.77974900  | 0.62469800  | 4.72443600  | N                                   | -1.96504100 | 0.78147900 0.40126200   |
| C  | 2.07023300  | 0.33509500  | 2.71665100  | N                                   | 3.62418900  | -0.92984700 0.78428400  |
| H  | 2.13438000  | 1.38977600  | 2.47065800  | N                                   | 2.12570800  | -2.42778200 1.26691700  |
| H  | -5.92933100 | -1.48512300 | 2.08941600  | O                                   | -4.05881100 | 1.85894500 -0.54145400  |
| H  | -4.34165800 | -1.99725100 | 1.48564900  | O                                   | -4.23340900 | -0.21960000 0.40411800  |
| H  | -3.60534100 | 2.14291000  | -3.09892000 | B                                   | -3.41112400 | 0.81182800 0.05121800   |
| H  | -2.29400000 | 1.35918700  | -2.21485400 | C                                   | 2.30592400  | -1.22051900 0.67228300  |
| H  | -0.86764500 | -2.09637700 | -4.73738700 | C                                   | 4.42655900  | -1.98186200 1.45149100  |
| H  | 0.31116100  | -0.81268900 | -4.46416400 | H                                   | 5.17214100  | -2.38770200 0.76164800  |
| H  | 0.19782500  | -5.14397200 | 0.70518600  | C                                   | 3.36234300  | -3.01049000 1.84002600  |
| H  | -1.01484200 | -3.85386700 | 0.76221400  | H                                   | 3.55048700  | -4.00015000 1.41394300  |
| C  | -6.93035400 | 3.11302400  | 0.47588800  | C                                   | 0.89580800  | -3.13118300 1.51069000  |
| H  | -6.41806100 | 3.79096300  | 1.16979000  | C                                   | 0.50797500  | -4.17578900 0.64231400  |
| H  | -7.23412700 | 3.70703100  | -0.39168200 | C                                   | -0.66950500 | -4.87232500 0.93420400  |
| H  | -7.83434700 | 2.75548400  | 0.97730800  | H                                   | -0.97698800 | -5.67208000 0.26415900  |
| C  | 3.72238100  | -4.04438000 | -2.62522400 | C                                   | -1.45431400 | -4.57949600 2.05556000  |
| H  | 3.92976200  | -5.07319800 | -2.31538400 | C                                   | -1.00408600 | -3.59060700 2.93070100  |
| H  | 3.98824700  | -3.94498500 | -3.68199900 | H                                   | -1.57192300 | -3.37739000 3.83373900  |
| H  | 4.39207400  | -3.38934300 | -2.05446700 | C                                   | 0.17790400  | -2.87635400 2.69544400  |
| H  | -4.41357700 | -1.84702400 | -2.77019800 | C                                   | 0.68199000  | -1.93567800 3.76536300  |
| H  | -2.62729600 | -3.39359500 | -3.15681600 | H                                   | 1.41505800  | -1.22343800 3.38467000  |
| C  | -0.93341900 | 1.66094800  | 1.65410000  | C                                   | 1.33599200  | -4.56278700 -0.55585100 |
| Br | -1.89299400 | -2.19790200 | 2.49936700  | H                                   | 2.34195200  | -4.88381400 -0.25946300 |
| C  | -2.28398300 | 1.23721300  | 1.88331400  | C                                   | 4.29903600  | 0.27850600 0.40029300   |
| H  | -3.07181900 | 1.58386600  | 1.22183000  | C                                   | 5.08742700  | 0.29719600 -0.76589400  |
| C  | -2.62221900 | 0.42629800  | 2.94345200  | C                                   | 5.16146600  | -0.88733800 -1.69641300 |
| H  | -1.91434000 | 0.21563400  | 3.73261000  | H                                   | 5.69264500  | -1.73123500 -1.23843200 |
| H  | -3.65268400 | 0.14845100  | 3.12437000  | C                                   | 5.80589900  | 1.46401100 -1.05458400  |
| H  | -0.22897400 | 1.36830900  | 2.42969900  | H                                   | 6.41563300  | 1.48713800 -1.95497500  |
| C  | -0.63824200 | 2.96821300  | 1.03781100  | C                                   | 5.76325800  | 2.59202600 -0.23078000  |
| C  | 0.43773100  | 3.72639300  | 1.53764700  | C                                   | 4.98626800  | 2.53047300 0.93091800   |
| C  | -1.44794800 | 3.55185600  | 0.04306800  | H                                   | 4.95598900  | 3.38807200 1.59938800   |
| C  | 0.69265300  | 5.01417400  | 1.07098500  | C                                   | 4.25886100  | 1.38516300 1.27048400   |
| H  | 1.05788400  | 3.30838100  | 2.32421400  | C                                   | 3.45863700  | 1.35281700 2.55081700   |
| C  | -1.18730200 | 4.83372500  | -0.42928500 | H                                   | 3.68686400  | 0.46551400 3.15200400   |
| H  | -2.28866900 | 2.99708200  | -0.35943800 | C                                   | -1.18494700 | -0.22762400 -0.17837700 |
| C  | -0.11710100 | 5.57409500  | 0.08259100  | H                                   | -0.77067500 | -0.95237100 0.52664500  |
| H  | 1.52298100  | 5.58099800  | 1.48304900  | C                                   | -1.62982300 | 1.36719800 1.64796800   |
| H  | -1.82257600 | 5.26097300  | -1.20021800 | C                                   | -0.51270800 | 0.95777400 2.39408100   |
| H  | 0.07960700  | 6.57706500  | -0.28514700 | H                                   | 0.16174400  | 0.21190500 1.99654600   |

|   |             |             |             |                                       |             |             |             |
|---|-------------|-------------|-------------|---------------------------------------|-------------|-------------|-------------|
| C | -0.25247600 | 1.52948500  | 3.64041100  | H                                     | 1.45367800  | -3.72764600 | -1.25708300 |
| H | 0.61669000  | 1.19641300  | 4.20062400  | C                                     | 6.52085900  | 3.84806900  | -0.59145100 |
| C | -1.08641200 | 2.51129100  | 4.17392200  | H                                     | 5.89397200  | 4.53193500  | -1.17706600 |
| H | -0.87757300 | 2.94508700  | 5.14706800  | H                                     | 6.84583400  | 4.39077900  | 0.30156200  |
| C | -2.18703900 | 2.93407400  | 3.42668600  | H                                     | 7.40594200  | 3.62242400  | -1.19359700 |
| H | -2.83994500 | 3.71407700  | 3.80856800  | C                                     | -2.74875900 | -5.31502900 | 2.30826800  |
| C | -2.45406600 | 2.37900400  | 2.17946900  | H                                     | -2.68576700 | -6.35904100 | 1.98580500  |
| H | -3.27931900 | 2.76014900  | 1.59177000  | H                                     | -3.01765600 | -5.30115400 | 3.36854000  |
| C | -5.49374300 | 1.59066600  | -0.49436200 | H                                     | -3.57590000 | -4.85356500 | 1.75478600  |
| C | -6.08323000 | 1.96724900  | -1.85296200 | H                                     | 4.95614000  | -1.56226300 | 2.31326900  |
| H | -5.95144400 | 3.03959900  | -2.02300300 | H                                     | 3.25470100  | -3.12415800 | 2.92459100  |
| H | -7.15521100 | 1.74815800  | -1.88757900 | C                                     | 0.73300600  | 1.80730000  | -1.51133600 |
| H | -5.59108800 | 1.43232700  | -2.66665000 | Br                                    | 1.57690300  | -1.60773000 | -2.68250600 |
| C | -6.07391300 | 2.50080100  | 0.59524500  | C                                     | 2.14959900  | 1.95750200  | -1.86692600 |
| H | -5.64893600 | 2.27752600  | 1.57704600  | H                                     | 2.79213100  | 2.45399100  | -1.14405400 |
| H | -7.16160500 | 2.40392200  | 0.65969700  | C                                     | 2.68914900  | 1.57744600  | -3.04231300 |
| H | -5.83738900 | 3.54052800  | 0.35210400  | H                                     | 2.10876400  | 1.05791100  | -3.79569500 |
| C | -5.55857100 | 0.03968700  | -0.14065700 | H                                     | 3.73951000  | 1.75111800  | -3.25241400 |
| C | -6.58496000 | -0.33385800 | 0.92943200  | H                                     | 0.11516600  | 1.49645200  | -2.35276200 |
| H | -6.51707000 | -1.40561000 | 1.13519900  | C                                     | 0.14916100  | 2.92494900  | -0.73741000 |
| H | -7.60229100 | -0.11981800 | 0.58613800  | C                                     | -1.08625400 | 3.48043700  | -1.12098900 |
| H | -6.41215000 | 0.19890600  | 1.86594200  | C                                     | 0.82759300  | 3.54142600  | 0.33763300  |
| C | -5.72730700 | -0.87497200 | -1.35872700 | C                                     | -1.61830400 | 4.59569900  | -0.47362400 |
| H | -4.97461900 | -0.67648600 | -2.12327100 | H                                     | -1.61912500 | 3.05794800  | -1.96620900 |
| H | -6.72168300 | -0.76693800 | -1.80258100 | C                                     | 0.29953500  | 4.65163700  | 0.98431500  |
| H | -5.60630100 | -1.91293300 | -1.03753700 | H                                     | 1.77878100  | 3.13758000  | 0.66905500  |
| C | -1.69198800 | -0.79979500 | -1.43675200 | C                                     | -0.93030400 | 5.18781400  | 0.58400200  |
| C | -1.68971200 | -2.19616700 | -1.61706300 | H                                     | -2.57178200 | 4.99984400  | -0.80231500 |
| H | -1.30718200 | -2.83111200 | -0.82663500 | H                                     | 0.84402800  | 5.10141600  | 1.81019300  |
| C | -2.18401000 | -2.76688500 | -2.78538400 | H                                     | -1.33990000 | 6.05737500  | 1.09020000  |
| H | -2.17427100 | -3.84693200 | -2.89907700 |                                       |             |             |             |
| C | -2.66869500 | -1.95965500 | -3.81601400 |                                       |             |             |             |
| H | -3.03616400 | -2.40614400 | -4.73542400 |                                       |             |             |             |
| C | -2.66347200 | -0.57081300 | -3.66129100 |                                       |             |             |             |
| H | -3.02078200 | 0.06852600  | -4.46398500 |                                       |             |             |             |
| C | -2.18913200 | 0.00360700  | -2.48455200 |                                       |             |             |             |
| H | -2.18611600 | 1.08130400  | -2.38176900 |                                       |             |             |             |
| H | 5.70634000  | -0.62252600 | -2.60646800 |                                       |             |             |             |
| H | 4.16190600  | -1.23344300 | -1.98436600 |                                       |             |             |             |
| H | 3.67323000  | 2.23421600  | 3.16101500  |                                       |             |             |             |
| H | 2.38319600  | 1.33889000  | 2.35044700  |                                       |             |             |             |
| H | 1.16051400  | -2.50592000 | 4.57232600  |                                       |             |             |             |
| H | -0.13916700 | -1.36972100 | 4.21120000  |                                       |             |             |             |
| H | 0.87067100  | -5.39840900 | -1.08570200 |                                       |             |             |             |
|   |             |             |             | <b>L<sub>1</sub>-TS20<sub>7</sub></b> |             |             |             |
|   |             |             |             | Cu                                    | -0.79428600 | -0.61630300 | 0.62908800  |
|   |             |             |             | N                                     | 1.48002500  | 1.64904900  | 0.21802100  |
|   |             |             |             | N                                     | -2.55746600 | -1.35184200 | -1.85840800 |
|   |             |             |             | N                                     | -0.66517200 | -2.42135200 | -1.85256500 |
|   |             |             |             | O                                     | 3.23626300  | 3.13128700  | -0.70713400 |
|   |             |             |             | O                                     | 3.72735700  | 0.89144800  | -0.56716200 |
|   |             |             |             | B                                     | 2.79217500  | 1.87762900  | -0.32800800 |
|   |             |             |             | C                                     | -1.35208800 | -1.42124600 | -1.24428300 |
|   |             |             |             | C                                     | -2.78555300 | -2.43737400 | -2.84155200 |
|   |             |             |             | H                                     | -3.50912600 | -3.15539300 | -2.43885900 |
|   |             |             |             | C                                     | -1.38790200 | -3.03603200 | -2.98919300 |

|   |             |             |             |    |             |             |             |
|---|-------------|-------------|-------------|----|-------------|-------------|-------------|
| H | -1.38151200 | -4.12506500 | -2.91265400 | H  | 3.44087000  | 2.08527200  | -3.16900000 |
| C | 0.70828100  | -2.78111200 | -1.64441300 | H  | 4.98570900  | 2.86101200  | -3.57616600 |
| C | 1.02430400  | -4.02669800 | -1.06479500 | H  | 3.56545800  | 3.84930500  | -3.18254300 |
| C | 2.37508200  | -4.34838200 | -0.89196300 | C  | 4.97513200  | 1.55576200  | -0.90852300 |
| H | 2.62524300  | -5.29909400 | -0.42646600 | C  | 5.72352400  | 0.70028700  | -1.92837200 |
| C | 3.40333600  | -3.49205500 | -1.29330300 | H  | 6.00255200  | -0.25427400 | -1.47309800 |
| C | 3.05486100  | -2.29776700 | -1.92899700 | H  | 6.64252300  | 1.19990900  | -2.25252900 |
| H | 3.83693700  | -1.63144100 | -2.27949700 | H  | 5.11416400  | 0.49313800  | -2.80999300 |
| C | 1.72129000  | -1.92942800 | -2.12822100 | C  | 5.79927300  | 1.66836000  | 0.38106600  |
| C | 1.39890800  | -0.65511500 | -2.87555800 | H  | 5.30255900  | 2.30485000  | 1.11770900  |
| H | 1.11208500  | 0.15973400  | -2.20374100 | H  | 6.79625200  | 2.07516600  | 0.18586500  |
| C | -0.03579300 | -5.02667900 | -0.67346100 | H  | 5.90620700  | 0.67390200  | 0.82122200  |
| H | -0.34447100 | -5.62885700 | -1.53914600 | C  | 2.13186000  | -0.16260400 | 1.77079900  |
| C | -3.60852700 | -0.39304500 | -1.66029700 | C  | 2.30307500  | -1.54803900 | 1.94699500  |
| C | -4.63731100 | -0.65085200 | -0.73554500 | H  | 1.69437900  | -2.23903200 | 1.37305800  |
| C | -4.66602800 | -1.91266800 | 0.09091800  | C  | 3.23102500  | -2.04180200 | 2.85993900  |
| H | -4.92362400 | -2.77983100 | -0.53146100 | H  | 3.34350800  | -3.11590500 | 2.97831300  |
| C | -5.67775500 | 0.27946100  | -0.63505800 | C  | 4.01418500  | -1.16622000 | 3.61736900  |
| H | -6.46891500 | 0.09554600  | 0.08747700  | H  | 4.74282100  | -1.55318200 | 4.32434600  |
| C | -5.73363300 | 1.42582400  | -1.43122000 | C  | 3.84601200  | 0.21045300  | 3.46160700  |
| C | -4.72459800 | 1.62139700  | -2.37866000 | H  | 4.44107700  | 0.90261900  | 4.05157700  |
| H | -4.76947100 | 2.48796500  | -3.03487600 | C  | 2.90966300  | 0.70596800  | 2.55459900  |
| C | -3.66143900 | 0.72372100  | -2.51790600 | H  | 2.78567600  | 1.77842400  | 2.44380600  |
| C | -2.63532600 | 0.93587200  | -3.60795900 | H  | -5.42711500 | -1.84039700 | 0.87190300  |
| H | -2.72388600 | 0.17573300  | -4.39429000 | H  | -3.70582500 | -2.13020600 | 0.56711100  |
| C | 1.15705700  | 0.32276100  | 0.75935500  | H  | -2.77384400 | 1.90981700  | -4.08443200 |
| H | 1.11561600  | -0.42440600 | -0.04340600 | H  | -1.61007800 | 0.88701700  | -3.23321500 |
| C | 0.51152500  | 2.67364000  | -0.05069900 | H  | 0.57309700  | -0.79560400 | -3.57976800 |
| C | -0.60696800 | 2.43980300  | -0.85819400 | H  | 2.27076500  | -0.31895200 | -3.44245800 |
| H | -0.79654500 | 1.43703300  | -1.22407400 | H  | 0.35245100  | -5.72049500 | 0.07661100  |
| C | -1.48808700 | 3.47864000  | -1.16364200 | H  | -0.91213000 | -4.53659300 | -0.24706200 |
| H | -2.36442000 | 3.27185800  | -1.76870800 | C  | -6.84545100 | 2.43275500  | -1.25899800 |
| C | -1.25538400 | 4.76834800  | -0.68569400 | H  | -6.98831400 | 3.03431300  | -2.16153400 |
| H | -1.93810100 | 5.57616300  | -0.93304300 | H  | -7.79579800 | 1.94491500  | -1.02055600 |
| C | -0.14136000 | 5.00864800  | 0.12166700  | H  | -6.61946700 | 3.12211200  | -0.43599600 |
| H | 0.04904000  | 6.00585600  | 0.50872700  | C  | 4.84971200  | -3.83681800 | -1.03122300 |
| C | 0.73017200  | 3.96887400  | 0.44435700  | H  | 5.50553200  | -3.44239300 | -1.81382600 |
| H | 1.59884300  | 4.15582600  | 1.06533700  | H  | 5.18167800  | -3.40621700 | -0.07833600 |
| C | 4.46966900  | 2.94933500  | -1.44809300 | H  | 5.00174300  | -4.91876400 | -0.97265800 |
| C | 5.38759200  | 4.13432300  | -1.15422700 | H  | -3.18605600 | -2.03628700 | -3.77602100 |
| H | 4.92906300  | 5.05393400  | -1.52908300 | H  | -0.90197200 | -2.75618000 | -3.93291000 |
| H | 6.35540300  | 4.01209100  | -1.65191000 | C  | -0.53048400 | 0.74772500  | 2.28617000  |
| H | 5.55889900  | 4.25602800  | -0.08334100 | H  | 0.04315200  | 1.66715600  | 2.23080000  |
| C | 4.09950600  | 2.92718800  | -2.93770600 | Br | -1.35697300 | -2.79478800 | 1.80475400  |

|   |             |             |            |
|---|-------------|-------------|------------|
| C | -0.21023600 | -0.00142300 | 3.53136300 |
| H | -0.61512900 | -1.00420500 | 3.62265700 |
| C | 0.47457400  | 0.53316600  | 4.54879900 |
| H | 0.89019000  | 1.53606600  | 4.50519200 |
| H | 0.63022000  | -0.01886400 | 5.47109400 |
| C | -2.00180000 | 1.11072600  | 2.20702800 |
| C | -3.02902500 | 0.22989900  | 2.60951800 |
| C | -2.35481100 | 2.44847800  | 1.93832200 |
| C | -4.34048500 | 0.67889600  | 2.74775300 |
| H | -2.79380600 | -0.80693000 | 2.81956100 |
| C | -3.66890100 | 2.89041600  | 2.07146900 |
| H | -1.58365300 | 3.15805500  | 1.66491300 |
| C | -4.67081700 | 2.00889700  | 2.48086300 |
| H | -5.10628500 | -0.01745700 | 3.07851400 |
| H | -3.90302200 | 3.93262100  | 1.87207500 |
| H | -5.69349100 | 2.35630900  | 2.60070100 |

**L<sub>1</sub>-17<sub>g</sub>**

|    |             |             |             |
|----|-------------|-------------|-------------|
| Cu | -1.11260000 | 0.87895200  | 0.43959900  |
| N  | -1.69762600 | -1.98571300 | 0.07531200  |
| N  | -2.31078300 | 3.32479300  | -0.64082300 |
| N  | -0.88770100 | 3.77454800  | 0.94944000  |
| O  | -3.03513700 | -4.11209700 | 0.14539200  |
| O  | -2.61318500 | -3.01087700 | 2.11750100  |
| B  | -2.43174200 | -3.01198400 | 0.74057200  |
| C  | -1.42667200 | 2.77788900  | 0.21420300  |
| C  | -2.36595400 | 4.80171600  | -0.56279000 |
| H  | -1.95557100 | 5.24367400  | -1.47798500 |
| C  | -1.50040700 | 5.09488200  | 0.67391200  |
| H  | -0.73466000 | 5.85263500  | 0.48927100  |
| C  | 0.02022600  | 3.60055900  | 2.04926500  |
| C  | 1.38111300  | 3.90639000  | 1.86595900  |
| C  | 2.24354100  | 3.76773400  | 2.95870200  |
| H  | 3.29707500  | 4.00284100  | 2.82588000  |
| C  | 1.79216700  | 3.33638800  | 4.20943200  |
| C  | 0.43100700  | 3.05220300  | 4.35890500  |
| H  | 0.05808000  | 2.72610800  | 5.32715500  |
| C  | -0.47266000 | 3.18011300  | 3.29923400  |
| C  | -1.93249300 | 2.85204700  | 3.50455000  |
| H  | -2.58999800 | 3.64167700  | 3.12568800  |
| C  | 1.91828200  | 4.35255200  | 0.52690700  |
| H  | 1.41346500  | 5.25172300  | 0.15644600  |
| C  | -3.06466600 | 2.60065800  | -1.62784400 |

|   |             |             |             |
|---|-------------|-------------|-------------|
| C | -2.49076300 | 2.34281600  | -2.88588900 |
| C | -1.07610800 | 2.76013100  | -3.20650700 |
| H | -0.90659400 | 3.82663100  | -3.02053300 |
| C | -3.25680200 | 1.65414100  | -3.82887400 |
| H | -2.81684000 | 1.43165900  | -4.79742000 |
| C | -4.55765800 | 1.22118000  | -3.55241100 |
| C | -5.09979400 | 1.50636500  | -2.29650100 |
| H | -6.10986200 | 1.17665800  | -2.06481500 |
| C | -4.37247900 | 2.19102300  | -1.31784000 |
| C | -4.97580000 | 2.44991400  | 0.04239300  |
| H | -5.01236100 | 3.51890300  | 0.28334600  |
| C | -0.97260200 | -1.02368100 | 0.95267000  |
| H | -1.54975200 | -0.98740300 | 1.88330400  |
| C | -1.57910100 | -1.88297100 | -1.33143800 |
| C | -0.50296100 | -1.18808600 | -1.91822400 |
| H | 0.25696800  | -0.74144000 | -1.29021300 |
| C | -0.37880600 | -1.08668800 | -3.30474200 |
| H | 0.47596900  | -0.55249000 | -3.71126100 |
| C | -1.31740200 | -1.67345500 | -4.15228200 |
| H | -1.21192400 | -1.60585200 | -5.23147500 |
| C | -2.39117400 | -2.36187000 | -3.58106700 |
| H | -3.13732800 | -2.83143300 | -4.21836000 |
| C | -2.52953500 | -2.46150500 | -2.19859500 |
| H | -3.36923600 | -3.00232800 | -1.78384200 |
| C | -3.83210500 | -4.77772200 | 1.15511700  |
| C | -3.78523900 | -6.28197200 | 0.89206300  |
| H | -4.25651600 | -6.50151800 | -0.07057000 |
| H | -4.32796100 | -6.83232500 | 1.66819300  |
| H | -2.75868000 | -6.65051200 | 0.85483500  |
| C | -5.27065000 | -4.26080800 | 1.00870900  |
| H | -5.32114700 | -3.18282800 | 1.18695100  |
| H | -5.95593100 | -4.76029300 | 1.70057500  |
| H | -5.61419500 | -4.45230100 | -0.01193400 |
| C | -3.13786800 | -4.30535600 | 2.49034600  |
| C | -4.07556300 | -4.12367600 | 3.68326500  |
| H | -3.50535400 | -3.76315500 | 4.54450600  |
| H | -4.54429700 | -5.07357800 | 3.96208900  |
| H | -4.86072000 | -3.39533800 | 3.47147000  |
| C | -1.94082200 | -5.17976000 | 2.88992100  |
| H | -1.25372600 | -5.31415600 | 2.05005700  |
| H | -2.25629000 | -6.16542800 | 3.24609700  |
| H | -1.39228600 | -4.68018700 | 3.69301700  |
| C | 0.40942700  | -1.47307600 | 1.34241600  |
| C | 1.08343800  | -0.81881300 | 2.39741400  |

|    |             |             |             |
|----|-------------|-------------|-------------|
| H  | 0.59319300  | 0.01502200  | 2.89653700  |
| C  | 2.34930300  | -1.21620800 | 2.81645800  |
| H  | 2.83053700  | -0.69202200 | 3.63919200  |
| C  | 3.00246500  | -2.28629100 | 2.19219900  |
| H  | 3.99004000  | -2.59882300 | 2.51936000  |
| C  | 2.35534800  | -2.94505700 | 1.14681100  |
| H  | 2.83580400  | -3.78881600 | 0.65558300  |
| C  | 1.08129700  | -2.54606900 | 0.72717400  |
| H  | 0.59368100  | -3.08529800 | -0.07826400 |
| H  | -0.84755300 | 2.56544600  | -4.25708500 |
| H  | -0.35281800 | 2.20552700  | -2.59947800 |
| H  | -5.99796800 | 2.06609700  | 0.08975000  |
| H  | -4.39468900 | 1.96154800  | 0.83209700  |
| H  | -2.15084100 | 2.71363500  | 4.56643900  |
| H  | -2.20508200 | 1.92869400  | 2.98022500  |
| H  | 2.98411400  | 4.58445500  | 0.59976000  |
| H  | 1.79653400  | 3.57654300  | -0.23614100 |
| C  | -5.33472600 | 0.42932900  | -4.57597900 |
| H  | -6.40021000 | 0.39070400  | -4.33210900 |
| H  | -5.22956600 | 0.85573900  | -5.57905400 |
| H  | -4.96351700 | -0.60143900 | -4.62037400 |
| C  | 2.75075500  | 3.16106800  | 5.36350100  |
| H  | 3.63459500  | 3.79550400  | 5.25025800  |
| H  | 2.27649800  | 3.40475800  | 6.31914900  |
| H  | 3.09971100  | 2.12314500  | 5.43046300  |
| H  | -3.39823900 | 5.14591000  | -0.45459100 |
| H  | -2.09476200 | 5.41826200  | 1.53711600  |
| C  | 3.53511600  | 0.49104600  | -0.41963000 |
| Br | 2.65380900  | 1.36386100  | -2.03196100 |
| C  | 4.93884500  | 0.14544000  | -0.72896500 |
| C  | 5.37050500  | -1.12586700 | -0.80548600 |
| H  | 4.63876900  | -1.91503700 | -0.63684900 |
| H  | 5.61692900  | 0.98058600  | -0.88970800 |
| H  | 3.42593300  | 1.25703800  | 0.34664900  |
| H  | 2.90888900  | -0.36836800 | -0.19010000 |
| C  | 6.73516000  | -1.59192200 | -1.07904500 |
| C  | 6.98047600  | -2.97671500 | -1.10606300 |
| C  | 7.81817600  | -0.72453400 | -1.32055900 |
| C  | 8.25412600  | -3.48023500 | -1.36516400 |
| H  | 6.15646600  | -3.66161800 | -0.92287500 |
| C  | 9.08985400  | -1.22627100 | -1.57924800 |
| H  | 7.66465500  | 0.35014300  | -1.30824200 |
| C  | 9.31544800  | -2.60638100 | -1.60299900 |
| H  | 8.41669600  | -4.55416500 | -1.38173100 |

|   |             |             |             |
|---|-------------|-------------|-------------|
| H | 9.91081000  | -0.53913400 | -1.76433100 |
| H | 10.30961400 | -2.99400600 | -1.80563800 |

**L<sub>1</sub>-TS18<sub>g</sub>**

|    |             |             |             |
|----|-------------|-------------|-------------|
| Cu | 0.26155400  | 0.83402000  | -0.30478000 |
| N  | -1.45932500 | -1.56120500 | 0.21567300  |
| N  | -1.74089100 | 3.08439300  | -0.75316900 |
| N  | -0.11448500 | 3.73455900  | 0.53578700  |
| O  | -3.44870300 | -3.00203800 | 0.74383700  |
| O  | -2.70680900 | -1.52133900 | 2.33775200  |
| B  | -2.51774800 | -2.02266200 | 1.05519800  |
| C  | -0.61065500 | 2.67539200  | -0.14499100 |
| C  | -2.05477800 | 4.51609100  | -0.53398400 |
| H  | -2.00303300 | 5.06517000  | -1.48017900 |
| C  | -0.96475700 | 4.94595500  | 0.45979200  |
| H  | -0.38683400 | 5.80662400  | 0.11068000  |
| C  | 1.03923400  | 3.71321000  | 1.38799300  |
| C  | 2.26439900  | 4.21237000  | 0.90618300  |
| C  | 3.36455600  | 4.21172300  | 1.77208200  |
| H  | 4.31469300  | 4.59630100  | 1.40782100  |
| C  | 3.27691800  | 3.73703700  | 3.08462700  |
| C  | 2.03934500  | 3.26815600  | 3.53654600  |
| H  | 1.94551900  | 2.91279800  | 4.56028300  |
| C  | 0.90876900  | 3.25417600  | 2.71262700  |
| C  | -0.41774600 | 2.76728000  | 3.24649500  |
| H  | -1.18118700 | 3.55314600  | 3.20930600  |
| C  | 2.40757600  | 4.72146600  | -0.50803300 |
| H  | 1.71289300  | 5.54183800  | -0.72067400 |
| C  | -2.61359800 | 2.27870300  | -1.56215400 |
| C  | -2.43653200 | 2.25110100  | -2.95869000 |
| C  | -1.31080800 | 2.99882900  | -3.62956800 |
| H  | -1.34064700 | 4.07237100  | -3.40834400 |
| C  | -3.33273600 | 1.49633500  | -3.72025100 |
| H  | -3.19762000 | 1.45929200  | -4.79863400 |
| C  | -4.38898000 | 0.78875200  | -3.13838400 |
| C  | -4.55119300 | 0.86223900  | -1.75297100 |
| H  | -5.37678600 | 0.33139400  | -1.28418800 |
| C  | -3.67753800 | 1.59770000  | -0.94504000 |
| C  | -3.88154900 | 1.62833600  | 0.55164800  |
| H  | -3.66594900 | 2.61062500  | 0.98193400  |
| C  | -0.42364200 | -0.74004900 | 0.88817000  |
| H  | -0.94174500 | -0.10423200 | 1.60869100  |
| C  | -1.29841100 | -1.96891900 | -1.13494400 |

|   |             |             |             |                                     |             |             |             |
|---|-------------|-------------|-------------|-------------------------------------|-------------|-------------|-------------|
| C | -0.03410800 | -1.95867600 | -1.74994300 | H                                   | -0.79959600 | 1.92250200  | 2.66626500  |
| H | 0.83434500  | -1.63715800 | -1.18957600 | H                                   | 3.42023300  | 5.09617700  | -0.67958400 |
| C | 0.12071100  | -2.35289400 | -3.08010500 | H                                   | 2.20739700  | 3.92525000  | -1.23330000 |
| H | 1.11168100  | -2.32015300 | -3.52385600 | C                                   | -5.30965700 | -0.05596500 | -3.98560200 |
| C | -0.97240100 | -2.78102100 | -3.83014300 | H                                   | -6.28101100 | -0.20170700 | -3.50350200 |
| H | -0.84815000 | -3.09344600 | -4.86298200 | H                                   | -5.48024500 | 0.39554300  | -4.96798700 |
| C | -2.23235500 | -2.79735200 | -3.22656300 | H                                   | -4.87201300 | -1.04749700 | -4.15406700 |
| H | -3.10189400 | -3.12630500 | -3.79108200 | C                                   | 4.49045900  | 3.71666700  | 3.98417900  |
| C | -2.40064500 | -2.38958800 | -1.90586400 | H                                   | 5.17482300  | 4.53810900  | 3.75158100  |
| H | -3.38692100 | -2.40388600 | -1.46291700 | H                                   | 4.20903800  | 3.79618600  | 5.03843900  |
| C | -4.42457300 | -3.04551300 | 1.81359200  | H                                   | 5.05312200  | 2.78205900  | 3.86713200  |
| C | -4.85242400 | -4.49889600 | 2.01326100  | H                                   | -3.06748900 | 4.62818900  | -0.13433000 |
| H | -5.36438500 | -4.85707700 | 1.11527800  | H                                   | -1.36704900 | 5.19028800  | 1.45001300  |
| H | -5.54405600 | -4.59196100 | 2.85741300  | C                                   | 3.11653500  | 0.50162700  | 0.09718300  |
| H | -3.99375100 | -5.14844800 | 2.19098600  | Br                                  | 1.82728400  | 1.32542900  | -2.25631800 |
| C | -5.62641700 | -2.20115400 | 1.36755100  | C                                   | 4.04562900  | -0.33946600 | -0.52935900 |
| H | -5.33867700 | -1.15750600 | 1.21433300  | C                                   | 4.05125400  | -1.70161300 | -0.33131400 |
| H | -6.44028700 | -2.23414200 | 2.09840900  | H                                   | 3.30306500  | -2.11292000 | 0.34303300  |
| H | -6.00237900 | -2.59291900 | 0.41807500  | H                                   | 4.77561400  | 0.12156200  | -1.18856400 |
| C | -3.62897200 | -2.40651800 | 3.01760300  | H                                   | 3.27011000  | 1.57061800  | 0.12226400  |
| C | -4.47101100 | -1.57982200 | 3.98813700  | H                                   | 2.40405700  | 0.08296500  | 0.79716000  |
| H | -3.82566400 | -1.15514500 | 4.76276700  | C                                   | 4.96645400  | -2.65842800 | -0.91640800 |
| H | -5.22463600 | -2.20327500 | 4.48081400  | C                                   | 4.89393700  | -4.00498600 | -0.49457600 |
| H | -4.97716300 | -0.75594000 | 3.48179100  | C                                   | 5.92705100  | -2.31730000 | -1.89643300 |
| C | -2.78413600 | -3.42825300 | 3.79189300  | C                                   | 5.74653100  | -4.96838300 | -1.02284700 |
| H | -2.16582200 | -4.02314700 | 3.11435300  | H                                   | 4.15878300  | -4.27676300 | 0.25737400  |
| H | -3.40749400 | -4.10543500 | 4.38398400  | C                                   | 6.77623800  | -3.28269100 | -2.42186700 |
| H | -2.11450400 | -2.89155700 | 4.46936000  | H                                   | 5.99547800  | -1.29583100 | -2.25570600 |
| C | 0.59413800  | -1.52897400 | 1.62411500  | C                                   | 6.69196400  | -4.61103800 | -1.98769400 |
| C | 1.34939200  | -0.92222800 | 2.65881400  | H                                   | 5.67482700  | -5.99810300 | -0.68535000 |
| H | 1.16028100  | 0.12083400  | 2.90296300  | H                                   | 7.50508300  | -3.00476900 | -3.17756600 |
| C | 2.30797700  | -1.62890800 | 3.38003600  | H                                   | 7.35767700  | -5.36183800 | -2.40329300 |
| H | 2.86092600  | -1.12674500 | 4.17027900  |                                     |             |             |             |
| C | 2.55419800  | -2.97798200 | 3.10394400  |                                     |             |             |             |
| H | 3.29618300  | -3.53244800 | 3.67100300  |                                     |             |             |             |
| C | 1.80936800  | -3.60293700 | 2.09908900  |                                     |             |             |             |
| H | 1.96298300  | -4.65928300 | 1.88828200  |                                     |             |             |             |
| C | 0.85376500  | -2.89525100 | 1.36791500  |                                     |             |             |             |
| H | 0.28025600  | -3.40724900 | 0.60314600  |                                     |             |             |             |
| H | -1.37095700 | 2.88541200  | -4.71508000 |                                     |             |             |             |
| H | -0.33524200 | 2.62332300  | -3.30193100 |                                     |             |             |             |
| H | -4.91585000 | 1.37384600  | 0.80102200  |                                     |             |             |             |
| H | -3.23257600 | 0.90497400  | 1.05733800  |                                     |             |             |             |
| H | -0.32237700 | 2.44895200  | 4.28767100  |                                     |             |             |             |
|   |             |             |             | <b>L<sub>1</sub>-19<sub>8</sub></b> |             |             |             |
|   |             |             |             | Cu                                  | 0.56306600  | 0.96172400  | -0.45661700 |
|   |             |             |             | N                                   | -0.69523700 | -1.48840800 | 0.38100900  |
|   |             |             |             | N                                   | -2.33469300 | 2.20375400  | -1.23709100 |
|   |             |             |             | N                                   | -1.09109900 | 3.36473500  | 0.12437100  |
|   |             |             |             | O                                   | -2.21581600 | -3.32353700 | 1.15882100  |
|   |             |             |             | O                                   | -1.97739200 | -1.46082300 | 2.48425500  |
|   |             |             |             | B                                   | -1.62767600 | -2.08343700 | 1.29584700  |
|   |             |             |             | C                                   | -1.22652100 | 2.15448900  | -0.46933200 |
|   |             |             |             | C                                   | -2.99712100 | 3.53262400  | -1.23527400 |

|   |             |             |             |   |             |             |             |
|---|-------------|-------------|-------------|---|-------------|-------------|-------------|
| H | -2.99107100 | 3.95439500  | -2.24449500 | H | -1.99048000 | -5.25962400 | 2.95089700  |
| C | -2.13827500 | 4.34085900  | -0.25349000 | C | -4.53857500 | -3.22876600 | 1.76864200  |
| H | -1.69035900 | 5.22443900  | -0.71662900 | H | -4.63445400 | -2.19365800 | 1.43263200  |
| C | -0.13069000 | 3.70792400  | 1.13735600  | H | -5.29166200 | -3.41617600 | 2.54007800  |
| C | 0.98204100  | 4.51045900  | 0.80975900  | H | -4.74962800 | -3.88172700 | 0.91717200  |
| C | 1.88673000  | 4.83325100  | 1.82706400  | C | -2.59648500 | -2.46512700 | 3.33120400  |
| H | 2.75431100  | 5.43928300  | 1.57621900  | C | -3.67940600 | -1.78904400 | 4.17015400  |
| C | 1.70617600  | 4.41211000  | 3.14766400  | H | -3.21845600 | -1.05637600 | 4.83896700  |
| C | 0.56072800  | 3.67072600  | 3.45016300  | H | -4.20993400 | -2.52124200 | 4.78780700  |
| H | 0.37636800  | 3.37166500  | 4.47972200  | H | -4.40696400 | -1.26613400 | 3.54704300  |
| C | -0.37373400 | 3.31630800  | 2.46985900  | C | -1.49088700 | -3.01441400 | 4.24377100  |
| C | -1.61993300 | 2.56150600  | 2.87374200  | H | -0.68905900 | -3.47704700 | 3.66243100  |
| H | -2.50483200 | 2.91838900  | 2.33955500  | H | -1.87870800 | -3.74937600 | 4.95560200  |
| C | 1.19889600  | 5.04785200  | -0.58409100 | H | -1.05403500 | -2.18543300 | 4.80689300  |
| H | 0.51134400  | 5.87644900  | -0.79854100 | C | 1.23219400  | -1.03939200 | 1.89268900  |
| C | -3.03282800 | 1.10984100  | -1.86091800 | C | 1.69219900  | -0.27622200 | 2.98752300  |
| C | -2.98234100 | 0.93303600  | -3.25637100 | H | 1.29005100  | 0.72239800  | 3.14130800  |
| C | -2.18568300 | 1.84495800  | -4.15453000 | C | 2.63829600  | -0.77873500 | 3.87681100  |
| H | -2.69187200 | 2.81146600  | -4.28218600 | H | 2.96813200  | -0.16763800 | 4.71291600  |
| C | -3.74207200 | -0.10087800 | -3.81616400 | C | 3.15321600  | -2.06778200 | 3.70515000  |
| H | -3.69285100 | -0.25398800 | -4.89167200 | H | 3.88703000  | -2.46365200 | 4.40137800  |
| C | -4.56421900 | -0.92599300 | -3.04617800 | C | 2.70069000  | -2.84288100 | 2.63638300  |
| C | -4.63921100 | -0.68179000 | -1.67181100 | H | 3.08219500  | -3.85064900 | 2.49494300  |
| H | -5.30523000 | -1.28437700 | -1.05828000 | C | 1.75598900  | -2.33731100 | 1.74017700  |
| C | -3.89160100 | 0.32977500  | -1.06170300 | H | 1.41143200  | -2.96178900 | 0.92387900  |
| C | -4.04726200 | 0.59126700  | 0.41764100  | H | -2.08080600 | 1.40444500  | -5.14952000 |
| H | -4.19422500 | 1.65516900  | 0.63139000  | H | -1.18635000 | 2.03529000  | -3.75691500 |
| C | 0.17810200  | -0.47773500 | 1.00070300  | H | -4.91832100 | 0.05734500  | 0.80742500  |
| H | -0.44818900 | 0.19073500  | 1.58567500  | H | -3.17378000 | 0.26615600  | 0.98916000  |
| C | -0.41933600 | -2.05247400 | -0.89772600 | H | -1.80267800 | 2.68239000  | 3.94511700  |
| C | 0.85291000  | -1.96349000 | -1.48298300 | H | -1.54476600 | 1.48664000  | 2.67827600  |
| H | 1.65958300  | -1.46462700 | -0.96304300 | H | 2.21391200  | 5.44035600  | -0.68819700 |
| C | 1.10176600  | -2.52548900 | -2.73684800 | H | 1.05059000  | 4.27979300  | -1.34811900 |
| H | 2.09877300  | -2.44116400 | -3.15964500 | C | -5.34423200 | -2.05331000 | -3.67943900 |
| C | 0.09533700  | -3.19216700 | -3.43151000 | H | -6.25570900 | -2.27803700 | -3.11694400 |
| H | 0.29247300  | -3.63201600 | -4.40465400 | H | -5.62886500 | -1.81556500 | -4.70890000 |
| C | -1.17467500 | -3.27813400 | -2.85606800 | H | -4.74643600 | -2.97277800 | -3.71269600 |
| H | -1.97797700 | -3.78519900 | -3.38458600 | C | 2.72075000  | 4.74919400  | 4.21438300  |
| C | -1.43663500 | -2.71084500 | -1.61225900 | H | 3.15612600  | 5.74040200  | 4.05431100  |
| H | -2.43131200 | -2.77467600 | -1.19211000 | H | 2.27412100  | 4.73061700  | 5.21283300  |
| C | -3.12047100 | -3.52039900 | 2.27648700  | H | 3.54797900  | 4.02864400  | 4.21171800  |
| C | -3.01901400 | -4.98026100 | 2.71771500  | H | -4.03895900 | 3.43423300  | -0.91386700 |
| H | -3.36942000 | -5.63061100 | 1.91121000  | H | -2.69023900 | 4.66698700  | 0.63540200  |
| H | -3.64251200 | -5.16661900 | 3.59856800  | C | 2.56353500  | 1.05249300  | 0.06297200  |



|    |            |             |             |   |             |             |             |
|----|------------|-------------|-------------|---|-------------|-------------|-------------|
| Br | 1.15875400 | 1.92240500  | -2.66326400 | H | -0.08842000 | 5.64554300  | -0.68370600 |
| C  | 3.47058600 | 0.25742700  | -0.72809600 | C | -3.54015400 | 1.51891600  | -0.66517700 |
| C  | 4.22123100 | -0.76272400 | -0.22986600 | C | -3.77820200 | 1.62340500  | -2.04887900 |
| H  | 4.14171300 | -0.98447400 | 0.83218600  | C | -3.10429500 | 2.67339300  | -2.89492500 |
| H  | 3.52742200 | 0.51772600  | -1.78170800 | H | -3.24664000 | 3.68076500  | -2.48726400 |
| H  | 2.54132700 | 2.10784800  | -0.20712500 | C | -4.66208300 | 0.70914500  | -2.63400900 |
| H  | 2.59930000 | 0.87806000  | 1.13293700  | H | -4.84277800 | 0.77408100  | -3.70429800 |
| C  | 5.16357200 | -1.59716400 | -0.97131300 | C | -5.32436900 | -0.26861200 | -1.88713200 |
| C  | 5.92097200 | -2.55464400 | -0.26688000 | C | -5.08240600 | -0.32568100 | -0.51064600 |
| C  | 5.35748700 | -1.50005100 | -2.36604100 | H | -5.60542000 | -1.06517100 | 0.09134700  |
| C  | 6.83443000 | -3.37774400 | -0.92114300 | C | -4.19620300 | 0.55333200  | 0.12119900  |
| H  | 5.78062400 | -2.64623700 | 0.80717800  | C | -3.95555200 | 0.43810600  | 1.60889300  |
| C  | 6.27014600 | -2.32263000 | -3.01793500 | H | -3.80908400 | 1.41187300  | 2.08390300  |
| H  | 4.78712800 | -0.77771400 | -2.94143600 | C | 0.45663300  | -0.74762100 | 0.90283700  |
| C  | 7.01491000 | -3.26535200 | -2.30098800 | H | -0.15780200 | -0.12980600 | 1.55776000  |
| H  | 7.40574100 | -4.10784000 | -0.35442900 | C | -0.27199300 | -1.80124400 | -1.33250600 |
| H  | 6.40221700 | -2.23072000 | -4.09246700 | C | 0.94723600  | -2.07038700 | -1.96621200 |
| H  | 7.72608900 | -3.90574200 | -2.81471400 | H | 1.86515400  | -2.09428500 | -1.39470900 |

#### L<sub>1</sub>-TS20<sub>8</sub>

|    |             |             |             |   |             |             |             |
|----|-------------|-------------|-------------|---|-------------|-------------|-------------|
| Cu | 0.04537700  | 1.12260600  | -0.41246800 | H | 1.94890200  | -2.48364300 | -3.81740100 |
| N  | -0.39118300 | -1.61913500 | 0.08827700  | C | -0.17677200 | -2.25868500 | -4.10466700 |
| N  | -2.70228400 | 2.48971800  | -0.01737600 | H | -0.13768000 | -2.42888100 | -5.17660800 |
| N  | -1.03234700 | 3.51052700  | 0.93124600  | C | -1.39435400 | -1.99615000 | -3.47567500 |
| O  | -1.77620100 | -3.66753300 | 0.33405300  | H | -2.31212800 | -1.95518100 | -4.05550300 |
| O  | -1.60460500 | -2.25761500 | 2.14658500  | C | -1.44239100 | -1.76104000 | -2.10353700 |
| B  | -1.25805900 | -2.48934400 | 0.82546800  | H | -2.38686300 | -1.53247400 | -1.62120500 |
| C  | -1.38844300 | 2.38583900  | 0.26672900  | C | -2.64936100 | -4.22690900 | 1.34699200  |
| C  | -3.32113200 | 3.74758000  | 0.46625400  | C | -2.46670200 | -5.74444000 | 1.34724000  |
| H  | -3.75052300 | 4.30605300  | -0.37099700 | H | -2.79365100 | -6.15103400 | 0.38599600  |
| C  | -2.13861000 | 4.47389800  | 1.12462100  | H | -3.06758900 | -6.21072000 | 2.13524100  |
| H  | -1.90567400 | 5.42814100  | 0.64156400  | H | -1.42191900 | -6.02446700 | 1.49181400  |
| C  | 0.27434000  | 3.79098900  | 1.45564600  | C | -4.08756100 | -3.87528900 | 0.94733400  |
| C  | 1.18274800  | 4.55299500  | 0.69606500  | H | -4.23636500 | -2.79342100 | 0.92072100  |
| C  | 2.44046500  | 4.81831100  | 1.25085400  | H | -4.81935200 | -4.31420300 | 1.63258900  |
| H  | 3.15193700  | 5.40078000  | 0.67018300  | H | -4.27789900 | -4.26430400 | -0.05681000 |
| C  | 2.80785000  | 4.35911300  | 2.51933000  | C | -2.16227200 | -3.49588300 | 2.66495700  |
| C  | 1.87031700  | 3.62720000  | 3.25569000  | C | -3.26777400 | -3.15055900 | 3.66093600  |
| H  | 2.12990200  | 3.27865500  | 4.25287300  | H | -2.83950200 | -2.60865800 | 4.50930500  |
| C  | 0.59985000  | 3.33770600  | 2.74808600  | H | -3.74241900 | -4.05905200 | 4.04626600  |
| C  | -0.39625600 | 2.56429700  | 3.58079100  | H | -4.03754500 | -2.52049000 | 3.21197000  |
| H  | -1.28823600 | 3.16157900  | 3.80460300  | C | -1.02172100 | -4.22949900 | 3.38325500  |
| C  | 0.83688200  | 5.05860200  | -0.68336700 | H | -0.20464000 | -4.46439300 | 2.69649800  |
|    |             |             |             | H | -1.36709600 | -5.15730500 | 3.84924800  |
|    |             |             |             | H | -0.61996400 | -3.57878300 | 4.16462400  |

|    |             |             |             |
|----|-------------|-------------|-------------|
| C  | 1.49320700  | -1.44709200 | 1.70240900  |
| C  | 1.93924000  | -0.88473000 | 2.91760300  |
| H  | 1.51853800  | 0.06195000  | 3.24789000  |
| C  | 2.89235100  | -1.52319300 | 3.70447000  |
| H  | 3.21140400  | -1.06894500 | 4.63869200  |
| C  | 3.42751100  | -2.75306300 | 3.30423300  |
| H  | 4.16821800  | -3.25511900 | 3.91989900  |
| C  | 2.98745200  | -3.33234300 | 2.11458400  |
| H  | 3.38683900  | -4.29101700 | 1.79525400  |
| C  | 2.03437900  | -2.68858600 | 1.32150100  |
| H  | 1.68553500  | -3.16677500 | 0.41393100  |
| H  | -3.51256300 | 2.66606100  | -3.90895800 |
| H  | -2.02379900 | 2.49639900  | -2.95728100 |
| H  | -4.80581400 | -0.04758900 | 2.09695900  |
| H  | -3.06671000 | -0.16554300 | 1.82404600  |
| H  | 0.04527600  | 2.26648000  | 4.53545700  |
| H  | -0.74186500 | 1.66091500  | 3.06886200  |
| H  | 1.63504800  | 5.70063300  | -1.06477100 |
| H  | 0.70003100  | 4.22987200  | -1.38917600 |
| C  | -6.30866400 | -1.21211500 | -2.53829400 |
| H  | -7.33927200 | -0.85554600 | -2.41632000 |
| H  | -6.12092100 | -1.30684300 | -3.61153700 |
| H  | -6.25773800 | -2.21170100 | -2.09546000 |
| C  | 4.18728300  | 4.63074600  | 3.07165600  |
| H  | 4.89978600  | 3.86353300  | 2.74418100  |
| H  | 4.57254600  | 5.59624400  | 2.73008500  |
| H  | 4.18854000  | 4.63149500  | 4.16574200  |
| H  | -4.12976800 | 3.52314500  | 1.17012900  |
| H  | -2.29659900 | 4.66680600  | 2.19116000  |
| C  | 2.12485200  | 0.79752600  | 0.14135800  |
| Br | 0.53387600  | 1.81712000  | -2.74351700 |
| C  | 3.03214500  | 0.14496000  | -0.77093100 |
| C  | 4.07642100  | -0.62618200 | -0.37053900 |
| H  | 4.23476400  | -0.76394300 | 0.69729300  |
| H  | 2.83577600  | 0.32537800  | -1.82413500 |
| H  | 1.87409800  | 1.81767900  | -0.17255100 |
| H  | 2.38198600  | 0.75939800  | 1.19144100  |
| C  | 5.04871500  | -1.29442500 | -1.23501100 |
| C  | 6.07093800  | -2.06157900 | -0.64227500 |
| C  | 5.01375900  | -1.21678500 | -2.64352600 |
| C  | 7.01769100  | -2.72685300 | -1.41812400 |
| H  | 6.11085500  | -2.13475800 | 0.44169500  |
| C  | 5.96063200  | -1.88086200 | -3.41670800 |
| H  | 4.24264300  | -0.63089500 | -3.13360700 |

|   |            |             |             |
|---|------------|-------------|-------------|
| C | 6.96766000 | -2.63950400 | -2.81047300 |
| H | 7.79518900 | -3.31320400 | -0.93611200 |
| H | 5.91563100 | -1.80588400 | -4.49968100 |
| H | 7.70484400 | -3.15548800 | -3.41886700 |

**(Z)-3b**

|    |             |             |             |
|----|-------------|-------------|-------------|
| C  | 0.49354600  | 1.71192400  | -0.35891600 |
| H  | 0.84368700  | 2.59277400  | -0.89596300 |
| Br | -2.62568200 | -0.50767700 | -0.13813300 |
| C  | -0.78351600 | 1.74568700  | 0.06895300  |
| H  | -1.38447100 | 2.60953100  | -0.20503200 |
| C  | -1.45994200 | 0.74923800  | 0.93132700  |
| H  | -0.77658500 | 0.09360200  | 1.46554800  |
| H  | -2.16724600 | 1.20909700  | 1.61914300  |
| C  | 1.51249500  | 0.66507600  | -0.18152500 |
| C  | 1.20738800  | -0.70843200 | -0.12766500 |
| C  | 2.86424600  | 1.04984400  | -0.10344500 |
| C  | 2.21966700  | -1.65323000 | 0.03413300  |
| H  | 0.18217700  | -1.03965300 | -0.25467300 |
| C  | 3.87234200  | 0.10485400  | 0.06555800  |
| H  | 3.11870600  | 2.10480000  | -0.16626500 |
| C  | 3.55253900  | -1.25267200 | 0.13972300  |
| H  | 1.96480500  | -2.70856700 | 0.06545000  |
| H  | 4.90768200  | 0.42605100  | 0.13311100  |
| H  | 4.33750000  | -1.99267600 | 0.26447000  |

**L<sub>1</sub>-17<sub>9</sub>**

|    |             |             |             |
|----|-------------|-------------|-------------|
| Cu | -0.46621500 | 0.61427000  | 1.10011900  |
| N  | -2.57105000 | -0.83586200 | -0.52145000 |
| N  | 0.53586200  | 3.31338400  | 1.74267800  |
| N  | 1.83453200  | 1.75078000  | 2.53343100  |
| O  | -4.62622900 | -1.73492200 | -1.61635400 |
| O  | -4.31961200 | -2.13059600 | 0.63192000  |
| B  | -3.79881800 | -1.55357800 | -0.51600900 |
| C  | 0.72838700  | 1.97895700  | 1.79935400  |
| C  | 1.51561700  | 4.08221500  | 2.54404000  |
| H  | 1.99735700  | 4.85204000  | 1.93493800  |
| C  | 2.49169000  | 2.98811100  | 3.01083100  |
| H  | 3.48439000  | 3.08999700  | 2.56064600  |
| C  | 2.39840900  | 0.45684600  | 2.80499700  |
| C  | 3.43445600  | -0.03135100 | 1.98897600  |
| C  | 3.96133100  | -1.29451900 | 2.27984500  |

|   |             |             |             |    |             |             |             |
|---|-------------|-------------|-------------|----|-------------|-------------|-------------|
| H | 4.74668300  | -1.69168000 | 1.64158700  | C  | -6.48937600 | -2.91921500 | 1.34111900  |
| C | 3.49466000  | -2.06237100 | 3.35005800  | H  | -6.08215100 | -3.38928100 | 2.24118200  |
| C | 2.48640400  | -1.52954300 | 4.15947900  | H  | -7.38902100 | -3.47125400 | 1.04816700  |
| H | 2.11662700  | -2.10980300 | 5.00162200  | H  | -6.77409000 | -1.89663800 | 1.59550300  |
| C | 1.92286800  | -0.27684000 | 3.90690000  | C  | -4.91208100 | -4.37974000 | 0.04368300  |
| C | 0.81222500  | 0.25056800  | 4.78372100  | H  | -4.16324200 | -4.42116900 | -0.75200700 |
| H | 1.01819700  | 1.26337600  | 5.14770100  | H  | -5.71460300 | -5.08516600 | -0.19388000 |
| C | 3.97483800  | 0.76646300  | 0.82646100  | H  | -4.43083000 | -4.70025800 | 0.97149800  |
| H | 4.57191000  | 1.62268000  | 1.16586000  | C  | -1.10000800 | -2.13617800 | 0.99825600  |
| C | -0.55785200 | 3.97751100  | 1.09041800  | C  | -0.91469200 | -2.59569500 | 2.31795000  |
| C | -0.34693500 | 4.55766600  | -0.17483400 | H  | -1.29981800 | -1.99536500 | 3.14016300  |
| C | 0.97465800  | 4.42700000  | -0.89368800 | C  | -0.27313100 | -3.80124800 | 2.59181400  |
| H | 1.81242800  | 4.80510800  | -0.29765200 | H  | -0.16150700 | -4.12678300 | 3.62365700  |
| C | -1.40927200 | 5.24369200  | -0.77186000 | C  | 0.20282700  | -4.60477100 | 1.55065300  |
| H | -1.25535000 | 5.69724100  | -1.74826200 | H  | 0.68832700  | -5.55393300 | 1.76072300  |
| C | -2.65898300 | 5.35839800  | -0.15405600 | C  | 0.01962200  | -4.17388900 | 0.23501200  |
| C | -2.83034700 | 4.77438700  | 1.10433900  | H  | 0.36343600  | -4.79261700 | -0.59156000 |
| H | -3.79261900 | 4.85833200  | 1.60396200  | C  | -0.61904900 | -2.96148600 | -0.03737500 |
| C | -1.79729800 | 4.08434900  | 1.74733600  | H  | -0.75829800 | -2.65062500 | -1.06803500 |
| C | -2.02878600 | 3.45853300  | 3.10205500  | H  | 0.96022500  | 4.98904900  | -1.83085500 |
| H | -3.00168500 | 3.75434100  | 3.50232000  | H  | 1.20139400  | 3.38426900  | -1.13820100 |
| C | -1.78047400 | -0.81739000 | 0.74069300  | H  | -2.00801200 | 2.36474900  | 3.03736000  |
| H | -2.49385600 | -0.65972600 | 1.55974500  | H  | -1.26328000 | 3.75213400  | 3.82866800  |
| C | -2.12557700 | -0.17563700 | -1.69613800 | H  | 0.66896500  | -0.39536400 | 5.65358100  |
| C | -1.69873800 | 1.16378300  | -1.67202800 | H  | -0.13592900 | 0.29281800  | 4.23578700  |
| H | -1.72457700 | 1.71088400  | -0.73472200 | H  | 4.62255000  | 0.14669600  | 0.20316500  |
| C | -1.28071600 | 1.80408300  | -2.83934200 | H  | 3.17735600  | 1.15542000  | 0.18811300  |
| H | -0.96971400 | 2.84369900  | -2.79128900 | C  | -3.79919000 | 6.07085400  | -0.84179700 |
| C | -1.29064100 | 1.13042100  | -4.06356600 | H  | -4.34363500 | 5.38766800  | -1.50517600 |
| H | -0.97861700 | 1.63613800  | -4.97328700 | H  | -4.51864200 | 6.46700300  | -0.11928700 |
| C | -1.72663100 | -0.19608300 | -4.10122500 | H  | -3.43990100 | 6.90206900  | -1.45615800 |
| H | -1.74589300 | -0.73694900 | -5.04396100 | C  | 4.03027300  | -3.45092600 | 3.60280200  |
| C | -2.13383700 | -0.84283500 | -2.93450300 | H  | 5.01724900  | -3.59007300 | 3.15268900  |
| H | -2.47428600 | -1.87131700 | -2.97325000 | H  | 4.10929100  | -3.66389800 | 4.67373500  |
| C | -5.87914100 | -2.27027400 | -1.12516600 | H  | 3.35898800  | -4.20215300 | 3.16898500  |
| C | -6.44499100 | -3.22040400 | -2.17926700 | H  | 1.00872100  | 4.58156500  | 3.37771400  |
| H | -6.68226600 | -2.66013400 | -3.08854100 | H  | 2.61405300  | 2.95980300  | 4.09789500  |
| H | -7.36565900 | -3.69600800 | -1.82445900 | C  | 2.49062200  | -1.54868400 | -1.68634000 |
| H | -5.72775600 | -4.00010200 | -2.44180100 | H  | 1.89236300  | -1.98120500 | -0.88584000 |
| C | -6.83034000 | -1.08166100 | -0.92182700 | Br | 3.31492300  | 1.89757600  | -3.18050300 |
| H | -6.44387200 | -0.39282800 | -0.16517500 | C  | 1.90550700  | -0.54812900 | -2.37715200 |
| H | -7.83034700 | -1.40646200 | -0.61734600 | H  | 0.92316500  | -0.21971000 | -2.04808500 |
| H | -6.91706500 | -0.53356300 | -1.86422100 | C  | 2.41173500  | 0.11823500  | -3.59643800 |
| C | -5.44163400 | -2.95040600 | 0.22946000  | H  | 3.17584400  | -0.43880300 | -4.13349900 |

|   |            |             |             |
|---|------------|-------------|-------------|
| H | 1.60329000 | 0.42039700  | -4.25817000 |
| C | 3.80202000 | -2.18820900 | -1.87303700 |
| C | 4.92572200 | -1.53847300 | -2.42242700 |
| C | 3.95400200 | -3.52058100 | -1.43927300 |
| C | 6.13851000 | -2.21281400 | -2.56457600 |
| H | 4.86393700 | -0.49167400 | -2.69980200 |
| C | 5.16397600 | -4.19349000 | -1.58935400 |
| H | 3.10468400 | -4.02420100 | -0.98506100 |
| C | 6.26162700 | -3.54320300 | -2.15911700 |
| H | 6.99373400 | -1.69146700 | -2.98566100 |
| H | 5.25322200 | -5.22400600 | -1.25691200 |
| H | 7.20786400 | -4.06444700 | -2.27297900 |

**L<sub>1</sub>-TS18<sub>9</sub>**

|    |             |             |             |
|----|-------------|-------------|-------------|
| Cu | 0.99151100  | -0.07766700 | 0.31174100  |
| N  | -1.71160700 | -1.02740800 | -0.93506000 |
| N  | 2.95209400  | 1.75418200  | -1.33598700 |
| N  | 1.19227600  | 2.88455000  | -0.75410200 |
| O  | -3.82299500 | -1.50792500 | -2.14660300 |
| O  | -3.76326200 | 0.36004600  | -0.80235200 |
| B  | -3.06597100 | -0.73445000 | -1.28115300 |
| C  | 1.76484500  | 1.66110300  | -0.68562600 |
| C  | 3.23492100  | 3.09372300  | -1.90215200 |
| H  | 4.15993500  | 3.49829900  | -1.48059900 |
| C  | 1.99467700  | 3.88970000  | -1.49353400 |
| H  | 2.22756500  | 4.73949400  | -0.84645400 |
| C  | -0.09818200 | 3.31180900  | -0.28349300 |
| C  | -0.19177700 | 4.05177800  | 0.91191700  |
| C  | -1.45442000 | 4.51715000  | 1.29658900  |
| H  | -1.53980600 | 5.07683800  | 2.22500100  |
| C  | -2.59836500 | 4.29367200  | 0.52622900  |
| C  | -2.45755100 | 3.60353800  | -0.68039200 |
| H  | -3.33017400 | 3.43492600  | -1.30412000 |
| C  | -1.22129700 | 3.11218200  | -1.10889200 |
| C  | -1.11579100 | 2.38679100  | -2.43060100 |
| H  | -0.28812100 | 2.76248000  | -3.04201500 |
| C  | 1.01629100  | 4.37286100  | 1.75689700  |
| H  | 1.69034100  | 5.07364600  | 1.24738700  |
| C  | 3.93309900  | 0.72673200  | -1.53576800 |
| C  | 5.00463300  | 0.61341000  | -0.62519400 |
| C  | 5.14133900  | 1.54572400  | 0.55455700  |
| H  | 5.32152200  | 2.57684200  | 0.22625900  |
| C  | 5.96199700  | -0.37909000 | -0.85665600 |

|   |             |             |             |
|---|-------------|-------------|-------------|
| H | 6.78637900  | -0.48156000 | -0.15462500 |
| C | 5.89590800  | -1.23574300 | -1.96184400 |
| C | 4.85634300  | -1.05230600 | -2.87667500 |
| H | 4.81023800  | -1.67970700 | -3.76414200 |
| C | 3.87802600  | -0.06643300 | -2.69638400 |
| C | 2.84858400  | 0.17107300  | -3.77717800 |
| H | 2.63732700  | -0.74621900 | -4.33235700 |
| C | -1.08807600 | -0.25550400 | 0.16177300  |
| H | -1.11307300 | 0.80821200  | -0.08040200 |
| C | -1.05663800 | -2.09938500 | -1.61451600 |
| C | 0.13480300  | -1.88576900 | -2.32205400 |
| H | 0.56465200  | -0.89050800 | -2.32937300 |
| C | 0.76909200  | -2.93502200 | -2.98866000 |
| H | 1.70146100  | -2.75178800 | -3.51494100 |
| C | 0.20885400  | -4.21410500 | -2.98790200 |
| H | 0.69921300  | -5.02919400 | -3.51207300 |
| C | -0.99296200 | -4.42979900 | -2.31136500 |
| H | -1.44631800 | -5.41736700 | -2.30737700 |
| C | -1.61667900 | -3.38579800 | -1.62645500 |
| H | -2.55106500 | -3.55900600 | -1.10508400 |
| C | -5.04902200 | -0.78253200 | -2.41306500 |
| C | -6.18353200 | -1.79382800 | -2.56905700 |
| H | -5.99958600 | -2.41864000 | -3.44793900 |
| H | -7.14404400 | -1.28652700 | -2.70922300 |
| H | -6.25871300 | -2.44909400 | -1.69958900 |
| C | -4.84339500 | -0.01701600 | -3.72796200 |
| H | -4.03809000 | 0.71742700  | -3.63632500 |
| H | -5.75323000 | 0.50219000  | -4.04469900 |
| H | -4.56293700 | -0.72866600 | -4.50940600 |
| C | -5.15725900 | 0.15991000  | -1.15247400 |
| C | -5.80017500 | 1.52023000  | -1.41504200 |
| H | -5.79015600 | 2.11384700  | -0.49643200 |
| H | -6.84279600 | 1.40326900  | -1.72950300 |
| H | -5.26781800 | 2.07948000  | -2.18679400 |
| C | -5.83229800 | -0.51260900 | 0.05128200  |
| H | -5.39325900 | -1.49247900 | 0.25590500  |
| H | -6.90857200 | -0.63611100 | -0.10411000 |
| H | -5.67654000 | 0.10939700  | 0.93646400  |
| C | -1.71677400 | -0.46130100 | 1.48687200  |
| C | -1.62626200 | 0.55974000  | 2.45947600  |
| H | -1.06493000 | 1.46018100  | 2.23224500  |
| C | -2.25400700 | 0.43370700  | 3.69437600  |
| H | -2.17093100 | 1.23815500  | 4.42024400  |
| C | -2.99349000 | -0.71328300 | 3.99966300  |

|    |             |             |             |    |             |                         |
|----|-------------|-------------|-------------|----|-------------|-------------------------|
| H  | -3.49089100 | -0.80675900 | 4.96116500  |    |             |                         |
| C  | -3.08382500 | -1.73752700 | 3.05476600  | Cu | 0.97373300  | 0.31982000 0.55723700   |
| H  | -3.64637300 | -2.63925500 | 3.28188700  | N  | -1.42859800 | -1.47985800 -0.46550600 |
| C  | -2.45040100 | -1.61717800 | 1.81951500  | N  | 2.45021300  | 1.54223700 -1.92972900  |
| H  | -2.52923400 | -2.42123400 | 1.09701800  | N  | 0.74573100  | 2.79794600 -1.42999600  |
| H  | 5.99418300  | 1.25528400  | 1.17449300  | O  | -3.31058500 | -2.54963500 -1.66880900 |
| H  | 4.24761900  | 1.55510100  | 1.18778200  | O  | -3.59697800 | -0.37749100 -0.95866500 |
| H  | 1.90800000  | 0.55565900  | -3.38024800 | B  | -2.74639300 | -1.46693800 -1.01697100 |
| H  | 3.21871400  | 0.90498200  | -4.50516700 | C  | 1.33280400  | 1.60770400 -1.16659500  |
| H  | -2.03679700 | 2.50962400  | -3.00570400 | C  | 2.70832400  | 2.76650500 -2.72469300  |
| H  | -0.95599700 | 1.31260000  | -2.29166100 | H  | 3.63452600  | 3.24409200 -2.39057200  |
| H  | 0.70895700  | 4.84763700  | 2.69226400  | C  | 1.46921600  | 3.61726900 -2.43115600  |
| H  | 1.58722600  | 3.47442300  | 2.00870100  | H  | 1.71962200  | 4.59647100 -2.01559900  |
| C  | 6.91944900  | -2.32937800 | -2.15445800 | C  | -0.55348400 | 3.24370400 -1.00711900  |
| H  | 6.64541100  | -3.22775200 | -1.58765800 | C  | -0.67363000 | 4.28930900 -0.07054500  |
| H  | 7.00392300  | -2.61963400 | -3.20570500 | C  | -1.96134600 | 4.71011800 0.28283300   |
| H  | 7.90887800  | -2.01701300 | -1.80655900 | H  | -2.06188200 | 5.50490400 1.01845400   |
| C  | -3.95314200 | 4.77000400  | 0.99276600  | C  | -3.11075300 | 4.15062700 -0.27985100  |
| H  | -3.86916600 | 5.64640200  | 1.64243000  | C  | -2.95239600 | 3.16250500 -1.25556600  |
| H  | -4.59959700 | 5.03132500  | 0.14924500  | H  | -3.83006300 | 2.73631300 -1.73235100  |
| H  | -4.46401000 | 3.98637300  | 1.56589500  | C  | -1.69016200 | 2.70585100 -1.64379700  |
| H  | 3.36093000  | 3.02442800  | -2.98781500 | C  | -1.56467800 | 1.68248900 -2.74900200  |
| H  | 1.42307400  | 4.26398900  | -2.34929800 | H  | -0.82716200 | 1.98798100 -3.49871000  |
| C  | 1.33319800  | -2.16456500 | 0.80649200  | C  | 0.52708000  | 4.98962800 0.51599400   |
| H  | 1.07600900  | -2.62002900 | -0.14337300 | H  | 0.92932300  | 5.73305800 -0.18565400  |
| Br | 2.15223600  | 1.08049500  | 2.89841800  | C  | 3.32836900  | 0.42055900 -2.11645500  |
| C  | 2.64812800  | -1.59770900 | 0.83334700  | C  | 4.56254300  | 0.36876500 -1.43854800  |
| H  | 3.12430700  | -1.43025500 | -0.12920300 | C  | 4.99166300  | 1.45064500 -0.47938400  |
| C  | 3.35298200  | -1.24104300 | 1.96288800  | H  | 5.29233900  | 2.35749800 -1.02057500  |
| H  | 3.05420600  | -1.56414800 | 2.94911600  | C  | 5.41507500  | -0.70988500 -1.70325400 |
| H  | 4.34202300  | -0.81174000 | 1.87303100  | H  | 6.36670800  | -0.75881500 -1.17868300 |
| C  | 0.65228200  | -2.79445300 | 1.94927400  | C  | 5.09056000  | -1.71167700 -2.62246600 |
| C  | 0.62080000  | -2.26597500 | 3.25596800  | C  | 3.87955000  | -1.60343800 -3.31343000 |
| C  | 0.04216000  | -4.04623800 | 1.72294300  | H  | 3.62288900  | -2.35069100 -4.06102300 |
| C  | 0.04542900  | -2.99177800 | 4.29670300  | C  | 2.99369800  | -0.54350900 -3.08918100 |
| H  | 1.01052100  | -1.27125400 | 3.44562400  | C  | 1.74060900  | -0.42393400 -3.92672700 |
| C  | -0.52317800 | -4.77119600 | 2.76884200  | H  | 1.57395300  | -1.33694600 -4.50350200 |
| H  | 0.03525100  | -4.45568400 | 0.71655900  | C  | -1.00724000 | -0.33651700 0.35591300  |
| C  | -0.51713800 | -4.24866500 | 4.06416600  | H  | -1.16755100 | 0.58888100 -0.19744500  |
| H  | 0.02739200  | -2.56410600 | 5.29488200  | C  | -0.64745200 | -2.67313100 -0.62277100 |
| H  | -0.96954400 | -5.74239800 | 2.57261700  | C  | 0.59745000  | -2.63603200 -1.26224300 |
| H  | -0.95823300 | -4.81099300 | 4.88266200  | H  | 0.98483300  | -1.68335900 -1.60160500 |
|    |             |             |             | C  | 1.34465100  | -3.80093000 -1.43747100 |
|    |             |             |             | H  | 2.31269000  | -3.74127500 -1.92626900 |

L<sub>1</sub>-19,

|   |             |             |             |                                       |             |             |             |
|---|-------------|-------------|-------------|---------------------------------------|-------------|-------------|-------------|
| C | 0.85053200  | -5.02954100 | -0.99587500 | H                                     | 5.84911000  | -3.67357000 | -2.11995400 |
| H | 1.43059600  | -5.93707400 | -1.13550300 | H                                     | 5.87100200  | -3.31697200 | -3.84892300 |
| C | -0.39845300 | -5.07930100 | -0.37541000 | H                                     | 7.06838500  | -2.57920800 | -2.77142200 |
| H | -0.79929100 | -6.02856900 | -0.03082500 | C                                     | -4.48626000 | 4.59345400  | 0.15882800  |
| C | -1.14027400 | -3.91236300 | -0.18748600 | H                                     | -4.47451900 | 5.61723200  | 0.54450600  |
| H | -2.11743100 | -3.96063300 | 0.28012200  | H                                     | -5.20452100 | 4.54891800  | -0.66595000 |
| C | -4.55689900 | -2.09844000 | -2.25544100 | H                                     | -4.86819200 | 3.94711700  | 0.95878000  |
| C | -5.56135400 | -3.24800900 | -2.19502300 | H                                     | 2.81745800  | 2.51564900  | -3.78447400 |
| H | -5.20790300 | -4.07593000 | -2.81643200 | H                                     | 0.83701400  | 3.77298300  | -3.31290400 |
| H | -6.53985200 | -2.93411900 | -2.57377700 | C                                     | 1.47305900  | -1.42368800 | 1.71650100  |
| H | -5.68446700 | -3.62063300 | -1.17664400 | H                                     | 0.85781300  | -2.14049700 | 1.18613300  |
| C | -4.26219300 | -1.73401300 | -3.71727400 | Br                                    | 2.16264300  | 2.05352600  | 1.89894600  |
| H | -3.54597900 | -0.91015400 | -3.78296700 | C                                     | 2.84388300  | -1.43250400 | 1.18769300  |
| H | -5.17060600 | -1.44911100 | -4.25693000 | H                                     | 2.91527700  | -1.60078300 | 0.11459200  |
| H | -3.82356500 | -2.60287800 | -4.21560600 | C                                     | 3.99735200  | -1.33321900 | 1.87579900  |
| C | -4.91145900 | -0.84886900 | -1.35945700 | H                                     | 4.02434500  | -1.20194600 | 2.95134400  |
| C | -5.64216100 | 0.27900100  | -2.08473300 | H                                     | 4.94947000  | -1.39549300 | 1.35897400  |
| H | -5.81352300 | 1.10980000  | -1.39427600 | C                                     | 1.19881300  | -1.46588400 | 3.16727800  |
| H | -6.61684500 | -0.06173900 | -2.44977700 | C                                     | 1.76331600  | -0.58731100 | 4.11570900  |
| H | -5.06702400 | 0.65316600  | -2.93363600 | C                                     | 0.38604500  | -2.51554200 | 3.64605600  |
| C | -5.66644000 | -1.22071500 | -0.07564000 | C                                     | 1.53096100  | -0.76549800 | 5.47677900  |
| H | -5.16361000 | -2.03044700 | 0.45979200  | H                                     | 2.34692700  | 0.25651200  | 3.77002500  |
| H | -6.69540900 | -1.52811100 | -0.28615300 | C                                     | 0.16476200  | -2.69811600 | 5.00913700  |
| H | -5.69129100 | -0.35046100 | 0.58533200  | H                                     | -0.04684300 | -3.21146300 | 2.93369900  |
| C | -1.65150500 | -0.22463500 | 1.68699300  | C                                     | 0.73555300  | -1.82101400 | 5.93205300  |
| C | -1.65760000 | 1.02805500  | 2.34084200  | H                                     | 1.96978200  | -0.07063100 | 6.18768800  |
| H | -1.15216600 | 1.87167900  | 1.88069300  | H                                     | -0.45551800 | -3.52292900 | 5.34926700  |
| C | -2.29918400 | 1.19643700  | 3.56205700  | H                                     | 0.56089200  | -1.95572200 | 6.99612400  |
| H | -2.28768100 | 2.17103800  | 4.04211700  |                                       |             |             |             |
| C | -2.96323700 | 0.12360400  | 4.16721400  | <b>L<sub>1</sub>-TS20<sub>9</sub></b> |             |             |             |
| H | -3.47126900 | 0.25825000  | 5.11791200  | Cu                                    | -0.76653300 | 0.18431400  | -0.50520900 |
| C | -2.96785700 | -1.11942500 | 3.53538600  | N                                     | 2.30945700  | -1.20173800 | -0.19680800 |
| H | -3.47909500 | -1.96122500 | 3.99517300  | N                                     | -2.76213800 | 1.48891000  | 1.40112300  |
| C | -2.31259900 | -1.29548200 | 2.31664500  | N                                     | -1.16941300 | 2.90973300  | 0.99069900  |
| H | -2.33039600 | -2.26580500 | 1.83408100  | O                                     | 3.64619400  | -2.32106300 | 1.54522000  |
| H | 5.85684500  | 1.12419500  | 0.10338100  | O                                     | 2.20203400  | -0.66481100 | 2.23356100  |
| H | 4.19337300  | 1.72519400  | 0.21591200  | B                                     | 2.70475300  | -1.39149000 | 1.17173400  |
| H | 0.84989100  | -0.23971600 | -3.32234300 | C                                     | -1.53970500 | 1.61557300  | 0.83105000  |
| H | 1.82053700  | 0.40556300  | -4.64090500 | C                                     | -3.25693400 | 2.72554800  | 2.04842900  |
| H | -2.52388200 | 1.55103900  | -3.25435100 | H                                     | -4.25828700 | 2.97664300  | 1.69087400  |
| H | -1.25601000 | 0.70300700  | -2.37180700 | C                                     | -2.20268900 | 3.75414600  | 1.63731400  |
| H | 0.24803100  | 5.52831300  | 1.42549000  | H                                     | -2.59079400 | 4.48913200  | 0.92504600  |
| H | 1.31958600  | 4.28347600  | 0.77159600  | C                                     | 0.09674700  | 3.52201000  | 0.70394100  |
| C | 6.01952300  | -2.87930300 | -2.85733600 |                                       |             |             |             |

|   |             |             |             |    |             |             |             |
|---|-------------|-------------|-------------|----|-------------|-------------|-------------|
| C | 0.23361200  | 4.37613900  | -0.40790600 | H  | 3.08067500  | -4.47417200 | 2.88652100  |
| C | 1.44847200  | 5.05415200  | -0.57027900 | C  | 3.03515400  | -0.98570400 | 3.39128200  |
| H | 1.56038300  | 5.71557600  | -1.42637600 | C  | 2.15621200  | -0.97990700 | 4.63908500  |
| C | 2.51160900  | 4.91087600  | 0.32526600  | H  | 1.78476100  | 0.03100900  | 4.82850700  |
| C | 2.33470800  | 4.06992200  | 1.42899600  | H  | 2.72938200  | -1.29756200 | 5.51632200  |
| H | 3.13855400  | 3.96684100  | 2.15483300  | H  | 1.29602900  | -1.64190100 | 4.52660800  |
| C | 1.13628500  | 3.38185400  | 1.64555700  | C  | 4.10811200  | 0.10630600  | 3.48510300  |
| C | 0.96211700  | 2.53639800  | 2.88468500  | H  | 4.75083300  | 0.10841400  | 2.60033100  |
| H | 1.77073800  | 2.73278200  | 3.59465800  | H  | 4.73754300  | -0.02507000 | 4.37006200  |
| C | -0.88176000 | 4.57941000  | -1.40183100 | H  | 3.62097100  | 1.08199500  | 3.55247300  |
| H | -1.68568000 | 5.19718700  | -0.98115400 | C  | 1.62099100  | 0.51708400  | -1.88171800 |
| C | -3.52176100 | 0.28778000  | 1.60567000  | C  | 1.37241400  | -0.06227500 | -3.13591300 |
| C | -4.68864300 | 0.07020000  | 0.84586600  | H  | 0.90747500  | -1.03624900 | -3.20081200 |
| C | -5.10249500 | 1.00655300  | -0.26242700 | C  | 1.68345500  | 0.61979400  | -4.30818100 |
| H | -5.43971100 | 1.97514100  | 0.12846000  | H  | 1.46934400  | 0.15752700  | -5.26713800 |
| C | -5.46663600 | -1.05565800 | 1.14204800  | C  | 2.24803300  | 1.89572900  | -4.25498100 |
| H | -6.36625400 | -1.23290400 | 0.55689000  | H  | 2.48526700  | 2.42727000  | -5.17229700 |
| C | -5.12659400 | -1.94960900 | 2.16125100  | C  | 2.48995000  | 2.48854300  | -3.01599500 |
| C | -3.97458700 | -1.68960600 | 2.90927600  | H  | 2.91629700  | 3.48588800  | -2.95810800 |
| H | -3.70167700 | -2.36389800 | 3.71790700  | C  | 2.17445400  | 1.80762500  | -1.84007000 |
| C | -3.16401400 | -0.57924100 | 2.65566600  | H  | 2.36683100  | 2.27721600  | -0.88083400 |
| C | -1.93838200 | -0.32768400 | 3.49984800  | H  | -5.93572100 | 0.58083100  | -0.82765700 |
| H | -1.91623900 | 0.69409300  | 3.89399000  | H  | -4.27421000 | 1.19450700  | -0.95493000 |
| C | 1.38735100  | -0.17603600 | -0.57329700 | H  | -1.90969300 | -1.01425400 | 4.35058800  |
| H | 1.33582200  | 0.53135900  | 0.25481400  | H  | -1.02180200 | -0.46681600 | 2.91860300  |
| C | 3.00737900  | -2.01862100 | -1.16873800 | H  | 0.97068400  | 1.46765600  | 2.65155200  |
| C | 2.72942200  | -3.38701700 | -1.26916100 | H  | 0.01505300  | 2.75152600  | 3.39061800  |
| H | 1.96123800  | -3.82439500 | -0.63993400 | H  | -0.50955200 | 5.09759100  | -2.28943500 |
| C | 3.44374500  | -4.18421100 | -2.16522200 | H  | -1.31908700 | 3.62622300  | -1.71840600 |
| H | 3.21750500  | -5.24418900 | -2.23585900 | C  | -5.96823900 | -3.17410700 | 2.43310100  |
| C | 4.44395900  | -3.62455300 | -2.96093300 | H  | -5.62336500 | -4.02872100 | 1.83768200  |
| H | 4.99785800  | -4.24534900 | -3.65914200 | H  | -5.91752600 | -3.46999800 | 3.48547500  |
| C | 4.73451500  | -2.26350600 | -2.84868200 | H  | -7.01848300 | -3.00370800 | 2.17776700  |
| H | 5.51863400  | -1.82067700 | -3.45585200 | C  | 3.81972900  | 5.63367800  | 0.10290400  |
| C | 4.02574500  | -1.46345700 | -1.95295700 | H  | 3.66914400  | 6.58026000  | -0.42470300 |
| H | 4.25507100  | -0.40801300 | -1.86020200 | H  | 4.32449400  | 5.84869800  | 1.04981800  |
| C | 3.62428800  | -2.39543100 | 2.99589600  | H  | 4.50845200  | 5.03032200  | -0.50181800 |
| C | 5.04536200  | -2.66398100 | 3.48642100  | H  | -3.31240000 | 2.58031100  | 3.13451200  |
| H | 5.37222000  | -3.64763500 | 3.13791600  | H  | -1.77347700 | 4.29524700  | 2.48628000  |
| H | 5.08669000  | -2.66156300 | 4.58065800  | C  | -0.35236700 | -1.82570800 | -0.79722400 |
| H | 5.75058200  | -1.92250200 | 3.10745800  | H  | 0.58282800  | -2.12822500 | -1.23970300 |
| C | 2.70646400  | -3.56759800 | 3.36949800  | Br | -2.02368600 | 1.16075000  | -2.44675300 |
| H | 1.68250200  | -3.40184500 | 3.02320200  | C  | -0.43713700 | -2.30062100 | 0.61551400  |
| H | 2.68636600  | -3.73707300 | 4.45015300  | H  | 0.30642100  | -1.88604400 | 1.28929800  |

|                                      |             |             |             |   |             |             |             |
|--------------------------------------|-------------|-------------|-------------|---|-------------|-------------|-------------|
| C                                    | -1.29238800 | -3.19653700 | 1.13232800  | H | 0.24025500  | 4.83825400  | -1.10114100 |
| H                                    | -2.06245500 | -3.68090100 | 0.54306600  | C | -2.95572500 | 4.23738000  | -1.63782100 |
| H                                    | -1.23730300 | -3.46625300 | 2.18307100  | H | -2.88886400 | 4.47951700  | -2.69536500 |
| C                                    | -1.43612500 | -2.27996900 | -1.73201300 | C | -4.21512900 | 4.11045100  | -1.04338500 |
| C                                    | -1.07227200 | -2.90701300 | -2.93755900 | C | -4.27814400 | 3.78897100  | 0.31503700  |
| C                                    | -2.80889700 | -2.16593500 | -1.44437100 | H | -5.24922000 | 3.68635300  | 0.79377000  |
| C                                    | -2.03264200 | -3.39297300 | -3.82369900 | C | -3.12513000 | 3.57966100  | 1.07811600  |
| H                                    | -0.01858700 | -3.03674700 | -3.17330100 | C | -3.23212100 | 3.19841100  | 2.53540000  |
| C                                    | -3.76925600 | -2.65639700 | -2.32384100 | H | -2.67598800 | 3.88342200  | 3.18579200  |
| H                                    | -3.12552400 | -1.68453200 | -0.52741000 | C | -1.23681800 | -1.23300000 | 0.43963400  |
| C                                    | -3.38871700 | -3.26762900 | -3.52127400 | H | -1.50811000 | -1.52587100 | 1.46019300  |
| H                                    | -1.72018100 | -3.87333400 | -4.74703500 | C | -2.69432300 | -0.55413300 | -1.49721200 |
| H                                    | -4.82209000 | -2.54997000 | -2.07716500 | C | -1.60835700 | 0.04271700  | -2.16761700 |
| H                                    | -4.14125900 | -3.64199200 | -4.20968300 | H | -0.59852600 | -0.13104600 | -1.81749200 |
| <b>L<sub>1</sub>-17<sub>10</sub></b> |             |             |             | C | -1.80615300 | 0.83529700  | -3.29910800 |
| Cu                                   | -0.62633300 | 0.61349300  | 0.79365400  | H | -0.93689500 | 1.26174700  | -3.79261600 |
| N                                    | -2.48667500 | -1.37042700 | -0.35971700 | C | -3.08790900 | 1.05934300  | -3.80004700 |
| N                                    | -0.67836400 | 3.52464600  | 1.21626700  | H | -3.23937700 | 1.66507300  | -4.68916400 |
| N                                    | 1.02794900  | 2.58815700  | 2.19931800  | C | -4.17302700 | 0.47872200  | -3.13838600 |
| O                                    | -4.54996200 | -2.78677300 | -0.59385500 | H | -5.18389600 | 0.63768900  | -3.50736000 |
| O                                    | -3.17257100 | -3.13494900 | 1.21276000  | C | -3.98716900 | -0.30741200 | -2.00338400 |
| B                                    | -3.38791700 | -2.39410900 | 0.05796800  | H | -4.84365100 | -0.74817900 | -1.51166100 |
| C                                    | -0.04779200 | 2.35319400  | 1.41977600  | C | -5.25682400 | -3.69848800 | 0.28236000  |
| C                                    | -0.02131300 | 4.67266200  | 1.88141000  | C | -5.96290700 | -4.74434400 | -0.57874500 |
| H                                    | 0.30473500  | 5.40787100  | 1.13845900  | H | -6.72661400 | -4.25936400 | -1.19395200 |
| C                                    | 1.15620900  | 4.00379400  | 2.61437400  | H | -6.45778600 | -5.49645700 | 0.04513100  |
| H                                    | 2.12741600  | 4.40817300  | 2.31396500  | H | -5.26367400 | -5.24922600 | -1.24717100 |
| C                                    | 1.92586300  | 1.58742600  | 2.70515900  | C | -6.28985600 | -2.86879200 | 1.05896300  |
| C                                    | 3.16395900  | 1.38900300  | 2.06866600  | H | -5.80070800 | -2.11537900 | 1.68286600  |
| C                                    | 4.04040200  | 0.44015400  | 2.60676100  | H | -6.91869000 | -3.49519700 | 1.69919300  |
| H                                    | 4.99558200  | 0.27425400  | 2.11458800  | H | -6.93660000 | -2.35066800 | 0.34505100  |
| C                                    | 3.71645000  | -0.30380000 | 3.74485900  | C | -4.09460600 | -4.24875100 | 1.19361100  |
| C                                    | 2.47807100  | -0.07778400 | 4.35492300  | C | -4.49305500 | -4.57372200 | 2.63262300  |
| H                                    | 2.21043700  | -0.64362300 | 5.24452900  | H | -3.61474700 | -4.91927300 | 3.18573600  |
| C                                    | 1.56909700  | 0.85981500  | 3.85629100  | H | -5.24515900 | -5.36946900 | 2.66101900  |
| C                                    | 0.23394300  | 1.05958500  | 4.53293500  | H | -4.89096200 | -3.69737900 | 3.14772400  |
| H                                    | 0.03547200  | 2.11428400  | 4.75253400  | C | -3.35247500 | -5.44029500 | 0.57062900  |
| C                                    | 3.54568700  | 2.16005400  | 0.82820300  | H | -3.06091800 | -5.22760600 | -0.46153800 |
| H                                    | 3.62600300  | 3.23648900  | 1.02193400  | H | -3.96054100 | -6.35031600 | 0.58195900  |
| C                                    | -1.87722400 | 3.70475400  | 0.44385800  | H | -2.43994100 | -5.62583700 | 1.14356100  |
| C                                    | -1.77513300 | 4.03701700  | -0.91889900 | C | -0.13236400 | -2.16219900 | 0.02004800  |
| C                                    | -0.43519700 | 4.13862000  | -1.60622700 | C | 0.94214500  | -2.40846100 | 0.90264600  |
|                                      |             |             |             | H | 0.95147600  | -1.90977900 | 1.86991100  |
|                                      |             |             |             | C | 1.97540800  | -3.27992100 | 0.57251800  |



|    |             |             |             |
|----|-------------|-------------|-------------|
| H  | 2.77402500  | -3.45939600 | 1.28933300  |
| C  | 1.98515400  | -3.93824400 | -0.66429800 |
| H  | 2.78635000  | -4.62614900 | -0.91979100 |
| C  | 0.93423100  | -3.70666100 | -1.55253100 |
| H  | 0.91355500  | -4.21636400 | -2.51323300 |
| C  | -0.10823600 | -2.83633500 | -1.21662400 |
| H  | -0.92591500 | -2.69014800 | -1.91478100 |
| H  | -0.55746200 | 4.48240300  | -2.63630700 |
| H  | 0.06828900  | 3.16667700  | -1.63588400 |
| H  | -4.27555800 | 3.20634600  | 2.86025200  |
| H  | -2.83237900 | 2.19320400  | 2.70948800  |
| H  | 0.19261600  | 0.50734800  | 5.47514000  |
| H  | -0.58533100 | 0.70495900  | 3.89715000  |
| H  | 4.51435900  | 1.82456500  | 0.44971600  |
| H  | 2.81060800  | 2.03147900  | 0.02763900  |
| C  | -5.47105400 | 4.27286500  | -1.86465200 |
| H  | -6.34731400 | 4.44247000  | -1.23242000 |
| H  | -5.38871100 | 5.10973300  | -2.56582700 |
| H  | -5.65657300 | 3.36867500  | -2.45672100 |
| C  | 4.66639700  | -1.34380800 | 4.29097700  |
| H  | 5.69663600  | -1.14706100 | 3.98069400  |
| H  | 4.64142200  | -1.37493500 | 5.38482600  |
| H  | 4.40035500  | -2.34688100 | 3.93450700  |
| H  | -0.72032000 | 5.16965100  | 2.56169400  |
| H  | 1.07968800  | 4.08618900  | 3.70421000  |
| Br | 2.20171400  | 1.25761900  | -2.87820200 |
| C  | 5.15745000  | -1.34035500 | -3.34151100 |
| H  | 5.69925200  | -1.57251500 | -4.25809300 |
| C  | 3.86055300  | -1.00972300 | -3.47932700 |
| H  | 3.43483100  | -1.03208000 | -4.47997900 |
| C  | 2.92988300  | -0.56798200 | -2.41045200 |
| H  | 3.39375200  | -0.43463100 | -1.43787300 |
| H  | 2.03481200  | -1.18303900 | -2.32118600 |
| C  | 5.96967900  | -1.41150600 | -2.11245300 |
| C  | 5.47609700  | -1.92062600 | -0.89736600 |
| C  | 7.31340100  | -0.99462700 | -2.16167100 |
| C  | 6.29154000  | -1.97468500 | 0.23427800  |
| H  | 4.46624200  | -2.31536300 | -0.84623000 |
| C  | 8.12345300  | -1.04237500 | -1.02987700 |
| H  | 7.71648400  | -0.61848700 | -3.09857800 |
| C  | 7.61350000  | -1.52975600 | 0.17651700  |
| H  | 5.89386300  | -2.38340500 | 1.15901700  |
| H  | 9.15467700  | -0.70581300 | -1.08961000 |
| H  | 8.24723300  | -1.57880500 | 1.05747600  |

**L<sub>1</sub>-TS18<sub>10</sub>**

|    |             |             |             |
|----|-------------|-------------|-------------|
| Cu | -0.31022300 | -0.48634500 | 0.04023800  |
| N  | 2.18664000  | 0.97334700  | -0.79602800 |
| N  | 0.70302800  | -2.85772200 | 1.64884100  |
| N  | -0.89791500 | -1.82895900 | 2.70245200  |
| O  | 4.54621800  | 1.82681000  | -0.93279300 |
| O  | 3.37734600  | 2.12814300  | 1.02275900  |
| B  | 3.34877100  | 1.61471000  | -0.26747600 |
| C  | -0.14184400 | -1.81120000 | 1.58087600  |
| C  | 0.53730600  | -3.68406200 | 2.86772300  |
| H  | 0.23827800  | -4.70262300 | 2.59965100  |
| C  | -0.55679100 | -2.92654200 | 3.63751600  |
| H  | -1.43531100 | -3.54517700 | 3.84495000  |
| C  | -1.89124600 | -0.85744800 | 3.05952100  |
| C  | -3.24746200 | -1.12642500 | 2.79945300  |
| C  | -4.19713500 | -0.17503300 | 3.19339200  |
| H  | -5.24812400 | -0.37669400 | 2.99837700  |
| C  | -3.83621500 | 1.01467400  | 3.83186100  |
| C  | -2.48011400 | 1.23945900  | 4.09434900  |
| H  | -2.18029300 | 2.15020400  | 4.60798900  |
| C  | -1.49457100 | 0.31819900  | 3.72709000  |
| C  | -0.04382100 | 0.58179500  | 4.05569300  |
| H  | 0.36609900  | -0.18849800 | 4.71950800  |
| C  | -3.68192400 | -2.39512300 | 2.10603600  |
| H  | -3.36054300 | -3.28975600 | 2.65144800  |
| C  | 1.71554900  | -3.19834600 | 0.68747500  |
| C  | 1.42599900  | -4.13516500 | -0.32231500 |
| C  | 0.05330900  | -4.74491700 | -0.46709800 |
| H  | -0.27216600 | -5.25222200 | 0.44877200  |
| C  | 2.44760600  | -4.47980700 | -1.21183700 |
| H  | 2.23121400  | -5.19428200 | -2.00260200 |
| C  | 3.72899500  | -3.92831100 | -1.12002700 |
| C  | 3.98697300  | -3.02099500 | -0.08931000 |
| H  | 4.98153500  | -2.59116400 | 0.00597900  |
| C  | 2.99901400  | -2.64073300 | 0.82409200  |
| C  | 3.31682300  | -1.63632000 | 1.90642200  |
| H  | 2.87918600  | -1.90990900 | 2.87155000  |
| C  | 0.94305800  | 1.18105500  | -0.01418600 |
| H  | 1.22345200  | 1.13481700  | 1.03957100  |
| C  | 2.16099100  | 0.31683000  | -2.05415800 |
| C  | 0.96091100  | 0.16251800  | -2.77009500 |
| H  | 0.03878600  | 0.55467100  | -2.36208100 |

|   |             |             |             |                                      |             |             |             |
|---|-------------|-------------|-------------|--------------------------------------|-------------|-------------|-------------|
| C | 0.93626400  | -0.49484800 | -4.00142100 | H                                    | -3.26090100 | -2.45682900 | 1.09662800  |
| H | -0.01382400 | -0.60565700 | -4.51658100 | C                                    | 4.79348600  | -4.27764100 | -2.13155000 |
| C | 2.10576100  | -1.00060900 | -4.56461200 | H                                    | 5.79904400  | -4.15594600 | -1.71760200 |
| H | 2.08601300  | -1.50390800 | -5.52692700 | H                                    | 4.69144200  | -5.30857500 | -2.48453300 |
| C | 3.30485200  | -0.84647900 | -3.86400800 | H                                    | 4.71541300  | -3.62211900 | -3.00744100 |
| H | 4.23264900  | -1.23015800 | -4.28218600 | C                                    | -4.87714000 | 2.03864900  | 4.21932100  |
| C | 3.33666100  | -0.21114000 | -2.62531700 | H                                    | -5.87561400 | 1.59512100  | 4.27041200  |
| H | 4.27686600  | -0.11111400 | -2.10071500 | H                                    | -4.65483400 | 2.48696000  | 5.19296900  |
| C | 5.49552100  | 2.36680200  | 0.01888500  | H                                    | -4.91757200 | 2.85701200  | 3.48977900  |
| C | 6.37866900  | 3.38106300  | -0.70625600 | H                                    | 1.48212000  | -3.74550600 | 3.41752900  |
| H | 6.96776900  | 2.87178100  | -1.47454600 | H                                    | -0.20067700 | -2.51872700 | 4.59026100  |
| H | 7.07345500  | 3.86311500  | -0.01016800 | Br                                   | -2.10112900 | -1.67299400 | -1.32697900 |
| H | 5.78228800  | 4.15220200  | -1.19623400 | C                                    | -3.84366600 | 1.71497400  | -2.50381300 |
| C | 6.34861400  | 1.19432200  | 0.52414400  | H                                    | -3.60634400 | 2.24930500  | -3.42283000 |
| H | 5.73253300  | 0.45213500  | 1.03928500  | C                                    | -2.80969900 | 1.59495300  | -1.60365000 |
| H | 7.13510200  | 1.52797200  | 1.20804800  | H                                    | -1.89137600 | 2.12139600  | -1.84774500 |
| H | 6.82336800  | 0.70668800  | -0.33213500 | C                                    | -2.78539000 | 0.82022900  | -0.42942700 |
| C | 4.54945300  | 2.97157100  | 1.12793600  | H                                    | -3.63196400 | 0.23568600  | -0.10710300 |
| C | 5.08393900  | 2.88557700  | 2.55662800  | H                                    | -2.01920000 | 1.01336500  | 0.31086700  |
| H | 4.34674500  | 3.30305100  | 3.24880000  | C                                    | -5.21182400 | 1.22821500  | -2.43369500 |
| H | 6.00998900  | 3.46058400  | 2.66284100  | C                                    | -5.91309900 | 1.01041400  | -1.22698900 |
| H | 5.27774900  | 1.85315300  | 2.85338100  | C                                    | -5.89808800 | 0.99531800  | -3.64681700 |
| C | 4.09828100  | 4.40685700  | 0.82018700  | C                                    | -7.22033700 | 0.53393700  | -1.23925700 |
| H | 3.70042300  | 4.48717700  | -0.19505200 | H                                    | -5.44686000 | 1.26354200  | -0.28189300 |
| H | 4.91701200  | 5.12408400  | 0.93397600  | C                                    | -7.19996200 | 0.50787500  | -3.65553400 |
| H | 3.29821000  | 4.68118900  | 1.51294100  | H                                    | -5.38276600 | 1.17920000  | -4.58566200 |
| C | 0.28391700  | 2.48987000  | -0.25489600 | C                                    | -7.86618900 | 0.26944400  | -2.44997100 |
| C | -0.56858500 | 3.04485400  | 0.73053600  | H                                    | -7.74463900 | 0.38166400  | -0.30018400 |
| H | -0.71653700 | 2.50382400  | 1.66277700  | H                                    | -7.69960400 | 0.31877200  | -4.60108000 |
| C | -1.19370200 | 4.27665400  | 0.55001700  | H                                    | -8.88677800 | -0.10179200 | -2.45425400 |
| H | -1.83267200 | 4.67215900  | 1.33614100  |                                      |             |             |             |
| C | -0.99497300 | 5.00890000  | -0.62362900 | <b>L<sub>1</sub>-19<sub>10</sub></b> |             |             |             |
| H | -1.47933000 | 5.97079900  | -0.76431800 | Cu                                   | 0.87713700  | 0.17290900  | 0.01490100  |
| C | -0.15117900 | 4.48556000  | -1.60685900 | N                                    | -1.76275300 | -0.37133800 | -1.06687800 |
| H | 0.02847800  | 5.04688200  | -2.52088000 | N                                    | -0.51315200 | 1.90641100  | 2.39180600  |
| C | 0.47643200  | 3.25192700  | -1.43060100 | N                                    | 0.86207300  | 0.32522500  | 2.98567600  |
| H | 1.13932200  | 2.87576400  | -2.20233800 | O                                    | -4.19111500 | -0.79065300 | -1.53857700 |
| H | 0.04683000  | -5.48382700 | -1.27258400 | O                                    | -3.18494400 | -1.96449500 | 0.16140800  |
| H | -0.69472200 | -3.97966200 | -0.70140000 | B                                    | -3.03067900 | -0.99895800 | -0.82192200 |
| H | 4.39868700  | -1.55176600 | 2.04323000  | C                                    | 0.17286600  | 0.83816900  | 1.93758000  |
| H | 2.93601400  | -0.64233600 | 1.64892900  | C                                    | -0.24495300 | 2.21869600  | 3.81842100  |
| H | 0.06945600  | 1.54526200  | 4.55892500  | H                                    | 0.24875900  | 3.19183900  | 3.90015300  |
| H | 0.57946900  | 0.59391400  | 3.15711700  | C                                    | 0.66124000  | 1.06077900  | 4.25510800  |
| H | -4.77154800 | -2.43434000 | 2.02563900  |                                      |             |             |             |

|   |             |             |             |    |             |             |             |
|---|-------------|-------------|-------------|----|-------------|-------------|-------------|
| H | 1.61816300  | 1.40331400  | 4.65784900  | H  | -5.47256100 | -0.20523000 | 0.74231300  |
| C | 1.60762700  | -0.90377200 | 2.98811500  | H  | -6.93245600 | -1.15326100 | 0.39392800  |
| C | 3.01705600  | -0.86799100 | 2.96274600  | H  | -6.45725800 | 0.17758300  | -0.67728300 |
| C | 3.70953700  | -2.08378600 | 2.98406100  | C  | -4.43208200 | -2.65871900 | -0.10626000 |
| H | 4.79654000  | -2.06246500 | 2.95383100  | C  | -5.05789400 | -3.06118600 | 1.22769800  |
| C | 3.05229500  | -3.31552900 | 3.05408200  | H  | -4.40481100 | -3.77546200 | 1.73752000  |
| C | 1.65699700  | -3.31245500 | 3.13875200  | H  | -6.02858600 | -3.54348700 | 1.07263100  |
| H | 1.12797700  | -4.25749700 | 3.24113000  | H  | -5.19677700 | -2.20134700 | 1.88542300  |
| C | 0.91530000  | -2.12545200 | 3.11916100  | C  | -4.07629700 | -3.91108100 | -0.91948000 |
| C | -0.58755100 | -2.18754200 | 3.27292400  | H  | -3.60559300 | -3.64890100 | -1.87062300 |
| H | -0.96566500 | -1.38595100 | 3.91326000  | H  | -4.95794300 | -4.52675200 | -1.12181100 |
| C | 3.78200600  | 0.43299400  | 2.94391900  | H  | -3.35917600 | -4.50928000 | -0.35107300 |
| H | 3.72855300  | 0.93749400  | 3.91730800  | C  | -0.32772400 | -2.37981400 | -1.37909700 |
| C | -1.56099300 | 2.64045200  | 1.73147400  | C  | 0.22629900  | -3.51373100 | -0.74909300 |
| C | -1.31281200 | 3.92349400  | 1.20758400  | H  | 0.45163000  | -3.47147000 | 0.31398900  |
| C | 0.04528000  | 4.57297200  | 1.28607400  | C  | 0.46686600  | -4.69137000 | -1.45447300 |
| H | 0.24679700  | 4.93907100  | 2.30192200  | H  | 0.88947300  | -5.54963200 | -0.93861200 |
| C | -2.38585100 | 4.62252300  | 0.64396000  | C  | 0.15436500  | -4.77576400 | -2.81327100 |
| H | -2.19684400 | 5.60707900  | 0.22246700  | H  | 0.33792600  | -5.69380900 | -3.36389400 |
| C | -3.68329500 | 4.10616300  | 0.61872100  | C  | -0.40782700 | -3.66828000 | -3.45191600 |
| C | -3.90561400 | 2.85662100  | 1.20345100  | H  | -0.66639200 | -3.72229000 | -4.50617000 |
| H | -4.91554200 | 2.45368400  | 1.23223400  | C  | -0.64610800 | -2.48723100 | -2.74797800 |
| C | -2.86584000 | 2.11210000  | 1.76958000  | H  | -1.09435700 | -1.64212900 | -3.25921500 |
| C | -3.16626000 | 0.79075700  | 2.43772700  | H  | 0.09520200  | 5.43696000  | 0.61813700  |
| H | -2.68052000 | 0.70637500  | 3.41533400  | H  | 0.84339000  | 3.88043000  | 1.00969800  |
| C | -0.61699800 | -1.15848900 | -0.57425700 | H  | -4.24278500 | 0.68431900  | 2.59874000  |
| H | -0.84030600 | -1.46375200 | 0.44429500  | H  | -2.83425000 | -0.06191100 | 1.83875300  |
| C | -1.61158900 | 0.72228100  | -1.96624300 | H  | -0.88130500 | -3.14102600 | 3.72063500  |
| C | -0.41723300 | 0.94320500  | -2.66922900 | H  | -1.11511400 | -2.10390500 | 2.31686200  |
| H | 0.42216800  | 0.27365700  | -2.54504600 | H  | 4.83943600  | 0.25159800  | 2.73438100  |
| C | -0.28596500 | 2.03098600  | -3.53442700 | H  | 3.39752200  | 1.12200300  | 2.18644100  |
| H | 0.65874800  | 2.17678400  | -4.05005300 | C  | -4.81055700 | 4.87631400  | -0.02661200 |
| C | -1.34300600 | 2.91508900  | -3.73454800 | H  | -5.78512200 | 4.56185000  | 0.35863700  |
| H | -1.24045700 | 3.75783200  | -4.41170300 | H  | -4.70915600 | 5.95312200  | 0.14158600  |
| C | -2.53499500 | 2.70128300  | -3.03811800 | H  | -4.82000000 | 4.71874500  | -1.11229600 |
| H | -3.37201100 | 3.38228600  | -3.17053000 | C  | 3.82814900  | -4.61122600 | 3.03872000  |
| C | -2.66910500 | 1.63154800  | -2.15820200 | H  | 4.79949300  | -4.50256600 | 3.53072000  |
| H | -3.59508700 | 1.49775200  | -1.61614000 | H  | 3.27952400  | -5.41319900 | 3.54154400  |
| C | -5.24526900 | -1.58374200 | -0.93345800 | H  | 4.02098700  | -4.94190900 | 2.01057100  |
| C | -6.11375200 | -2.15178900 | -2.05557700 | H  | -1.18369600 | 2.26468600  | 4.37884500  |
| H | -6.59880300 | -1.33141700 | -2.59227500 | H  | 0.19393000  | 0.40679700  | 5.00088400  |
| H | -6.89682600 | -2.80325800 | -1.65326300 | Br | 2.36783500  | 2.09656600  | -0.10458600 |
| H | -5.52081100 | -2.71910600 | -2.77451200 | C  | 3.53957300  | -0.41451100 | -2.98935200 |
| C | -6.07804600 | -0.63929700 | -0.05685200 | H  | 3.39150100  | -0.43301200 | -4.06925700 |

|                                        |             |             |             |   |             |             |             |
|----------------------------------------|-------------|-------------|-------------|---|-------------|-------------|-------------|
| C                                      | 2.54844900  | -0.98040300 | -2.24767500 | C | -1.49094200 | -4.05092700 | 0.04064500  |
| H                                      | 1.76264300  | -1.47198500 | -2.81763500 | C | -0.17133200 | -4.65231500 | 0.45016700  |
| C                                      | 2.37550700  | -1.00308400 | -0.81118500 | H | 0.36029500  | -5.09146500 | -0.40194700 |
| H                                      | 3.17310600  | -0.56131300 | -0.22605300 | C | -2.67004300 | -4.44110300 | 0.68513900  |
| H                                      | 2.00798300  | -1.94503500 | -0.41259500 | H | -2.60487500 | -5.17326400 | 1.48653500  |
| C                                      | 4.79938700  | 0.21123200  | -2.57737400 | C | -3.92135500 | -3.93689300 | 0.31957300  |
| C                                      | 5.52288800  | -0.16758600 | -1.42928300 | C | -3.98083400 | -3.01803200 | -0.73227300 |
| C                                      | 5.36041700  | 1.20096400  | -3.40931100 | H | -4.94914900 | -2.64642200 | -1.05909000 |
| C                                      | 6.72968800  | 0.44915000  | -1.10821500 | C | -2.82997500 | -2.57871100 | -1.39672100 |
| H                                      | 5.15281600  | -0.97413400 | -0.80641400 | C | -2.94863100 | -1.57716400 | -2.52232000 |
| C                                      | 6.56114400  | 1.82418800  | -3.08326100 | H | -2.25697200 | -1.78834200 | -3.34271800 |
| H                                      | 4.82866200  | 1.49291800  | -4.31130500 | C | -0.51817600 | 1.53280200  | -0.06625900 |
| C                                      | 7.25104100  | 1.45383400  | -1.92626900 | H | -0.61210900 | 1.11313500  | -1.06788000 |
| H                                      | 7.27198000  | 0.13648600  | -0.21994700 | C | -1.40720500 | 0.49390500  | 2.11145300  |
| H                                      | 6.96241200  | 2.59649500  | -3.73360400 | C | -0.55033900 | 1.07741800  | 3.05131300  |
| H                                      | 8.19220400  | 1.93324500  | -1.67264200 | H | 0.05256100  | 1.93296300  | 2.78023500  |
| <b>L<sub>1</sub>-TS20<sub>10</sub></b> |             |             |             | C | -0.44297800 | 0.54167900  | 4.33464600  |
| Cu                                     | 0.68049600  | -0.44867500 | 0.04824600  | H | 0.24024100  | 0.99912000  | 5.04465000  |
| N                                      | -1.59170000 | 1.02719700  | 0.79202400  | C | -1.20158200 | -0.56628100 | 4.70779500  |
| N                                      | -0.41265300 | -2.73751700 | -1.73885800 | H | -1.11588000 | -0.97905400 | 5.70864000  |
| N                                      | 1.32307100  | -1.71214200 | -2.55128900 | C | -2.05753200 | -1.15106000 | 3.77320500  |
| O                                      | -4.02535800 | 1.38472100  | 1.15979800  | H | -2.64183900 | -2.02715900 | 4.04060800  |
| O                                      | -3.20787100 | 1.64604000  | -0.97603300 | C | -2.15235400 | -0.63487400 | 2.48348500  |
| B                                      | -2.92076300 | 1.32114700  | 0.33903200  | H | -2.79796700 | -1.10944600 | 1.75241700  |
| C                                      | 0.40290100  | -1.67810700 | -1.55779000 | C | -5.18544200 | 1.63646300  | 0.32732400  |
| C                                      | -0.05127000 | -3.57965200 | -2.90556900 | C | -6.10984200 | 2.59414500  | 1.07900400  |
| H                                      | 0.18703600  | -4.59663300 | -2.57893100 | H | -6.47075600 | 2.11035600  | 1.99104800  |
| C                                      | 1.16086200  | -2.84326400 | -3.49145600 | H | -6.97995800 | 2.86014800  | 0.46924500  |
| H                                      | 2.06400600  | -3.46099400 | -3.51128300 | H | -5.59198700 | 3.51006800  | 1.36812700  |
| C                                      | 2.35815600  | -0.74385400 | -2.77232300 | C | -5.88944600 | 0.29056600  | 0.11724000  |
| C                                      | 3.65157100  | -0.98260400 | -2.27164600 | H | -5.23624100 | -0.42032900 | -0.39332800 |
| C                                      | 4.64783200  | -0.03765600 | -2.54925700 | H | -6.81191500 | 0.40041700  | -0.46114400 |
| H                                      | 5.65265000  | -0.21520900 | -2.17277400 | H | -6.14232600 | -0.13074200 | 1.09407800  |
| C                                      | 4.39297900  | 1.11734100  | -3.29472100 | C | -4.54122800 | 2.22647400  | -0.99315100 |
| C                                      | 3.09923700  | 1.31259700  | -3.79087000 | C | -5.23321000 | 1.81519500  | -2.29152800 |
| H                                      | 2.88553800  | 2.19566100  | -4.38916100 | H | -4.69050100 | 2.23413000  | -3.14401600 |
| C                                      | 2.07241300  | 0.39426200  | -3.55099600 | H | -6.25846700 | 2.19855700  | -2.32357700 |
| C                                      | 0.69655100  | 0.62052500  | -4.13420900 | H | -5.26384700 | 0.73100100  | -2.41008800 |
| H                                      | 0.43982800  | -0.14712000 | -4.87422800 | C | -4.36604100 | 3.75086300  | -0.95788400 |
| C                                      | 3.96596500  | -2.20604900 | -1.44593900 | H | -3.86324900 | 4.07661200  | -0.04402000 |
| H                                      | 3.69467100  | -3.13094400 | -1.96706900 | H | -5.32769100 | 4.26788100  | -1.03104000 |
| C                                      | -1.58573400 | -3.09327900 | -0.98831000 | H | -3.74391400 | 4.05509800  | -1.80390900 |
|                                        |             |             |             | C | -0.44306400 | 3.01628900  | -0.15755000 |
|                                        |             |             |             | C | 0.06387300  | 3.62801100  | -1.32143500 |

|    |             |             |             |                                    |             |             |             |
|----|-------------|-------------|-------------|------------------------------------|-------------|-------------|-------------|
| H  | 0.40064000  | 3.00473200  | -2.14585100 | H                                  | 6.06795700  | -0.26464700 | 4.87562700  |
| C  | 0.11782900  | 5.01412200  | -1.44554700 | H                                  | 7.25001400  | -1.18283500 | 2.88646900  |
| H  | 0.50913600  | 5.45749300  | -2.35719400 |                                    |             |             |             |
| C  | -0.34176300 | 5.83271400  | -0.41047700 | <b>L<sub>1</sub>-7<sub>2</sub></b> |             |             |             |
| H  | -0.30294000 | 6.91375000  | -0.50714000 |                                    |             |             |             |
| C  | -0.86284800 | 5.24489800  | 0.74364600  | C                                  | -1.12206000 | 2.12643300  | -0.17244400 |
| H  | -1.23286000 | 5.86920000  | 1.55242700  | C                                  | -1.20533300 | 4.07172200  | -1.51641500 |
| C  | -0.91491500 | 3.85627100  | 0.86993700  | C                                  | -2.63407400 | 3.53417200  | -1.32610300 |
| H  | -1.33873400 | 3.41470200  | 1.76541100  | N                                  | -2.39906900 | 2.27697900  | -0.57804000 |
| H  | -0.32575900 | -5.44499600 | 1.18695000  | N                                  | -0.41307200 | 3.16808400  | -0.65055200 |
| H  | 0.48694300  | -3.89427000 | 0.89111500  | C                                  | -4.05080000 | 1.56153200  | 1.09430200  |
| H  | -3.96310100 | -1.58286600 | -2.93191900 | C                                  | -3.49386500 | 1.43152600  | -0.19247700 |
| H  | -2.74150400 | -0.55864000 | -2.17594500 | C                                  | -4.01351000 | 0.51701000  | -1.12482800 |
| H  | 0.64427300  | 1.58913200  | -4.63849900 | C                                  | -5.10746900 | -0.26769500 | -0.74356800 |
| H  | -0.08354900 | 0.59241900  | -3.36746000 | C                                  | -5.68425300 | -0.16633600 | 0.52477200  |
| H  | 5.03503300  | -2.25356200 | -1.22374500 | C                                  | -5.14154300 | 0.75458600  | 1.42738400  |
| H  | 3.42011900  | -2.19673400 | -0.49413100 | H                                  | -5.51037300 | -0.98252900 | -1.45713000 |
| C  | -5.17407800 | -4.36979400 | 1.04455600  | H                                  | -5.57647500 | 0.84734400  | 2.41998300  |
| H  | -5.09969100 | -5.40579900 | 1.38890700  | C                                  | 1.47547200  | 4.23382000  | 0.48617000  |
| H  | -5.35291800 | -3.74637400 | 1.92942500  | C                                  | 2.85532300  | 4.42212800  | 0.60247600  |
| H  | -6.05735600 | -4.28649500 | 0.40405600  | C                                  | 3.76410400  | 3.74588200  | -0.21759900 |
| C  | 5.47961100  | 2.13690100  | -3.54317400 | C                                  | 3.26157800  | 2.86466900  | -1.17950800 |
| H  | 5.34353000  | 2.64195800  | -4.50434900 | C                                  | 1.88912200  | 2.64696100  | -1.33774300 |
| H  | 5.47818600  | 2.91090700  | -2.76572300 | C                                  | 1.00466700  | 3.34229000  | -0.49436100 |
| H  | 6.47093100  | 1.67438700  | -3.53878400 | H                                  | 3.22880800  | 5.10752400  | 1.35990300  |
| H  | -0.89349900 | -3.63970000 | -3.60263400 | H                                  | 3.95315900  | 2.32104900  | -1.81839600 |
| H  | 0.98533700  | -2.47294400 | -4.50760700 | Cu                                 | -0.38913900 | 0.63652300  | 0.89724100  |
| Br | 1.79108300  | -1.79303900 | 1.75364800  | C                                  | -6.84332000 | -1.04803200 | 0.92653800  |
| C  | 3.07966200  | 2.15611200  | 2.31472600  | H                                  | -7.37299200 | -1.43755300 | 0.05234700  |
| H  | 3.04125400  | 2.88627400  | 3.12382500  | H                                  | -6.49802700 | -1.90875400 | 1.51247800  |
| C  | 2.11494300  | 2.27954000  | 1.37012800  | H                                  | -7.56392800 | -0.50478900 | 1.54614500  |
| H  | 1.47037100  | 3.14945200  | 1.47040800  | C                                  | 5.25251900  | 3.93718500  | -0.04467300 |
| C  | 1.84124400  | 1.41462000  | 0.23154200  | H                                  | 5.78746500  | 3.79492600  | -0.98839700 |
| H  | 2.48420600  | 0.53331400  | 0.19467500  | H                                  | 5.48731700  | 4.93709600  | 0.33270500  |
| H  | 1.77421700  | 1.91379100  | -0.72829600 | H                                  | 5.66021300  | 3.21449700  | 0.67306600  |
| C  | 4.19965700  | 1.21423800  | 2.42353500  | C                                  | -3.41274500 | 0.36341500  | -2.50158500 |
| C  | 4.89105900  | 0.70113800  | 1.31059800  | H                                  | -3.72756500 | 1.17058500  | -3.17618300 |
| C  | 4.66345700  | 0.86704300  | 3.70707200  | H                                  | -2.32049200 | 0.37445500  | -2.46274800 |
| C  | 5.97796000  | -0.15423400 | 1.47939300  | H                                  | -3.72199200 | -0.58199100 | -2.95287400 |
| H  | 4.59716300  | 0.99939300  | 0.30999300  | C                                  | -3.47886900 | 2.52395200  | 2.10729200  |
| C  | 5.74081500  | 0.00279500  | 3.87480400  | H                                  | -2.50044900 | 2.17986100  | 2.46242800  |
| H  | 4.15272000  | 1.26885800  | 4.57834600  | H                                  | -3.33502200 | 3.52621200  | 1.68940900  |
| C  | 6.40304600  | -0.51477000 | 2.75884800  | H                                  | -4.14051900 | 2.61150200  | 2.97288900  |
| H  | 6.50226100  | -0.53441800 | 0.60680200  | C                                  | 1.38712400  | 1.66179100  | -2.36550000 |

|   |             |             |             |
|---|-------------|-------------|-------------|
| H | 2.19655600  | 1.35395200  | -3.03174100 |
| H | 0.99155500  | 0.76176600  | -1.88116500 |
| H | 0.58265700  | 2.08033100  | -2.97996900 |
| C | 0.52443700  | 4.95256100  | 1.41317100  |
| H | 1.07574400  | 5.54285400  | 2.14934500  |
| H | -0.14139300 | 5.63783600  | 0.87470100  |
| H | -0.11128000 | 4.24355600  | 1.95335900  |
| C | 3.06470000  | -2.04228400 | -1.64181500 |
| C | 3.62938600  | -1.23374000 | -0.63888100 |
| C | 3.88498700  | -2.51721700 | -2.68229800 |
| C | 4.97203500  | -0.86654000 | -0.71100900 |
| H | 3.00189000  | -0.91169700 | 0.18708700  |
| C | 5.23036200  | -2.15602900 | -2.73637200 |
| H | 3.47673600  | -3.19574700 | -3.42560300 |
| C | 5.77765200  | -1.32084900 | -1.75929600 |
| H | 5.39364900  | -0.23501300 | 0.06603100  |
| H | 5.85638000  | -2.53840900 | -3.53826300 |
| H | 6.82764000  | -1.04561500 | -1.80296900 |
| C | -0.44999400 | -2.93528900 | -2.44603300 |
| C | -1.13979700 | -3.28642200 | -3.61797400 |
| C | -1.13290000 | -2.94923300 | -1.21496900 |
| C | -2.48072500 | -3.66562900 | -3.56618500 |
| H | -0.61575800 | -3.27040900 | -4.57110500 |
| C | -2.47378900 | -3.31969400 | -1.16934300 |
| H | -0.61189200 | -2.65533500 | -0.31029800 |
| C | -3.14941400 | -3.68482600 | -2.33992200 |
| H | -3.00096000 | -3.94714000 | -4.47748000 |
| H | -2.99425300 | -3.31903000 | -0.21637100 |
| H | -4.19382600 | -3.98198800 | -2.29558400 |
| B | 0.40335400  | -0.85070100 | 1.97138900  |
| C | 1.88101100  | -1.96407400 | 3.38526700  |
| O | 1.72054300  | -0.87093100 | 2.44394800  |
| C | 0.69811800  | -2.92531200 | 2.99562700  |
| O | -0.25177700 | -2.01631900 | 2.37660700  |
| C | 3.28198800  | -2.55313300 | 3.21709300  |
| H | 4.03022800  | -1.80141900 | 3.48755700  |
| H | 3.42586500  | -3.42131200 | 3.87026300  |
| H | 3.46942700  | -2.85690600 | 2.18587400  |
| C | 1.74064600  | -1.35804400 | 4.79091300  |
| H | 0.74854200  | -0.92131100 | 4.93365300  |
| H | 1.91406200  | -2.09946100 | 5.57818600  |
| H | 2.47819200  | -0.55798900 | 4.90321400  |
| C | 1.08127000  | -3.97049600 | 1.93770600  |
| H | 1.77181700  | -4.72071100 | 2.33772300  |

|   |             |             |             |
|---|-------------|-------------|-------------|
| H | 0.17460900  | -4.48695700 | 1.60746000  |
| H | 1.53431000  | -3.50144700 | 1.06079700  |
| C | 0.00600300  | -3.61462800 | 4.17296400  |
| H | -0.39308300 | -2.89193000 | 4.88700700  |
| H | -0.82956000 | -4.21597600 | 3.80189800  |
| H | 0.69492000  | -4.28430400 | 4.70042400  |
| H | -3.14422600 | 3.33558400  | -2.27246400 |
| H | -3.26464100 | 4.20980800  | -0.73571700 |
| H | -0.86090700 | 3.99501200  | -2.55456700 |
| H | -1.09436000 | 5.11280100  | -1.20079900 |
| C | 0.96643500  | -2.55897400 | -2.53818500 |
| N | 1.70297700  | -2.36986000 | -1.50742000 |
| H | 1.35764900  | -2.43986100 | -3.56096000 |

#### L<sub>1</sub>-TS8<sub>2</sub>

|    |             |             |             |
|----|-------------|-------------|-------------|
| C  | -0.02073700 | -1.92594300 | -0.58279400 |
| C  | 0.58909200  | -3.98969800 | -1.57345300 |
| C  | -0.93296200 | -3.79396800 | -1.70866900 |
| N  | -1.15717100 | -2.49753800 | -1.03652900 |
| N  | 1.00912300  | -2.75528000 | -0.88267000 |
| C  | -3.04331300 | -1.16820600 | -1.87749300 |
| C  | -2.48832300 | -1.98259800 | -0.87745000 |
| C  | -3.22855700 | -2.35512800 | 0.26169800  |
| C  | -4.54094200 | -1.89660200 | 0.37710400  |
| C  | -5.12726400 | -1.08496200 | -0.60099200 |
| C  | -4.36566300 | -0.73646200 | -1.71750100 |
| H  | -5.11331300 | -2.16357100 | 1.26194000  |
| H  | -4.80408100 | -0.10268700 | -2.48492500 |
| C  | 3.21637300  | -1.86483100 | -1.47217500 |
| C  | 4.56322700  | -1.68185600 | -1.13539100 |
| C  | 5.08829600  | -2.12496600 | 0.08143700  |
| C  | 4.22952800  | -2.77082500 | 0.97881100  |
| C  | 2.87942500  | -2.97893300 | 0.68768200  |
| C  | 2.38301100  | -2.51839900 | -0.54774900 |
| H  | 5.21460500  | -1.17583200 | -1.84397400 |
| H  | 4.61945300  | -3.11888400 | 1.93272700  |
| Cu | 0.20235200  | -0.21597700 | 0.18408200  |
| C  | -6.53957400 | -0.57945500 | -0.42811700 |
| H  | -7.22873600 | -1.39145900 | -0.17143000 |
| H  | -6.58940900 | 0.15493100  | 0.38448700  |
| H  | -6.90833700 | -0.09724800 | -1.33770900 |
| C  | 6.53943600  | -1.89914300 | 0.43543500  |
| H  | 7.00682900  | -2.81581600 | 0.81089400  |

|   |             |             |             |                                    |             |             |             |
|---|-------------|-------------|-------------|------------------------------------|-------------|-------------|-------------|
| H | 7.11417500  | -1.55627500 | -0.42920700 | O                                  | -1.00074500 | 2.14231000  | -1.17053700 |
| H | 6.63900200  | -1.14225300 | 1.22272000  | C                                  | 1.57212100  | 4.67784600  | -1.91741900 |
| C | -2.61278300 | -3.19861300 | 1.35191500  | H                                  | 2.60355700  | 4.50345800  | -2.23806900 |
| H | -2.24592800 | -4.16048800 | 0.97473700  | H                                  | 1.16681400  | 5.50202200  | -2.51522200 |
| H | -1.76342700 | -2.68086100 | 1.80906000  | H                                  | 1.59541500  | 4.98090200  | -0.86962000 |
| H | -3.34300300 | -3.40447800 | 2.13794800  | C                                  | 0.92607200  | 2.88393400  | -3.54766500 |
| C | -2.23754800 | -0.71302800 | -3.06980800 | H                                  | 0.34477800  | 1.97223500  | -3.71068100 |
| H | -1.59116800 | 0.12428500  | -2.78364700 | H                                  | 0.62249600  | 3.62894500  | -4.29028900 |
| H | -1.59523000 | -1.50420400 | -3.46776500 | H                                  | 1.98129100  | 2.64696300  | -3.71094000 |
| H | -2.89591300 | -0.37325400 | -3.87426000 | C                                  | -0.96628500 | 4.45745300  | -0.48553800 |
| C | 1.97690000  | -3.66643500 | 1.68479600  | H                                  | -0.82131700 | 5.50008700  | -0.78574800 |
| H | 2.52825000  | -3.91825900 | 2.59416000  | H                                  | -1.99010400 | 4.34872200  | -0.11610400 |
| H | 1.13423400  | -3.02511800 | 1.96298600  | H                                  | -0.28593800 | 4.23147800  | 0.33928700  |
| H | 1.55642000  | -4.59629200 | 1.28395300  | C                                  | -1.75124900 | 3.79178600  | -2.77520800 |
| C | 2.67620700  | -1.33803500 | -2.77995200 | H                                  | -1.70963000 | 3.04045200  | -3.56591300 |
| H | 3.48598100  | -0.95146000 | -3.40404400 | H                                  | -2.76585700 | 3.79460500  | -2.36584900 |
| H | 2.15275600  | -2.11201700 | -3.35180700 | H                                  | -1.56333800 | 4.77612500  | -3.21822400 |
| H | 1.96384700  | -0.52495800 | -2.60278500 | H                                  | -1.50696400 | -4.58531100 | -1.21545900 |
| C | 1.72904400  | 1.81815700  | 1.60014700  | H                                  | -1.26146800 | -3.74462600 | -2.75295600 |
| C | 2.88940000  | 1.23469300  | 1.08009200  | H                                  | 0.85024400  | -4.87262200 | -0.97914200 |
| C | 1.84688100  | 2.84755900  | 2.54828900  | H                                  | 1.09072900  | -4.07981600 | -2.54315500 |
| C | 4.14635900  | 1.68945900  | 1.48744900  | C                                  | -0.21477100 | 0.60591900  | 2.15137100  |
| H | 2.80732500  | 0.43815200  | 0.34827700  | N                                  | 0.39582700  | 1.44022100  | 1.22001200  |
| C | 3.10280900  | 3.28927700  | 2.95674400  | H                                  | 0.44004800  | 0.12816700  | 2.87829900  |
| H | 0.94271500  | 3.29347300  | 2.95169600  |                                    |             |             |             |
| C | 4.26174200  | 2.71500500  | 2.42456800  | <b>L<sub>1</sub>-9<sub>2</sub></b> |             |             |             |
| H | 5.03679400  | 1.23053800  | 1.06629900  | C                                  | -1.60983200 | -1.73737000 | -0.00480800 |
| H | 3.17642700  | 4.08822000  | 3.68973900  | C                                  | -2.59277500 | -3.84690000 | -0.43277900 |
| H | 5.24091200  | 3.06234500  | 2.74170000  | C                                  | -3.70550300 | -2.80140500 | -0.25647600 |
| C | -1.63193600 | 0.66565900  | 2.47046900  | N                                  | -2.93812800 | -1.53904900 | -0.14753100 |
| C | -2.12256900 | -0.07488200 | 3.57192800  | N                                  | -1.37889500 | -3.06290200 | -0.11555100 |
| C | -2.55350000 | 1.45507000  | 1.74585700  | C                                  | -4.11582900 | 0.32732900  | -1.20530400 |
| C | -3.46218800 | -0.01987600 | 3.93861600  | C                                  | -3.61207100 | -0.27596100 | -0.03701000 |
| H | -1.42941300 | -0.68457400 | 4.14804700  | C                                  | -3.80177900 | 0.31367000  | 1.22717600  |
| C | -3.89513700 | 1.49988400  | 2.11874000  | C                                  | -4.47696300 | 1.53710200  | 1.29021700  |
| H | -2.20410800 | 2.02148200  | 0.89097000  | C                                  | -4.96732000 | 2.17587600  | 0.14819600  |
| C | -4.36355200 | 0.77037700  | 3.21499600  | C                                  | -4.78374900 | 1.54995700  | -1.08855300 |
| H | -3.80644900 | -0.58843400 | 4.79928200  | H                                  | -4.61983000 | 2.00193000  | 2.26284200  |
| H | -4.58273200 | 2.12077100  | 1.54896900  | H                                  | -5.16882700 | 2.02431900  | -1.98846700 |
| H | -5.40880700 | 0.82047000  | 3.50698100  | C                                  | 0.70007300  | -3.66745600 | -1.27980900 |
| B | 0.22391900  | 1.62318600  | -0.74391100 | C                                  | 1.94514300  | -4.30273600 | -1.24932000 |
| C | 0.75365400  | 3.40187000  | -2.11204900 | C                                  | 2.42723300  | -4.93219900 | -0.09736800 |
| O | 1.28285800  | 2.38123000  | -1.22559200 | C                                  | 1.62528000  | -4.92078600 | 1.04817400  |
| C | -0.75065700 | 3.49376700  | -1.66067600 |                                    |             |             |             |

|    |             |             |             |                                     |             |             |             |
|----|-------------|-------------|-------------|-------------------------------------|-------------|-------------|-------------|
| C  | 0.37365800  | -4.29851800 | 1.06750200  | H                                   | 0.38197400  | 0.10882600  | 3.78169700  |
| C  | -0.07875200 | -3.67432800 | -0.10844700 | C                                   | -0.29161900 | 3.77849100  | 2.78065000  |
| H  | 2.55547200  | -4.30074600 | -2.14948700 | H                                   | 0.68007700  | 3.30107300  | 0.92478200  |
| H  | 1.98524800  | -5.40114500 | 1.95496400  | C                                   | -0.70647400 | 3.32585800  | 4.03469100  |
| Cu | -0.21957200 | -0.46825300 | 0.43542700  | H                                   | -0.75119000 | 1.62381900  | 5.36210600  |
| C  | -5.65702400 | 3.51583700  | 0.24799600  | H                                   | -0.45905600 | 4.81513300  | 2.49660900  |
| H  | -6.25991300 | 3.58855100  | 1.15846400  | H                                   | -1.19977400 | 3.99751200  | 4.73157500  |
| H  | -4.92485200 | 4.33201000  | 0.27941300  | B                                   | 1.76409100  | 1.57938000  | -0.99547100 |
| H  | -6.31206900 | 3.69566700  | -0.60946200 | C                                   | 1.79586300  | 2.39484700  | -3.13879500 |
| C  | 3.79241900  | -5.57800500 | -0.08193300 | O                                   | 2.48515900  | 2.38204600  | -1.86991600 |
| H  | 3.84031100  | -6.39766800 | 0.64109100  | C                                   | 0.31986900  | 2.03075600  | -2.72093600 |
| H  | 4.05890300  | -5.97545200 | -1.06594300 | O                                   | 0.53298300  | 1.21263800  | -1.54187300 |
| H  | 4.56575800  | -4.85154600 | 0.19629300  | C                                   | 1.96961300  | 3.77595900  | -3.76965900 |
| C  | -3.29241200 | -0.32414800 | 2.49709800  | H                                   | 3.02675400  | 3.94574600  | -3.99363200 |
| H  | -3.34122500 | -1.41615300 | 2.45951400  | H                                   | 1.40758600  | 3.85334000  | -4.70657500 |
| H  | -2.24877100 | -0.04757600 | 2.68366600  | H                                   | 1.63930200  | 4.56818700  | -3.09578000 |
| H  | -3.87913000 | 0.01464800  | 3.35539200  | C                                   | 2.45224600  | 1.32613400  | -4.02639100 |
| C  | -3.96278500 | -0.31997800 | -2.56186600 | H                                   | 2.33647400  | 0.32809300  | -3.59382600 |
| H  | -2.97815100 | -0.77885300 | -2.68388000 | H                                   | 2.03113800  | 1.31850000  | -5.03658000 |
| H  | -4.71209600 | -1.10617900 | -2.72303800 | H                                   | 3.52203900  | 1.53985400  | -4.10281300 |
| H  | -4.09904500 | 0.41594400  | -3.35869900 | C                                   | -0.50560700 | 3.24912900  | -2.28412700 |
| C  | -0.45077100 | -4.27619400 | 2.33240600  | H                                   | -0.76835500 | 3.88694100  | -3.13404600 |
| H  | 0.09370700  | -4.74398600 | 3.15636000  | H                                   | -1.42898600 | 2.90060800  | -1.81325200 |
| H  | -0.69451200 | -3.24960300 | 2.62484500  | H                                   | 0.03811500  | 3.85342600  | -1.55304600 |
| H  | -1.39953100 | -4.81415600 | 2.21779300  | C                                   | -0.45925800 | 1.21692800  | -3.75169100 |
| C  | 0.23157400  | -2.96572700 | -2.53218800 | H                                   | 0.03389100  | 0.26856400  | -3.97357500 |
| H  | 0.90216200  | -3.18139900 | -3.36802400 | H                                   | -1.45914600 | 0.99965900  | -3.36740700 |
| H  | -0.77833100 | -3.27248600 | -2.82614300 | H                                   | -0.57103000 | 1.77728200  | -4.68625800 |
| H  | 0.20926400  | -1.87998000 | -2.38525500 | H                                   | -4.29120500 | -2.95986000 | 0.65733300  |
| C  | 3.53572500  | 1.38525500  | 0.74131700  | H                                   | -4.39820100 | -2.76937800 | -1.10097800 |
| C  | 4.61653800  | 1.29481600  | -0.15741000 | H                                   | -2.69626100 | -4.69943100 | 0.24384500  |
| C  | 3.82883800  | 1.61038000  | 2.09905500  | H                                   | -2.53543200 | -4.23363100 | -1.45761200 |
| C  | 5.92903800  | 1.44757800  | 0.28274200  | C                                   | 1.23212800  | 0.59801400  | 1.25984400  |
| H  | 4.42080500  | 1.10763400  | -1.20568700 | N                                   | 2.19562700  | 1.19567200  | 0.29901800  |
| C  | 5.14715700  | 1.75458500  | 2.53146500  | H                                   | 1.78795300  | -0.14239700 | 1.84853600  |
| H  | 3.02218400  | 1.69036000  | 2.81652000  |                                     |             |             |             |
| C  | 6.20957600  | 1.67801300  | 1.63108100  | <b>L<sub>1</sub>-16<sub>2</sub></b> |             |             |             |
| H  | 6.74049300  | 1.37166400  | -0.43702500 | Cu                                  | -0.83290200 | 0.00581400  | -0.46942100 |
| H  | 5.33885800  | 1.93456200  | 3.58634600  | N                                   | 1.83500000  | 0.71881600  | 0.36943400  |
| H  | 7.23468300  | 1.79102500  | 1.97211500  | N                                   | -3.75564200 | 0.53408400  | -0.28737100 |
| C  | 0.59479400  | 1.57168400  | 2.20840200  | N                                   | -3.18436200 | -1.53263400 | 0.07407200  |
| C  | 0.18261400  | 1.13856400  | 3.48855800  | O                                   | 4.08220800  | 1.50928100  | 1.11043900  |
| C  | 0.34755100  | 2.91978100  | 1.88544100  | O                                   | 3.63500700  | 1.38259300  | -1.14977500 |
| C  | -0.45748300 | 1.99444600  | 4.38237900  |                                     |             |             |             |



|   |             |             |             |   |             |             |             |
|---|-------------|-------------|-------------|---|-------------|-------------|-------------|
| B | 3.14811400  | 1.20997100  | 0.13346500  | H | 5.88803700  | 4.12018900  | 0.00338900  |
| C | -2.70510500 | -0.30629300 | -0.21830400 | H | 4.91988900  | 3.93422000  | 1.47750000  |
| C | -5.01963000 | -0.10796300 | 0.11593900  | C | 5.06748400  | 1.49000400  | -1.01311700 |
| C | -4.65203700 | -1.58801100 | 0.08832100  | C | 5.60379700  | 2.36666600  | -2.12581500 |
| C | -2.32150900 | -2.66569000 | 0.17810200  | H | 5.45761400  | 1.87641400  | -3.09198600 |
| C | -2.11085000 | -3.24224900 | 1.44001400  | H | 6.67733800  | 2.54392000  | -1.99749500 |
| C | -1.14411700 | -4.24049100 | 1.55197500  | H | 5.09423300  | 3.33189800  | -2.15757300 |
| H | -0.95042700 | -4.67356800 | 2.53289700  | C | 5.62864300  | 0.07750300  | -1.12035100 |
| C | -0.39573400 | -4.66710400 | 0.45171500  | H | 5.27119900  | -0.54923500 | -0.29724900 |
| C | -0.66872600 | -4.10472000 | -0.79496100 | H | 6.72346400  | 0.06891400  | -1.11579100 |
| H | -0.08885200 | -4.41934000 | -1.66059500 | H | 5.27820700  | -0.37600400 | -2.05164400 |
| C | -1.63265100 | -3.11008500 | -0.96049800 | C | 1.65784200  | -1.15520800 | -1.24558700 |
| C | -1.90448100 | -2.52725900 | -2.31363800 | C | 1.40214000  | -1.60496500 | -2.55468500 |
| C | -2.88470600 | -2.77863900 | 2.63598000  | H | 0.81976200  | -0.96560100 | -3.21899600 |
| C | -3.63347500 | 1.94971900  | -0.40637600 | C | 1.87848500  | -2.82441500 | -3.01463300 |
| C | -2.97268200 | 2.68232900  | 0.59428500  | H | 1.66728700  | -3.13281800 | -4.03708700 |
| C | -2.36318400 | 2.02315200  | 1.79370000  | C | 2.63676400  | -3.64855300 | -2.17871400 |
| C | -2.87604000 | 4.06487500  | 0.42959700  | H | 3.01747100  | -4.60129900 | -2.53804900 |
| H | -2.36251500 | 4.64427100  | 1.19554800  | C | 2.90666500  | -3.21931100 | -0.88211200 |
| C | -3.41235800 | 4.72213100  | -0.67844500 | H | 3.50395900  | -3.84217400 | -0.21847400 |
| C | -4.05802400 | 3.95898700  | -1.65160900 | C | 2.42779900  | -1.99456200 | -0.42152600 |
| H | -4.46534300 | 4.45120800  | -2.53397100 | H | 2.66487900  | -1.66944100 | 0.59021500  |
| C | -4.17933300 | 2.57468600  | -1.53776400 | H | -1.36807500 | 1.60866600  | 1.57416800  |
| C | -4.84971300 | 1.77616300  | -2.61306500 | H | -5.89747000 | 1.55545400  | -2.37243400 |
| C | 1.11014100  | 0.15196800  | -0.79063000 | H | -1.45057500 | -1.53298900 | -2.42195800 |
| H | 1.22432800  | 0.86803400  | -1.61364600 | H | -3.91337400 | -3.16125700 | 2.63193500  |
| C | 1.29824300  | 0.56799000  | 1.65542300  | H | -5.83152800 | 0.14920100  | -0.57058700 |
| C | 0.50430400  | -0.54770000 | 1.98506500  | H | -5.01510300 | -2.09684700 | -0.81561800 |
| H | 0.35994600  | -1.34301900 | 1.25401700  | C | 0.66610400  | -5.71279900 | 0.60100100  |
| C | -0.05416900 | -0.66875300 | 3.25476000  | H | 0.23537100  | -6.71817300 | 0.67582400  |
| H | -0.63815500 | -1.55522700 | 3.48929500  | H | 1.34873100  | -5.70384900 | -0.25299000 |
| C | 0.15439400  | 0.30911300  | 4.22367300  | H | 1.26016500  | -5.55292700 | 1.50612200  |
| H | -0.28429900 | 0.21029100  | 5.21264400  | C | -3.31363400 | 6.21126500  | -0.80929100 |
| C | 0.95107800  | 1.40891200  | 3.90796100  | H | -3.36746800 | 6.52901700  | -1.85393700 |
| H | 1.12619100  | 2.18419800  | 4.65010200  | H | -4.13074400 | 6.71360800  | -0.27854500 |
| C | 1.51694300  | 1.53919200  | 2.64518900  | H | -2.37974400 | 6.59300800  | -0.38783900 |
| H | 2.13014400  | 2.40215500  | 2.40508900  | H | -4.85304500 | 2.32014400  | -3.56055600 |
| C | 5.21322300  | 2.08842900  | 0.41976800  | H | -4.34866200 | 0.81524000  | -2.77125200 |
| C | 6.48141800  | 1.69228500  | 1.14759100  | H | -1.49021900 | -3.16157000 | -3.10094300 |
| H | 6.50234500  | 2.14595600  | 2.14228500  | H | -2.97802400 | -2.40044500 | -2.49451200 |
| H | 7.36624200  | 2.03775600  | 0.60154000  | H | -2.42330200 | -3.12546000 | 3.56402800  |
| H | 6.55055100  | 0.60971300  | 1.26966300  | H | -2.94818700 | -1.68506800 | 2.67661200  |
| C | 5.03061900  | 3.60010800  | 0.44230500  | H | -2.23814200 | 2.73721700  | 2.61173100  |
| H | 4.13181300  | 3.89429000  | -0.10825900 | H | -2.96306900 | 1.18359300  | 2.16113100  |

|                                     |             |             |             |   |             |             |             |
|-------------------------------------|-------------|-------------|-------------|---|-------------|-------------|-------------|
| H                                   | -5.30308000 | 0.23884100  | 1.11991800  | C | 0.40423100  | 1.90660100  | 0.98446400  |
| H                                   | -5.02240100 | -2.14066400 | 0.95652700  | H | 0.07944600  | 0.93862400  | 1.35928700  |
| <b>L<sub>1</sub>-17<sub>3</sub></b> |             |             |             | C | -0.29614800 | 3.04865900  | 1.35982500  |
| Cu                                  | -0.44102900 | -0.33672200 | -0.63767100 | H | -1.17296100 | 2.93869600  | 1.99483000  |
| N                                   | 2.22775300  | 0.82179700  | -0.22587100 | C | 0.12613600  | 4.30522100  | 0.93848100  |
| N                                   | -3.21488700 | 0.38038900  | -1.41739000 | H | -0.41858000 | 5.19864000  | 1.23332600  |
| N                                   | -2.78769000 | -1.75389800 | -1.40894000 | C | 1.25797800  | 4.39730500  | 0.12944600  |
| O                                   | 4.52508500  | 1.81097100  | -0.31235900 | H | 1.59881200  | 5.37031100  | -0.21938200 |
| O                                   | 4.24933300  | -0.42461100 | -0.80557000 | C | 1.95865600  | 3.26024500  | -0.25857200 |
| B                                   | 3.63034500  | 0.76178700  | -0.44790300 | H | 2.83415700  | 3.34856000  | -0.89244200 |
| C                                   | -2.25664400 | -0.53703100 | -1.17102900 | C | 5.79140800  | 1.32869500  | -0.81806300 |
| C                                   | -4.40917800 | -0.21887300 | -2.04019300 | C | 6.90960000  | 1.98684300  | -0.03663600 |
| H                                   | -5.33098900 | 0.19629800  | -1.62550600 | H | 6.92211200  | 3.06271000  | -0.23136300 |
| C                                   | -4.22117100 | -1.69863700 | -1.73106000 | H | 7.88225000  | 1.57969000  | -0.33399400 |
| H                                   | -4.81582800 | -2.02127400 | -0.86420400 | H | 6.78676000  | 1.84063500  | 1.03810200  |
| C                                   | -2.02238600 | -2.95750400 | -1.34151900 | C | 5.86709100  | 1.71032500  | -2.29022300 |
| C                                   | -2.15981300 | -3.82456700 | -0.24759700 | H | 5.07986900  | 1.21236700  | -2.86422900 |
| C                                   | -1.36623700 | -4.97182600 | -0.21558900 | H | 6.83368600  | 1.44417200  | -2.72964600 |
| H                                   | -1.45403900 | -5.64313900 | 0.63816500  | H | 5.73109700  | 2.79030000  | -2.39112200 |
| C                                   | -0.43467800 | -5.25630100 | -1.21460200 | C | 5.66230100  | -0.21139700 | -0.60767800 |
| C                                   | -0.32839400 | -4.37285100 | -2.29044700 | C | 6.42831900  | -1.05783600 | -1.60358900 |
| H                                   | 0.39234300  | -4.57740800 | -3.08078100 | H | 6.26988400  | -2.11863900 | -1.39149000 |
| C                                   | -1.11226100 | -3.22356500 | -2.37820000 | H | 7.50363800  | -0.85876800 | -1.53935100 |
| C                                   | -0.94972800 | -2.27638600 | -3.52571200 | H | 6.10117900  | -0.86654500 | -2.62771000 |
| H                                   | -1.91369500 | -1.92811700 | -3.91377000 | C | 5.98676500  | -0.63239800 | 0.81977900  |
| C                                   | -3.08788800 | -3.50412000 | 0.88111400  | H | 5.46543300  | 0.00204100  | 1.54348300  |
| H                                   | -4.13083200 | -3.74824400 | 0.64261600  | H | 7.06069300  | -0.58021800 | 1.02608300  |
| C                                   | -3.02204000 | 1.79084900  | -1.32426000 | H | 5.65068500  | -1.66048800 | 0.97679300  |
| C                                   | -3.84584000 | 2.53098700  | -0.46077900 | C | 1.59945900  | -1.26880700 | 0.98178200  |
| C                                   | -4.94029900 | 1.89220600  | 0.33985900  | C | 1.05022400  | -2.56818500 | 0.99606100  |
| H                                   | -5.90762900 | 1.94913700  | -0.17613600 | H | 0.60584000  | -2.95298200 | 0.07686500  |
| C                                   | -3.63019400 | 3.90588100  | -0.35411000 | C | 1.04776200  | -3.34475000 | 2.14422900  |
| H                                   | -4.25428900 | 4.48040000  | 0.32965000  | H | 0.60489100  | -4.33987400 | 2.11497200  |
| C                                   | -2.63047500 | 4.55457900  | -1.07500700 | C | 1.60162400  | -2.85508400 | 3.33218000  |
| C                                   | -1.84180200 | 3.79217200  | -1.93634100 | H | 1.59428200  | -3.45751400 | 4.23629100  |
| H                                   | -1.05061000 | 4.27887000  | -2.50502900 | C | 2.16626900  | -1.58402400 | 3.33318200  |
| C                                   | -2.01773800 | 2.41833200  | -2.08548800 | H | 2.60187300  | -1.18587600 | 4.24769500  |
| C                                   | -1.14917400 | 1.66649200  | -3.04641800 | C | 2.16659400  | -0.79991000 | 2.17752200  |
| H                                   | -1.69072600 | 0.86086200  | -3.55380900 | H | 2.60483900  | 0.19754400  | 2.19670800  |
| C                                   | 1.48991600  | -0.45473400 | -0.25765800 | H | -5.06545500 | 2.39854900  | 1.30080000  |
| H                                   | 1.89482600  | -1.04407900 | -1.09064600 | H | -4.74530800 | 0.83532400  | 0.54516800  |
| C                                   | 1.54512400  | 1.98690200  | 0.16539300  | H | -0.74426600 | 2.33990100  | -3.80644700 |
|                                     |             |             |             | H | -0.29572800 | 1.19495300  | -2.53643600 |
|                                     |             |             |             | H | -0.39582700 | -2.74060100 | -4.34493900 |

|                                       |             |             |             |   |             |             |             |
|---------------------------------------|-------------|-------------|-------------|---|-------------|-------------|-------------|
| H                                     | -0.39894600 | -1.37777700 | -3.21364900 | C | -2.20878800 | 2.50060500  | -1.81211100 |
| H                                     | -2.82206900 | -4.07265000 | 1.77625800  | C | -2.70982200 | 1.21458700  | -2.39624300 |
| H                                     | -3.05723300 | -2.43842800 | 1.13449500  | H | -1.90188600 | 0.51356000  | -2.62600800 |
| C                                     | -2.41022700 | 6.03012100  | -0.94671700 | C | 1.07047400  | 4.34721900  | -1.11542400 |
| H                                     | -1.34381400 | 6.27518100  | -0.97074100 | H | 1.58951000  | 4.09008200  | -2.04531000 |
| H                                     | -2.88440800 | 6.58106900  | -1.76739100 | C | 2.74806300  | -0.43504800 | -2.02665200 |
| H                                     | -2.82501300 | 6.42058800  | -0.01324500 | C | 4.05875700  | -0.01761200 | -1.75501400 |
| C                                     | 0.47094300  | -6.44278800 | -1.09936200 | C | 4.43875900  | 1.42403500  | -1.88226400 |
| H                                     | 1.36301300  | -6.19140100 | -0.51302400 | H | 4.11080300  | 1.85233300  | -2.83595300 |
| H                                     | -0.01713400 | -7.28065800 | -0.59386200 | C | 4.97669800  | -0.97646400 | -1.32822900 |
| H                                     | 0.81705700  | -6.78876700 | -2.07691200 | H | 5.99435900  | -0.66403900 | -1.09803900 |
| H                                     | -4.39916900 | -0.00978000 | -3.12017100 | C | 4.62171600  | -2.31865000 | -1.17799100 |
| H                                     | -4.46019100 | -2.35377600 | -2.57370700 | C | 3.30923800  | -2.69601100 | -1.46369800 |
| C                                     | 0.13031900  | 1.03854700  | 4.59694200  | H | 3.00545800  | -3.73101800 | -1.31180600 |
| H                                     | 0.31044600  | 1.70120600  | 5.43773500  | C | 2.35326800  | -1.77353400 | -1.88887300 |
| H                                     | 0.89100200  | 0.99819500  | 3.82005900  | C | 0.93950000  | -2.20266200 | -2.13610800 |
| Br                                    | -2.71320700 | 0.15377600  | 2.25533300  | H | 0.77442200  | -2.47705900 | -3.18651500 |
| C                                     | -0.97920900 | 0.30389800  | 4.51102100  | C | -0.93717000 | -0.09557400 | 0.62883000  |
| H                                     | -1.74369800 | 0.36881700  | 5.28497500  | H | -1.32603700 | 0.19801700  | -0.35539100 |
| C                                     | -1.25964600 | -0.60902900 | 3.38363000  | C | 0.08266700  | -2.25617000 | 1.39355500  |
| H                                     | -0.40742800 | -0.74304000 | 2.71380400  | C | 1.44058800  | -1.92439700 | 1.31121200  |
| H                                     | -1.64277700 | -1.58419100 | 3.68875700  | H | 1.76417600  | -1.13075300 | 0.63928100  |
| <b>L<sub>1</sub>-TS18<sub>3</sub></b> |             |             |             | C | 2.39076800  | -2.60226700 | 2.06535500  |
| Cu                                    | 0.82546100  | 0.89671400  | 0.39079600  | H | 3.43655300  | -2.31339900 | 1.97645300  |
| N                                     | -0.89777900 | -1.56728500 | 0.64291100  | C | 2.00944200  | -3.63602400 | 2.91854000  |
| N                                     | 1.79402200  | 0.54677700  | -2.42997100 | H | 2.75085300  | -4.16300000 | 3.51308200  |
| N                                     | 0.10688700  | 1.90418000  | -2.29814900 | C | 0.66426300  | -3.99091100 | 2.99130500  |
| O                                     | -1.99875500 | -3.64824700 | -0.16639500 | H | 0.34861600  | -4.79828900 | 3.64745100  |
| O                                     | -2.92715800 | -1.61224000 | -0.73408700 | C | -0.28879600 | -3.30953700 | 2.24085800  |
| B                                     | -1.91374500 | -2.26850100 | -0.05018700 | H | -1.33813700 | -3.58625200 | 2.30259600  |
| C                                     | 0.99710000  | 1.20623200  | -1.56395000 | C | -3.01660600 | -3.90414400 | -1.16089800 |
| C                                     | 1.34576800  | 0.66540000  | -3.82783800 | C | -3.72234800 | -5.19869000 | -0.81490700 |
| H                                     | 2.19307700  | 0.85054700  | -4.49473300 | H | -3.03115600 | -6.04084000 | -0.90694600 |
| C                                     | 0.36749700  | 1.82877000  | -3.74517000 | H | -4.56268600 | -5.37669400 | -1.49469300 |
| H                                     | 0.80516200  | 2.77507100  | -4.09394700 | H | -4.10179700 | -5.18560300 | 0.20868500  |
| C                                     | -0.84317800 | 2.81802000  | -1.75411000 | C | -2.31998600 | -4.01262900 | -2.51106100 |
| C                                     | -0.38821200 | 4.01421000  | -1.17210500 | H | -1.85643100 | -3.05923400 | -2.78592200 |
| C                                     | -1.33603600 | 4.88004200  | -0.62686000 | H | -3.01601700 | -4.29874300 | -3.30612500 |
| H                                     | -0.99417600 | 5.80413200  | -0.16241800 | H | -1.53339700 | -4.76965500 | -2.45356100 |
| C                                     | -2.70278200 | 4.59554400  | -0.66087100 | C | -3.90314400 | -2.62556100 | -1.05888700 |
| C                                     | -3.11582600 | 3.40669700  | -1.25974900 | C | -4.61042500 | -2.23476400 | -2.34033800 |
| H                                     | -4.17550200 | 3.15521000  | -1.26918800 | H | -5.20528300 | -1.33056900 | -2.18150000 |
|                                       |             |             |             | H | -5.29031700 | -3.02918400 | -2.66690700 |
|                                       |             |             |             | H | -3.90013800 | -2.03492200 | -3.14602500 |

|    |             |             |             |    |             |             |             |
|----|-------------|-------------|-------------|----|-------------|-------------|-------------|
| C  | -4.88595700 | -2.68843500 | 0.10337900  |    |             |             |             |
| H  | -4.38383300 | -3.01162600 | 1.02104500  | Cu | 1.07238000  | 0.39450900  | 0.72290000  |
| H  | -5.71436500 | -3.37543600 | -0.09684300 | N  | -1.21238900 | -1.67359200 | 0.13102100  |
| H  | -5.29554400 | -1.69106500 | 0.28360100  | N  | 2.70141000  | 1.02178600  | -1.65004400 |
| C  | -1.84953100 | 0.49234800  | 1.64763400  | N  | 0.95751000  | 2.31447800  | -1.69634400 |
| C  | -2.01942000 | 1.88898200  | 1.68253400  | O  | -3.22407200 | -2.91933900 | -0.65812000 |
| H  | -1.45796800 | 2.50074300  | 0.97408000  | O  | -3.26157000 | -0.61271400 | -0.70386400 |
| C  | -2.85494100 | 2.49686200  | 2.60797600  | B  | -2.53299500 | -1.75211400 | -0.40631300 |
| H  | -2.95824100 | 3.58067600  | 2.60259300  | C  | 1.50398600  | 1.25263500  | -1.07913700 |
| C  | -3.54512100 | 1.72834300  | 3.54861700  | C  | 3.02617200  | 1.95735500  | -2.73844300 |
| H  | -4.19127300 | 2.20160000  | 4.28301100  | H  | 3.97058100  | 2.47335000  | -2.53231500 |
| C  | -3.38464700 | 0.34623700  | 3.53320000  | C  | 1.82129400  | 2.89716700  | -2.73786800 |
| H  | -3.91251400 | -0.26850300 | 4.25960800  | H  | 2.08768100  | 3.92689500  | -2.47436600 |
| C  | -2.55588800 | -0.26487500 | 2.59389200  | C  | -0.35326100 | 2.81234400  | -1.43170800 |
| H  | -2.44165500 | -1.34728100 | 2.59662700  | C  | -0.53236700 | 4.02537800  | -0.74989300 |
| H  | 5.51993600  | 1.55663700  | -1.79953800 | C  | -1.83953600 | 4.40519900  | -0.43134900 |
| H  | 3.96646300  | 2.02133900  | -1.09269800 | H  | -1.98995600 | 5.32680800  | 0.12966100  |
| H  | 0.68460200  | -3.07626800 | -1.52873300 | C  | -2.94545300 | 3.63653200  | -0.79239700 |
| H  | 0.22136200  | -1.41380600 | -1.88299100 | C  | -2.73015100 | 2.48683000  | -1.55329400 |
| H  | -3.28504600 | 1.38510600  | -3.31460300 | H  | -3.57686900 | 1.89023600  | -1.88293900 |
| H  | -3.36623700 | 0.70028700  | -1.68795800 | C  | -1.44888500 | 2.06288700  | -1.89496200 |
| H  | 1.21967000  | 5.41300600  | -0.92584000 | C  | -1.25312800 | 0.84418600  | -2.74615500 |
| H  | 1.57913400  | 3.79215800  | -0.31745900 | H  | -0.54620300 | 1.02920100  | -3.56326800 |
| C  | 5.62194500  | -3.33442500 | -0.71747000 | C  | 0.61897800  | 4.91477100  | -0.40106500 |
| H  | 6.03149600  | -3.90422300 | -1.55961200 | H  | 0.86964800  | 5.57359000  | -1.24313900 |
| H  | 6.46586500  | -2.86674100 | -0.20357700 | C  | 3.48339000  | -0.15008100 | -1.41883500 |
| H  | 5.16960500  | -4.06061200 | -0.03515800 | C  | 4.64410500  | -0.07072100 | -0.63455800 |
| C  | -3.70192300 | 5.54602900  | -0.07507300 | C  | 5.05657000  | 1.22235000  | -0.00954800 |
| H  | -4.12478600 | 6.20671600  | -0.84090500 | H  | 5.32909400  | 1.97007200  | -0.76450100 |
| H  | -4.53962600 | 5.01345000  | 0.38436300  | C  | 5.37641400  | -1.24065700 | -0.43552400 |
| H  | -3.24987400 | 6.18598500  | 0.68754800  | H  | 6.27183400  | -1.19561700 | 0.18361500  |
| H  | 0.86112600  | -0.26912500 | -4.14662200 | C  | 4.98508400  | -2.46366500 | -0.98543400 |
| H  | -0.56076500 | 1.66199100  | -4.30064800 | C  | 3.83792200  | -2.49709200 | -1.77932500 |
| C  | 0.53380800  | 0.23323300  | 3.73387700  | H  | 3.51901000  | -3.44043100 | -2.22120500 |
| H  | 0.05994000  | -0.74368600 | 3.75093300  | C  | 3.07655100  | -1.35201600 | -2.01659900 |
| H  | -0.11709900 | 1.08983200  | 3.57088900  | C  | 1.83732900  | -1.41547500 | -2.85580400 |
| Br | 2.70882800  | 1.93760700  | 1.45834100  | H  | 1.80941200  | -0.62370700 | -3.61325000 |
| C  | 1.86250400  | 0.38976300  | 3.94510100  | C  | -0.83685500 | -0.33907000 | 0.58162200  |
| H  | 2.49190600  | -0.49138600 | 4.05953600  | H  | -1.02804600 | 0.37608800  | -0.21830500 |
| C  | 2.49476300  | 1.65290900  | 3.83160300  | C  | -0.48117200 | -2.84701200 | 0.45874700  |
| H  | 1.89012000  | 2.54716900  | 3.94504600  | C  | 0.88433600  | -2.93865800 | 0.17884600  |
| H  | 3.54211300  | 1.76698000  | 4.09055900  | H  | 1.39699900  | -2.07607700 | -0.23896500 |
|    |             |             |             | C  | 1.59191400  | -4.10051600 | 0.46459800  |
|    |             |             |             | H  | 2.65630000  | -4.13957900 | 0.24011900  |

L<sub>1</sub>-19<sub>3</sub>



|   |             |             |             |                                       |             |             |             |
|---|-------------|-------------|-------------|---------------------------------------|-------------|-------------|-------------|
| H | -6.17726400 | 1.39117200  | -0.25967500 | C                                     | 0.69220300  | -2.18445700 | -0.02576300 |
| C | -0.31308000 | 3.54749000  | -0.77128800 | C                                     | -0.23816100 | -2.95896200 | -0.74730200 |
| C | -0.13464400 | 4.07485000  | 0.51313800  | H                                     | -0.61587000 | -2.57020500 | -1.69408000 |
| C | -1.20627500 | 3.94347400  | 1.54994200  | C                                     | -0.69297600 | -4.18053600 | -0.27465700 |
| H | -2.08703700 | 4.55931200  | 1.32924900  | H                                     | -1.41940900 | -4.74735200 | -0.85544900 |
| C | 1.09626100  | 4.65762400  | 0.81431700  | C                                     | -0.21898900 | -4.68870800 | 0.93849300  |
| H | 1.25806000  | 5.05377200  | 1.81527100  | H                                     | -0.56967700 | -5.64846700 | 1.30860600  |
| C | 2.13948200  | 4.69355400  | -0.10948400 | C                                     | 0.70593200  | -3.94349300 | 1.66398700  |
| C | 1.93260800  | 4.13008500  | -1.37097400 | H                                     | 1.08808100  | -4.32488200 | 2.60870600  |
| H | 2.74535700  | 4.12868200  | -2.09638200 | C                                     | 1.15394000  | -2.70898800 | 1.19328300  |
| C | 0.71688100  | 3.54923000  | -1.72344300 | H                                     | 1.88155100  | -2.14201100 | 1.77158800  |
| C | 0.53032400  | 2.88633900  | -3.05315000 | H                                     | -0.83504600 | 4.24108100  | 2.53362400  |
| H | -0.41670300 | 3.16491200  | -3.52944500 | H                                     | -1.54900600 | 2.90280200  | 1.62323600  |
| C | 1.10894700  | -0.85713800 | -0.54775200 | H                                     | 1.34512900  | 3.13360900  | -3.73749900 |
| H | 1.32404100  | -0.97549300 | -1.61911600 | H                                     | 0.50976600  | 1.79319600  | -2.93865600 |
| C | 2.24674700  | 0.59475900  | 1.12332700  | H                                     | -2.02244300 | -1.16255600 | -4.11341100 |
| C | 1.10221600  | 0.63802300  | 1.93733100  | H                                     | -1.00732500 | -0.56210400 | -2.79532300 |
| H | 0.31025100  | -0.09107500 | 1.78358500  | H                                     | -5.87699800 | 0.36538200  | 1.14105900  |
| C | 0.99123000  | 1.56572600  | 2.96842600  | H                                     | -4.66646300 | 1.55236500  | 0.65193400  |
| H | 0.09042200  | 1.56490600  | 3.57898700  | C                                     | 3.47061200  | 5.27421200  | 0.25443500  |
| C | 2.02202300  | 2.46523600  | 3.22499600  | H                                     | 3.80756800  | 6.01428400  | -0.47886900 |
| H | 1.93754500  | 3.18829300  | 4.03256400  | H                                     | 3.44559500  | 5.75708300  | 1.23490600  |
| C | 3.16560200  | 2.42287600  | 2.42803000  | H                                     | 4.23912100  | 4.49372600  | 0.29396600  |
| H | 3.97846400  | 3.12395900  | 2.60778200  | C                                     | -5.07053000 | -3.93323500 | -1.27026900 |
| C | 3.27901500  | 1.50951700  | 1.38675700  | H                                     | -4.81266000 | -4.51352400 | -2.16017600 |
| H | 4.16953400  | 1.49335500  | 0.76599400  | H                                     | -4.57715600 | -4.41392300 | -0.41571700 |
| C | 5.73354100  | -1.59896800 | -0.38483700 | H                                     | -6.14871200 | -4.01870800 | -1.10684700 |
| C | 6.75181100  | -2.20397300 | 0.55997800  | H                                     | -2.53356700 | 4.42977100  | -2.28651000 |
| H | 7.33266800  | -1.41419500 | 1.04406300  | H                                     | -3.81016700 | 2.52141200  | -2.99110700 |
| H | 7.44931100  | -2.84992800 | 0.01534200  | C                                     | -2.39790300 | -1.73505500 | 1.52023800  |
| H | 6.27163700  | -2.79522100 | 1.34232300  | Br                                    | -2.58336400 | 0.04992500  | 2.37386100  |
| C | 6.40109900  | -0.61452300 | -1.33560700 | C                                     | -3.45328700 | -2.64393200 | 2.01364300  |
| H | 5.67449600  | -0.19652400 | -2.03897100 | C                                     | -3.20038200 | -3.80848600 | 2.61177000  |
| H | 7.20371800  | -1.08738300 | -1.91037100 | H                                     | -4.00161300 | -4.46498900 | 2.93788100  |
| H | 6.83068700  | 0.20947800  | -0.75971100 | H                                     | -2.17934200 | -4.14353400 | 2.77881800  |
| C | 4.83763800  | -2.63486300 | -1.13195100 | H                                     | -4.48111700 | -2.32043500 | 1.84843000  |
| C | 5.36051600  | -3.06645200 | -2.48643700 | H                                     | -2.46985400 | -1.51824100 | 0.44910700  |
| H | 4.67129000  | -3.78178400 | -2.94282900 | H                                     | -1.38808900 | -2.08140100 | 1.75222700  |
| H | 6.33649600  | -3.55425500 | -2.38899600 |                                       |             |             |             |
| H | 5.46394800  | -2.21746200 | -3.16521600 |                                       |             |             |             |
| C | 4.50223500  | -3.84625900 | -0.27163900 |                                       |             |             |             |
| H | 4.15664000  | -3.53866400 | 0.72023300  |                                       |             |             |             |
| H | 5.36360900  | -4.51077600 | -0.14944100 |                                       |             |             |             |
| H | 3.69144100  | -4.40888500 | -0.74228700 |                                       |             |             |             |
|   |             |             |             | <b>L<sub>1</sub>-TS18<sub>4</sub></b> |             |             |             |
|   |             |             |             | N                                     | -1.82654800 | 0.75963200  | 0.47682600  |
|   |             |             |             | N                                     | 0.43363500  | -2.55071600 | -1.40536400 |
|   |             |             |             | N                                     | 2.40726100  | -1.70755700 | -1.72163400 |

|   |             |             |             |   |             |             |             |
|---|-------------|-------------|-------------|---|-------------|-------------|-------------|
| O | -4.30135800 | 1.04163500  | 0.22218400  | H | -3.76575700 | -0.86044200 | 1.37515900  |
| O | -2.91792100 | 1.71538100  | -1.49273500 | C | -5.15080800 | 1.34279600  | -0.90717200 |
| B | -2.99859200 | 1.14691200  | -0.23061200 | C | -6.41281600 | 2.01071900  | -0.40210700 |
| C | 1.26367200  | -1.56933400 | -1.01649300 | H | -6.99136700 | 1.31011100  | 0.20606700  |
| C | 1.05992200  | -3.50607200 | -2.33683100 | H | -7.04412400 | 2.33165600  | -1.23782700 |
| H | 1.24725200  | -4.45817300 | -1.82133700 | H | -6.18510000 | 2.88200700  | 0.21456600  |
| C | 2.34417100  | -2.78349100 | -2.72591600 | C | -5.47574400 | 0.01928200  | -1.58678800 |
| H | 3.23305900  | -3.42065900 | -2.67487300 | H | -4.56730400 | -0.44019100 | -1.99004300 |
| C | 3.44759000  | -0.73361200 | -1.71501900 | H | -6.19422800 | 0.14246800  | -2.40323700 |
| C | 4.67127600  | -1.04268800 | -1.10565100 | H | -5.90276400 | -0.66886600 | -0.85071700 |
| C | 5.65752100  | -0.05386800 | -1.07803300 | C | -4.22929200 | 2.25095400  | -1.77906000 |
| H | 6.60709300  | -0.27520100 | -0.59260600 | C | -4.47659800 | 2.16197900  | -3.27087900 |
| C | 5.45319200  | 1.20974500  | -1.63539200 | H | -3.78717200 | 2.82085800  | -3.80541300 |
| C | 4.23196800  | 1.46949900  | -2.26280500 | H | -5.49765200 | 2.47431700  | -3.51510400 |
| H | 4.06212200  | 2.44339100  | -2.72092200 | H | -4.32758100 | 1.14527400  | -3.64202500 |
| C | 3.21965800  | 0.51205400  | -2.32347000 | C | -4.23029200 | 3.70120900  | -1.31494800 |
| C | 1.92967400  | 0.79319600  | -3.03146000 | H | -4.08906500 | 3.76783000  | -0.23188600 |
| H | 1.08469500  | 0.82763900  | -2.33395200 | H | -5.16423700 | 4.21108100  | -1.57237900 |
| C | 4.91103900  | -2.39182100 | -0.50618900 | H | -3.40306900 | 4.23203900  | -1.79281700 |
| H | 5.16360100  | -3.13364900 | -1.27484100 | C | -0.23874700 | 2.64850700  | 0.35235900  |
| C | -0.82312500 | -2.85496700 | -0.79820600 | C | 0.75177400  | 3.37986400  | -0.34288700 |
| C | -0.84638200 | -3.55577100 | 0.41684200  | H | 1.23896700  | 2.91275000  | -1.19997500 |
| C | 0.41704200  | -3.84780300 | 1.16223300  | C | 1.10865600  | 4.66545400  | 0.03681000  |
| H | 0.24033300  | -4.55757000 | 1.97383400  | H | 1.87966600  | 5.19493800  | -0.51844400 |
| C | -2.08714700 | -3.93325200 | 0.92889200  | C | 0.48117200  | 5.28250000  | 1.12025100  |
| H | -2.12238900 | -4.46358100 | 1.87969700  | H | 0.75652500  | 6.29064400  | 1.41638900  |
| C | -3.27878000 | -3.62262300 | 0.27520300  | C | -0.52069800 | 4.59099200  | 1.80210200  |
| C | -3.21593100 | -2.90442900 | -0.91985700 | H | -1.03315300 | 5.06514800  | 2.63627700  |
| H | -4.13959000 | -2.64851300 | -1.43759700 | C | -0.86908500 | 3.29535200  | 1.43585700  |
| C | -2.00035100 | -2.49731500 | -1.46947900 | H | -1.65231000 | 2.77107700  | 1.97903900  |
| C | -1.96402100 | -1.64781400 | -2.70349700 | H | 0.83265500  | -2.93217300 | 1.60505100  |
| H | -1.09020300 | -1.84811400 | -3.33075200 | H | 1.20440100  | -4.25556100 | 0.51729000  |
| C | -0.54966900 | 1.26938800  | -0.05013300 | H | -2.86232100 | -1.79098100 | -3.31149700 |
| H | -0.60113900 | 1.21817200  | -1.14305000 | H | -1.91969800 | -0.58288400 | -2.43509300 |
| C | -1.82592400 | 0.02653400  | 1.67725700  | H | 1.68920100  | 0.01086100  | -3.76100400 |
| C | -0.72223400 | 0.07755800  | 2.54824600  | H | 1.97011300  | 1.74781100  | -3.56169600 |
| H | 0.09856000  | 0.76460700  | 2.34755100  | H | 5.74077200  | -2.36559400 | 0.20358900  |
| C | -0.67589500 | -0.71722600 | 3.69138800  | H | 4.02368600  | -2.74651300 | 0.02577100  |
| H | 0.20969900  | -0.67337600 | 4.31984900  | C | -4.60234100 | -3.98444100 | 0.87387000  |
| C | -1.74080000 | -1.54705500 | 4.02163700  | H | -5.32406800 | -4.29946900 | 0.11403100  |
| H | -1.70704100 | -2.16236000 | 4.91621400  | H | -4.51056200 | -4.78684700 | 1.61088000  |
| C | -2.85988900 | -1.56386700 | 3.18930300  | H | -5.04319100 | -3.12232200 | 1.39116700  |
| H | -3.70508900 | -2.20679600 | 3.42942700  | C | 6.49989700  | 2.27589400  | -1.52834600 |
| C | -2.90504700 | -0.79982300 | 2.03167300  | H | 6.29628200  | 2.94125100  | -0.68065200 |

|    |            |             |             |
|----|------------|-------------|-------------|
| H  | 7.49582800 | 1.85319000  | -1.37319200 |
| H  | 6.53286900 | 2.90512000  | -2.42222800 |
| H  | 0.39850600 | -3.71191000 | -3.18478100 |
| H  | 2.29805400 | -2.35266500 | -3.73629900 |
| Cu | 0.90679300 | -0.14359900 | 0.30368500  |
| Br | 2.75335100 | -0.92067300 | 2.03260000  |
| C  | 2.42758100 | 2.97186200  | 2.99589900  |
| H  | 1.44379000 | 3.16057000  | 2.57317700  |
| H  | 2.67225300 | 3.46803400  | 3.92986400  |
| C  | 3.30470400 | 2.14256600  | 2.38751300  |
| H  | 4.27411800 | 1.94798000  | 2.84418000  |
| C  | 3.02051600 | 1.48941200  | 1.15883600  |
| H  | 2.10485300 | 1.76039900  | 0.63954200  |
| H  | 3.81722000 | 1.07066200  | 0.55515800  |

**L<sub>1</sub>-19<sub>4</sub>**

|    |             |             |             |
|----|-------------|-------------|-------------|
| Cu | 1.38960800  | -0.28284500 | 0.61400900  |
| N  | -1.24409100 | 0.69381000  | 0.52243800  |
| N  | 0.09595300  | -2.52450400 | -1.30593400 |
| N  | 1.96578700  | -1.56276800 | -1.84251700 |
| O  | -3.60567600 | 1.43696200  | 0.20124500  |
| O  | -2.02718100 | 2.05231400  | -1.36271400 |
| B  | -2.29072000 | 1.35102200  | -0.19816800 |
| C  | 0.92263100  | -1.51652300 | -0.98309700 |
| C  | 0.64323300  | -3.39496700 | -2.36948300 |
| H  | 0.92313100  | -4.36371900 | -1.93693600 |
| C  | 1.84333600  | -2.60567200 | -2.87005600 |
| H  | 2.75790800  | -3.20408100 | -2.92845500 |
| C  | 2.98345600  | -0.56140100 | -1.87729200 |
| C  | 4.28010500  | -0.88221700 | -1.44241600 |
| C  | 5.22581100  | 0.14280400  | -1.38524800 |
| H  | 6.22580400  | -0.09064700 | -1.02235500 |
| C  | 4.92188400  | 1.45303100  | -1.75424500 |
| C  | 3.64608900  | 1.71832100  | -2.25408000 |
| H  | 3.40474900  | 2.72527600  | -2.59479500 |
| C  | 2.66561800  | 0.72917600  | -2.34249200 |
| C  | 1.35427000  | 1.04587200  | -2.99949600 |
| H  | 0.54974000  | 0.37379500  | -2.69488500 |
| C  | 4.65701700  | -2.28352700 | -1.07871200 |
| H  | 5.01400000  | -2.83102200 | -1.96113000 |
| C  | -1.26317800 | -2.72983600 | -0.90857600 |
| C  | -1.57662900 | -3.65000100 | 0.09896200  |
| C  | -0.50838700 | -4.32031900 | 0.89758500  |

|   |             |             |             |
|---|-------------|-------------|-------------|
| H | 0.04223100  | -5.06003300 | 0.30284000  |
| C | -2.92628700 | -3.91429100 | 0.34417300  |
| H | -3.18153200 | -4.60964800 | 1.14293800  |
| C | -3.94695900 | -3.29718800 | -0.37480300 |
| C | -3.59554900 | -2.40296600 | -1.38874800 |
| H | -4.37889500 | -1.92964600 | -1.97936600 |
| C | -2.26382000 | -2.10539200 | -1.67299000 |
| C | -1.91605300 | -1.14938500 | -2.77297000 |
| H | -1.07324200 | -1.49850300 | -3.38057700 |
| C | 0.08190000  | 1.26540500  | 0.27546600  |
| H | 0.23664700  | 1.31627900  | -0.80171400 |
| C | -1.49501300 | -0.10461500 | 1.66127100  |
| C | -0.58778300 | -0.16276400 | 2.72756300  |
| H | 0.29508600  | 0.46927600  | 2.72333200  |
| C | -0.82306900 | -0.99961800 | 3.81454700  |
| H | -0.08549900 | -1.03960900 | 4.61237200  |
| C | -1.97838900 | -1.77069700 | 3.87916400  |
| H | -2.16126500 | -2.42297700 | 4.72827900  |
| C | -2.89676500 | -1.69238600 | 2.83362700  |
| H | -3.80305600 | -2.29436600 | 2.85625600  |
| C | -2.66034500 | -0.88030400 | 1.73320200  |
| H | -3.36530300 | -0.86694000 | 0.90793200  |
| C | -4.31891800 | 2.10374900  | -0.86709100 |
| C | -5.40538800 | 2.96394600  | -0.25530200 |
| H | -6.15247100 | 2.33212100  | 0.23215200  |
| H | -5.91427100 | 3.55374100  | -1.02538800 |
| H | -5.00106500 | 3.64674500  | 0.49385000  |
| C | -4.92325800 | 1.01775700  | -1.74439100 |
| H | -4.13813900 | 0.41918400  | -2.21622200 |
| H | -5.56166700 | 1.43404100  | -2.53001300 |
| H | -5.52762000 | 0.34978400  | -1.12325300 |
| C | -3.18025900 | 2.89943400  | -1.58432700 |
| C | -3.37087000 | 3.07660100  | -3.07620800 |
| H | -2.52812500 | 3.63158500  | -3.49729200 |
| H | -4.28477000 | 3.64195800  | -3.28740800 |
| H | -3.43144200 | 2.11508200  | -3.59136500 |
| C | -2.88208500 | 4.23238200  | -0.91132500 |
| H | -2.73189500 | 4.10369500  | 0.16545600  |
| H | -3.68771800 | 4.95637100  | -1.06756300 |
| H | -1.95957100 | 4.64862500  | -1.32485700 |
| C | 0.27061500  | 2.60837900  | 0.85734200  |
| C | 1.16335100  | 3.51034300  | 0.24956900  |
| H | 1.73487700  | 3.17313500  | -0.61597000 |
| C | 1.31006000  | 4.80807900  | 0.71913900  |



|                          |             |             |             |                        |             |             |             |
|--------------------------|-------------|-------------|-------------|------------------------|-------------|-------------|-------------|
| H                        | 1.99969800  | 5.48685700  | 0.22355600  | C                      | -3.10287900 | -0.60829800 | 1.23001400  |
| C                        | 0.56273000  | 5.24663100  | 1.81391700  | C                      | -4.44065400 | -0.20406200 | 1.20146200  |
| H                        | 0.67201000  | 6.26397400  | 2.17928600  | C                      | -5.12304300 | 0.01230700  | -0.00003100 |
| C                        | -0.32783200 | 4.37002600  | 2.42623100  | C                      | -4.43737200 | -0.19618700 | -1.20096400 |
| H                        | -0.91758400 | 4.70008000  | 3.27748900  | H                      | -4.95931000 | -0.04898900 | 2.14434700  |
| C                        | -0.47090100 | 3.06593900  | 1.95988400  | H                      | -4.95347500 | -0.03501100 | -2.14422100 |
| H                        | -1.18527900 | 2.40086300  | 2.43800800  | C                      | 3.10657400  | -0.60424600 | -1.22670100 |
| H                        | -0.93505600 | -4.84236700 | 1.75735900  | C                      | 4.44268800  | -0.19166200 | -1.19901300 |
| H                        | 0.23508900  | -3.60332100 | 1.26083100  | C                      | 5.12329400  | 0.03211900  | 0.00115600  |
| H                        | -2.76730100 | -0.99717000 | -3.44307700 | C                      | 4.43453200  | -0.16509800 | 1.20322500  |
| H                        | -1.63126900 | -0.16480000 | -2.38023100 | C                      | 3.09999300  | -0.57738400 | 1.23180800  |
| H                        | 1.44626400  | 0.96512200  | -4.08991800 | C                      | 2.45602100  | -0.79349100 | 0.00214800  |
| H                        | 1.02747500  | 2.06849700  | -2.78449300 | H                      | 4.95976700  | -0.03406700 | -2.14219300 |
| H                        | 5.46496300  | -2.29409000 | -0.34361500 | H                      | 4.94568200  | 0.01405300  | 2.14604800  |
| H                        | 3.81629000  | -2.82865000 | -0.64441600 | Cu                     | -0.00406800 | 1.50087600  | -0.00548900 |
| C                        | -5.38575400 | -3.53859300 | -0.03694100 | H                      | -1.38442900 | -3.37540200 | 0.00803800  |
| H                        | -6.00738900 | -3.63612700 | -0.93231800 | H                      | 1.39720100  | -3.37036100 | 0.00974300  |
| H                        | -5.51566400 | -4.44061800 | 0.56680800  | C                      | -6.55600100 | 0.48870400  | -0.00030800 |
| H                        | -5.79609100 | -2.70035900 | 0.54106700  | H                      | -7.09684000 | 0.13405200  | 0.88204200  |
| C                        | 5.92567600  | 2.55218600  | -1.59478300 | H                      | -6.60196400 | 1.58455500  | 0.00723100  |
| H                        | 5.82418000  | 3.31334300  | -2.37357200 | H                      | -7.09242800 | 0.14634600  | -0.89014000 |
| H                        | 5.79388900  | 3.06079800  | -0.63234700 | C                      | 6.57229200  | 0.45782300  | 0.00560000  |
| H                        | 6.95101900  | 2.17408000  | -1.61920900 | H                      | 7.23368900  | -0.39412100 | 0.20674800  |
| H                        | -0.11466700 | -3.57549900 | -3.13863000 | H                      | 6.86693300  | 0.88299400  | -0.95761300 |
| H                        | 1.67743300  | -2.14306600 | -3.85409400 | H                      | 6.76460900  | 1.20680300  | 0.77994300  |
| C                        | 2.76762100  | 0.93568900  | 1.46744000  | C                      | -2.38562300 | -0.80849600 | 2.54325200  |
| Br                       | 2.46322800  | -2.21237100 | 1.70230600  | H                      | -1.93529700 | -1.80427600 | 2.61707600  |
| C                        | 2.60970300  | 1.10716200  | 2.89265500  | H                      | -1.57687600 | -0.07929500 | 2.66357300  |
| C                        | 2.30125900  | 2.27214300  | 3.49634100  | H                      | -3.07561700 | -0.68668400 | 3.38137500  |
| H                        | 2.17738100  | 2.33912400  | 4.57332600  | C                      | -2.37877800 | -0.79141200 | -2.54132000 |
| H                        | 2.18961800  | 3.19376700  | 2.92891000  | H                      | -1.91706400 | -1.78187800 | -2.61542300 |
| H                        | 2.72448100  | 0.20382400  | 3.49533300  | H                      | -3.06929500 | -0.67653900 | -3.38001100 |
| H                        | 3.58000100  | 0.26296000  | 1.18074300  | H                      | -1.57835500 | -0.05276800 | -2.66015300 |
| H                        | 2.75799100  | 1.85930800  | 0.88704200  | C                      | 2.37541900  | -0.75542200 | 2.54420900  |
| <b>L<sub>2</sub>CuCl</b> |             |             |             | H                      | 3.06234300  | -0.62694800 | 3.38387400  |
| C                        | 0.00105600  | -0.39087900 | -0.00026700 | H                      | 1.57075200  | -0.01957700 | 2.65106300  |
| C                        | 0.68331400  | -2.56224000 | 0.00684400  | H                      | 1.91855100  | -1.74733200 | 2.62861900  |
| C                        | -0.67348000 | -2.56468800 | 0.00610200  | C                      | 2.39049600  | -0.80922700 | -2.53984700 |
| N                        | -1.07424200 | -1.23254600 | 0.00178500  | H                      | 1.93786700  | -1.80424300 | -2.60906700 |
| N                        | 1.07934200  | -1.22866800 | 0.00285100  | H                      | 1.58368700  | -0.07863900 | -2.66496600 |
| C                        | -3.09944700 | -0.60030400 | -1.22862200 | H                      | 3.08185100  | -0.69346700 | -3.37771400 |
| C                        | -2.45212700 | -0.80121200 | 0.00091100  | Cl                     | -0.01278700 | 3.62611900  | -0.01055500 |
|                          |             |             |             | <b>L<sub>2</sub>-1</b> |             |             |             |

C 0.06594900 -1.17098600 -0.31734900  
 C -0.59135700 -1.93220600 -2.34911300  
 C 0.76605600 -1.88382800 -2.35254400  
 N 1.15122900 -1.41558500 -1.10200900  
 N -1.00287100 -1.49196400 -1.09684300  
 C 3.24003500 -2.20871900 -0.09335500  
 C 2.51514900 -1.16725900 -0.69589000  
 C 3.06534400 0.10636600 -0.91772900  
 C 4.38705000 0.31466900 -0.50617400  
 C 5.14302000 -0.68861500 0.10713200  
 C 4.55478300 -1.94395500 0.29836100  
 H 4.83314200 1.29218900 -0.67159100  
 H 5.13147000 -2.73808300 0.76636200  
 C -3.01969100 -2.42618800 -0.06304200  
 C -4.34661200 -2.25442400 0.34057400  
 C -5.02896200 -1.05014100 0.13698800  
 C -4.35297300 0.00086800 -0.49027500  
 C -3.02415200 -0.11386300 -0.91435300  
 C -2.37971800 -1.34172100 -0.68503700  
 H -4.85622100 -3.08110000 0.82939200  
 H -4.86936200 0.94341200 -0.65471400  
 Cu 0.04462200 -0.43354900 1.42371000  
 H 1.48546100 -2.12824900 -3.11758700  
 H -1.29542200 -2.22743000 -3.11046800  
 C 6.55366800 -0.41817100 0.57379700  
 H 7.03901300 0.34614300 -0.03998600  
 H 6.55966300 -0.05677800 1.60946400  
 H 7.16746900 -1.32321900 0.54112500  
 C -6.47154300 -0.89683900 0.55742300  
 H -7.14981800 -1.10286200 -0.28003500  
 H -6.72888900 -1.58828200 1.36471400  
 H -6.68046900 0.12054900 0.90104100  
 C 2.27791300 1.22120800 -1.56241000  
 H 1.72726600 0.87472400 -2.44274000  
 H 1.54320400 1.67004200 -0.87942400  
 H 2.95102400 2.02031400 -1.88307000  
 C 2.62511400 -3.56859600 0.13869600  
 H 2.25583900 -4.01517800 -0.79101300  
 H 3.35763000 -4.25304900 0.57275700  
 H 1.77299000 -3.50792800 0.82493300  
 C -2.32663400 1.05173400 -1.57230600  
 H -3.06200900 1.78503900 -1.91336900  
 H -1.64032900 1.57377700 -0.88954200

H -1.74093000 0.73648800 -2.44167000  
 C -2.30303400 -3.73312600 0.18119000  
 H -1.91822300 -4.16784500 -0.74795400  
 H -1.44615900 -3.59896700 0.85073100  
 H -2.97636900 -4.46143900 0.63901100  
 Cl 0.00863700 0.66071800 3.29505700  
 O -0.17587700 3.21059500 0.31513100  
 C -0.27809200 4.44012700 -0.32335800  
 C -0.05797700 4.28072400 -1.84703700  
 H -0.79516200 3.58715100 -2.26552100  
 H -0.14628000 5.23497800 -2.38128900  
 H 0.93925800 3.87295600 -2.04385100  
 C -1.68218200 5.04443400 -0.08464500  
 H -1.85065700 5.18082100 0.99033400  
 H -1.81563800 6.01621300 -0.57717100  
 H -2.45147500 4.36058000 -0.46000700  
 C 0.78876700 5.41421700 0.23031000  
 H 1.78804600 4.98730200 0.08920400  
 H 0.76172500 6.39770000 -0.25635500  
 H 0.63439700 5.56309500 1.30612500  
 Li -0.10535600 2.41382400 1.79679300

**L<sub>2</sub>-TS2**

C -0.05034900 -0.94421500 -0.31700800  
 C -0.74308900 -2.25879100 -2.03982200  
 C 0.60947600 -2.34164500 -1.98722400  
 N 1.01804700 -1.53372000 -0.92950500  
 N -1.13060400 -1.40457300 -1.01287000  
 C 2.87715600 -2.05242400 0.58724300  
 C 2.39456400 -1.35847800 -0.53476000  
 C 3.21711300 -0.51775300 -1.30357300  
 C 4.54998100 -0.37023900 -0.90837300  
 C 5.06738700 -1.02851000 0.21177600  
 C 4.21816400 -1.86788700 0.93902200  
 H 5.19708800 0.28177200 -1.48998400  
 H 4.60694300 -2.39820900 1.80497800  
 C -3.24078600 -2.01402700 0.06789700  
 C -4.57287600 -1.70886400 0.35627600  
 C -5.17191900 -0.52580900 -0.09143100  
 C -4.40182500 0.36618500 -0.84186900  
 C -3.06210800 0.11124200 -1.16164500  
 C -2.50534300 -1.09105600 -0.69696800  
 H -5.15293400 -2.40904200 0.95261900

|    |             |             |             |                        |             |             |             |
|----|-------------|-------------|-------------|------------------------|-------------|-------------|-------------|
| H  | -4.85001200 | 1.29297700  | -1.19196800 |                        |             |             |             |
| Cu | -0.13563100 | 0.21590100  | 1.18790800  | <b>L<sub>2</sub>-3</b> |             |             |             |
| H  | 1.31294600  | -2.89274300 | -2.59033000 |                        |             |             |             |
| H  | -1.45928600 | -2.71634600 | -2.70332500 | C                      | 0.23107700  | -0.86238000 | 0.00823000  |
| C  | 6.50072100  | -0.81909600 | 0.63895500  | C                      | 1.11551300  | -2.96311900 | 0.05442800  |
| H  | 7.15130300  | -0.62758500 | -0.21958500 | C                      | -0.23442200 | -3.09360400 | 0.05918300  |
| H  | 6.58625600  | 0.04339700  | 1.31129500  | N                      | -0.75977100 | -1.80478400 | 0.03070400  |
| H  | 6.89013400  | -1.68963300 | 1.17489200  | N                      | 1.38406200  | -1.59802600 | 0.02320200  |
| C  | -6.62329400 | -0.23457600 | 0.20934800  | C                      | -2.84272300 | -1.44296700 | -1.20940000 |
| H  | -7.28029200 | -0.67618100 | -0.55056500 | C                      | -2.17163200 | -1.50914100 | 0.02195200  |
| H  | -6.92169300 | -0.64914200 | 1.17690100  | C                      | -2.83253400 | -1.30842900 | 1.24468500  |
| H  | -6.81984800 | 0.84121400  | 0.22493500  | C                      | -4.20359800 | -1.03773000 | 1.20755700  |
| C  | 2.69291300  | 0.20433500  | -2.52159500 | C                      | -4.91209200 | -0.96644800 | 0.00348200  |
| H  | 2.50410500  | -0.48502800 | -3.35319300 | C                      | -4.21411100 | -1.17015300 | -1.19106000 |
| H  | 1.75193700  | 0.71855100  | -2.30766400 | H                      | -4.72858400 | -0.87314600 | 2.14544200  |
| H  | 3.41386700  | 0.94899900  | -2.86639600 | H                      | -4.74677600 | -1.10854700 | -2.13691200 |
| C  | 1.99505300  | -2.97111600 | 1.39856900  | C                      | 3.33260700  | -0.78333700 | -1.22345100 |
| H  | 1.42190600  | -3.65159500 | 0.76032300  | C                      | 4.62394600  | -0.24838200 | -1.20682000 |
| H  | 2.59704800  | -3.57321100 | 2.08353200  | C                      | 5.29275200  | 0.03376900  | -0.01145900 |
| H  | 1.27304800  | -2.40289100 | 1.99565400  | C                      | 4.63626500  | -0.22760400 | 1.19535500  |
| C  | -2.25555000 | 1.12220000  | -1.93518600 | C                      | 3.34507600  | -0.76175100 | 1.23432200  |
| H  | -2.91783200 | 1.80807500  | -2.47077400 | C                      | 2.71287100  | -1.03577500 | 0.01094500  |
| H  | -1.62476100 | 1.71761700  | -1.25832700 | H                      | 5.11497100  | -0.03998300 | -2.15425800 |
| H  | -1.59761700 | 0.64482500  | -2.66802100 | H                      | 5.13676200  | -0.00249200 | 2.13396500  |
| C  | -2.61348600 | -3.28410600 | 0.59156600  | Cu                     | 0.06417100  | 1.00568100  | -0.02435700 |
| H  | -2.25913500 | -3.93323900 | -0.21685900 | H                      | -0.86578200 | -3.96745600 | 0.08043600  |
| H  | -1.75000600 | -3.06287500 | 1.22824700  | H                      | 1.90239800  | -3.70022700 | 0.07010200  |
| H  | -3.33375700 | -3.85168600 | 1.18535500  | C                      | -6.39854300 | -0.69912100 | -0.00319000 |
| Cl | -0.55877200 | 0.97358300  | 3.23523300  | H                      | -6.96779300 | -1.63041500 | 0.10956100  |
| O  | -0.33618000 | 2.88967700  | 0.29434100  | H                      | -6.68867900 | -0.03915800 | 0.81962300  |
| C  | 0.54103700  | 3.77499000  | -0.33484700 | H                      | -6.71648300 | -0.23341000 | -0.94029100 |
| C  | 0.35410900  | 3.72566100  | -1.86827900 | C                      | 6.69834100  | 0.58641500  | -0.02364000 |
| H  | -0.67543500 | 3.99191500  | -2.13048700 | H                      | 7.44072100  | -0.22170100 | -0.02898200 |
| H  | 1.03062000  | 4.41270800  | -2.39155700 | H                      | 6.87837600  | 1.19977000  | -0.91125100 |
| H  | 0.54344300  | 2.71254300  | -2.23896500 | H                      | 6.89303500  | 1.20181100  | 0.85940700  |
| C  | 0.26142900  | 5.22121700  | 0.14321400  | C                      | -2.09046000 | -1.35377900 | 2.55838600  |
| H  | 0.41050000  | 5.29385500  | 1.22910400  | H                      | -1.52303000 | -2.28326200 | 2.67521600  |
| H  | 0.91759100  | 5.96182200  | -0.33154200 | H                      | -1.37450100 | -0.52761100 | 2.63106500  |
| H  | -0.77724300 | 5.49208600  | -0.07831000 | H                      | -2.78592600 | -1.27331400 | 3.39714400  |
| C  | 2.00357000  | 3.41179200  | 0.01048800  | C                      | -2.11104000 | -1.63141700 | -2.51628800 |
| H  | 2.21629100  | 2.38272200  | -0.29701300 | H                      | -1.35947000 | -0.84766700 | -2.66100300 |
| H  | 2.72938800  | 4.07637000  | -0.47584800 | H                      | -1.58603400 | -2.59200100 | -2.55670200 |
| H  | 2.15872400  | 3.47207800  | 1.09414200  | H                      | -2.80738400 | -1.59171100 | -3.35721300 |
| Li | -0.87860400 | 2.75676400  | 1.91056000  | C                      | 2.64954800  | -1.00301400 | 2.55221500  |

|                        |             |             |             |    |             |             |             |
|------------------------|-------------|-------------|-------------|----|-------------|-------------|-------------|
| H                      | 1.77639400  | -0.34965600 | 2.65758600  | H  | -2.96048100 | 2.93825000  | 2.42968400  |
| H                      | 2.29335500  | -2.03466500 | 2.64495500  | Cu | 0.84674700  | 0.07949800  | -0.29619700 |
| H                      | 3.32485000  | -0.80180800 | 3.38718300  | H  | 4.43114000  | 3.43869600  | 0.98571700  |
| C                      | 2.62426500  | -1.04856700 | -2.52981700 | H  | 1.99879900  | 4.75534200  | 1.26905400  |
| H                      | 2.25788600  | -2.07871900 | -2.59525800 | C  | 7.14304100  | -2.13991100 | -0.70430700 |
| H                      | 1.75639600  | -0.38949700 | -2.64331600 | H  | 7.77263400  | -1.86890800 | -1.55708100 |
| H                      | 3.29457800  | -0.87308500 | -3.37454800 | H  | 7.79245900  | -2.30575400 | 0.16020800  |
| O                      | 0.06958400  | 2.80495200  | -0.04850900 | H  | 6.66635300  | -3.09852100 | -0.94310500 |
| C                      | -1.00366500 | 3.70620200  | -0.03335700 | C  | -4.26969500 | 4.47547600  | 0.59243500  |
| C                      | -1.89607800 | 3.51404300  | -1.27889700 | H  | -4.38416400 | 5.46892300  | 0.14794600  |
| H                      | -1.29166200 | 3.62011000  | -2.18602900 | H  | -4.89900400 | 3.78659600  | 0.01624200  |
| H                      | -2.33115300 | 2.50750500  | -1.27573000 | H  | -4.66919300 | 4.50969400  | 1.61009000  |
| H                      | -2.71598400 | 4.24273400  | -1.32140800 | C  | 4.18117500  | 0.31084800  | 2.57820200  |
| C                      | -0.40563400 | 5.12851700  | -0.04766600 | H  | 4.44961600  | 1.30754600  | 2.94718500  |
| H                      | -1.18065300 | 5.90467300  | -0.03892700 | H  | 3.09286000  | 0.22337000  | 2.65429100  |
| H                      | 0.23751700  | 5.26859400  | 0.82714400  | H  | 4.62739200  | -0.42499600 | 3.25107200  |
| H                      | 0.21056900  | 5.26172100  | -0.94268700 | C  | 4.03719500  | 1.48468900  | -2.36827500 |
| C                      | -1.85453400 | 3.52223400  | 1.24224200  | H  | 2.98127300  | 1.25915100  | -2.55109400 |
| H                      | -2.29036500 | 2.51605400  | 1.25950200  | H  | 4.10390600  | 2.55739800  | -2.15657900 |
| H                      | -1.22009600 | 3.63341400  | 2.12805800  | H  | 4.59036200  | 1.28556100  | -3.28922200 |
| H                      | -2.67228400 | 4.25166600  | 1.30759700  | C  | -0.48105900 | 1.91284300  | 2.73504000  |
| <b>L<sub>2</sub>-4</b> |             |             |             | H  | -1.14147900 | 1.98288600  | 3.60322700  |
| C                      | 1.77696900  | 1.64614000  | 0.20263300  | H  | -0.45964800 | 0.86519700  | 2.41176300  |
| C                      | 2.23402200  | 3.75524200  | 0.94220800  | H  | 0.53026100  | 2.18635700  | 3.05146300  |
| C                      | 3.41891100  | 3.11268500  | 0.80778100  | C  | 0.24892600  | 4.37848400  | -1.66427400 |
| N                      | 3.12585400  | 1.82913700  | 0.35578600  | H  | 1.05935400  | 5.04734200  | -1.35287500 |
| N                      | 1.24288200  | 2.85175100  | 0.56883300  | H  | 0.71666200  | 3.50091300  | -2.12264000 |
| C                      | 4.58482100  | 0.65808600  | -1.22975700 | H  | -0.33074300 | 4.89400100  | -2.43362500 |
| C                      | 4.13194400  | 0.83174200  | 0.08852500  | O  | -0.06799700 | -1.36847000 | -1.25604100 |
| C                      | 4.65598600  | 0.09206900  | 1.16125200  | C  | -0.13396800 | -1.60630500 | -2.68047300 |
| C                      | 5.64231600  | -0.85804600 | 0.87851000  | C  | -0.70860300 | -0.36111900 | -3.37330900 |
| C                      | 6.10624500  | -1.07869500 | -0.42207900 | H  | -1.72595800 | -0.17607700 | -3.02213300 |
| C                      | 5.57107200  | -0.30619900 | -1.45825100 | H  | -0.09077600 | 0.51709100  | -3.15006700 |
| H                      | 6.05461200  | -1.44210300 | 1.69768000  | H  | -0.73162100 | -0.49435300 | -4.46136200 |
| H                      | 5.93091400  | -0.45412200 | -2.47359700 | C  | -0.99722700 | -2.83844300 | -2.98911900 |
| C                      | -0.63967500 | 3.98262600  | -0.50833600 | H  | -0.94652300 | -3.06067500 | -4.06125600 |
| C                      | -1.97610100 | 4.38654400  | -0.47134300 | H  | -0.64353400 | -3.70397300 | -2.42609400 |
| C                      | -2.82691800 | 4.02796000  | 0.58079900  | H  | -2.04120400 | -2.66037500 | -2.72473400 |
| C                      | -2.31312200 | 3.23072200  | 1.60691400  | C  | 1.30943500  | -1.85768000 | -3.14166400 |
| C                      | -0.98173100 | 2.79654300  | 1.61971300  | H  | 1.35751300  | -1.99287200 | -4.22808300 |
| C                      | -0.15887500 | 3.19702700  | 0.55495700  | H  | 1.95118100  | -1.01154200 | -2.87207100 |
| H                      | -2.36014400 | 4.99912900  | -1.28358600 | H  | 1.71071700  | -2.75541600 | -2.66168100 |
|                        |             |             |             | B  | -1.04568200 | -1.83245500 | -0.13496100 |
|                        |             |             |             | O  | -0.31344900 | -1.33071300 | 1.07972400  |

|                          |             |             |             |    |             |             |             |
|--------------------------|-------------|-------------|-------------|----|-------------|-------------|-------------|
| O                        | -1.04305300 | -3.28988800 | 0.00696200  | C  | 0.55245400  | -4.15175300 | -1.16383300 |
| C                        | -0.67200100 | -3.63809600 | 1.33619600  | C  | 1.86842600  | -3.89309500 | -0.97107400 |
| C                        | 0.28441800  | -2.45902400 | 1.75344400  | N  | 1.94764000  | -2.61426900 | -0.42917300 |
| C                        | 1.71674700  | -2.67339200 | 1.23405700  | N  | -0.14133400 | -3.02487800 | -0.73546700 |
| H                        | 2.28853000  | -1.74767600 | 1.35401600  | C  | 3.87014200  | -2.32806300 | 1.06145000  |
| H                        | 2.23707400  | -3.46328300 | 1.78727900  | C  | 3.20857700  | -1.97936700 | -0.12782900 |
| H                        | 1.70802200  | -2.93156800 | 0.17352000  | C  | 3.76251200  | -1.08792300 | -1.06005500 |
| C                        | 0.32222300  | -2.15789000 | 3.25363300  | C  | 5.02238400  | -0.55098700 | -0.77125900 |
| H                        | 0.67893300  | -3.02408700 | 3.82277700  | C  | 5.71966300  | -0.87595500 | 0.39584200  |
| H                        | 1.00680100  | -1.32507300 | 3.45090800  | C  | 5.12713700  | -1.76606100 | 1.29855800  |
| H                        | -0.66510300 | -1.87806400 | 3.62542700  | H  | 5.46829500  | 0.13872400  | -1.48358400 |
| C                        | -0.00722400 | -5.01967200 | 1.31048400  | H  | 5.65255400  | -2.02697400 | 2.21417400  |
| H                        | 0.81715800  | -5.05422400 | 0.59558900  | C  | -2.35875900 | -3.56614600 | 0.14936000  |
| H                        | 0.37143600  | -5.30197300 | 2.29995800  | C  | -3.74949900 | -3.51983400 | 0.00801400  |
| H                        | -0.74394500 | -5.76961700 | 1.00579100  | C  | -4.36068900 | -2.85308600 | -1.05925300 |
| C                        | -1.93944200 | -3.70684100 | 2.21220600  | C  | -3.54448300 | -2.21882700 | -2.00045700 |
| H                        | -1.72406500 | -4.06533900 | 3.22510700  | C  | -2.14913000 | -2.23419900 | -1.90823400 |
| H                        | -2.42736100 | -2.73171400 | 2.27436300  | C  | -1.57803100 | -2.91959800 | -0.82268200 |
| H                        | -2.64113400 | -4.40584600 | 1.74625000  | H  | -4.36740100 | -4.02046200 | 0.74971500  |
| B                        | -2.65944000 | -1.20551000 | -0.26977900 | H  | -4.00291600 | -1.69616700 | -2.83631000 |
| C                        | -4.70372500 | -0.51707300 | -1.13010500 | Cu | 0.25530500  | -0.25451900 | 0.21692900  |
| O                        | -3.40972900 | -1.09216100 | -1.43800600 | H  | 2.74840600  | -4.48260500 | -1.17263000 |
| C                        | -4.83109100 | -0.79514100 | 0.41472900  | H  | 0.04674100  | -5.01395000 | -1.56794200 |
| O                        | -3.44610500 | -0.87685300 | 0.82987800  | C  | 7.06436700  | -0.25623000 | 0.69388300  |
| C                        | -5.75661400 | -1.19586000 | -2.00695900 | H  | 7.71346100  | -0.94877200 | 1.23853300  |
| H                        | -6.76332000 | -0.83660000 | -1.76577400 | H  | 7.57906600  | 0.04421800  | -0.22325100 |
| H                        | -5.55955000 | -0.96707700 | -3.05870600 | H  | 6.95142100  | 0.64093500  | 1.31474600  |
| H                        | -5.73621800 | -2.28079400 | -1.89150000 | C  | -5.86523100 | -2.79821100 | -1.18109800 |
| C                        | -4.62411900 | 0.97655900  | -1.47776800 | H  | -6.34134100 | -3.63052500 | -0.65464200 |
| H                        | -4.34170400 | 1.08068400  | -2.52949700 | H  | -6.25879500 | -1.86897300 | -0.75152700 |
| H                        | -5.58652400 | 1.47886800  | -1.33184000 | H  | -6.18275500 | -2.83069800 | -2.22785500 |
| H                        | -3.86619900 | 1.48232800  | -0.87398900 | C  | 3.03671400  | -0.70465700 | -2.32613600 |
| C                        | -5.51779300 | 0.30567000  | 1.22353100  | H  | 2.63038200  | -1.58061600 | -2.84277200 |
| H                        | -6.55944500 | 0.43687400  | 0.90980200  | H  | 2.20006800  | -0.02932700 | -2.11133700 |
| H                        | -5.51694500 | 0.03287700  | 2.28323700  | H  | 3.71511300  | -0.19205200 | -3.01309100 |
| H                        | -4.99854400 | 1.26055700  | 1.12325100  | C  | 3.24647600  | -3.27023700 | 2.06374800  |
| C                        | -5.47531000 | -2.15244800 | 0.73571600  | H  | 2.26366200  | -2.90993600 | 2.38584800  |
| H                        | -5.35165800 | -2.35859600 | 1.80258000  | H  | 3.09872400  | -4.27406100 | 1.64960200  |
| H                        | -6.54545200 | -2.16229700 | 0.50464600  | H  | 3.88009300  | -3.36378500 | 2.94887000  |
| H                        | -4.98979100 | -2.95998800 | 0.18134500  | C  | -1.30677900 | -1.52602400 | -2.94006300 |
| <b>L<sub>2</sub>-TS5</b> |             |             |             | H  | -1.90770800 | -1.28525300 | -3.82087300 |
| C                        | 0.70854600  | -2.05593600 | -0.27828000 | H  | -0.90138500 | -0.58805500 | -2.54191600 |
|                          |             |             |             | H  | -0.45978300 | -2.13921900 | -3.26498600 |
|                          |             |             |             | C  | -1.72917300 | -4.28649500 | 1.31877600  |

|   |             |             |             |                        |             |             |             |
|---|-------------|-------------|-------------|------------------------|-------------|-------------|-------------|
| H | -1.13227000 | -5.14815700 | 0.99924300  | H                      | -3.98262900 | 1.61513200  | 4.25987500  |
| H | -1.06056300 | -3.62432300 | 1.87884800  | H                      | -2.29942000 | 1.30004500  | 4.71098400  |
| H | -2.49835800 | -4.64977500 | 2.00443400  | H                      | -2.69592600 | 2.73108600  | 3.75340200  |
| O | 1.42146200  | 1.68638300  | 0.42720900  | C                      | -2.88246400 | -0.64029500 | 2.97265200  |
| C | 2.10037300  | 2.37485400  | 1.49746100  | H                      | -2.12690500 | -0.91467000 | 3.71489100  |
| C | 2.92167700  | 1.30783100  | 2.23406100  | H                      | -3.86941200 | -0.86769500 | 3.38897100  |
| H | 2.25605100  | 0.55950400  | 2.67733600  | H                      | -2.72779800 | -1.25684400 | 2.08399600  |
| H | 3.59931700  | 0.79987200  | 1.54326000  | C                      | -4.83751500 | 0.50036900  | 1.12537400  |
| H | 3.51525300  | 1.75723500  | 3.03843100  | H                      | -5.55101200 | 0.60096900  | 1.95103000  |
| C | 1.14844800  | 3.06512800  | 2.48827300  | H                      | -5.31950300 | 0.87306700  | 0.21645900  |
| H | 1.73508800  | 3.54324800  | 3.28162800  | H                      | -4.61409300 | -0.55774400 | 0.97968200  |
| H | 0.55119400  | 3.82728700  | 1.98541000  | C                      | -3.90579100 | 2.81048700  | 1.41272600  |
| H | 0.46979200  | 2.34227200  | 2.94429900  | H                      | -4.35398200 | 3.08725200  | 0.45512700  |
| C | 3.04245500  | 3.41743400  | 0.87120600  | H                      | -4.61815300 | 3.05462200  | 2.20719000  |
| H | 3.64837700  | 3.91146800  | 1.64022500  | H                      | -3.00349800 | 3.41262800  | 1.54527500  |
| H | 3.71750200  | 2.93883400  | 0.15447600  |                        |             |             |             |
| H | 2.46355700  | 4.18438400  | 0.35016500  | <b>L<sub>2</sub>-6</b> |             |             |             |
| B | 0.11021100  | 1.96728500  | -0.19483700 | C                      | 0.02060400  | -1.63265200 | 0.03708300  |
| O | 0.10705300  | 1.58369600  | -1.60876700 | C                      | -0.63542700 | -3.80977900 | 0.23490800  |
| O | -0.33714200 | 3.34183600  | -0.14194300 | C                      | 0.72096700  | -3.79472400 | 0.24741100  |
| C | -0.64776900 | 3.81005700  | -1.46687300 | N                      | 1.10302500  | -2.46157300 | 0.12499400  |
| C | 0.09344500  | 2.77587300  | -2.40723200 | N                      | -1.04474200 | -2.48544400 | 0.10544100  |
| C | 1.54429200  | 3.17638000  | -2.73206200 | C                      | 3.11591700  | -1.67992500 | 1.28936800  |
| H | 2.02772600  | 2.34526300  | -3.25513900 | C                      | 2.47583400  | -2.01870300 | 0.08648600  |
| H | 1.59331700  | 4.05793800  | -3.38081200 | C                      | 3.13262100  | -1.95582600 | -1.15242500 |
| H | 2.11504900  | 3.37466900  | -1.82413800 | C                      | 4.47038900  | -1.54934800 | -1.16181600 |
| C | -0.63934400 | 2.47081600  | -3.71782400 | C                      | 5.14676900  | -1.20519500 | 0.01250500  |
| H | -0.73929000 | 3.36951300  | -4.33712900 | C                      | 4.45373300  | -1.27969700 | 1.22519800  |
| H | -0.06988700 | 1.73185900  | -4.29131300 | H                      | 4.99341700  | -1.49594300 | -2.11359800 |
| H | -1.63388100 | 2.06110000  | -3.53285900 | H                      | 4.96443500  | -1.01467100 | 2.14793500  |
| C | -0.14201500 | 5.25268100  | -1.58362900 | C                      | -3.08439700 | -1.69880400 | 1.22076100  |
| H | 0.92315800  | 5.32827500  | -1.35744500 | C                      | -4.42955000 | -1.32966600 | 1.12810100  |
| H | -0.31398900 | 5.65234800  | -2.58966500 | C                      | -5.11264400 | -1.32034400 | -0.09229300 |
| H | -0.68168200 | 5.88631900  | -0.87286700 | C                      | -4.41825700 | -1.69842000 | -1.24552600 |
| C | -2.17320900 | 3.80109300  | -1.65311600 | C                      | -3.07248500 | -2.07574400 | -1.20757000 |
| H | -2.46291000 | 4.20643400  | -2.62846300 | C                      | -2.42609800 | -2.07346900 | 0.03851900  |
| H | -2.57711500 | 2.79333700  | -1.54511000 | H                      | -4.95404200 | -1.03720800 | 2.03462700  |
| H | -2.62369000 | 4.42964300  | -0.87948800 | H                      | -4.93328900 | -1.69516500 | -2.20316600 |
| B | -1.34629100 | 1.09972300  | 0.79862100  | Cu                     | -0.00181900 | 0.33245500  | -0.05818600 |
| C | -2.73429700 | 0.85268800  | 2.64638500  | H                      | 1.44148800  | -4.59284700 | 0.33067600  |
| O | -1.37064000 | 1.05380400  | 2.19123800  | H                      | -1.33941800 | -4.62366200 | 0.30614900  |
| C | -3.57103800 | 1.31246200  | 1.39478300  | C                      | 6.58134000  | -0.73448800 | -0.02987600 |
| O | -2.64069200 | 1.09222000  | 0.29854600  | H                      | 7.12879700  | -1.03435800 | 0.86889500  |
| C | -2.94507700 | 1.68110500  | 3.91400300  |                        |             |             |             |

|   |             |             |             |                   |             |             |             |
|---|-------------|-------------|-------------|-------------------|-------------|-------------|-------------|
| H | 7.10920000  | -1.13541600 | -0.90006400 | L <sub>2</sub> -7 |             |             |             |
| H | 6.63242300  | 0.35950200  | -0.09196500 |                   |             |             |             |
| C | -6.55639900 | -0.88256600 | -0.16563400 | C                 | -0.40504500 | -1.13161900 | -1.25889000 |
| H | -7.11075800 | -1.17699000 | 0.73077400  | C                 | -0.11103300 | -2.28029400 | -3.21151700 |
| H | -6.63075700 | 0.20861800  | -0.24953300 | C                 | -1.42910600 | -1.98465600 | -3.11346400 |
| H | -7.06197300 | -1.31214800 | -1.03533400 | N                 | -1.59199300 | -1.28164000 | -1.92184400 |
| C | 2.41867200  | -2.28763100 | -2.44041800 | N                 | 0.49842700  | -1.75302800 | -2.07550300 |
| H | 1.95049400  | -3.27714100 | -2.40785300 | C                 | -3.26510300 | 0.51053900  | -1.92948100 |
| H | 1.62355300  | -1.56117300 | -2.64232700 | C                 | -2.86647500 | -0.76320400 | -1.48857800 |
| H | 3.11418300  | -2.26943700 | -3.28287600 | C                 | -3.69240800 | -1.57090500 | -0.69175200 |
| C | 2.38314800  | -1.71738300 | 2.60836700  | C                 | -4.93346200 | -1.05380100 | -0.30560700 |
| H | 1.58939100  | -0.96212500 | 2.63233000  | C                 | -5.35861900 | 0.21871600  | -0.69754300 |
| H | 1.90988000  | -2.68872600 | 2.78740400  | C                 | -4.51615300 | 0.97869700  | -1.51604700 |
| H | 3.06753900  | -1.51553700 | 3.43585800  | H                 | -5.58201300 | -1.66612000 | 0.31593200  |
| C | -2.33974000 | -2.44698200 | -2.47428800 | H                 | -4.84133600 | 1.96167200  | -1.84908600 |
| H | -3.01924700 | -2.43749700 | -3.32984200 | C                 | 2.75851700  | -0.85375000 | -2.38242500 |
| H | -1.52876400 | -1.73887200 | -2.67752400 | C                 | 4.13508700  | -0.99450100 | -2.18691800 |
| H | -1.88824200 | -3.44297800 | -2.41158500 | C                 | 4.67764100  | -2.07074300 | -1.47588800 |
| C | -2.36489500 | -1.66462400 | 2.54694100  | C                 | 3.80541400  | -3.02712400 | -0.94918900 |
| H | -1.84187900 | -2.60416100 | 2.75414000  | C                 | 2.41847400  | -2.93342000 | -1.11353200 |
| H | -1.61443600 | -0.86594000 | 2.55845000  | C                 | 1.91815300  | -1.84079100 | -1.83722000 |
| H | -3.06799400 | -1.47911800 | 3.36250400  | H                 | 4.79987300  | -0.24101400 | -2.60285700 |
| B | -0.02882600 | 2.32767000  | -0.07204400 | H                 | 4.20962400  | -3.87104000 | -0.39519300 |
| C | 0.45258700  | 4.52063100  | -0.66666000 | Cu                | 0.03164300  | -0.04175800 | 0.35005500  |
| O | 0.41914700  | 3.14286800  | -1.11511400 | C                 | -6.68878600 | 0.76762900  | -0.23784300 |
| C | -0.56576300 | 4.50675500  | 0.52904300  | H                 | -7.39556600 | -0.03487300 | -0.00731000 |
| O | -0.49770500 | 3.12895600  | 0.97389400  | H                 | -6.57211300 | 1.37116800  | 0.67089900  |
| C | 0.07388800  | 5.42637000  | -1.83899900 | H                 | -7.14116300 | 1.41203500  | -0.99801300 |
| H | 0.03060200  | 6.47713600  | -1.52993400 | C                 | 6.17056900  | -2.18067500 | -1.27337100 |
| H | 0.82657200  | 5.33761300  | -2.62844600 | H                 | 6.71393800  | -2.03439900 | -2.21309000 |
| H | -0.89158100 | 5.14817600  | -2.26553900 | H                 | 6.52847200  | -1.41643100 | -0.57310100 |
| C | 1.89721100  | 4.81335700  | -0.23030600 | H                 | 6.44997400  | -3.15791500 | -0.87000100 |
| H | 2.56767700  | 4.59724100  | -1.06715500 | C                 | -3.26868500 | -2.95632000 | -0.27139300 |
| H | 2.03564200  | 5.86014400  | 0.06118100  | H                 | -4.05303300 | -3.43723900 | 0.31659400  |
| H | 2.18924800  | 4.17470800  | 0.60770200  | H                 | -3.05495900 | -3.59097900 | -1.13910100 |
| C | -0.20914000 | 5.41892900  | 1.70333400  | H                 | -2.36470000 | -2.92779000 | 0.34326700  |
| H | -0.19040200 | 6.47090400  | 1.39602900  | C                 | -2.38732600 | 1.34918800  | -2.82693300 |
| H | -0.95992200 | 5.31131000  | 2.49231100  | H                 | -1.47616300 | 1.67167700  | -2.31216200 |
| H | 0.76253900  | 5.16313700  | 2.12986400  | H                 | -2.07509200 | 0.79444500  | -3.71853500 |
| C | -2.01721300 | 4.76462300  | 0.09365100  | H                 | -2.92603800 | 2.24052900  | -3.16010300 |
| H | -2.68200600 | 4.53115400  | 0.93042200  | C                 | 1.49629500  | -3.96122900 | -0.50514600 |
| H | -2.18132500 | 5.80815100  | -0.19620700 | H                 | 0.90564300  | -3.51015400 | 0.29925000  |
| H | -2.29372800 | 4.12015700  | -0.74512900 | H                 | 0.79375000  | -4.36804900 | -1.24021600 |
|   |             |             |             | H                 | 2.06869200  | -4.79273500 | -0.08609600 |

|   |             |             |             |                          |             |             |             |
|---|-------------|-------------|-------------|--------------------------|-------------|-------------|-------------|
| C | 2.20566800  | 0.32674900  | -3.14485300 | H                        | 1.72259400  | 2.37717900  | 3.00035200  |
| H | 1.52569700  | 0.01238800  | -3.94401300 | C                        | 4.85452900  | 1.17176300  | 2.42002600  |
| H | 1.64492600  | 1.00081000  | -2.48722600 | H                        | 5.28892300  | -0.82436500 | 1.72997500  |
| H | 3.01845500  | 0.89801600  | -3.60110200 | H                        | 4.10228900  | 3.06772800  | 3.12503100  |
| C | 0.72419200  | -0.01506000 | 2.30821400  | H                        | 5.89744600  | 1.47243600  | 2.46984300  |
| N | 0.39097300  | -1.29818200 | 2.10088600  | H                        | 0.07840600  | 0.64609400  | 2.89196300  |
| C | -0.86131000 | -1.75839200 | 2.56467400  | H                        | -2.25980000 | -2.20172400 | -3.76582800 |
| C | -0.96932500 | -3.14033100 | 2.81866600  | H                        | 0.44845500  | -2.80828600 | -3.96713900 |
| C | -1.99164500 | -0.94887300 | 2.80979600  |                          |             |             |             |
| C | -2.14698000 | -3.69081100 | 3.31812800  | <b>L<sub>2</sub>-TS8</b> |             |             |             |
| H | -0.09577800 | -3.76001500 | 2.63990500  | C                        | -0.46558500 | -1.53505200 | -1.00673400 |
| C | -3.17077600 | -1.50947800 | 3.30085500  | C                        | -0.24301900 | -3.27473900 | -2.46348400 |
| H | -1.95475200 | 0.11623700  | 2.60376200  | C                        | -1.56176800 | -2.97156800 | -2.39459300 |
| C | -3.25788700 | -2.87836700 | 3.56436500  | N                        | -1.68443400 | -1.90632900 | -1.50515500 |
| H | -2.19679800 | -4.75754900 | 3.52097000  | N                        | 0.41372600  | -2.38932800 | -1.61343700 |
| H | -4.02948900 | -0.86704500 | 3.47843800  | C                        | -3.45107500 | -0.33809000 | -2.13342400 |
| H | -4.17632600 | -3.30550900 | 3.95671800  | C                        | -2.93841000 | -1.26075900 | -1.20569000 |
| B | 0.04235700  | 1.97210300  | 0.17211800  | C                        | -3.62353800 | -1.59494100 | -0.02623900 |
| C | -0.34906900 | 4.23431300  | 0.53638600  | C                        | -4.84120000 | -0.95041500 | 0.21862000  |
| O | -0.31337700 | 2.90958800  | 1.13654300  | C                        | -5.37750600 | -0.01106800 | -0.66673100 |
| C | 0.55639700  | 4.05139700  | -0.73680400 | C                        | -4.67247200 | 0.27478300  | -1.84077900 |
| O | 0.42796400  | 2.62417400  | -1.00158400 | H                        | -5.38119100 | -1.19408200 | 1.13014100  |
| C | -1.81934800 | 4.53300100  | 0.20746600  | H                        | -5.08113900 | 0.99236800  | -2.54835200 |
| H | -2.40847900 | 4.45074200  | 1.12526800  | C                        | 2.65356300  | -1.60884800 | -2.23411800 |
| H | -1.95195800 | 5.54195800  | -0.19674600 | C                        | 4.03656200  | -1.66119300 | -2.02978900 |
| H | -2.21795000 | 3.81209600  | -0.51131500 | C                        | 4.60729900  | -2.45244900 | -1.02833900 |
| C | 0.16755500  | 5.24564000  | 1.55931300  | C                        | 3.75782300  | -3.19985900 | -0.20489700 |
| H | 1.16378700  | 4.98192000  | 1.91868400  | C                        | 2.36945900  | -3.18724900 | -0.36816600 |
| H | 0.20800400  | 6.25318200  | 1.13053500  | C                        | 1.83993700  | -2.39060600 | -1.39811200 |
| H | -0.50586200 | 5.27300900  | 2.42127000  | H                        | 4.68125300  | -1.06147700 | -2.66764900 |
| C | 0.09889700  | 4.81981200  | -1.97614900 | H                        | 4.18355800  | -3.80716800 | 0.59014400  |
| H | 0.12918300  | 5.90097600  | -1.80072800 | Cu                       | 0.03274600  | -0.26193800 | 0.30472500  |
| H | 0.76662800  | 4.59696700  | -2.81383600 | C                        | -6.67714500 | 0.69173400  | -0.35290900 |
| H | -0.91518000 | 4.54526800  | -2.27204300 | H                        | -7.36580900 | 0.03629700  | 0.18878300  |
| C | 2.04509800  | 4.32163100  | -0.47587700 | H                        | -6.50430700 | 1.57213900  | 0.27828900  |
| H | 2.40463200  | 3.76153300  | 0.39122300  | H                        | -7.17801400 | 1.03493600  | -1.26291400 |
| H | 2.62055300  | 3.99459800  | -1.34678200 | C                        | 6.10629500  | -2.51909900 | -0.85258200 |
| H | 2.24351000  | 5.38635600  | -0.31547600 | H                        | 6.52836200  | -3.37774700 | -1.38985300 |
| C | 2.15454200  | 0.38699700  | 2.30102000  | H                        | 6.59502600  | -1.62026100 | -1.23931000 |
| C | 3.17458500  | -0.50964100 | 1.94600200  | H                        | 6.38069500  | -2.63032100 | 0.20077500  |
| C | 2.50868700  | 1.67909800  | 2.72689400  | C                        | -3.08550900 | -2.60913700 | 0.95189300  |
| C | 4.51085400  | -0.11591100 | 2.00175000  | H                        | -3.87192900 | -2.93263300 | 1.63739700  |
| H | 2.90392200  | -1.51356700 | 1.64035900  | H                        | -2.68851500 | -3.49242100 | 0.44147100  |
| C | 3.84558700  | 2.06741000  | 2.78623600  |                          |             |             |             |



|   |             |             |             |                        |             |             |             |
|---|-------------|-------------|-------------|------------------------|-------------|-------------|-------------|
| H | -2.27934300 | -2.18847600 | 1.56112700  | H                      | 1.79568000  | 4.40693600  | 0.22264700  |
| C | -2.72095900 | -0.02392700 | -3.41827600 | H                      | 2.74671100  | 4.12354800  | -1.23177500 |
| H | -1.66276800 | 0.18895800  | -3.23770000 | H                      | 1.62239200  | 5.49526300  | -1.17371600 |
| H | -2.76044700 | -0.86297900 | -4.12327400 | C                      | 2.19906300  | 1.46936600  | 1.79185100  |
| H | -3.16679000 | 0.84253700  | -3.91288800 | C                      | 3.22624800  | 0.63531500  | 1.32754000  |
| C | 1.47612300  | -3.97255900 | 0.56042500  | C                      | 2.54131500  | 2.71387900  | 2.33642000  |
| H | 0.90226600  | -3.29457500 | 1.20166400  | C                      | 4.55577000  | 1.04559500  | 1.39524000  |
| H | 0.75983600  | -4.59418300 | 0.01298800  | H                      | 2.97828900  | -0.34271200 | 0.92924300  |
| H | 2.07004700  | -4.62573700 | 1.20429300  | C                      | 3.87506200  | 3.12431300  | 2.41045700  |
| C | 2.06771400  | -0.70364400 | -3.29116100 | H                      | 1.75597000  | 3.36084800  | 2.72128700  |
| H | 1.29700200  | -1.20702000 | -3.88339600 | C                      | 4.88793400  | 2.29235800  | 1.93481000  |
| H | 1.60746600  | 0.17705200  | -2.82817500 | H                      | 5.33887200  | 0.38639500  | 1.02991000  |
| H | 2.84791500  | -0.35658900 | -3.97347400 | H                      | 4.11936400  | 4.08946800  | 2.84637900  |
| C | 0.74927700  | 1.04216500  | 1.77127700  | H                      | 5.92659600  | 2.60666600  | 1.99005600  |
| N | 0.56249800  | -0.28804900 | 2.25744400  | H                      | 0.13066500  | 1.79728500  | 2.26493200  |
| C | -0.56948000 | -0.54631800 | 3.02979500  | H                      | -2.41919500 | -3.40763700 | -2.88143400 |
| C | -0.58893200 | -1.76828000 | 3.75329600  | H                      | 0.28799700  | -4.02694400 | -3.02455000 |
| C | -1.70350000 | 0.29588000  | 3.17420900  |                        |             |             |             |
| C | -1.65888900 | -2.11929400 | 4.56610400  | <b>L<sub>2</sub>-9</b> |             |             |             |
| H | 0.27957500  | -2.41569200 | 3.66840000  | C                      | 0.01871900  | -2.07219400 | -0.59697300 |
| C | -2.77093100 | -0.06697700 | 3.99843700  | C                      | 0.81667100  | -3.78814900 | -1.86559500 |
| H | -1.76161300 | 1.23352700  | 2.62986700  | C                      | -0.53706800 | -3.85478300 | -1.90651400 |
| C | -2.76693700 | -1.27134600 | 4.70232800  | N                      | -1.00931000 | -2.80381300 | -1.12797200 |
| H | -1.62651900 | -3.06030900 | 5.11117000  | N                      | 1.14034000  | -2.69822800 | -1.06280500 |
| H | -3.62118300 | 0.60688100  | 4.08355900  | C                      | -3.07188700 | -1.62170100 | -1.73319500 |
| H | -3.59935900 | -1.54338400 | 5.34472300  | C                      | -2.40690200 | -2.53081100 | -0.89582900 |
| B | 0.19331700  | 1.83074400  | 0.02806900  | C                      | -3.05885700 | -3.18898000 | 0.15970900  |
| C | -0.74714500 | 3.76097900  | -0.81782600 | C                      | -4.41020500 | -2.90170000 | 0.37119500  |
| O | -0.77335700 | 2.78779200  | 0.26324500  | C                      | -5.10436800 | -1.98358500 | -0.42341000 |
| C | 0.68691700  | 3.53926900  | -1.44901800 | C                      | -4.42164200 | -1.36551500 | -1.47534400 |
| O | 1.00964600  | 2.17701800  | -1.03121300 | H                      | -4.92831100 | -3.39772300 | 1.18835700  |
| C | -1.90087100 | 3.40282400  | -1.76244400 | H                      | -4.94881600 | -0.65578800 | -2.10807400 |
| H | -2.83587000 | 3.40571700  | -1.19583000 | C                      | 3.13960500  | -1.33807500 | -1.50662100 |
| H | -1.99127000 | 4.12057700  | -2.58405700 | C                      | 4.47226500  | -1.04485000 | -1.19865500 |
| H | -1.76926400 | 2.40347400  | -2.18162400 | C                      | 5.15737800  | -1.69617500 | -0.17030600 |
| C | -0.98258700 | 5.14554600  | -0.21442000 | C                      | 4.48053700  | -2.67667500 | 0.56266400  |
| H | -0.25130100 | 5.37771700  | 0.56140500  | C                      | 3.15054100  | -3.00898400 | 0.29676100  |
| H | -0.93384700 | 5.92283600  | -0.98457600 | C                      | 2.49930200  | -2.32843900 | -0.74653700 |
| H | -1.97758000 | 5.18065000  | 0.23858900  | H                      | 4.98327200  | -0.27966300 | -1.77796400 |
| C | 0.73475800  | 3.59257600  | -2.97590600 | H                      | 4.99746700  | -3.19208900 | 1.36846200  |
| H | 0.45458800  | 4.58661000  | -3.34093100 | Cu                     | -0.17324500 | -0.51026300 | 0.46160700  |
| H | 1.75348700  | 3.38467700  | -3.31581000 | C                      | -6.54221900 | -1.63547700 | -0.12428900 |
| H | 0.06978300  | 2.85582800  | -3.43029500 | H                      | -7.08330700 | -2.48672000 | 0.29979200  |
| C | 1.77047300  | 4.45468400  | -0.86760600 |                        |             |             |             |

|   |             |             |             |                         |             |             |             |
|---|-------------|-------------|-------------|-------------------------|-------------|-------------|-------------|
| H | -6.59096100 | -0.81785300 | 0.60508900  | C                       | -0.80880100 | 5.69870200  | -1.79762700 |
| H | -7.07211900 | -1.30592500 | -1.02276800 | H                       | 0.09753100  | 6.21811200  | -1.48126200 |
| C | 6.57965200  | -1.32230500 | 0.16900600  | H                       | -0.96328100 | 5.88176900  | -2.86647800 |
| H | 7.12133100  | -0.96061900 | -0.71006800 | H                       | -1.65263400 | 6.13429200  | -1.25507700 |
| H | 6.59297600  | -0.52042800 | 0.91690100  | C                       | 0.13768300  | 2.73195800  | -3.48855700 |
| H | 7.13116200  | -2.17044700 | 0.58570600  | H                       | -0.18277600 | 3.45191600  | -4.24934800 |
| C | -2.32553500 | -4.15632100 | 1.05759400  | H                       | 1.02577100  | 2.21709900  | -3.86706900 |
| H | -3.00697300 | -4.59466700 | 1.79044100  | H                       | -0.65319000 | 1.99148400  | -3.35693500 |
| H | -1.86565800 | -4.97366600 | 0.49164700  | C                       | 1.71551500  | 4.32191800  | -2.36052800 |
| H | -1.52044700 | -3.65271200 | 1.60418500  | H                       | 1.96523400  | 4.85066800  | -1.43638300 |
| C | -2.35677400 | -0.92816000 | -2.86724100 | H                       | 2.56418100  | 3.68562900  | -2.62706900 |
| H | -1.54835500 | -0.29175700 | -2.49095300 | H                       | 1.57696000  | 5.06134900  | -3.15527500 |
| H | -1.90428900 | -1.64422400 | -3.56238000 | C                       | 1.88834200  | 1.68056800  | 1.81898500  |
| H | -3.05006500 | -0.30097700 | -3.43277400 | C                       | 2.05159000  | 0.72280900  | 2.83246200  |
| C | 2.43716800  | -4.05194400 | 1.12342300  | C                       | 3.03928200  | 2.25747600  | 1.26622800  |
| H | 1.57078400  | -3.62045400 | 1.63674800  | C                       | 3.32094200  | 0.36412700  | 3.28489600  |
| H | 2.06623300  | -4.88151900 | 0.51141300  | H                       | 1.16397600  | 0.27107200  | 3.26446900  |
| H | 3.10645100  | -4.46642500 | 1.88102400  | C                       | 4.31307600  | 1.90513000  | 1.72000600  |
| C | 2.42585000  | -0.57931600 | -2.59854400 | H                       | 2.94200500  | 2.99150900  | 0.47121200  |
| H | 1.75554600  | -1.22165100 | -3.17712800 | C                       | 4.45980900  | 0.95849000  | 2.73419400  |
| H | 1.82499900  | 0.23274500  | -2.17229100 | H                       | 3.42191400  | -0.37168200 | 4.07896000  |
| H | 3.14878500  | -0.13336100 | -3.28738000 | H                       | 5.18999100  | 2.37394200  | 1.28020900  |
| C | 0.48936000  | 2.15761200  | 1.43670300  | H                       | 5.44886200  | 0.69083200  | 3.09728500  |
| N | -0.50502900 | 1.06087000  | 1.44348200  | H                       | 0.21663200  | 2.88266100  | 2.21940000  |
| C | -1.75345100 | 1.29679100  | 1.99651200  | H                       | -1.20224500 | -4.53821800 | -2.40976500 |
| C | -2.61102500 | 0.19193200  | 2.25683000  | H                       | 1.57514700  | -4.40028600 | -2.32662800 |
| C | -2.26684900 | 2.57572200  | 2.34233100  |                         |             |             |             |
| C | -3.86991200 | 0.34946900  | 2.82008500  | <b>L<sub>2</sub>-10</b> |             |             |             |
| H | -2.24943400 | -0.80561900 | 2.01661900  | C                       | -2.43546100 | 1.20503600  | -0.30194800 |
| C | -3.52987800 | 2.71818300  | 2.91880900  | C                       | -4.58457000 | 1.89125700  | -0.61883700 |
| H | -1.69835900 | 3.46976700  | 2.11832000  | C                       | -3.79782700 | 2.99547600  | -0.66117400 |
| C | -4.35042900 | 1.61827000  | 3.16779500  | N                       | -2.49008300 | 2.56079800  | -0.46735400 |
| H | -4.47833200 | -0.53359000 | 3.00565500  | N                       | -3.73945900 | 0.80752800  | -0.39988700 |
| H | -3.87914500 | 3.71917000  | 3.16476600  | C                       | -0.68723500 | 3.72390200  | -1.65244900 |
| H | -5.33102700 | 1.74144800  | 3.61802400  | C                       | -1.34072000 | 3.43289000  | -0.44481800 |
| B | 0.31956700  | 2.88754800  | 0.04372700  | C                       | -0.91490100 | 3.96504200  | 0.78397100  |
| C | -0.73475300 | 4.20149800  | -1.50467800 | C                       | 0.19461000  | 4.81452600  | 0.77547100  |
| O | -0.45234200 | 4.02021500  | -0.09259200 | C                       | 0.87226600  | 5.13628000  | -0.40590700 |
| C | 0.47091500  | 3.44198600  | -2.17788800 | C                       | 0.41727100  | 4.58099700  | -1.60559000 |
| O | 0.80671600  | 2.44302800  | -1.17327200 | H                       | 0.54184700  | 5.22842100  | 1.71899400  |
| C | -2.09484300 | 3.54056200  | -1.76922900 | H                       | 0.93745500  | 4.81337300  | -2.53160100 |
| H | -2.83988400 | 3.99196600  | -1.10907300 | C                       | -4.28313800 | -1.33951200 | -1.45203200 |
| H | -2.41899300 | 3.67776300  | -2.80563400 | C                       | -4.73288200 | -2.65657900 | -1.31794400 |
| H | -2.06215700 | 2.47062000  | -1.54592600 |                         |             |             |             |



|    |             |             |             |   |             |             |             |
|----|-------------|-------------|-------------|---|-------------|-------------|-------------|
| C  | 3.80503300  | -0.11929100 | -0.20113200 | C | -0.89552000 | -1.81739300 | -1.52423800 |
| C  | 4.11038700  | -0.79339800 | 0.99247700  | C | -0.00064500 | -2.88352700 | -1.29101300 |
| C  | 4.66628800  | -2.07230900 | 0.89444000  | C | -1.53676300 | -1.77167700 | -2.78153600 |
| C  | 4.91246800  | -2.67905700 | -0.34162400 | C | 0.25040300  | -3.84663400 | -2.26649800 |
| C  | 4.59653200  | -1.97028600 | -1.50490700 | H | 0.49407300  | -2.93849100 | -0.32678800 |
| H  | 4.90909700  | -2.60789600 | 1.80901800  | C | -1.29037800 | -2.74592400 | -3.74791000 |
| H  | 4.78294900  | -2.42610500 | -2.47410300 | H | -2.22305500 | -0.96154100 | -2.99831700 |
| C  | 0.25060800  | 4.23458700  | -1.27855200 | C | -0.39564200 | -3.79078500 | -3.50386200 |
| C  | -0.91837000 | 4.99941100  | -1.27728800 | H | 0.94701100  | -4.65398800 | -2.05184900 |
| C  | -1.69106100 | 5.16582400  | -0.12233700 | H | -1.79994900 | -2.68086700 | -4.70645500 |
| C  | -1.26504500 | 4.54773300  | 1.05614800  | H | -0.20774300 | -4.54632500 | -4.26148600 |
| C  | -0.10282200 | 3.76947700  | 1.11123700  | B | -1.91008800 | -0.91253000 | 1.14557000  |
| C  | 0.64218100  | 3.63083200  | -0.07063200 | C | -1.61243600 | -2.42364300 | 2.85411600  |
| H  | -1.23496700 | 5.47238400  | -2.20376700 | O | -2.29723800 | -2.17772000 | 1.61040700  |
| H  | -1.85264400 | 4.66805200  | 1.96306500  | C | -1.36666700 | -0.96150600 | 3.38800500  |
| Cu | 0.44367900  | 0.32184300  | -0.34330300 | O | -1.21909800 | -0.20661200 | 2.16733500  |
| H  | 5.08434300  | 2.34073000  | 0.07354700  | C | -2.51351000 | -3.29385100 | 3.73134500  |
| H  | 3.29077900  | 4.46391800  | 0.17391600  | H | -2.63591200 | -4.27709300 | 3.26693500  |
| C  | 5.47931500  | -4.07680500 | -0.41872800 | H | -2.07596800 | -3.44153400 | 4.72500800  |
| H  | 6.09401700  | -4.30948800 | 0.45573100  | H | -3.50549500 | -2.85317200 | 3.84608100  |
| H  | 4.67603000  | -4.82250800 | -0.46145200 | C | -0.30476600 | -3.17003300 | 2.54887500  |
| H  | 6.09407700  | -4.21082900 | -1.31372200 | H | 0.36724700  | -2.55048200 | 1.94967700  |
| C  | -2.96920400 | 5.96972000  | -0.15689100 | H | 0.21654300  | -3.46848500 | 3.46451900  |
| H  | -3.18125700 | 6.42665100  | 0.81413400  | H | -0.53810500 | -4.07074100 | 1.97439100  |
| H  | -2.92218600 | 6.76555400  | -0.90609400 | C | -2.58325000 | -0.39093300 | 4.13579600  |
| H  | -3.82508100 | 5.33236600  | -0.41077000 | H | -2.72632300 | -0.86430800 | 5.11268200  |
| C  | 3.83937900  | -0.17133100 | 2.34143100  | H | -2.43090000 | 0.68107200  | 4.29292500  |
| H  | 4.38749600  | 0.76769200  | 2.47745900  | H | -3.49662200 | -0.52009400 | 3.54888300  |
| H  | 2.77569500  | 0.05845400  | 2.46524700  | C | -0.10870800 | -0.78651400 | 4.23956800  |
| H  | 4.13499400  | -0.85038400 | 3.14469300  | H | 0.79151800  | -1.06240300 | 3.68691300  |
| C  | 3.68826800  | 0.04034700  | -2.73748400 | H | -0.01201000 | 0.26002000  | 4.54638300  |
| H  | 2.60188900  | 0.11972600  | -2.85574300 | H | -0.15970700 | -1.39696800 | 5.14809900  |
| H  | 4.09112900  | 1.05858400  | -2.74967800 | C | -3.68200100 | -0.70255400 | -0.84807600 |
| H  | 4.08148300  | -0.49218500 | -3.60652400 | C | -4.11827100 | -2.04000700 | -0.84279000 |
| C  | 0.29053700  | 3.08306800  | 2.39658000  | C | -4.49654000 | 0.24968200  | -1.48302700 |
| H  | -0.15709800 | 3.59449100  | 3.25319400  | C | -5.31723400 | -2.40147800 | -1.45574400 |
| H  | -0.06701500 | 2.04590000  | 2.40013900  | H | -3.51811600 | -2.79076300 | -0.34275800 |
| H  | 1.37488100  | 3.06470500  | 2.53908400  | C | -5.70172800 | -0.10902900 | -2.08909500 |
| C  | 1.04718400  | 4.04916500  | -2.54812600 | H | -4.17671100 | 1.28954400  | -1.49927100 |
| H  | 2.07001000  | 4.43033900  | -2.45337600 | C | -6.11612200 | -1.44119900 | -2.08153700 |
| H  | 1.12317700  | 2.98907000  | -2.81370400 | H | -5.63214300 | -3.44177900 | -1.44073600 |
| H  | 0.57077200  | 4.57237500  | -3.38043000 | H | -6.31236400 | 0.65121800  | -2.56983300 |
| C  | -2.42468400 | -0.24591900 | -0.16554600 | H | -7.05094200 | -1.72854600 | -2.55534800 |
| N  | -1.04917200 | -0.82149800 | -0.53376000 | H | -2.37644100 | 0.84537400  | -0.19141100 |

**L<sub>2</sub>-12**

|    |             |             |             |   |             |             |             |
|----|-------------|-------------|-------------|---|-------------|-------------|-------------|
| C  | 1.93486100  | 1.52104600  | -0.07853500 | H | -0.35920100 | 3.21258500  | 3.41459800  |
| C  | 3.10550600  | 3.40912900  | 0.40291500  | H | -0.10471500 | 1.76857500  | 2.42315100  |
| C  | 3.99809500  | 2.39067300  | 0.31371800  | H | 1.24707300  | 2.86114100  | 2.75832500  |
| N  | 3.26658700  | 1.24490200  | 0.01757000  | C | 1.13244700  | 4.29271200  | -2.24016700 |
| N  | 1.85051000  | 2.86166800  | 0.15956800  | H | 2.13786800  | 4.68570900  | -2.05285700 |
| C  | 4.34298800  | -0.43963800 | -1.40161400 | H | 1.25316600  | 3.26852200  | -2.60983100 |
| C  | 3.84155100  | -0.06928900 | -0.14327100 | H | 0.68369900  | 4.88853400  | -3.03833800 |
| C  | 3.89019600  | -0.92819700 | 0.96647600  | C | -2.38780900 | -0.17754500 | -0.11113900 |
| C  | 4.47029300  | -2.18796700 | 0.78592100  | N | -1.01487600 | -0.84587500 | -0.48087500 |
| C  | 4.98203300  | -2.59852700 | -0.44900500 | C | -0.91675200 | -1.76227100 | -1.57133800 |
| C  | 4.91265000  | -1.70975000 | -1.52696900 | C | -0.39921800 | -3.05122300 | -1.36785600 |
| H  | 4.51991900  | -2.86550600 | 1.63483200  | C | -1.28225300 | -1.38127100 | -2.87440200 |
| H  | 5.30593000  | -2.01296900 | -2.49415600 | C | -0.22973400 | -3.92402900 | -2.44358800 |
| C  | 0.26908200  | 4.32738700  | -1.00135400 | H | -0.14124800 | -3.35886700 | -0.36176400 |
| C  | -0.92010500 | 5.06132500  | -0.98301700 | C | -1.11804500 | -2.26093900 | -3.94269200 |
| C  | -1.75081400 | 5.09268700  | 0.14212200  | H | -1.70400600 | -0.39441300 | -3.03632400 |
| C  | -1.36331100 | 4.37056000  | 1.27486200  | C | -0.58639100 | -3.53685100 | -3.73649200 |
| C  | -0.18405300 | 3.61817400  | 1.31174300  | H | 0.17394200  | -4.91773700 | -2.26555700 |
| C  | 0.61813100  | 3.61455400  | 0.15814600  | H | -1.40891200 | -1.94738800 | -4.94204700 |
| H  | -1.20518000 | 5.61794700  | -1.87234900 | H | -0.45925000 | -4.22072000 | -4.57092300 |
| H  | -1.99581300 | 4.38767100  | 2.15912200  | B | -1.64929000 | -1.11669400 | 0.94260100  |
| Cu | 0.49260500  | 0.32749100  | -0.33625000 | C | -1.67828100 | -2.71942100 | 2.63241900  |
| H  | 5.06921100  | 2.36918100  | 0.43583300  | O | -2.15261600 | -2.40607100 | 1.31799400  |
| H  | 3.23995700  | 4.45685900  | 0.61928200  | C | -1.36104400 | -1.29429600 | 3.22911900  |
| C  | 5.56979200  | -3.97873500 | -0.62284900 | O | -0.89857800 | -0.58275400 | 2.07141300  |
| H  | 5.99948200  | -4.35200700 | 0.31130500  | C | -2.77140900 | -3.49908700 | 3.36829800  |
| H  | 4.79986700  | -4.69395400 | -0.93711800 | H | -2.93059200 | -4.46275700 | 2.87403100  |
| H  | 6.35294600  | -3.98768900 | -1.38671200 | H | -2.48991400 | -3.69590000 | 4.40919500  |
| C  | -3.04839100 | 5.86552300  | 0.12701700  | H | -3.72002700 | -2.95921500 | 3.35647600  |
| H  | -3.25529000 | 6.31883200  | 1.10126200  | C | -0.41865300 | -3.59508400 | 2.50762500  |
| H  | -3.03292200 | 6.66100300  | -0.62338300 | H | 0.39287300  | -3.04494700 | 2.02265300  |
| H  | -3.89290100 | 5.20682900  | -0.10940700 | H | -0.06383700 | -3.95102600 | 3.48118300  |
| C  | 3.32032900  | -0.52653700 | 2.30553800  | H | -0.65670800 | -4.46821900 | 1.89253700  |
| H  | 3.68194300  | 0.45631200  | 2.62577000  | C | -2.62272600 | -0.59087000 | 3.76241600  |
| H  | 2.22602500  | -0.47293600 | 2.26992400  | H | -2.98736200 | -1.04394100 | 4.69026200  |
| H  | 3.59656700  | -1.25378700 | 3.07293500  | H | -2.38367200 | 0.45774400  | 3.96541500  |
| C  | 4.25456500  | 0.48705400  | -2.59050400 | H | -3.42612300 | -0.61814500 | 3.02183800  |
| H  | 3.21039100  | 0.68838300  | -2.85441700 | C | -0.27010400 | -1.27032100 | 4.30094100  |
| H  | 4.72875700  | 1.45474000  | -2.39437000 | H | 0.67659200  | -1.65801800 | 3.91951300  |
| H  | 4.74145800  | 0.04307300  | -3.46180800 | H | -0.10344400 | -0.24164000 | 4.63788100  |
| C  | 0.17483500  | 2.82323600  | 2.54360900  | H | -0.56181100 | -1.86478400 | 5.17407000  |
|    |             |             |             | C | -3.61910200 | -0.51428700 | -0.87397000 |
|    |             |             |             | C | -4.10953300 | -1.82818800 | -1.00760400 |
|    |             |             |             | C | -4.37233100 | 0.52545200  | -1.44922200 |

|   |             |             |             |   |            |             |             |
|---|-------------|-------------|-------------|---|------------|-------------|-------------|
| C | -5.29556300 | -2.08035700 | -1.69537300 | C | 4.60662700 | 1.51033900  | 1.70624200  |
| H | -3.56382700 | -2.64457300 | -0.54946100 | H | 4.84389500 | 2.48488600  | 1.26546600  |
| C | -5.56745300 | 0.27459600  | -2.12379500 | H | 3.62577600 | 1.60657300  | 2.18485600  |
| H | -4.01121900 | 1.54805200  | -1.35903400 | H | 5.34321700 | 1.30681900  | 2.48701800  |
| C | -6.03317700 | -1.03429400 | -2.25570100 | C | 2.87880200 | -0.47310900 | -2.65192000 |
| H | -5.65190700 | -3.10340300 | -1.78623600 | H | 1.82746200 | -0.62000100 | -2.38298400 |
| H | -6.12965300 | 1.10061400  | -2.55263100 | H | 2.95966800 | 0.49362900  | -3.15991900 |
| H | -6.95989800 | -1.23721800 | -2.78577900 | H | 3.13465700 | -1.25713600 | -3.36653200 |
| H | -2.24993600 | 0.90060000  | -0.03229200 | C | 0.70627700 | 4.42616100  | 1.79725300  |

**L<sub>2</sub>-TS13**

|    |             |             |             |   |             |             |             |
|----|-------------|-------------|-------------|---|-------------|-------------|-------------|
| C  | 1.64076000  | 1.69883200  | -0.20151000 | C | -0.81085500 | 2.43006600  | -2.63397300 |
| C  | 2.22073800  | 3.59277700  | -1.31207100 | H | 0.10439900  | 2.76556400  | -3.13200600 |
| C  | 3.29812400  | 2.76710200  | -1.32681500 | H | -0.68954900 | 1.36328100  | -2.41463900 |
| N  | 2.92711700  | 1.61462100  | -0.64445100 | H | -1.63604800 | 2.52633100  | -3.34332000 |
| N  | 1.21644400  | 2.92519600  | -0.62125300 | C | -2.35500800 | -0.78119600 | -0.20299900 |
| C  | 3.77281500  | -0.54547900 | -1.43838100 | N | -1.27431400 | -1.71168000 | -0.53162900 |
| C  | 3.78361000  | 0.46536700  | -0.46261400 | C | -0.75683500 | -2.16626400 | -1.71287800 |
| C  | 4.60767000  | 0.40905800  | 0.67271900  | C | 0.26065900  | -3.15169700 | -1.71888700 |
| C  | 5.43180400  | -0.71037300 | 0.82225500  | C | -1.20372400 | -1.67085500 | -2.96016500 |
| C  | 5.44630100  | -1.74725600 | -0.11682000 | C | 0.79976600  | -3.60965300 | -2.91674900 |
| C  | 4.61707000  | -1.64244900 | -1.23830900 | H | 0.59863000  | -3.55601700 | -0.76893900 |
| H  | 6.07799400  | -0.77189900 | 1.69451800  | C | -0.64896100 | -2.13836600 | -4.15043000 |
| H  | 4.62016800  | -2.43622600 | -1.98089600 | H | -2.00841800 | -0.94217300 | -2.97387900 |
| C  | -1.09666300 | 3.22236100  | -1.38096100 | C | 0.35791700  | -3.10779800 | -4.14707300 |
| C  | -2.37279100 | 3.74586000  | -1.14605800 | H | 1.57202300  | -4.37579900 | -2.89069100 |
| C  | -2.67745500 | 4.46845000  | 0.01158400  | H | -1.01854500 | -1.74582500 | -5.09533500 |
| C  | -1.66107600 | 4.68221200  | 0.94935300  | H | 0.77744300  | -3.47518400 | -5.07895100 |
| C  | -0.36887400 | 4.18290100  | 0.76499500  | B | -1.46720400 | -1.58829300 | 0.90494100  |
| C  | -0.11210400 | 3.45013500  | -0.40551200 | C | -1.13302900 | -2.63030900 | 2.98771900  |
| H  | -3.14844300 | 3.57780600  | -1.88872200 | O | -1.95504700 | -2.56835800 | 1.82860000  |
| H  | -1.87760100 | 5.25160200  | 1.85000600  | C | -0.54436200 | -1.17184400 | 3.09368200  |
| Cu | 0.65208200  | 0.41687600  | 0.76027800  | O | -0.37219100 | -0.86516800 | 1.68519700  |
| H  | 4.27979000  | 2.88385500  | -1.75722300 | C | -2.00224400 | -3.03931000 | 4.18005000  |
| H  | 2.07198600  | 4.57764700  | -1.72500500 | H | -2.36892400 | -4.05836300 | 4.02582100  |
| C  | 6.31934400  | -2.96297500 | 0.08474100  | H | -1.43595000 | -3.02107100 | 5.11834000  |
| H  | 6.70824300  | -3.33844400 | -0.86657300 | H | -2.87113200 | -2.38574800 | 4.27672600  |
| H  | 7.16876400  | -2.74360800 | 0.73786500  | C | -0.03475500 | -3.68615200 | 2.75834200  |
| H  | 5.75150700  | -3.77946000 | 0.54733600  | H | 0.62826700  | -3.38992700 | 1.94041300  |
| C  | -4.07534100 | 4.98418000  | 0.25648500  | H | 0.57071800  | -3.86371700 | 3.65388200  |
| H  | -4.60227800 | 5.17499900  | -0.68270000 | H | -0.51677400 | -4.62636300 | 2.47693000  |
| H  | -4.66669200 | 4.25188700  | 0.81942400  | C | -1.54632400 | -0.16681400 | 3.67681200  |
| H  | -4.06530800 | 5.91119000  | 0.83747000  | H | -1.68468500 | -0.31435300 | 4.75230600  |

|                         |             |             |             |   |             |             |             |
|-------------------------|-------------|-------------|-------------|---|-------------|-------------|-------------|
| H                       | -1.17054400 | 0.84981200  | 3.51842800  | H | -4.23985200 | 3.54786900  | -0.31747500 |
| H                       | -2.51552500 | -0.25621400 | 3.18102100  | C | 4.57271800  | 3.88709300  | -1.08319000 |
| C                       | 0.80146700  | -1.06333400 | 3.80655100  | H | 4.89666800  | 4.73531300  | -0.47212900 |
| H                       | 1.56833400  | -1.66243100 | 3.31123300  | H | 5.12164900  | 3.00405800  | -0.73444100 |
| H                       | 1.13822600  | -0.02025900 | 3.82694900  | H | 4.87113800  | 4.07680700  | -2.11804100 |
| H                       | 0.71366300  | -1.40214000 | 4.84433200  | C | -6.88405300 | -2.28401600 | 0.41428800  |
| C                       | -3.76502000 | -1.12290300 | -0.54356600 | H | -7.87337400 | -1.83473100 | 0.56635400  |
| C                       | -4.20075800 | -2.44962800 | -0.71061300 | H | -6.95397700 | -2.93896800 | -0.45879500 |
| C                       | -4.72158000 | -0.10046600 | -0.67170800 | H | -6.67096000 | -2.90449800 | 1.28947900  |
| C                       | -5.53625700 | -2.73593600 | -0.98829000 | C | 0.41768000  | 3.68580600  | 1.77365200  |
| H                       | -3.47938000 | -3.25479400 | -0.61439100 | H | -0.49922000 | 4.28230100  | 1.72989600  |
| C                       | -6.05948100 | -0.38640500 | -0.94331700 | H | 0.15638200  | 2.70642100  | 2.18913200  |
| H                       | -4.40357200 | 0.93445600  | -0.55581200 | H | 1.09906400  | 4.16969900  | 2.47746900  |
| C                       | -6.47693500 | -1.70893300 | -1.10561600 | C | 0.16814200  | 2.57683500  | -3.19263500 |
| H                       | -5.84585300 | -3.77073800 | -1.11440700 | H | -0.11416700 | 1.51943700  | -3.13456500 |
| H                       | -6.77666100 | 0.42621300  | -1.03630100 | H | -0.75773400 | 3.15158600  | -3.30045300 |
| H                       | -7.51707900 | -1.93596800 | -1.32320300 | H | 0.76053700  | 2.71437600  | -4.10028200 |
| H                       | -2.12933900 | 0.27805500  | -0.39702400 | C | -3.53971700 | 0.94560600  | 2.39237200  |
| <b>L<sub>2</sub>-14</b> |             |             |             | H | -3.46156400 | 2.03552400  | 2.33318000  |
| C                       | -1.59028200 | 1.60607000  | -0.42083400 | H | -4.09267900 | 0.69512500  | 3.30088100  |
| C                       | -3.22924700 | 3.17926200  | -0.39056400 | H | -2.52385600 | 0.55136000  | 2.50855800  |
| C                       | -2.04810800 | 3.82573200  | -0.56033100 | C | -4.20274100 | 0.71237000  | -2.65084300 |
| N                       | -1.05666200 | 2.85158600  | -0.57591200 | H | -4.40960800 | 1.78054200  | -2.78052800 |
| N                       | -2.93200800 | 1.82373500  | -0.30737900 | H | -3.14132000 | 0.56362100  | -2.87591000 |
| C                       | 0.95576500  | 3.00095100  | -1.97568900 | H | -4.78600700 | 0.16608400  | -3.39565200 |
| C                       | 0.35445500  | 3.13264000  | -0.71405500 | C | 2.51174800  | -0.85475100 | 0.39050200  |
| C                       | 1.07329700  | 3.54538400  | 0.42119400  | N | 1.77720400  | -1.58531500 | 1.44391300  |
| C                       | 2.43761400  | 3.80326900  | 0.26469500  | C | 1.09130100  | -1.00552000 | 2.48528100  |
| C                       | 3.08536000  | 3.65832500  | -0.96708800 | C | -0.03535300 | -1.65380200 | 3.04904300  |
| C                       | 2.32522600  | 3.26943100  | -2.07446600 | C | 1.50061200  | 0.21862600  | 3.06401300  |
| H                       | 3.01146900  | 4.11563100  | 1.13351300  | C | -0.70525300 | -1.10522300 | 4.13911000  |
| H                       | 2.80810800  | 3.16869300  | -3.04319100 | H | -0.34944800 | -2.60550400 | 2.63096500  |
| C                       | -4.54353100 | 0.24042100  | -1.25714400 | C | 0.82263300  | 0.75265300  | 4.15916200  |
| C                       | -5.49464700 | -0.76403300 | -1.05676100 | H | 2.37496500  | 0.71889900  | 2.65877300  |
| C                       | -5.82986200 | -1.21948800 | 0.22324400  | C | -0.28813900 | 0.10431400  | 4.70786900  |
| C                       | -5.18649100 | -0.64417100 | 1.32341800  | H | -1.55838700 | -1.63478000 | 4.55799100  |
| C                       | -4.22538800 | 0.36272000  | 1.18069200  | H | 1.17643500  | 1.68285700  | 4.59889400  |
| C                       | -3.91766800 | 0.78481500  | -0.12308800 | H | -0.80617600 | 0.52169100  | 5.56629300  |
| H                       | -5.98493100 | -1.20048500 | -1.92352000 | B | 1.48593500  | -2.07148100 | 0.08545400  |
| H                       | -5.43470800 | -0.98698500 | 2.32486500  | C | 1.05486900  | -3.67120600 | -1.54836300 |
| Cu                      | -0.70129200 | -0.05596300 | -0.44422900 | O | 1.75612700  | -3.40815200 | -0.34199000 |
| H                       | -1.81866800 | 4.87368400  | -0.66841400 | C | -0.29870800 | -2.89326300 | -1.33884800 |
|                         |             |             |             | O | 0.17576400  | -1.71685500 | -0.61876300 |
|                         |             |             |             | C | 1.86840700  | -3.12561400 | -2.73809000 |

|                           |             |             |             |    |             |             |             |
|---------------------------|-------------|-------------|-------------|----|-------------|-------------|-------------|
| H                         | 2.86926500  | -3.56327000 | -2.69692600 | C  | 3.19629000  | -3.10429500 | -1.35064100 |
| H                         | 1.41861500  | -3.38089500 | -3.70363700 | C  | 4.04033100  | -3.04022500 | -0.23757800 |
| H                         | 1.97974300  | -2.03985300 | -2.67510200 | C  | 3.45943600  | -3.03141200 | 1.03477700  |
| C                         | 0.88746400  | -5.18636700 | -1.69102100 | C  | 2.07380600  | -3.04950100 | 1.21678200  |
| H                         | 0.44092700  | -5.62199200 | -0.79517500 | C  | 1.26297500  | -3.07928100 | 0.06974600  |
| H                         | 0.26967900  | -5.44519500 | -2.55848600 | H  | 3.63069600  | -3.12688400 | -2.34694400 |
| H                         | 1.87146800  | -5.64397100 | -1.82810900 | H  | 4.10028200  | -2.99341800 | 1.91206700  |
| C                         | -0.99918300 | -2.45480500 | -2.62378400 | Cu | -0.27853100 | -0.22223400 | -0.40502700 |
| H                         | -1.24084900 | -3.32525100 | -3.24316700 | H  | -3.15397100 | -4.24029600 | 0.83971600  |
| H                         | -1.94081000 | -1.94438900 | -2.39131000 | H  | -0.52214400 | -5.13055900 | 0.73369600  |
| H                         | -0.37299800 | -1.77864600 | -3.20990300 | C  | -6.93046800 | 0.88927400  | -0.10841700 |
| C                         | -1.27735400 | -3.64125500 | -0.42529600 | H  | -7.43641300 | 1.00185900  | 0.85483900  |
| H                         | -0.77164700 | -3.98593000 | 0.47944600  | H  | -6.66258800 | 1.89500300  | -0.45465000 |
| H                         | -2.09164000 | -2.96953200 | -0.13423300 | H  | -7.64760800 | 0.47805500  | -0.82501100 |
| H                         | -1.71617900 | -4.50640600 | -0.93240100 | C  | 5.53589500  | -2.93753800 | -0.40716000 |
| C                         | 3.99456400  | -0.93647400 | 0.34863500  | H  | 6.06844200  | -3.38130900 | 0.43934100  |
| C                         | 4.72107000  | -1.83190800 | 1.15087300  | H  | 5.87170300  | -3.43410600 | -1.32239100 |
| C                         | 4.71576800  | -0.12810600 | -0.55009400 | H  | 5.83426400  | -1.88407800 | -0.47202700 |
| C                         | 6.11052300  | -1.91292700 | 1.05782500  | C  | -3.04535400 | -0.81763700 | 2.62957900  |
| H                         | 4.17501900  | -2.46019900 | 1.84756100  | H  | -2.72294800 | -1.82715500 | 2.90285800  |
| C                         | 6.10446800  | -0.21152800 | -0.64548700 | H  | -2.14712200 | -0.19279900 | 2.57103300  |
| H                         | 4.17142900  | 0.56787400  | -1.18606200 | H  | -3.66260300 | -0.42606000 | 3.44180900  |
| C                         | 6.81419600  | -1.10547300 | 0.16100800  | C  | -3.65465400 | -2.35282300 | -2.18652300 |
| H                         | 6.64875400  | -2.61273600 | 1.69301700  | H  | -2.63618200 | -2.08762900 | -2.48860500 |
| H                         | 6.63533800  | 0.42159800  | -1.35342900 | H  | -3.65211400 | -3.42570300 | -1.96361700 |
| H                         | 7.89647100  | -1.17188200 | 0.09010400  | H  | -4.31547600 | -2.19013800 | -3.04120100 |
| H                         | 2.13763100  | 0.16101100  | 0.19678000  | C  | 1.48255600  | -3.03659800 | 2.60639000  |
| <b>L<sub>2</sub>-TS15</b> |             |             |             | H  | 1.03883900  | -4.00467900 | 2.86869500  |
| C                         | -0.93793300 | -1.93339400 | 0.06493800  | H  | 2.25200200  | -2.81382600 | 3.34899800  |
| C                         | -0.95120700 | -4.15574400 | 0.56593000  | H  | 0.69237200  | -2.28605600 | 2.70202700  |
| C                         | -2.23526500 | -3.72237200 | 0.61536800  | C  | 0.92757300  | -3.17433700 | -2.45469400 |
| N                         | -2.21182500 | -2.36452900 | 0.30723700  | H  | 0.12676100  | -3.91428100 | -2.35453400 |
| N                         | -0.17157000 | -3.05473200 | 0.22896500  | H  | 0.45187000  | -2.20463300 | -2.63966700 |
| C                         | -4.10785900 | -1.53538000 | -1.00000500 | H  | 1.51973100  | -3.43058100 | -3.33657300 |
| C                         | -3.39419500 | -1.54294500 | 0.21137900  | C  | 1.08729100  | 1.39343100  | 0.96023400  |
| C                         | -3.81175800 | -0.80387500 | 1.32968500  | N  | 1.98022900  | 2.22007700  | 0.13005100  |
| C                         | -4.97175700 | -0.03175000 | 1.20031900  | C  | 3.30378400  | 1.90590800  | -0.12312600 |
| C                         | -5.70338100 | 0.01703800  | 0.01024700  | C  | 3.91554500  | 2.30405400  | -1.33211200 |
| C                         | -5.25875100 | -0.74623800 | -1.07521400 | C  | 4.09428000  | 1.22435100  | 0.82568400  |
| H                         | -5.30917100 | 0.54598800  | 2.05725500  | C  | 5.25667300  | 2.02616700  | -1.57654800 |
| H                         | -5.82187100 | -0.72980400 | -2.00526700 | H  | 3.32301200  | 2.83950100  | -2.06733700 |
| C                         | 1.80426100  | -3.12337700 | -1.22601000 | C  | 5.43826600  | 0.95562800  | 0.57019800  |
|                           |             |             |             | H  | 3.64835900  | 0.93420400  | 1.77195000  |
|                           |             |             |             | C  | 6.03452500  | 1.34826300  | -0.63133500 |



|                         |             |             |             |    |             |             |             |
|-------------------------|-------------|-------------|-------------|----|-------------|-------------|-------------|
| H                       | 5.70180400  | 2.34494000  | -2.51625200 | C  | 4.15363000  | -0.13238400 | -1.06734600 |
| H                       | 6.02947100  | 0.44525900  | 1.32748600  | C  | 3.59791700  | 0.48595400  | 0.06666700  |
| H                       | 7.08393500  | 1.14356600  | -0.82252600 | C  | 3.76990700  | -0.03614300 | 1.35880200  |
| B                       | 0.69083200  | 2.13413400  | -0.53029800 | C  | 4.50960500  | -1.21726000 | 1.48872500  |
| C                       | -1.13266700 | 3.02323200  | -1.69648900 | C  | 5.06785000  | -1.87078400 | 0.38755100  |
| O                       | -0.13300100 | 3.28209500  | -0.71344500 | C  | 4.88512400  | -1.30825200 | -0.88051000 |
| C                       | -0.44100800 | 1.94657100  | -2.61812700 | H  | 4.64995800  | -1.63425100 | 2.48289200  |
| O                       | 0.36105900  | 1.20145000  | -1.65728100 | H  | 5.32090500  | -1.79694600 | -1.74879600 |
| C                       | -2.39851600 | 2.49648000  | -0.99603200 | C  | -0.68330200 | 3.82808900  | -1.64283300 |
| H                       | -2.70002600 | 3.22406500  | -0.23761600 | C  | -1.93758700 | 4.44482800  | -1.68535600 |
| H                       | -3.23111500 | 2.35518900  | -1.69313000 | C  | -2.53490600 | 4.98654600  | -0.54291200 |
| H                       | -2.21661300 | 1.54602000  | -0.48296100 | C  | -1.84051400 | 4.91088300  | 0.66916500  |
| C                       | -1.46104900 | 4.33940800  | -2.40824000 | C  | -0.58460300 | 4.30497400  | 0.76585100  |
| H                       | -0.55869300 | 4.82029400  | -2.78971800 | C  | -0.02453000 | 3.76823100  | -0.40483900 |
| H                       | -2.15791200 | 4.18331900  | -3.23954800 | H  | -2.46141700 | 4.49807000  | -2.63666200 |
| H                       | -1.92981300 | 5.02753500  | -1.69863200 | H  | -2.28877800 | 5.32915500  | 1.56715200  |
| C                       | -1.38911200 | 0.99268700  | -3.33850500 | Cu | 0.12920600  | 0.54572300  | 0.35648300  |
| H                       | -2.03853900 | 1.54521700  | -4.02617400 | H  | 4.54334200  | 3.05408500  | -0.37626700 |
| H                       | -0.81688700 | 0.26827600  | -3.92761100 | H  | 2.49810300  | 4.91364300  | -0.67216100 |
| H                       | -2.02150100 | 0.44402100  | -2.63727100 | C  | 5.82760300  | -3.16472600 | 0.55827500  |
| C                       | 0.54037800  | 2.56810900  | -3.62106600 | H  | 6.31928700  | -3.21464800 | 1.53423100  |
| H                       | 1.20194500  | 3.28298600  | -3.12635000 | H  | 5.15184400  | -4.02613000 | 0.49038800  |
| H                       | 1.15500000  | 1.77589400  | -4.05797500 | H  | 6.59146700  | -3.28758000 | -0.21540700 |
| H                       | 0.01561800  | 3.08512200  | -4.43029100 | C  | -3.90792800 | 5.61183900  | -0.60896000 |
| C                       | 0.65684800  | 1.91674700  | 2.28735500  | H  | -4.01122200 | 6.42955200  | 0.11072800  |
| C                       | 0.57534100  | 3.29677600  | 2.54764500  | H  | -4.12122200 | 6.00648700  | -1.60662500 |
| C                       | 0.29241200  | 1.03482800  | 3.32018300  | H  | -4.68461100 | 4.87318400  | -0.37623900 |
| C                       | 0.13763900  | 3.76618100  | 3.78503100  | C  | 3.18398000  | 0.62624000  | 2.58180300  |
| H                       | 0.86416000  | 3.99128100  | 1.76620400  | H  | 3.22901000  | 1.71725600  | 2.51746800  |
| C                       | -0.14879800 | 1.50475100  | 4.55825000  | H  | 2.13302500  | 0.34595100  | 2.71611400  |
| H                       | 0.37521700  | -0.03734100 | 3.15249600  | H  | 3.72386100  | 0.31311900  | 3.47923900  |
| C                       | -0.23212300 | 2.87735000  | 4.79866400  | C  | 3.97719600  | 0.44607800  | -2.45190700 |
| H                       | 0.08709800  | 4.83805900  | 3.96109600  | H  | 2.92916300  | 0.68639200  | -2.65531500 |
| H                       | -0.41391300 | 0.79663700  | 5.34022500  | H  | 4.54858300  | 1.37214200  | -2.58581000 |
| H                       | -0.57094400 | 3.24862800  | 5.76193300  | H  | 4.31774500  | -0.26296100 | -3.21042000 |
| H                       | 1.43302500  | 0.34936500  | 1.02611800  | C  | 0.12931200  | 4.21552500  | 2.09277800  |
| <b>L<sub>2</sub>-16</b> |             |             |             | H  | 1.12642300  | 4.66757500  | 2.05292900  |
| C                       | 1.49841800  | 1.82424600  | -0.10106000 | H  | -0.44139900 | 4.72499800  | 2.87276200  |
| C                       | 2.47413700  | 3.85208300  | -0.48395400 | H  | 0.26100500  | 3.17066400  | 2.39480600  |
| C                       | 3.47123500  | 2.94428700  | -0.34298800 | C  | -0.07492200 | 3.23164300  | -2.88898100 |
| N                       | 2.86179700  | 1.71378900  | -0.11279900 | H  | 0.93514300  | 3.61285500  | -3.07420100 |
| N                       | 1.27979300  | 3.15417500  | -0.33536000 | H  | 0.00270300  | 2.14217500  | -2.80351000 |
|                         |             |             |             | H  | -0.68827300 | 3.45890500  | -3.76418700 |
|                         |             |             |             | C  | -1.35149000 | -0.48675800 | 1.16287800  |

|   |             |             |             |                         |             |             |             |
|---|-------------|-------------|-------------|-------------------------|-------------|-------------|-------------|
| N | -2.16524400 | -1.28123000 | 0.20518900  | H                       | -2.01072200 | 0.29577700  | 1.55802200  |
| C | -3.55433600 | -1.41841000 | 0.48278900  |                         |             |             |             |
| C | -4.50196200 | -1.48381600 | -0.55684400 | <b>L<sub>2</sub>-17</b> |             |             |             |
| C | -4.02721400 | -1.44342400 | 1.80811800  | Cu                      | -0.36793100 | -0.20172700 | -0.72679100 |
| C | -5.86249700 | -1.59332100 | -0.27661500 | N                       | 2.39903100  | 0.53058300  | 0.06499100  |
| H | -4.16514700 | -1.45250400 | -1.58532100 | N                       | -2.74877400 | 0.94945600  | -2.14796400 |
| C | -5.39166700 | -1.54490300 | 2.07769700  | N                       | -2.74364900 | -1.20170200 | -2.14903900 |
| H | -3.32216200 | -1.40240800 | 2.62926700  | O                       | 4.87218700  | 0.94596900  | -0.09760400 |
| C | -6.32242000 | -1.62338800 | 1.04123800  | O                       | 4.06914000  | -1.14056800 | -0.62694300 |
| H | -6.56978600 | -1.64176600 | -1.10106900 | B                       | 3.74531100  | 0.14305000  | -0.21095000 |
| H | -5.72487100 | -1.56925800 | 3.11228500  | C                       | -2.03980100 | -0.12318800 | -1.68949100 |
| H | -7.38443200 | -1.70290800 | 1.25529800  | C                       | -3.86392500 | 0.54849100  | -2.87733900 |
| B | -1.55102500 | -1.88927300 | -0.91754100 | C                       | -3.86129400 | -0.80777300 | -2.87771700 |
| C | 0.05045300  | -2.37952000 | -2.48776100 | C                       | -2.37226500 | -2.57913600 | -1.92876900 |
| O | -0.18689400 | -1.79062800 | -1.18633400 | C                       | -2.95530100 | -3.27849400 | -0.85969500 |
| C | -1.18983200 | -3.33998900 | -2.65250100 | C                       | -2.58795800 | -4.61689000 | -0.68131600 |
| O | -2.20059100 | -2.67094800 | -1.86583000 | H                       | -3.03042300 | -5.17311200 | 0.14143400  |
| C | 0.05816000  | -1.23411300 | -3.51099100 | C                       | -1.67191200 | -5.25352800 | -1.52402800 |
| H | 0.82367200  | -0.50845300 | -3.22223000 | C                       | -1.12436100 | -4.52229000 | -2.58369200 |
| H | 0.28527000  | -1.58956200 | -4.52093300 | H                       | -0.41775800 | -5.00424300 | -3.25508800 |
| H | -0.90685200 | -0.71957500 | -3.53222200 | C                       | -1.45831100 | -3.18384300 | -2.80848700 |
| C | 1.41004500  | -3.07553900 | -2.46652400 | C                       | -0.83896100 | -2.41995900 | -3.95393400 |
| H | 1.46793600  | -3.81506100 | -1.66631800 | H                       | -1.59547500 | -1.91884900 | -4.56693900 |
| H | 1.60869100  | -3.57476600 | -3.42135800 | C                       | -3.93151600 | -2.61887200 | 0.08333900  |
| H | 2.19942400  | -2.33853300 | -2.29446800 | H                       | -4.73533500 | -2.10443300 | -0.45318700 |
| C | -1.71100100 | -3.49305700 | -4.08127100 | C                       | -2.39408400 | 2.33204600  | -1.93110600 |
| H | -0.94960900 | -3.93731800 | -4.73145500 | C                       | -3.02791500 | 3.04068200  | -0.89828400 |
| H | -2.58306700 | -4.15342100 | -4.08279500 | C                       | -4.02845200 | 2.38168800  | 0.02035000  |
| H | -2.01715300 | -2.53443000 | -4.50440600 | H                       | -4.82823600 | 1.87925900  | -0.53384300 |
| C | -0.97281300 | -4.72581000 | -2.02634300 | C                       | -2.68531000 | 4.38606200  | -0.72940500 |
| H | -0.59246600 | -4.64510400 | -1.00406200 | H                       | -3.16416300 | 4.95008700  | 0.06723100  |
| H | -1.93347900 | -5.24627600 | -1.98648200 | C                       | -1.74129600 | 5.01801300  | -1.54353800 |
| H | -0.27385900 | -5.33299500 | -2.61004600 | C                       | -1.14206200 | 4.27643400  | -2.56645400 |
| C | -0.78906900 | -1.25393800 | 2.32433900  | H                       | -0.40857900 | 4.75391600  | -3.21146600 |
| C | -0.43050100 | -2.61389500 | 2.25578700  | C                       | -1.45047000 | 2.93110000  | -2.78178000 |
| C | -0.56205400 | -0.59764600 | 3.55488000  | C                       | -0.77238700 | 2.15493400  | -3.88497100 |
| C | 0.13294600  | -3.27492800 | 3.34787100  | H                       | -1.49341800 | 1.61832700  | -4.51086200 |
| H | -0.60365800 | -3.15828100 | 1.33297500  | C                       | 1.39296000  | -0.56864500 | 0.08821000  |
| C | 0.00430500  | -1.25556500 | 4.64467300  | H                       | 1.75495300  | -1.31125600 | -0.63159300 |
| H | -0.84862900 | 0.44870600  | 3.65061900  | C                       | 2.01398400  | 1.84913500  | 0.39783400  |
| C | 0.36113800  | -2.60443000 | 4.55120100  | C                       | 0.83624100  | 2.09864400  | 1.13164300  |
| H | 0.39149500  | -4.32772400 | 3.25742900  | H                       | 0.22171300  | 1.26534700  | 1.44875300  |
| H | 0.15429000  | -0.71637100 | 5.57757100  | C                       | 0.45904400  | 3.39887400  | 1.47208300  |
| H | 0.79720300  | -3.12228900 | 5.40081100  |                         |             |             |             |



|   |             |             |             |                         |             |             |             |
|---|-------------|-------------|-------------|-------------------------|-------------|-------------|-------------|
| C | 2.80670300  | -1.16967700 | -1.83193700 | C                       | -1.85129300 | 2.27206000  | 1.66563900  |
| C | 4.15357300  | -1.28636800 | -1.45133300 | H                       | -1.20899500 | 2.75866800  | 0.93628600  |
| C | 5.04789900  | -0.08030900 | -1.30305800 | C                       | -2.59725600 | 3.04980000  | 2.54510400  |
| H | 5.07159200  | 0.52477800  | -2.21594500 | H                       | -2.53126400 | 4.13388400  | 2.48806000  |
| C | 4.65246100  | -2.57271400 | -1.21418600 | C                       | -3.43046700 | 2.44884300  | 3.49667600  |
| H | 5.69160900  | -2.67918000 | -0.91262500 | H                       | -4.01232100 | 3.05616100  | 4.18418900  |
| C | 3.86000600  | -3.71495800 | -1.35595000 | C                       | -3.49888900 | 1.05798200  | 3.54429800  |
| C | 2.53273100  | -3.55510900 | -1.76853800 | H                       | -4.14060000 | 0.57011300  | 4.27425600  |
| H | 1.90449600  | -4.43255800 | -1.90090500 | C                       | -2.74956600 | 0.27559700  | 2.66030500  |
| C | 1.98433500  | -2.29453800 | -2.01912800 | H                       | -2.82400500 | -0.80505200 | 2.71449100  |
| C | 0.55465300  | -2.15827300 | -2.48341200 | H                       | 6.07174600  | -0.38951200 | -1.07814700 |
| H | 0.48553800  | -1.56617100 | -3.40283600 | H                       | 4.69918700  | 0.56434300  | -0.49011400 |
| C | -1.07872000 | 0.07273600  | 0.73217100  | H                       | 0.12224700  | -3.14233700 | -2.67909200 |
| H | -1.20883200 | 0.52645800  | -0.25190800 | H                       | -0.06607900 | -1.66292900 | -1.73023200 |
| C | -0.85036300 | -2.38478100 | 1.35328900  | H                       | -2.46929700 | 2.40998100  | -3.36200400 |
| C | 0.54247600  | -2.55251000 | 1.32346700  | H                       | -1.98403000 | 1.23620200  | -2.14148300 |
| H | 1.14798900  | -1.87817900 | 0.72619200  | H                       | 2.75863600  | 5.18895900  | -0.24019900 |
| C | 1.15683200  | -3.57533900 | 2.04481300  | H                       | 2.73980100  | 3.44483400  | 0.07138200  |
| H | 2.23746400  | -3.68065000 | 1.99927000  | C                       | 4.41442400  | -5.08969500 | -1.06538400 |
| C | 0.39288100  | -4.46578400 | 2.80348300  | H                       | 4.03882400  | -5.47053800 | -0.10788900 |
| H | 0.87177600  | -5.26375300 | 3.36382600  | H                       | 4.11980300  | -5.81078400 | -1.83496300 |
| C | -0.99413400 | -4.31844800 | 2.82699800  | H                       | 5.50650900  | -5.07826000 | -1.01069300 |
| H | -1.60586700 | -5.00237400 | 3.40931600  | C                       | -2.04086700 | 6.49673800  | -0.51195200 |
| C | -1.61000500 | -3.28800300 | 2.11468000  | H                       | -2.59625400 | 6.26308500  | 0.40469800  |
| H | -2.68919800 | -3.18688800 | 2.13306500  | H                       | -1.43957000 | 7.38844600  | -0.31314400 |
| C | -4.15619500 | -2.81325500 | -1.42872700 | H                       | -2.77882800 | 6.74681200  | -1.28061700 |
| C | -5.36517200 | -3.68233900 | -1.08619700 | C                       | 0.43193700  | 0.06523800  | 3.54119100  |
| H | -5.05582500 | -4.72915600 | -1.01444000 | H                       | -0.29473300 | -0.72358800 | 3.41362100  |
| H | -6.13331600 | -3.60891700 | -1.86346300 | H                       | 0.06925900  | 1.08244900  | 3.44882400  |
| H | -5.80704000 | -3.39586600 | -0.13024300 | Br                      | 3.09257500  | 1.23652300  | 1.64358900  |
| C | -3.44248700 | -3.37115800 | -2.66846900 | C                       | 1.70033100  | -0.19659700 | 4.00108200  |
| H | -2.58082500 | -2.75471100 | -2.93979200 | H                       | 2.02690000  | -1.23058000 | 4.08530800  |
| H | -4.11206300 | -3.43074700 | -3.53216700 | C                       | 2.65077700  | 0.81900100  | 4.13834900  |
| H | -3.08078700 | -4.37819600 | -2.44271000 | H                       | 2.33600500  | 1.85252200  | 4.21932900  |
| C | -4.44763500 | -1.26577900 | -1.52374700 | H                       | 3.66276000  | 0.60074800  | 4.46097900  |
| C | -4.71447500 | -0.74188800 | -2.93365500 | H                       | 1.66654500  | 2.71529300  | -4.03710200 |
| H | -4.87792600 | 0.33924000  | -2.89862000 | H                       | 3.02214100  | 0.28819100  | -4.14886900 |
| H | -5.61182700 | -1.20429100 | -3.35861000 |                         |             |             |             |
| H | -3.87331300 | -0.93525700 | -3.60200500 | <b>L<sub>2</sub>-19</b> |             |             |             |
| C | -5.55683000 | -0.79987100 | -0.57004700 |                         |             |             |             |
| H | -5.38106100 | -1.16110600 | 0.44683200  | Cu                      | 0.90353200  | 0.71481200  | 0.91096500  |
| H | -6.54391300 | -1.14130300 | -0.89674200 | N                       | -1.02790900 | -1.66805300 | 0.57967400  |
| H | -5.56049000 | 0.29295300  | -0.53881400 | N                       | 2.15972700  | 0.81499400  | -1.95540600 |
| C | -1.90527400 | 0.86104600  | 1.69892500  | N                       | 0.61439100  | 2.30511100  | -1.83008200 |

|   |             |             |             |   |             |             |             |
|---|-------------|-------------|-------------|---|-------------|-------------|-------------|
| O | -2.40903300 | -3.51284900 | -0.35537600 | C | -4.35326000 | -4.78177400 | -1.02284300 |
| O | -3.00261500 | -1.35087900 | -0.87621000 | H | -3.78836700 | -5.71721600 | -1.07020200 |
| B | -2.11649700 | -2.17114700 | -0.19395800 | H | -5.18612900 | -4.85311500 | -1.73051100 |
| C | 1.16273000  | 1.26166600  | -1.12722400 | H | -4.75922800 | -4.68476800 | -0.01440700 |
| C | 2.23683900  | 1.56814300  | -3.12423600 | C | -2.72412900 | -3.88063400 | -2.70765300 |
| C | 1.26751500  | 2.50636200  | -3.04402700 | H | -2.07190500 | -3.04657500 | -2.98210500 |
| C | -0.56843700 | 3.07083600  | -1.49901400 | H | -3.43430500 | -4.04913800 | -3.52296400 |
| C | -0.43276600 | 4.32670400  | -0.87625500 | H | -2.10381300 | -4.77469900 | -2.60081000 |
| C | -1.60277500 | 5.03702900  | -0.58570000 | C | -4.10996200 | -2.18797900 | -1.30704600 |
| H | -1.51261100 | 6.00081900  | -0.09077500 | C | -4.64061300 | -1.65748300 | -2.63705100 |
| C | -2.87134500 | 4.56064800  | -0.93182900 | H | -5.05890300 | -0.65696900 | -2.49349700 |
| C | -2.95378500 | 3.35295200  | -1.62832800 | H | -5.43714500 | -2.30333000 | -3.02132200 |
| H | -3.92593700 | 2.98785300  | -1.95153500 | H | -3.85324300 | -1.59099500 | -3.39002400 |
| C | -1.81869700 | 2.59422300  | -1.93563100 | C | -5.19510000 | -2.08206300 | -0.22673300 |
| C | -1.97574600 | 1.32395700  | -2.73860200 | H | -4.83720300 | -2.46298200 | 0.73363400  |
| H | -1.06948500 | 1.07042700  | -3.29277500 | H | -6.09892600 | -2.63234300 | -0.50522100 |
| C | 0.91464300  | 4.93655500  | -0.58554700 | H | -5.45780100 | -1.02954300 | -0.09129600 |
| H | 1.45842600  | 5.14148800  | -1.51614200 | C | -1.85787100 | 0.36044900  | 1.80041800  |
| C | 2.99458300  | -0.35067400 | -1.77392100 | C | -2.16011000 | 1.73709600  | 1.76967100  |
| C | 4.33502000  | -0.19035700 | -1.38329700 | H | -1.73049300 | 2.36016200  | 0.99130000  |
| C | 4.93609000  | 1.16688000  | -1.11953600 | C | -2.99633500 | 2.31154300  | 2.72183500  |
| H | 4.95918800  | 1.77632900  | -2.03107000 | H | -3.21069800 | 3.37584900  | 2.67289600  |
| C | 5.12199200  | -1.34483900 | -1.28004000 | C | -3.55915000 | 1.52819400  | 3.73516300  |
| H | 6.15756500  | -1.23822600 | -0.96704900 | H | -4.21257100 | 1.97690800  | 4.47795000  |
| C | 4.62520800  | -2.61571100 | -1.57823200 | C | -3.27144100 | 0.16493900  | 3.77925900  |
| C | 3.29878500  | -2.72428700 | -2.01101200 | H | -3.70086300 | -0.45720600 | 4.56019800  |
| H | 2.89893000  | -3.70151400 | -2.27028900 | C | -2.42960700 | -0.41239200 | 2.82571800  |
| C | 2.46699600  | -1.60759700 | -2.12503600 | H | -2.22017600 | -1.47486500 | 2.87329300  |
| C | 1.04978300  | -1.75950700 | -2.62406600 | H | 5.96407900  | 1.06542000  | -0.76273600 |
| H | 0.84929800  | -1.09232900 | -3.46969200 | H | 4.35942600  | 1.71782200  | -0.37045100 |
| C | -0.94681500 | -0.21105600 | 0.76088700  | H | 0.86887600  | -2.78616600 | -2.95141200 |
| H | -1.16186900 | 0.26049100  | -0.19448300 | H | 0.32024800  | -1.52292500 | -1.84326900 |
| C | -0.16038700 | -2.60773100 | 1.23347300  | H | -2.78924500 | 1.44206400  | -3.46136100 |
| C | 1.22218600  | -2.58546400 | 1.01578800  | H | -2.23471800 | 0.47115400  | -2.10306000 |
| H | 1.65204300  | -1.81631600 | 0.38536400  | H | 0.79598900  | 5.88503800  | -0.05573500 |
| C | 2.05034400  | -3.54684700 | 1.59611400  | H | 1.54134200  | 4.27548500  | 0.01951000  |
| H | 3.11943700  | -3.50816100 | 1.40712800  | C | 5.49269600  | -3.84503900 | -1.44367700 |
| C | 1.51179400  | -4.55256800 | 2.40070800  | H | 5.18359400  | -4.45493700 | -0.58622000 |
| H | 2.15711500  | -5.30167800 | 2.85025000  | H | 5.42238800  | -4.48256900 | -2.33148500 |
| C | 0.13403500  | -4.58513700 | 2.61852800  | H | 6.54340600  | -3.57967600 | -1.29911600 |
| H | -0.30230500 | -5.36145400 | 3.24092100  | C | -4.11797500 | 5.33200800  | -0.56907600 |
| C | -0.69442300 | -3.62155500 | 2.04312400  | H | -4.55545200 | 4.95152600  | 0.36224800  |
| H | -1.76640000 | -3.66613100 | 2.20000400  | H | -3.90376100 | 6.39421400  | -0.42021400 |
| C | -3.43655800 | -3.61184600 | -1.37473200 | H | -4.88441200 | 5.24345600  | -1.34536800 |

|    |            |             |             |
|----|------------|-------------|-------------|
| C  | 0.88541000 | 0.14405700  | 2.89750500  |
| H  | 0.12339100 | -0.62228100 | 2.97350300  |
| H  | 0.54444300 | 1.09367200  | 3.31003300  |
| Br | 2.59100900 | 2.40265900  | 1.44517600  |
| C  | 2.17729100 | -0.32250100 | 3.41080500  |
| H  | 2.44711000 | -1.34751900 | 3.16505300  |
| C  | 2.99948400 | 0.38444200  | 4.20448900  |
| H  | 2.78381100 | 1.41280800  | 4.47610600  |
| H  | 3.91324000 | -0.05048100 | 4.60014500  |
| H  | 0.96877300 | 3.28571000  | -3.72641800 |
| H  | 2.96346500 | 1.35412500  | -3.89134300 |

**L<sub>2</sub>-TS20**

|    |             |             |             |
|----|-------------|-------------|-------------|
| Cu | -1.08889500 | -0.22439000 | 0.68716200  |
| N  | 1.67884700  | 1.46517200  | 0.26139900  |
| N  | -3.13684600 | -0.66376600 | -1.58864900 |
| N  | -1.32994000 | -1.76821300 | -1.94664000 |
| O  | 3.76620600  | 2.51778100  | -0.55595200 |
| O  | 3.76451000  | 0.23224700  | -0.28661600 |
| B  | 3.04083300  | 1.40254400  | -0.17828200 |
| C  | -1.87836400 | -0.86142900 | -1.07602000 |
| C  | -3.35407600 | -1.42284500 | -2.73567700 |
| C  | -2.21627300 | -2.11800300 | -2.96104800 |
| C  | -0.02407900 | -2.37731200 | -1.85008400 |
| C  | 0.08508200  | -3.64690700 | -1.25256500 |
| C  | 1.35430100  | -4.23395200 | -1.20954400 |
| H  | 1.45723300  | -5.21186600 | -0.74570900 |
| C  | 2.48317600  | -3.60781100 | -1.74647900 |
| C  | 2.32126100  | -2.36546700 | -2.36536200 |
| H  | 3.18284100  | -1.87359100 | -2.80776200 |
| C  | 1.07741500  | -1.73060800 | -2.43452700 |
| C  | 0.94743600  | -0.38924500 | -3.11664500 |
| H  | 0.02928700  | -0.31479100 | -3.70657300 |
| C  | -1.10903200 | -4.36140700 | -0.67291300 |
| H  | -1.93238400 | -4.42853500 | -1.39208900 |
| C  | -4.17882100 | 0.17678900  | -1.04846800 |
| C  | -5.07764900 | -0.36766700 | -0.11426100 |
| C  | -4.95734400 | -1.78945800 | 0.37098900  |
| H  | -4.90127900 | -2.49464400 | -0.46569400 |
| C  | -6.11062500 | 0.45767000  | 0.34517300  |
| H  | -6.81492700 | 0.05208800  | 1.06764500  |
| C  | -6.26722400 | 1.77490900  | -0.09818700 |
| C  | -5.37194200 | 2.26298900  | -1.05539500 |

|   |             |             |             |
|---|-------------|-------------|-------------|
| H | -5.49569200 | 3.27399500  | -1.43634700 |
| C | -4.32927500 | 1.47703200  | -1.55663100 |
| C | -3.43988600 | 2.00239300  | -2.65823100 |
| H | -3.64966700 | 1.50075900  | -3.61078900 |
| C | 1.07971300  | 0.25083400  | 0.83276900  |
| H | 0.96353700  | -0.52583500 | 0.07080000  |
| C | 0.98779400  | 2.71044000  | 0.09538200  |
| C | -0.13182900 | 2.81993200  | -0.73830200 |
| H | -0.50685000 | 1.93009900  | -1.23272700 |
| C | -0.76240300 | 4.05277600  | -0.92041200 |
| H | -1.62869500 | 4.11951600  | -1.57149000 |
| C | -0.27741800 | 5.19615700  | -0.28425800 |
| H | -0.76649700 | 6.15462800  | -0.43170600 |
| C | 0.84550800  | 5.09633400  | 0.53933000  |
| H | 1.23530900  | 5.97813000  | 1.04006200  |
| C | 1.47150500  | 3.86521100  | 0.72890000  |
| H | 2.35104800  | 3.79087100  | 1.35900400  |
| C | 5.00653100  | 2.04582900  | -1.14140700 |
| C | 6.11420200  | 3.03411600  | -0.78091400 |
| H | 5.90184800  | 4.00495500  | -1.23814600 |
| H | 7.08398300  | 2.68888600  | -1.15463100 |
| H | 6.18769100  | 3.17905800  | 0.29824500  |
| C | 4.80362900  | 2.01431400  | -2.66253100 |
| H | 4.01423000  | 1.31039100  | -2.94078800 |
| H | 5.72089300  | 1.73391000  | -3.18920500 |
| H | 4.50236900  | 3.00983600  | -2.99977200 |
| C | 5.15089200  | 0.60994700  | -0.50086300 |
| C | 5.81021800  | -0.43620000 | -1.39670300 |
| H | 5.82319900  | -1.40206900 | -0.88380000 |
| H | 6.84565800  | -0.15871900 | -1.62089400 |
| H | 5.27298400  | -0.55969100 | -2.33866500 |
| C | 5.83352500  | 0.62628900  | 0.87372800  |
| H | 5.37738900  | 1.36746200  | 1.53513300  |
| H | 6.90288400  | 0.84331600  | 0.79014200  |
| H | 5.71196800  | -0.35360800 | 1.34247200  |
| C | 1.80915700  | -0.30039400 | 2.00671900  |
| C | 1.84168800  | -1.69064900 | 2.21503000  |
| H | 1.32326900  | -2.34499400 | 1.52337200  |
| C | 2.52035000  | -2.23277400 | 3.30369300  |
| H | 2.52927200  | -3.30972600 | 3.44539700  |
| C | 3.17913000  | -1.40105300 | 4.21212400  |
| H | 3.70713600  | -1.82580300 | 5.06131600  |
| C | 3.15308800  | -0.01780100 | 4.01994800  |
| H | 3.66174400  | 0.63954900  | 4.72017200  |

|    |             |             |             |
|----|-------------|-------------|-------------|
| C  | 2.47486400  | 0.52605900  | 2.93046300  |
| H  | 2.47292000  | 1.60179300  | 2.78374400  |
| H  | -5.82369200 | -2.05827800 | 0.98078800  |
| H  | -4.05292000 | -1.93493100 | 0.97558500  |
| H  | -3.60286800 | 3.07242400  | -2.80941600 |
| H  | -2.38092700 | 1.84000300  | -2.44459100 |
| H  | 1.79485300  | -0.21750300 | -3.78572200 |
| H  | 0.93430600  | 0.42752500  | -2.38723100 |
| H  | -0.83706900 | -5.37732000 | -0.37555800 |
| H  | -1.48096200 | -3.83166900 | 0.21312000  |
| C  | -7.37300500 | 2.64838200  | 0.44688200  |
| H  | -7.06279900 | 3.14529900  | 1.37446900  |
| H  | -7.65291300 | 3.43135900  | -0.26396300 |
| H  | -8.26763300 | 2.06236100  | 0.67819700  |
| C  | 3.84581500  | -4.25047700 | -1.64595000 |
| H  | 4.36907700  | -3.91050800 | -0.74376700 |
| H  | 3.77239900  | -5.34054600 | -1.58937600 |
| H  | 4.47514600  | -3.99464400 | -2.50383600 |
| C  | -0.60111000 | 1.10901000  | 2.20391100  |
| H  | 0.17833700  | 1.85681100  | 2.25422400  |
| H  | -0.55148800 | 0.37591600  | 3.00343700  |
| Br | -1.70608100 | -2.16543800 | 2.26843000  |
| C  | -1.92267000 | 1.67589300  | 1.90881600  |
| H  | -1.93669200 | 2.58807800  | 1.31768500  |
| C  | -3.09356600 | 1.15075200  | 2.33245200  |
| H  | -3.12317600 | 0.22226100  | 2.89384000  |
| H  | -4.03446700 | 1.64308000  | 2.10904800  |
| H  | -1.94909400 | -2.82304600 | -3.73172500 |
| H  | -4.29178000 | -1.39528400 | -3.26707600 |

**L<sub>2</sub>-21**

|    |             |             |             |
|----|-------------|-------------|-------------|
| Cu | 0.00003100  | 1.19442200  | -0.00108100 |
| Br | 0.00015600  | 3.43631500  | -0.00294900 |
| C  | -0.00004500 | -0.70265900 | 0.00115000  |
| N  | -1.07673100 | -1.54203600 | 0.00246300  |
| N  | 1.07663500  | -1.54204500 | 0.00221800  |
| C  | -0.67853000 | -2.87496300 | 0.00432600  |
| C  | 0.67842300  | -2.87496900 | 0.00415600  |
| H  | -1.39087000 | -3.68447500 | 0.00560100  |
| H  | 1.39075700  | -3.68448700 | 0.00525000  |
| C  | 2.45303500  | -1.10589700 | 0.00111200  |
| C  | 3.10018300  | -0.90602700 | -1.22874000 |
| C  | 3.10159400  | -0.90420700 | 1.22990900  |

|   |             |             |             |
|---|-------------|-------------|-------------|
| C | 4.43585700  | -0.49471300 | -1.20170200 |
| C | 4.43724400  | -0.49293600 | 1.20072300  |
| C | 5.11944100  | -0.27779600 | -0.00103900 |
| H | 4.95174600  | -0.33426300 | -2.14520300 |
| H | 4.95422200  | -0.33106100 | 2.14338400  |
| C | -2.45311700 | -1.10584000 | 0.00150700  |
| C | -3.10131500 | -0.90936400 | -1.22825200 |
| C | -3.10060900 | -0.90070200 | 1.23038200  |
| C | -4.43702500 | -0.49791400 | -1.20119400 |
| C | -4.43619700 | -0.48947300 | 1.20121600  |
| C | -5.11949800 | -0.27765700 | -0.00060000 |
| H | -4.95372600 | -0.34004800 | -2.14467500 |
| H | -4.95234900 | -0.32498300 | 2.14388900  |
| C | 2.38398000  | -1.10074100 | 2.54349600  |
| H | 1.58009500  | -0.36617900 | 2.66445100  |
| H | 1.92729400  | -2.09355200 | 2.61723000  |
| H | 3.07519600  | -0.98335200 | 3.38126300  |
| C | 2.38107200  | -1.10436200 | -2.54123700 |
| H | 1.92274100  | -2.09659100 | -2.61238200 |
| H | 1.57826600  | -0.36875300 | -2.66307700 |
| H | 3.07170500  | -0.98988500 | -3.37989100 |
| C | 6.54979100  | 0.20636100  | -0.00226300 |
| H | 7.09008900  | -0.14083600 | -0.88789200 |
| H | 6.58977300  | 1.30247100  | -0.00427600 |
| H | 7.09053400  | -0.13762600 | 0.88433800  |
| C | -2.38182200 | -1.09339300 | 2.54389200  |
| H | -1.92112700 | -2.08427600 | 2.61824900  |
| H | -1.58086900 | -0.35546200 | 2.66397600  |
| H | -3.07322900 | -0.97802500 | 3.38179000  |
| C | -2.38338700 | -1.11149500 | -2.54082100 |
| H | -1.92835600 | -2.10532600 | -2.61105000 |
| H | -3.07399400 | -0.99576400 | -3.37931800 |
| H | -1.57819300 | -0.37872200 | -2.66385000 |
| C | -6.54986500 | 0.20645800  | -0.00137500 |
| H | -7.08575600 | -0.12691200 | -0.89488000 |
| H | -7.09494800 | -0.15132300 | 0.87715300  |
| H | -6.58995700 | 1.30246000  | 0.01383800  |

**L<sub>2</sub>-22**

|   |             |             |             |
|---|-------------|-------------|-------------|
| C | 0.05266100  | -1.22952400 | -0.50715000 |
| C | -0.60900500 | -2.03180100 | -2.52179200 |
| C | 0.74874500  | -1.99308700 | -2.52537900 |
| N | 1.13641500  | -1.49936100 | -1.28545700 |

|    |             |             |             |                            |             |             |             |
|----|-------------|-------------|-------------|----------------------------|-------------|-------------|-------------|
| N  | -1.01785000 | -1.56043900 | -1.28006000 | O                          | -0.15227700 | 3.16765500  | -0.06904100 |
| C  | 3.21499800  | -2.27928500 | -0.24550300 | C                          | -0.21900700 | 4.37639600  | -0.75125100 |
| C  | 2.50182400  | -1.25136300 | -0.88428200 | C                          | -0.04813200 | 4.15242500  | -2.27312300 |
| C  | 3.06557700  | 0.00811600  | -1.14845300 | H                          | -0.82765300 | 3.48011900  | -2.64717400 |
| C  | 4.38837500  | 0.21700300  | -0.74054700 | H                          | -0.10748000 | 5.09070700  | -2.83866600 |
| C  | 5.13260400  | -0.77224700 | -0.09129500 | H                          | 0.92370600  | 3.69215200  | -2.48070400 |
| C  | 4.53137200  | -2.01452800 | 0.14063400  | C                          | -1.58888200 | 5.04992400  | -0.49964000 |
| H  | 4.84485500  | 1.18368400  | -0.93812700 | H                          | -1.72055300 | 5.23675600  | 0.57296900  |
| H  | 5.09910700  | -2.79823100 | 0.63637600  | H                          | -1.69524100 | 6.00583000  | -1.02830800 |
| C  | -3.03818300 | -2.44809200 | -0.21018300 | H                          | -2.39618400 | 4.38472700  | -0.82550500 |
| C  | -4.36226700 | -2.25535500 | 0.18917100  | C                          | 0.90383600  | 5.32177100  | -0.26240600 |
| C  | -5.03971100 | -1.05479800 | -0.05707400 | H                          | 1.87943000  | 4.84588600  | -0.41224200 |
| C  | -4.36075300 | -0.03211000 | -0.72389700 | H                          | 0.90623900  | 6.28664100  | -0.78559200 |
| C  | -3.03210300 | -0.16870600 | -1.14603000 | H                          | 0.78550400  | 5.51713300  | 0.81054800  |
| C  | -2.39349900 | -1.38920400 | -0.87275500 | Li                         | -0.10534700 | 2.44122500  | 1.44887600  |
| H  | -4.87495200 | -3.06153100 | 0.70847800  | Br                         | -0.00039900 | 0.71068700  | 3.18737400  |
| H  | -4.87317900 | 0.90565900  | -0.92306700 |                            |             |             |             |
| Cu | 0.03443300  | -0.46375300 | 1.22820400  | <b>L<sub>2</sub>- TS23</b> |             |             |             |
| H  | 1.46685800  | -2.25981900 | -3.28415800 | C                          | 0.03396900  | -1.07841700 | -0.40991000 |
| H  | -1.31476300 | -2.33909100 | -3.27679000 | C                          | -0.58566900 | -2.59570700 | -1.98733200 |
| C  | 6.54482000  | -0.50039600 | 0.36980400  | C                          | 0.76564400  | -2.64854700 | -1.88450600 |
| H  | 7.03412900  | 0.24901900  | -0.25894900 | N                          | 1.12939400  | -1.71607100 | -0.91679700 |
| H  | 6.55306000  | -0.11902800 | 1.39827200  | N                          | -1.01676500 | -1.63449600 | -1.07956400 |
| H  | 7.15372500  | -1.40927300 | 0.35488000  | C                          | 2.96301200  | -1.99289800 | 0.69392800  |
| C  | -6.47951500 | -0.88412100 | 0.36617800  | C                          | 2.49194600  | -1.45951700 | -0.51734600 |
| H  | -7.15904600 | -1.38404100 | -0.33520200 | C                          | 3.31289700  | -0.70043500 | -1.36844400 |
| H  | -6.65878900 | -1.31838800 | 1.35472300  | C                          | 4.63195500  | -0.46932300 | -0.96681000 |
| H  | -6.76257600 | 0.17121700  | 0.40280400  | C                          | 5.13728600  | -0.96694500 | 0.23830800  |
| C  | 2.29172600  | 1.10739100  | -1.83495400 | C                          | 4.29020200  | -1.72984900 | 1.04793900  |
| H  | 1.74848700  | 0.73722700  | -2.71035900 | H                          | 5.27725000  | 0.12122800  | -1.61249700 |
| H  | 1.55228300  | 1.58178600  | -1.17468600 | H                          | 4.66959500  | -2.13556000 | 1.98267700  |
| H  | 2.97330700  | 1.89211400  | -2.17283500 | C                          | -3.15269000 | -2.11837900 | 0.01730800  |
| C  | 2.58679300  | -3.62520500 | 0.02865500  | C                          | -4.49507000 | -1.79365800 | 0.22300100  |
| H  | 2.21229300  | -4.09613700 | -0.88684800 | C                          | -5.09179200 | -0.69212400 | -0.40225400 |
| H  | 3.31301900  | -4.30320100 | 0.48293500  | C                          | -4.30837700 | 0.09629700  | -1.24814300 |
| H  | 1.73589200  | -3.53543600 | 0.71319300  | C                          | -2.95691900 | -0.18275800 | -1.49110500 |
| C  | -2.33161600 | 0.96878400  | -1.84854300 | C                          | -2.40354000 | -1.30103200 | -0.84825700 |
| H  | -3.06466300 | 1.69509000  | -2.20902000 | H                          | -5.08619500 | -2.41246600 | 0.89384300  |
| H  | -1.63603800 | 1.50945800  | -1.19000500 | H                          | -4.75445400 | 0.95834300  | -1.73817200 |
| H  | -1.75484200 | 0.62011100  | -2.71115700 | Cu                         | -0.13386000 | 0.23977900  | 0.95914000  |
| C  | -2.32713400 | -3.74898100 | 0.07865200  | H                          | 1.49542300  | -3.25343400 | -2.39816600 |
| H  | -1.93767300 | -4.21295000 | -0.83424200 | H                          | -1.27417300 | -3.13943600 | -2.61410100 |
| H  | -1.47408100 | -3.59690500 | 0.74929700  | C                          | 6.55406200  | -0.66670300 | 0.66628000  |
| H  | -3.00561000 | -4.46085700 | 0.55442400  |                            |             |             |             |



|                                     |             |             |             |   |             |             |             |
|-------------------------------------|-------------|-------------|-------------|---|-------------|-------------|-------------|
| H                                   | 7.21441300  | -0.53693200 | -0.19622800 | N | -1.42489100 | 3.04591900  | -1.27729500 |
| H                                   | 6.59722000  | 0.25961100  | 1.25221900  | N | -2.77511500 | 1.50456300  | -1.93049800 |
| H                                   | 6.96210000  | -1.46642700 | 1.29142400  | O | 4.77177500  | -1.08522000 | 0.18592500  |
| C                                   | -6.55407400 | -0.38262700 | -0.18416500 | O | 3.44738100  | -2.04199700 | -1.43035200 |
| H                                   | -7.18956300 | -1.00773000 | -0.82395900 | B | 3.48209000  | -1.22072100 | -0.31118800 |
| H                                   | -6.85208600 | -0.57229900 | 0.85169500  | C | -1.58034200 | 1.68968400  | -1.29137000 |
| H                                   | -6.78084800 | 0.66137300  | -0.41720400 | C | -2.49331200 | 3.68940400  | -1.89269000 |
| C                                   | 2.80198600  | -0.14800500 | -2.67769100 | C | -3.34464000 | 2.71795600  | -2.30613000 |
| H                                   | 2.63147000  | -0.94061100 | -3.41579900 | C | -3.38107600 | 0.22208800  | -2.19415800 |
| H                                   | 1.85396700  | 0.38135300  | -2.54600200 | C | -4.41952000 | -0.22193200 | -1.35800400 |
| H                                   | 3.52276700  | 0.55266500  | -3.10510900 | C | -5.00631000 | -1.45792200 | -1.64871900 |
| C                                   | 2.08275400  | -2.82328600 | 1.59722000  | H | -5.81392900 | -1.81389800 | -1.01350900 |
| H                                   | 1.55854200  | -3.60901600 | 1.04313800  | C | -4.58643400 | -2.24353900 | -2.72683300 |
| H                                   | 2.67854100  | -3.29881100 | 2.38006500  | C | -3.55734100 | -1.75828200 | -3.53989000 |
| H                                   | 1.31923400  | -2.20578000 | 2.08301900  | H | -3.22607400 | -2.34890300 | -4.39062100 |
| C                                   | -2.13710300 | 0.72292700  | -2.37383800 | C | -2.93959000 | -0.52705100 | -3.29747800 |
| H                                   | -2.79005700 | 1.32355000  | -3.01304500 | C | -1.83095600 | -0.03613900 | -4.19687000 |
| H                                   | -1.52918200 | 1.41125100  | -1.76707800 | H | -2.00572400 | 0.99079800  | -4.53460600 |
| H                                   | -1.45686100 | 0.15870000  | -3.01978300 | C | -4.88677100 | 0.58861300  | -0.17282000 |
| C                                   | -2.52859700 | -3.29422000 | 0.73032800  | H | -5.15554700 | 1.61203400  | -0.45390800 |
| H                                   | -2.11152100 | -4.02702200 | 0.03086700  | C | -0.29043000 | 3.73283600  | -0.70688900 |
| H                                   | -1.70998600 | -2.96895700 | 1.38172800  | C | -0.33249800 | 4.10532100  | 0.64631100  |
| H                                   | -3.26902700 | -3.80520000 | 1.35019100  | C | -1.51795000 | 3.77810400  | 1.52098200  |
| O                                   | -0.36658900 | 2.80344900  | -0.33091400 | H | -2.46478100 | 4.07791100  | 1.05960200  |
| C                                   | 0.54562700  | 3.61880800  | -1.00234100 | C | 0.77873700  | 4.76976300  | 1.17072900  |
| C                                   | 0.41436400  | 3.43080200  | -2.53102200 | H | 0.76979600  | 5.05247200  | 2.21997600  |
| H                                   | -0.60278300 | 3.67872600  | -2.85341100 | C | 1.90567700  | 5.05573800  | 0.39368500  |
| H                                   | 1.11594700  | 4.06239700  | -3.09003400 | C | 1.89900900  | 4.67983200  | -0.95256800 |
| H                                   | 0.60562500  | 2.38681800  | -2.80203500 | H | 2.76515200  | 4.89955200  | -1.57201400 |
| C                                   | 0.26908600  | 5.10531800  | -0.66830700 | C | 0.81285600  | 4.01339900  | -1.52777500 |
| H                                   | 0.38276300  | 5.27505100  | 0.41083800  | C | 0.84619000  | 3.59453400  | -2.97827900 |
| H                                   | 0.94987500  | 5.79300100  | -1.18592300 | H | -0.00896800 | 3.98731600  | -3.53934700 |
| H                                   | -0.75813700 | 5.36441200  | -0.94967700 | C | 1.01097400  | -1.07125800 | -0.37246300 |
| C                                   | 1.98819500  | 3.27231200  | -0.56779100 | H | 1.24384100  | -1.32927200 | -1.41160700 |
| H                                   | 2.20123500  | 2.21982000  | -0.78129700 | C | 2.29928100  | 0.28456800  | 1.30816500  |
| H                                   | 2.74138000  | 3.88821900  | -1.07610400 | C | 1.15412500  | 0.44833900  | 2.11265500  |
| H                                   | 2.09817200  | 3.41890400  | 0.51286400  | H | 0.26854200  | -0.14148900 | 1.91365500  |
| Li                                  | -1.03989900 | 2.85307500  | 1.23631300  | C | 1.14782800  | 1.34023100  | 3.18610900  |
| Br                                  | -0.71370400 | 1.25044600  | 2.98653100  | H | 0.24659000  | 1.42229100  | 3.78801000  |
|                                     |             |             |             | C | 2.27870500  | 2.09450500  | 3.49636300  |
| <b>L<sub>2</sub>-17<sub>2</sub></b> |             |             |             | H | 2.27745200  | 2.77735500  | 4.34139800  |
|                                     |             |             |             | C | 3.41905500  | 1.94240100  | 2.70290300  |
| Cu                                  | -0.31902000 | 0.35396900  | -0.69272100 | H | 4.31621700  | 2.51650100  | 2.92413500  |
| N                                   | 2.30179500  | -0.62527300 | 0.22446400  | C | 3.43284400  | 1.06256600  | 1.62294600  |

|   |             |             |             |
|---|-------------|-------------|-------------|
| H | 4.32927800  | 0.96206300  | 1.02621600  |
| C | 5.67685100  | -1.69192100 | -0.76840000 |
| C | 6.83081900  | -2.33254900 | 0.00140000  |
| H | 7.40698000  | -1.55621500 | 0.51359100  |
| H | 7.50717700  | -2.86359600 | -0.67717100 |
| H | 6.47041600  | -3.03409200 | 0.75585400  |
| C | 6.20604200  | -0.56567000 | -1.66852400 |
| H | 5.39337700  | -0.09298500 | -2.22758400 |
| H | 6.95224200  | -0.92996900 | -2.38149800 |
| H | 6.67535400  | 0.19802500  | -1.04177300 |
| C | 4.73166000  | -2.69879400 | -1.52904000 |
| C | 5.05805300  | -2.90743300 | -3.00720200 |
| H | 4.33049200  | -3.59483800 | -3.44868500 |
| H | 6.05471800  | -3.34449500 | -3.13109500 |
| H | 5.01555400  | -1.96965800 | -3.56434300 |
| C | 4.60150300  | -4.05526700 | -0.82116700 |
| H | 4.36122100  | -3.92586700 | 0.23764500  |
| H | 5.51850300  | -4.64713300 | -0.90269900 |
| H | 3.78421100  | -4.61646700 | -1.28208000 |
| C | 0.45014200  | -2.32120200 | 0.24866000  |
| C | -0.58363700 | -3.02288300 | -0.41064200 |
| H | -0.96609000 | -2.63080600 | -1.35137100 |
| C | -1.11589200 | -4.19990700 | 0.10590500  |
| H | -1.90393700 | -4.71628000 | -0.43781100 |
| C | -0.63873100 | -4.72664800 | 1.31284400  |
| H | -1.05036200 | -5.64777400 | 1.71563000  |
| C | 0.38005300  | -4.04836800 | 1.98181300  |
| H | 0.77611000  | -4.44509800 | 2.91431400  |
| C | 0.91578500  | -2.86520000 | 1.46051100  |
| H | 1.71868100  | -2.36552800 | 1.99249400  |
| H | -1.43488600 | 4.28672900  | 2.48444700  |
| H | -1.57793800 | 2.70147400  | 1.71477400  |
| H | 1.75867600  | 3.95252900  | -3.46105700 |
| H | 0.81930000  | 2.50325500  | -3.07337600 |
| H | -1.74051300 | -0.67435400 | -5.07920000 |
| H | -0.86881800 | -0.04320600 | -3.67225600 |
| H | -5.76502900 | 0.12685400  | 0.28537400  |
| H | -4.10898900 | 0.66137200  | 0.59550500  |
| C | 3.11375500  | 5.71736900  | 1.01054800  |
| H | 3.75874700  | 6.16879200  | 0.25130800  |
| H | 2.82540500  | 6.49727800  | 1.72254300  |
| H | 3.70987900  | 4.97879500  | 1.55968100  |
| C | -5.21459800 | -3.59077600 | -2.99424900 |
| H | -5.20060300 | -3.83523400 | -4.06052400 |

|    |             |             |             |
|----|-------------|-------------|-------------|
| H  | -4.67164300 | -4.38734700 | -2.47071800 |
| H  | -6.25254800 | -3.62424000 | -2.65035600 |
| C  | -2.83354900 | -1.86352100 | 2.65005400  |
| Br | -2.77475200 | 0.07648800  | 3.20146700  |
| C  | -3.52817800 | -2.67000000 | 3.68663800  |
| C  | -2.93646000 | -3.65888400 | 4.35993300  |
| H  | -3.47947700 | -4.25087700 | 5.09062100  |
| H  | -1.89424800 | -3.91395400 | 4.18992100  |
| H  | -4.57391400 | -2.42872900 | 3.86913500  |
| H  | -3.36096600 | -1.83307300 | 1.69731600  |
| H  | -1.79594400 | -2.15230300 | 2.49641400  |
| H  | -2.54374100 | 4.76346800  | -1.97417400 |
| H  | -4.28793400 | 2.77089500  | -2.82591300 |

### L<sub>2</sub>-TS18<sub>2</sub>

|    |             |             |             |
|----|-------------|-------------|-------------|
| Cu | -1.01574300 | 0.18844200  | 0.49698500  |
| N  | 1.95102300  | -0.16339500 | 0.59238000  |
| N  | -1.40132100 | 1.91381500  | -2.08488700 |
| N  | -2.17949600 | -0.07287200 | -2.31599000 |
| O  | 4.35132600  | -0.30313300 | -0.14702400 |
| O  | 2.83409800  | -1.77718500 | -1.04305800 |
| B  | 3.02768600  | -0.71363800 | -0.17013000 |
| C  | -1.54150600 | 0.73230700  | -1.41108700 |
| C  | -1.93730400 | 1.84319500  | -3.36879000 |
| C  | -2.43285300 | 0.59109900  | -3.51485400 |
| C  | -2.57581600 | -1.43607800 | -2.06795300 |
| C  | -3.82133000 | -1.67674400 | -1.45949500 |
| C  | -4.19163900 | -3.00616700 | -1.23434500 |
| H  | -5.15312700 | -3.20835700 | -0.76793600 |
| C  | -3.37073900 | -4.07728600 | -1.60495300 |
| C  | -2.15565800 | -3.79426000 | -2.23532300 |
| H  | -1.51605400 | -4.61481400 | -2.55169500 |
| C  | -1.73347700 | -2.48171800 | -2.48104600 |
| C  | -0.41239200 | -2.22694100 | -3.16881200 |
| H  | -0.48153400 | -1.41648600 | -3.89976300 |
| C  | -4.74357600 | -0.54459500 | -1.07388000 |
| H  | -4.94643500 | 0.11382000  | -1.92562400 |
| C  | -0.76708300 | 3.10470000  | -1.57045400 |
| C  | -1.56462100 | 4.12474700  | -1.02861000 |
| C  | -3.06590800 | 4.00122100  | -0.94213700 |
| H  | -3.51422900 | 3.74564800  | -1.90826200 |
| C  | -0.91724200 | 5.26947900  | -0.55071800 |

|   |             |             |             |                                     |             |             |             |
|---|-------------|-------------|-------------|-------------------------------------|-------------|-------------|-------------|
| H | -1.51886500 | 6.06528900  | -0.11833900 | H                                   | 0.69721100  | -5.12596200 | 4.09566600  |
| C | 0.47156400  | 5.41213200  | -0.60307200 | C                                   | 1.54112900  | -3.19076400 | 3.62050100  |
| C | 1.22418500  | 4.38586600  | -1.18288700 | H                                   | 2.18986900  | -3.16954500 | 4.49310900  |
| H | 2.30474900  | 4.48527500  | -1.24412400 | C                                   | 1.55850000  | -2.11579300 | 2.73192400  |
| C | 0.62835400  | 3.22344900  | -1.67692900 | H                                   | 2.22263000  | -1.27925800 | 2.92029200  |
| C | 1.46400300  | 2.13586000  | -2.30647700 | H                                   | -3.50806600 | 4.94155200  | -0.60334600 |
| H | 1.10488800  | 1.88053300  | -3.30993800 | H                                   | -3.34609000 | 3.21697300  | -0.23042000 |
| C | 0.71340700  | -0.98304900 | 0.60885000  | H                                   | 2.50577100  | 2.45456300  | -2.39046900 |
| H | 0.59313800  | -1.40100300 | -0.39014100 | H                                   | 1.43689800  | 1.22086800  | -1.70689600 |
| C | 2.05679600  | 0.99885900  | 1.39938600  | H                                   | -0.07750600 | -3.12729800 | -3.69077500 |
| C | 1.13820700  | 1.24566200  | 2.43690700  | H                                   | 0.37246500  | -1.95256100 | -2.45490700 |
| H | 0.35464700  | 0.52702100  | 2.64318400  | H                                   | -5.69987800 | -0.93531800 | -0.71650400 |
| C | 1.22288700  | 2.40222600  | 3.21387900  | H                                   | -4.31190000 | 0.08165600  | -0.28505100 |
| H | 0.48793100  | 2.56016400  | 3.99821100  | C                                   | 1.15212800  | 6.62922500  | -0.02425300 |
| C | 2.23266800  | 3.33745300  | 2.99607200  | H                                   | 1.97348700  | 6.97254200  | -0.66178700 |
| H | 2.30283200  | 4.23158400  | 3.60878400  | H                                   | 0.45160500  | 7.45904500  | 0.10566500  |
| C | 3.15732000  | 3.09521700  | 1.97715800  | H                                   | 1.57924900  | 6.39770400  | 0.95899300  |
| H | 3.95686200  | 3.80752300  | 1.78766200  | C                                   | -3.78579900 | -5.50205800 | -1.32274500 |
| C | 3.07252500  | 1.95327100  | 1.18458800  | H                                   | -3.50510900 | -5.79925800 | -0.30472300 |
| H | 3.80232800  | 1.79055700  | 0.40343900  | H                                   | -4.86941100 | -5.62811200 | -1.40910500 |
| C | 5.05700200  | -1.01760300 | -1.19291600 | H                                   | -3.30532400 | -6.20331200 | -2.01103900 |
| C | 6.47293600  | -1.31299100 | -0.70129000 | C                                   | -2.46722600 | -1.12379400 | 2.39373900  |
| H | 7.01433700  | -0.37384000 | -0.55441100 | Br                                  | -2.81339800 | 1.41365900  | 1.80543500  |
| H | 7.02480500  | -1.91074800 | -1.43457100 | C                                   | -2.56896500 | -0.95319200 | 3.81387800  |
| H | 6.46355900  | -1.84716400 | 0.25016900  | C                                   | -1.58080800 | -1.30348600 | 4.66662700  |
| C | 5.10678800  | -0.09431200 | -2.41861500 | H                                   | -1.70661100 | -1.19568700 | 5.73983200  |
| H | 4.10137600  | 0.13009400  | -2.78583300 | H                                   | -0.63774500 | -1.70882200 | 4.31340200  |
| H | 5.68457900  | -0.53553800 | -3.23654700 | H                                   | -3.49714600 | -0.54045000 | 4.20126200  |
| H | 5.58282300  | 0.84823000  | -2.13348300 | H                                   | -3.37127300 | -1.23535500 | 1.81120700  |
| C | 4.14130300  | -2.28362600 | -1.40668700 | H                                   | -1.58022300 | -1.60805600 | 2.00706000  |
| C | 4.07941800  | -2.80641000 | -2.84088400 | H                                   | -2.93473800 | 0.11307100  | -4.34107000 |
| H | 3.40090600  | -3.66320000 | -2.88925800 | H                                   | -1.91160000 | 2.68309500  | -4.04474800 |
| H | 5.06657600  | -3.13911300 | -3.17887000 |                                     |             |             |             |
| H | 3.71216400  | -2.04563900 | -3.53225800 | <b>L<sub>2</sub>-19<sub>2</sub></b> |             |             |             |
| C | 4.46234900  | -3.43288200 | -0.44027600 |                                     |             |             |             |
| H | 4.50465100  | -3.08052900 | 0.59391600  | Cu                                  | 1.01445900  | -0.75136500 | 0.81249100  |
| H | 5.41305400  | -3.91672100 | -0.68464000 | N                                   | -1.20534100 | 1.09364300  | 0.59034200  |
| H | 3.66671300  | -4.17999200 | -0.50444500 | N                                   | -0.16140100 | -2.44725100 | -1.74234200 |
| C | 0.74242800  | -2.10348700 | 1.57699600  | N                                   | 1.77873100  | -1.56017100 | -1.99226600 |
| C | -0.07948200 | -3.23809300 | 1.36436400  | O                                   | -3.13499900 | 2.57759400  | 0.00480700  |
| H | -0.69036100 | -3.28158800 | 0.46465000  | O                                   | -1.26233800 | 2.64411000  | -1.32631600 |
| C | -0.09675900 | -4.30773000 | 2.25749400  | B                                   | -1.87577800 | 2.06646400  | -0.22650600 |
| H | -0.73553700 | -5.16403600 | 2.05442400  | C                                   | 0.70962400  | -1.58380000 | -1.13201400 |
| C | 0.70743300  | -4.29191600 | 3.40013200  | C                                   | 0.36010100  | -2.94741700 | -2.93347200 |

|   |             |             |             |    |             |             |             |
|---|-------------|-------------|-------------|----|-------------|-------------|-------------|
| C | 1.58334800  | -2.39259800 | -3.09063400 | H  | -3.89281500 | 1.88758600  | -2.48288000 |
| C | 2.96764200  | -0.75362700 | -1.84724000 | H  | -4.73732800 | 3.40513500  | -2.84558400 |
| C | 4.10357400  | -1.31343500 | -1.23364600 | H  | -5.26076100 | 2.39815800  | -1.48371600 |
| C | 5.24286100  | -0.50964600 | -1.11897500 | C  | -2.03338000 | 3.82248000  | -1.68354800 |
| H | 6.12570300  | -0.92590300 | -0.63985100 | C  | -2.00282900 | 3.97783500  | -3.20288500 |
| C | 5.28447800  | 0.79732600  | -1.61483600 | H  | -0.97649900 | 4.16646200  | -3.53105200 |
| C | 4.15426000  | 1.29228200  | -2.27268800 | H  | -2.61887600 | 4.82555600  | -3.52050400 |
| H | 4.18371500  | 2.28964000  | -2.70547100 | H  | -2.35914400 | 3.07926500  | -3.70968200 |
| C | 2.98404800  | 0.53583400  | -2.40922800 | C  | -1.34356200 | 5.02225500  | -1.01954500 |
| C | 1.80617000  | 1.10001100  | -3.17111100 | H  | -1.33210200 | 4.92559000  | 0.06914000  |
| H | 1.35542400  | 0.35287700  | -3.83078100 | H  | -1.83087500 | 5.96588600  | -1.28303900 |
| C | 4.12192600  | -2.74263800 | -0.75039400 | H  | -0.30477000 | 5.06378600  | -1.35778100 |
| H | 3.94521300  | -3.44042300 | -1.57731600 | C  | 0.83871500  | 2.38486000  | 1.17688900  |
| C | -1.52235000 | -2.75286800 | -1.35781800 | C  | 2.03043900  | 2.94751800  | 0.67317900  |
| C | -1.81338200 | -3.96519000 | -0.70963400 | H  | 2.52722000  | 2.46843000  | -0.16683400 |
| C | -0.74757600 | -4.98208000 | -0.39152600 | C  | 2.57402000  | 4.10620500  | 1.22164300  |
| H | -0.24548100 | -5.33085300 | -1.30203200 | H  | 3.49045200  | 4.51847700  | 0.80749700  |
| C | -3.15373100 | -4.22872500 | -0.40495000 | C  | 1.93943200  | 4.74515500  | 2.29116600  |
| H | -3.39333400 | -5.15466000 | 0.11208000  | H  | 2.35956300  | 5.65148400  | 2.71766600  |
| C | -4.18521300 | -3.35343700 | -0.75411500 | C  | 0.75395200  | 4.20929100  | 2.79625900  |
| C | -3.85802500 | -2.19807700 | -1.46970500 | H  | 0.24449900  | 4.69865300  | 3.62214200  |
| H | -4.65071600 | -1.52896900 | -1.79668500 | C  | 0.21046900  | 3.04413000  | 2.25040600  |
| C | -2.53530100 | -1.88134700 | -1.79122800 | H  | -0.71801100 | 2.65273300  | 2.65053500  |
| C | -2.22133200 | -0.66745300 | -2.63111500 | H  | -1.18762600 | -5.85318000 | 0.10031200  |
| H | -1.64124800 | -0.93709500 | -3.52104000 | H  | 0.01760800  | -4.56070800 | 0.26660700  |
| C | 0.26394800  | 1.17667500  | 0.51753400  | H  | -3.14555400 | -0.19398900 | -2.97108400 |
| H | 0.54424600  | 1.18917100  | -0.53222800 | H  | -1.63767700 | 0.07647600  | -2.08294800 |
| C | -1.88453800 | 0.37767500  | 1.61725400  | H  | 2.12722600  | 1.94407500  | -3.78735000 |
| C | -1.24924600 | 0.02313500  | 2.81648600  | H  | 1.01147000  | 1.46433700  | -2.51092500 |
| H | -0.22222800 | 0.30958900  | 2.99711900  | H  | 5.09328200  | -2.98420500 | -0.31185900 |
| C | -1.93526700 | -0.69122000 | 3.80096300  | H  | 3.34766200  | -2.93384400 | 0.00053000  |
| H | -1.41165600 | -0.95714700 | 4.71477300  | C  | -5.61448300 | -3.64636300 | -0.36562400 |
| C | -3.26814800 | -1.05342900 | 3.62239900  | H  | -6.32298400 | -3.19581200 | -1.06738800 |
| H | -3.79986100 | -1.60529100 | 4.39182600  | H  | -5.80872700 | -4.72250700 | -0.32752200 |
| C | -3.90677100 | -0.69881400 | 2.43147800  | H  | -5.83604200 | -3.24067800 | 0.62937200  |
| H | -4.94519000 | -0.97500400 | 2.26684400  | C  | 6.51978600  | 1.64949600  | -1.44558800 |
| C | -3.22629100 | -0.00413200 | 1.43590300  | H  | 6.58141900  | 2.42425700  | -2.21540800 |
| H | -3.73457300 | 0.24640400  | 0.51417900  | H  | 6.51687400  | 2.15427500  | -0.47164800 |
| C | -3.45661900 | 3.49628200  | -1.07142200 | H  | 7.43186400  | 1.04695300  | -1.49440700 |
| C | -4.18966100 | 4.69393100  | -0.46713800 | C  | 2.43294500  | -0.04752500 | 2.11216700  |
| H | -5.13870900 | 4.36145800  | -0.03701400 | Br | 1.34236300  | -2.98139500 | 1.81387100  |
| H | -4.40928500 | 5.44596200  | -1.23239200 | C  | 2.14555500  | -0.13321600 | 3.53890000  |
| H | -3.60709400 | 5.16242000  | 0.32745900  | C  | 2.08598200  | 0.92474100  | 4.37131100  |
| C | -4.38807300 | 2.75394200  | -2.03848900 | H  | 1.89070000  | 0.79327100  | 5.43194500  |

|                                       |             |             |             |   |             |             |             |
|---------------------------------------|-------------|-------------|-------------|---|-------------|-------------|-------------|
| H                                     | 2.24461600  | 1.94047700  | 4.02260400  | H | -0.96117200 | 0.35775900  | 0.01116100  |
| H                                     | 1.98343000  | -1.13454000 | 3.93152700  | C | -0.17151200 | -2.64784400 | 1.11231200  |
| H                                     | 3.12736400  | -0.81428700 | 1.76686100  | C | 1.21708700  | -2.47529600 | 1.09218100  |
| H                                     | 2.69448000  | 0.94604400  | 1.76309500  | H | 1.64052400  | -1.59292400 | 0.62426100  |
| H                                     | -0.19383200 | -3.63871600 | -3.54816400 | C | 2.06054000  | -3.42231500 | 1.67447400  |
| H                                     | 2.32563000  | -2.50229500 | -3.86503200 | H | 3.13375000  | -3.25771100 | 1.65575700  |
| <b>L<sub>2</sub>-TS20<sub>2</sub></b> |             |             |             |   |             |             |             |
| Cu                                    | 0.87309500  | 0.79471700  | 0.88648900  | C | 1.53108900  | -4.57504800 | 2.25715200  |
| N                                     | -1.05170100 | -1.67616500 | 0.52879300  | H | 2.18733300  | -5.31382400 | 2.70795400  |
| N                                     | 2.58375300  | 0.86695900  | -1.70356200 | C | 0.14848500  | -4.77138400 | 2.24768400  |
| N                                     | 1.02662900  | 2.34580900  | -1.75726000 | H | -0.27837700 | -5.66638800 | 2.69193900  |
| O                                     | -2.16353100 | -3.42438900 | -0.84348900 | C | -0.69669800 | -3.81509100 | 1.68580900  |
| O                                     | -2.80687300 | -1.23722300 | -1.15942800 | H | -1.77002000 | -3.96777600 | 1.69009500  |
| B                                     | -1.98346000 | -2.10753500 | -0.46612100 | C | -3.02625100 | -3.42405300 | -2.01121200 |
| C                                     | 1.47119000  | 1.27879100  | -1.01959600 | C | -3.91107800 | -4.66788500 | -1.95722900 |
| C                                     | 2.82355900  | 1.65687400  | -2.82532000 | H | -3.28963800 | -5.56405200 | -2.04129100 |
| C                                     | 1.84353100  | 2.58907600  | -2.85798200 | H | -4.62698900 | -4.67359900 | -2.78587200 |
| C                                     | -0.17230300 | 3.11414400  | -1.51171100 | H | -4.46351300 | -4.72865200 | -1.01804400 |
| C                                     | -0.07990100 | 4.33990000  | -0.82693400 | C | -2.11451700 | -3.47829900 | -3.24495300 |
| C                                     | -1.26597500 | 5.05260300  | -0.61402100 | H | -1.47896200 | -2.59037000 | -3.30781300 |
| H                                     | -1.21242900 | 5.99643400  | -0.07712400 | H | -2.68985000 | -3.55999400 | -4.17211200 |
| C                                     | -2.50346700 | 4.59895200  | -1.08029400 | H | -1.46486300 | -4.35412200 | -3.16473100 |
| C                                     | -2.53857500 | 3.41033500  | -1.81503100 | C | -3.78836200 | -2.05165100 | -1.86003200 |
| H                                     | -3.48449200 | 3.06149800  | -2.22284000 | C | -4.15391200 | -1.36509400 | -3.17358400 |
| C                                     | -1.38621000 | 2.65468300  | -2.05315000 | H | -4.64060500 | -0.40796100 | -2.96519500 |
| C                                     | -1.46960600 | 1.39943200  | -2.88862800 | H | -4.85327700 | -1.98053700 | -3.74915000 |
| H                                     | -0.56208200 | 1.23803500  | -3.47608200 | H | -3.27387300 | -1.17206300 | -3.78877500 |
| C                                     | 1.24018900  | 4.90029300  | -0.36290600 | C | -5.02321700 | -2.14100700 | -0.95286500 |
| H                                     | 1.94603300  | 4.99912900  | -1.19560000 | H | -4.78962300 | -2.64612400 | -0.01186800 |
| C                                     | 3.41866000  | -0.26683200 | -1.38388100 | H | -5.84412700 | -2.67580300 | -1.44004400 |
| C                                     | 4.64340500  | -0.05546700 | -0.72935400 | H | -5.36023900 | -1.12920600 | -0.71309600 |
| C                                     | 5.09869900  | 1.31992400  | -0.31213800 | C | -2.26918700 | 0.22700300  | 1.63174000  |
| H                                     | 5.15904800  | 2.00060300  | -1.16888300 | C | -2.51062200 | 1.61545800  | 1.68940300  |
| C                                     | 5.44592700  | -1.17713800 | -0.48086800 | H | -1.80212800 | 2.29996200  | 1.22930800  |
| H                                     | 6.39345900  | -1.03198300 | 0.03192800  | C | -3.63787700 | 2.12076200  | 2.32648800  |
| C                                     | 5.07207600  | -2.46339800 | -0.87646900 | H | -3.79707000 | 3.19508500  | 2.36276100  |
| C                                     | 3.85603900  | -2.62402300 | -1.55160800 | C | -4.56891300 | 1.25286100  | 2.91191300  |
| H                                     | 3.55227700  | -3.61595300 | -1.87744700 | H | -5.45518400 | 1.64831200  | 3.39996200  |
| C                                     | 3.01543100  | -1.54188200 | -1.82160200 | C | -4.34634600 | -0.12085700 | 2.86079900  |
| C                                     | 1.71472900  | -1.74729400 | -2.56010500 | H | -5.05773500 | -0.80555300 | 3.31487300  |
| H                                     | 1.63759300  | -1.08783000 | -3.43148800 | C | -3.19979900 | -0.62989000 | 2.24232100  |
| C                                     | -1.06885200 | -0.26100500 | 0.90689500  | H | -3.03549500 | -1.70065700 | 2.20740600  |
|                                       |             |             |             | H | 6.08942200  | 1.27040400  | 0.14645600  |
|                                       |             |             |             | H | 4.40433300  | 1.76474500  | 0.41032300  |
|                                       |             |             |             | H | 1.62891000  | -2.78021700 | -2.90554000 |

|                          |             |             |             |    |             |             |             |
|--------------------------|-------------|-------------|-------------|----|-------------|-------------|-------------|
| H                        | 0.85444700  | -1.53434600 | -1.91722200 | C  | 3.10597700  | -1.23621300 | -0.39688200 |
| H                        | -2.31358900 | 1.46788000  | -3.58108400 | C  | 2.45858000  | 0.00028900  | -0.58959900 |
| H                        | -1.63676000 | 0.51118600  | -2.27130200 | H  | 4.97645900  | 2.14139900  | 0.15871400  |
| H                        | 1.09846800  | 5.89131400  | 0.07560800  | H  | 4.97658200  | -2.14113100 | 0.15739100  |
| H                        | 1.70862300  | 4.25398000  | 0.38789600  | Cu | 0.00000100  | -0.00087700 | 1.71508300  |
| C                        | 5.95327600  | -3.65701000 | -0.59069700 | H  | -1.39033100 | 0.00133800  | -3.15837900 |
| H                        | 6.17895000  | -4.21432300 | -1.50673400 | H  | 1.39032700  | 0.00123400  | -3.15838100 |
| H                        | 6.90134200  | -3.35535000 | -0.13760800 | C  | -2.40423300 | -2.57730200 | -0.58643300 |
| H                        | 5.46218500  | -4.35631300 | 0.09626100  | H  | -1.36947500 | -2.38099600 | -0.88111900 |
| C                        | -3.77165900 | 5.37027800  | -0.80107200 | C  | -2.40425600 | 2.57780300  | -0.58507000 |
| H                        | -3.55891100 | 6.40744900  | -0.52736400 | H  | -1.36942800 | 2.38166500  | -0.87962400 |
| H                        | -4.43719100 | 5.37659000  | -1.67036400 | C  | 2.40432100  | -2.57726800 | -0.58654300 |
| H                        | -4.32927500 | 4.91757700  | 0.02813700  | H  | 1.36958500  | -2.38098900 | -0.88132200 |
| C                        | 0.30856700  | 0.03195700  | 2.88285700  | C  | 2.40416700  | 2.57783600  | -0.58496700 |
| Br                       | 2.40163700  | 2.39479000  | 2.08333600  | H  | 1.36932000  | 2.38167200  | -0.87943300 |
| C                        | -0.30500800 | -0.99772800 | 3.70432700  | Cl | 0.00000200  | -0.00190400 | 3.84042600  |
| C                        | -1.30286500 | -0.75580500 | 4.57478500  | H  | 6.15822600  | 0.00006700  | 0.49792200  |
| H                        | -1.68166700 | -1.53549000 | 5.22927600  | H  | -6.15822500 | -0.00005400 | 0.49792800  |
| H                        | -1.74378700 | 0.23052200  | 4.67987200  | C  | 3.05419200  | -3.40011400 | -1.71612400 |
| H                        | 0.11749300  | -1.99645900 | 3.65557200  | H  | 3.05132800  | -2.85288200 | -2.66468400 |
| H                        | 1.38850700  | -0.09751800 | 2.80467600  | H  | 4.09371900  | -3.65246500 | -1.48145300 |
| H                        | 0.02199200  | 1.04747400  | 3.14080500  | H  | 2.51069500  | -4.33931600 | -1.86442800 |
| H                        | 3.65900300  | 1.47525300  | -3.48224700 | C  | 2.35678000  | -3.37642400 | 0.73062100  |
| H                        | 1.64333700  | 3.39163900  | -3.54957000 | H  | 3.36217300  | -3.63893500 | 1.07684100  |
| <b>L<sub>3</sub>CuCl</b> |             |             |             | H  | 1.86731700  | -2.80435000 | 1.52431200  |
| C                        | 0.00000000  | -0.00001300 | -0.17579200 | H  | 1.80118900  | -4.30952400 | 0.58722300  |
| C                        | 0.67844500  | 0.00096100  | -2.34872400 | C  | -2.35680000 | -3.37651900 | 0.73069800  |
| C                        | -0.67844700 | 0.00092300  | -2.34872300 | H  | -1.86750800 | -2.80445600 | 1.52450000  |
| N                        | -1.07680500 | 0.00038100  | -1.01686900 | H  | -3.36222400 | -3.63916100 | 1.07673900  |
| N                        | 1.07680400  | 0.00039200  | -1.01687100 | H  | -1.80109900 | -4.30955700 | 0.58733400  |
| C                        | -3.10594400 | 1.23666000  | -0.39615200 | C  | -3.05398800 | -3.40011700 | -1.71610500 |
| C                        | -2.45858000 | 0.00025200  | -0.58959600 | H  | -4.09355000 | -3.65244600 | -1.48156600 |
| C                        | -3.10592900 | -1.23626500 | -0.39679300 | H  | -3.05098400 | -2.85287500 | -2.66465800 |
| C                        | -4.44949900 | -1.20587500 | -0.00411700 | H  | -2.51049100 | -4.33933100 | -1.86434800 |
| C                        | -5.11660800 | 0.00003700  | 0.18990300  | C  | -3.05383500 | 3.40106400  | -1.71451900 |
| C                        | -4.44951800 | 1.20605500  | -0.00349500 | H  | -3.05065800 | 2.85420900  | -2.66329600 |
| H                        | -4.97650700 | -2.14121800 | 0.15750800  | H  | -4.09344900 | 3.65324400  | -1.48005000 |
| H                        | -4.97653300 | 2.14131200  | 0.15860800  | H  | -2.51035400 | 4.34035900  | -1.86229200 |
| C                        | 3.10589600  | 1.23671300  | -0.39607100 | C  | -2.35708600 | 3.37646600  | 0.73240500  |
| C                        | 4.44947100  | 1.20613400  | -0.00343500 | H  | -3.36256700 | 3.63888600  | 1.07843800  |
| C                        | 5.11660900  | 0.00012700  | 0.18989700  | H  | -1.86786200 | 2.80408800  | 1.52602200  |
| C                        | 4.44954600  | -1.20579500 | -0.00418800 | H  | -1.80143000 | 4.30960400  | 0.58951000  |
|                          |             |             |             | C  | 2.35709900  | 3.37655500  | 0.73247800  |
|                          |             |             |             | H  | 1.86804000  | 2.80418400  | 1.52620200  |

|                        |             |             |             |    |             |             |             |
|------------------------|-------------|-------------|-------------|----|-------------|-------------|-------------|
| H                      | 3.36260800  | 3.63910300  | 1.07834100  | C  | 5.60136200  | -2.88804800 | 0.17988700  |
| H                      | 1.80133400  | 4.30963200  | 0.58962000  | H  | 5.03845200  | -3.75704800 | -0.17890900 |
| C                      | 3.05363400  | 3.40107300  | -1.71450000 | H  | 6.61736000  | -3.21558100 | 0.43537900  |
| H                      | 4.09328100  | 3.65323300  | -1.48015600 | H  | 5.11712800  | -2.52955000 | 1.09478400  |
| H                      | 3.05032500  | 2.85421100  | -2.66327100 | C  | 6.29077100  | -2.31382800 | -2.17051100 |
| H                      | 2.51015100  | 4.34037900  | -1.86221100 | H  | 6.29046400  | -1.53988200 | -2.94679200 |
| <b>L<sub>3</sub>-I</b> |             |             |             |    |             |             |             |
| C                      | -1.02324100 | 0.35821500  | 0.29248300  | H  | 7.33014400  | -2.61579100 | -1.98643000 |
| C                      | -2.47746300 | 0.62649200  | 2.01471800  | H  | 5.74403400  | -3.18180800 | -2.55674200 |
| C                      | -1.49166500 | 1.54801500  | 2.16676200  | C  | 6.36857800  | -0.54898100 | -0.37872400 |
| N                      | -0.61087400 | 1.36973600  | 1.10848300  | H  | 5.89054900  | -0.15667400 | 0.52565800  |
| N                      | -2.17593800 | -0.09273200 | 0.86492600  | H  | 7.41449500  | -0.78207300 | -0.14066300 |
| C                      | 0.51371700  | 3.31872300  | 0.12373200  | H  | 6.35437000  | 0.24297000  | -1.13590100 |
| C                      | 0.59371000  | 2.14895900  | 0.90435300  | Li | 2.90105300  | -1.19406500 | -2.06847700 |
| C                      | 1.79283100  | 1.70166700  | 1.49872300  | H  | 3.79563800  | 4.21915900  | 0.36231100  |
| C                      | 2.93857100  | 2.47673700  | 1.28449200  | H  | -5.14194400 | -4.09375200 | -0.95185500 |
| C                      | 2.89100800  | 3.63889100  | 0.51880700  | C  | -2.03545900 | -3.45413200 | 3.03998000  |
| C                      | 1.69249800  | 4.05414100  | -0.05274900 | H  | -2.52045200 | -4.41852600 | 2.85573700  |
| H                      | 3.88279000  | 2.15819400  | 1.71158800  | H  | -1.20107700 | -3.62934500 | 3.72697900  |
| H                      | 1.67014400  | 4.95873300  | -0.65262600 | H  | -2.76093300 | -2.80778900 | 3.54488900  |
| C                      | -4.03587900 | -0.89402600 | -0.52478400 | C  | -0.46695300 | -3.70921500 | 1.05412300  |
| C                      | -4.80695300 | -1.96954600 | -0.98217700 | H  | -0.88216200 | -4.68393600 | 0.77700800  |
| C                      | -4.53266000 | -3.27418100 | -0.58198300 | H  | -0.07523900 | -3.24199400 | 0.14553100  |
| C                      | -3.47723400 | -3.53147500 | 0.28804900  | H  | 0.37281000  | -3.88563800 | 1.73407000  |
| C                      | -2.67427100 | -2.49571800 | 0.78152600  | C  | -5.75016300 | 0.97145300  | -0.49653400 |
| C                      | -2.97708500 | -1.18583100 | 0.35827800  | H  | -6.54514200 | 0.34364900  | -0.91264200 |
| H                      | -5.63020500 | -1.78088300 | -1.66436600 | H  | -5.82380000 | 0.92053300  | 0.59475800  |
| H                      | -3.26904800 | -4.55354900 | 0.58905000  | H  | -5.94787900 | 2.00425700  | -0.80211000 |
| Cu                     | -0.17176900 | -0.25480500 | -1.28195500 | C  | -4.24369100 | 0.65467700  | -2.52083800 |
| H                      | -1.33691600 | 2.30644000  | 2.91677200  | H  | -3.24799200 | 0.36454700  | -2.86999400 |
| H                      | -3.35259700 | 0.41499600  | 2.60761300  | H  | -4.97579100 | 0.02447700  | -3.03655700 |
| C                      | 1.85824800  | 0.45333200  | 2.37490400  | H  | -4.42467500 | 1.69066300  | -2.82679900 |
| H                      | 1.00359800  | -0.18068900 | 2.11692600  | C  | -0.66529100 | 3.83543600  | -2.06092000 |
| C                      | -0.78148700 | 3.79871700  | -0.52446200 | H  | 0.09159300  | 4.55577700  | -2.38858200 |
| H                      | -1.57233200 | 3.08417300  | -0.27753200 | H  | -0.38919700 | 2.85593200  | -2.46324200 |
| C                      | -1.52522300 | -2.81726000 | 1.73231500  | H  | -1.62061800 | 4.13229100  | -2.50730800 |
| H                      | -1.03165100 | -1.87915100 | 2.00146200  | C  | -1.21620700 | 5.16915500  | 0.03160400  |
| C                      | -4.36067700 | 0.52229300  | -0.99001300 | H  | -1.33589900 | 5.14116400  | 1.11956100  |
| H                      | -3.62448200 | 1.20191000  | -0.55133700 | H  | -0.48207900 | 5.94740500  | -0.20167900 |
| Cl                     | 0.83445100  | -0.93225100 | -3.06971200 | H  | -2.17224400 | 5.47287800  | -0.40797800 |
| O                      | 4.28471800  | -1.42161000 | -1.19350100 | C  | 3.12928800  | -0.38441200 | 2.14744200  |
| C                      | 5.58664000  | -1.77921600 | -0.90018600 | H  | 3.04739000  | -1.32587800 | 2.70146000  |
|                        |             |             |             | H  | 3.30237700  | -0.62402400 | 1.09275000  |
|                        |             |             |             | H  | 4.02163100  | 0.12703500  | 2.52512900  |
|                        |             |             |             | C  | 1.72152800  | 0.83366100  | 3.86541800  |

H 2.54951200 1.47950500 4.17741800  
H 0.78742100 1.36684200 4.07044900  
H 1.74198200 -0.06449700 4.49183500

**L<sub>3</sub>-TS2**

C -0.17100800 -0.55721700 -0.41107300  
C -1.00341900 -1.35815200 -2.37322600  
C 0.29563200 -1.73991700 -2.29824700  
N 0.79408500 -1.23904000 -1.09945700  
N -1.27289400 -0.63913200 -1.21594100  
C 2.38757200 -2.46400800 0.31853500  
C 2.15105900 -1.46505400 -0.64862100  
C 3.19122800 -0.70699200 -1.22897000  
C 4.49671700 -0.96713600 -0.79535600  
C 4.75742900 -1.93249900 0.17262400  
C 3.71381500 -2.67155500 0.71922800  
H 5.31996100 -0.40130300 -1.21872400  
H 3.92907900 -3.42994000 1.46547900  
C -3.48275100 -0.94265900 -0.19061000  
C -4.74544800 -0.41631400 0.10555800  
C -5.09160900 0.87906300 -0.26829600  
C -4.17911100 1.67611200 -0.95231200  
C -2.90116500 1.20343300 -1.27792600  
C -2.57823900 -0.10964000 -0.88221400  
H -5.46498200 -1.03003000 0.63855100  
H -4.45971600 2.68414600 -1.24057200  
Cu -0.21462400 0.15869700 1.35449200  
H 0.90586600 -2.31681400 -2.97327700  
H -1.75290900 -1.52695800 -3.12933600  
C 2.94817600 0.33122600 -2.32224500  
H 1.88248500 0.58029200 -2.32068200  
C 1.28641500 -3.35147300 0.89234700  
H 0.32372600 -2.97253400 0.54054200  
C -1.94292400 2.09665000 -2.05899700  
H -0.97666300 1.58756300 -2.12072200  
C -3.14784400 -2.37386300 0.21937900  
H -2.09530200 -2.55692800 -0.01415300  
Cl -0.82069700 0.29794900 3.48841500  
O 0.37755100 3.11224900 1.67749400  
C 1.55880700 3.80897000 1.44762600  
C 1.61584400 4.30271100 -0.01585300  
H 0.78570600 4.98964400 -0.21081600  
H 2.55393800 4.82353800 -0.24595700

H 1.51319100 3.45320200 -0.69919100  
C 1.63896700 5.03971800 2.38340100  
H 1.62456600 4.71409100 3.43140700  
H 2.54899100 5.63318900 2.22739500  
H 0.77226100 5.68879500 2.21604200  
C 2.77449400 2.89354700 1.72657600  
H 2.71073100 1.99287100 1.10569600  
H 3.73488600 3.38763200 1.52896300  
H 2.76802600 2.57081000 2.77455300  
Li -0.48441200 2.46092200 2.97592800  
H 5.77809600 -2.11168000 0.49832200  
H -6.07651900 1.26815700 -0.02599700  
C -1.69909600 3.44347200 -1.35308000  
H -1.24609100 3.30811700 -0.36580700  
H -1.01307700 4.05340900 -1.95029600  
H -2.62827900 4.01364000 -1.24117600  
C -2.44794900 2.30354400 -3.50199900  
H -2.58596900 1.35035100 -4.02402900  
H -3.40825600 2.83055500 -3.51529200  
H -1.73138000 2.90296300 -4.07343200  
C 3.29688300 -0.24498300 -3.71147600  
H 3.09066500 0.49236300 -4.49469400  
H 4.35912000 -0.50701500 -3.76737000  
H 2.72255200 -1.14791300 -3.94052000  
C 3.72059300 1.64174200 -2.08646400  
H 4.80174300 1.50237700 -2.19211000  
H 3.41751900 2.38936000 -2.82662500  
H 3.52522100 2.05117300 -1.09341600  
C 1.24782800 -3.31686400 2.43143700  
H 0.41687900 -3.92821800 2.79895100  
H 2.16853400 -3.71598500 2.87018100  
H 1.10634600 -2.29864800 2.80468300  
C 1.42934500 -4.79713500 0.37290200  
H 0.60938700 -5.41963300 0.74695300  
H 1.41232500 -4.83458000 -0.72137900  
H 2.36997700 -5.24841000 0.70654800  
C -3.32021900 -2.59565000 1.73435200  
H -4.36610900 -2.48819100 2.04144200  
H -3.00343000 -3.60936500 2.00320600  
H -2.72384400 -1.88389000 2.31213400  
C -3.98004000 -3.38981000 -0.58899800  
H -5.05127600 -3.26985900 -0.39453500  
H -3.82329600 -3.27284400 -1.66650800  
H -3.70411500 -4.41399300 -0.31571500



**L<sub>3</sub>-3**

|    |             |             |             |
|----|-------------|-------------|-------------|
| O  | 0.03524600  | 2.79421500  | 1.28254700  |
| C  | -1.00090000 | 3.64927600  | 1.68231400  |
| C  | -1.95327600 | 3.94984900  | 0.50469900  |
| H  | -1.38355100 | 4.36236300  | -0.33494200 |
| H  | -2.43728300 | 3.02529100  | 0.16782000  |
| H  | -2.73825000 | 4.66716900  | 0.77638500  |
| C  | -0.35009000 | 4.96443100  | 2.15976100  |
| H  | -1.09438400 | 5.69727800  | 2.49436600  |
| H  | 0.33417700  | 4.75913700  | 2.98926800  |
| H  | 0.23224300  | 5.40679200  | 1.34500000  |
| C  | -1.80405100 | 3.02571300  | 2.84440500  |
| H  | -2.27087500 | 2.08956000  | 2.51580100  |
| H  | -1.13231500 | 2.79736900  | 3.67861400  |
| H  | -2.59523800 | 3.69300700  | 3.20986200  |
| C  | 0.16947900  | -0.53845700 | -0.24848600 |
| C  | -0.25195600 | -2.55981800 | -1.21606400 |
| C  | 1.09527300  | -2.41661600 | -1.15168700 |
| N  | 1.33689800  | -1.18151700 | -0.56012400 |
| N  | -0.80248300 | -1.40863800 | -0.66181400 |
| C  | 3.28107500  | -0.94566400 | 0.92159700  |
| C  | 2.65931600  | -0.65423900 | -0.30904600 |
| C  | 3.27965000  | 0.12011100  | -1.30962700 |
| C  | 4.56976500  | 0.59748200  | -1.04858500 |
| C  | 5.21135400  | 0.31940900  | 0.15465800  |
| C  | 4.57073600  | -0.44137200 | 1.12810900  |
| H  | 5.07434200  | 1.20170700  | -1.79638800 |
| H  | 5.07580800  | -0.64253100 | 2.06788700  |
| C  | -2.88230000 | -1.61043700 | 0.62597000  |
| C  | -4.26170800 | -1.38463600 | 0.71060200  |
| C  | -4.95341800 | -0.75587600 | -0.32051300 |
| C  | -4.27652400 | -0.33915600 | -1.46309400 |
| C  | -2.89717200 | -0.53730100 | -1.60172400 |
| C  | -2.22295700 | -1.17416700 | -0.54064700 |
| H  | -4.79911100 | -1.70413600 | 1.59835200  |
| H  | -4.82591100 | 0.15116100  | -2.26093900 |
| Cu | -0.00945700 | 1.15286900  | 0.54281200  |
| H  | 1.89616500  | -3.06634600 | -1.46588600 |
| H  | -0.86540600 | -3.35996700 | -1.59759500 |
| C  | 2.59826100  | 0.46715300  | -2.62943400 |
| H  | 1.61835800  | -0.01809800 | -2.64337500 |
| C  | 2.59870500  | -1.75235200 | 2.02187400  |

|   |             |             |             |
|---|-------------|-------------|-------------|
| H | 1.62725200  | -2.08540200 | 1.64570500  |
| C | -2.19035800 | -0.07724200 | -2.87330500 |
| H | -1.11906600 | -0.25864500 | -2.75058000 |
| C | -2.15855700 | -2.30835000 | 1.77322500  |
| H | -1.09725200 | -2.37054500 | 1.51758400  |
| C | 2.32970600  | -0.87742300 | 3.26255700  |
| H | 1.79497800  | -1.45458700 | 4.02505500  |
| H | 3.26438600  | -0.52103700 | 3.70885100  |
| H | 1.72497900  | -0.00259800 | 3.00541700  |
| C | 3.40275200  | -3.01374800 | 2.39032600  |
| H | 3.57113300  | -3.65223400 | 1.51679200  |
| H | 4.38159000  | -2.76014300 | 2.81100000  |
| H | 2.86397500  | -3.60112800 | 3.14147700  |
| C | -2.66860100 | -3.75055500 | 1.96344000  |
| H | -3.72624300 | -3.76851900 | 2.24728600  |
| H | -2.56101700 | -4.33783500 | 1.04552000  |
| H | -2.10405300 | -4.25308800 | 2.75611100  |
| C | -2.26219900 | -1.50252100 | 3.08230700  |
| H | -1.86175900 | -0.49240700 | 2.95727600  |
| H | -3.30060700 | -1.41512900 | 3.41970100  |
| H | -1.69623500 | -1.99888400 | 3.87813200  |
| C | -2.36767700 | 1.43424000  | -3.11183400 |
| H | -1.80161500 | 1.74526300  | -3.99657300 |
| H | -3.41729900 | 1.69583800  | -3.28356400 |
| H | -2.01064200 | 2.01442100  | -2.25637900 |
| C | -2.65759900 | -0.89243300 | -4.09569400 |
| H | -2.49069900 | -1.96499200 | -3.95092000 |
| H | -3.72569100 | -0.74571500 | -4.28898100 |
| H | -2.11132900 | -0.58231500 | -4.99298000 |
| C | 3.39047100  | -0.06768100 | -3.83795300 |
| H | 4.38109700  | 0.39412500  | -3.90693400 |
| H | 3.53275700  | -1.15177800 | -3.77688700 |
| H | 2.85802900  | 0.15274500  | -4.76934700 |
| C | 2.35552800  | 1.98514800  | -2.74514600 |
| H | 1.76069800  | 2.35500500  | -1.90463700 |
| H | 3.29995800  | 2.53967600  | -2.75924600 |
| H | 1.82085000  | 2.21436200  | -3.67354100 |
| H | -6.02326600 | -0.58918200 | -0.23309500 |
| H | 6.21131800  | 0.70252300  | 0.33715100  |

**L<sub>3</sub>-4**

|   |            |            |            |
|---|------------|------------|------------|
| C | 2.01375500 | 0.13318600 | 0.49957000 |
| C | 3.83606800 | 0.97137400 | 1.59304900 |

|    |             |             |             |   |             |             |             |
|----|-------------|-------------|-------------|---|-------------|-------------|-------------|
| C  | 3.73805300  | -0.33997800 | 1.91760200  | B | -2.29837300 | -0.55364100 | -1.13193800 |
| N  | 2.62994600  | -0.83896000 | 1.24270000  | O | -1.60240000 | -1.63519500 | -0.38997300 |
| N  | 2.78357400  | 1.24526200  | 0.72930900  | O | -2.88883600 | -1.20147300 | -2.30269300 |
| C  | 2.95148100  | -3.16223000 | 0.52868300  | C | -2.90807700 | -2.60948700 | -2.10324000 |
| C  | 2.26226700  | -2.23522500 | 1.33837400  | C | -1.66523400 | -2.85008400 | -1.16111800 |
| C  | 1.30840000  | -2.62356500 | 2.29894800  | C | -0.35082200 | -3.00873200 | -1.94574800 |
| C  | 1.06118100  | -3.99508900 | 2.43974500  | H | 0.48182900  | -2.98395400 | -1.23638200 |
| C  | 1.72944800  | -4.93411100 | 1.65981500  | H | -0.30472900 | -3.96083300 | -2.48669900 |
| C  | 2.66015600  | -4.51941800 | 0.71144200  | H | -0.22193300 | -2.19325800 | -2.66115900 |
| H  | 0.33244100  | -4.32876000 | 3.17141700  | C | -1.82405000 | -4.03606900 | -0.20503400 |
| H  | 3.17247600  | -5.26013500 | 0.10517400  | H | -1.97857200 | -4.96921700 | -0.75971200 |
| C  | 3.26259400  | 2.87190600  | -1.04356800 | H | -0.92166200 | -4.15233600 | 0.40158100  |
| C  | 3.09578900  | 4.16400500  | -1.55611600 | H | -2.67085500 | -3.88950500 | 0.46818800  |
| C  | 2.28920000  | 5.09643900  | -0.90969900 | C | -2.81286600 | -3.30162000 | -3.46878500 |
| C  | 1.63610200  | 4.75664100  | 0.27113200  | H | -1.93960600 | -2.96669400 | -4.03253900 |
| C  | 1.76918600  | 3.48060000  | 0.83319900  | H | -2.76285500 | -4.39153500 | -3.36193200 |
| C  | 2.58190100  | 2.55445300  | 0.15010900  | H | -3.70363200 | -3.06271400 | -4.05849200 |
| H  | 3.60464900  | 4.44283200  | -2.47362800 | C | -4.24580600 | -3.00186900 | -1.44388300 |
| H  | 1.01633900  | 5.49475100  | 0.77045700  | H | -4.35510300 | -4.08757800 | -1.34323900 |
| Cu | 0.41617000  | 0.09456600  | -0.53019000 | H | -4.35902800 | -2.53702300 | -0.46298000 |
| H  | 4.34267900  | -0.96411000 | 2.55518400  | H | -5.05972200 | -2.63204100 | -2.07459100 |
| H  | 4.54380700  | 1.72873300  | 1.88835500  | B | -3.40586900 | 0.30264000  | -0.09965400 |
| C  | 0.57582900  | -1.62727500 | 3.19124900  | C | -5.42789100 | 0.89851600  | 0.86143000  |
| H  | 0.81184000  | -0.61985400 | 2.83770700  | O | -4.70309800 | -0.12825000 | 0.14836600  |
| C  | 4.00701200  | -2.74725500 | -0.49408500 | C | -4.26493100 | 1.74285200  | 1.50623900  |
| H  | 4.01750700  | -1.65493600 | -0.54810800 | O | -3.15545400 | 1.48016500  | 0.60880500  |
| C  | 1.09038600  | 3.16216000  | 2.16172300  | C | -6.37625800 | 0.22475000  | 1.85446000  |
| H  | 1.21833300  | 2.09476100  | 2.36147200  | H | -6.91987300 | 0.96633200  | 2.45058500  |
| C  | 4.18376500  | 1.88498600  | -1.75652700 | H | -7.11129300 | -0.37173700 | 1.30606000  |
| H  | 4.05792500  | 0.90523700  | -1.28716600 | H | -5.84305800 | -0.44494700 | 2.53190100  |
| O  | -1.14071500 | 0.40955400  | -1.60635100 | C | -6.24318600 | 1.67597600  | -0.18370300 |
| C  | -1.26229600 | 1.32057100  | -2.72869400 | H | -6.88893100 | 0.97349100  | -0.71783900 |
| C  | -0.35069400 | 2.52067200  | -2.45672400 | H | -6.87325300 | 2.44455000  | 0.27567700  |
| H  | -0.65876000 | 3.03865300  | -1.54399900 | H | -5.59067000 | 2.15300200  | -0.91998200 |
| H  | 0.68964100  | 2.20363000  | -2.33559000 | C | -4.50801000 | 3.25165400  | 1.55655500  |
| H  | -0.39014000 | 3.23186800  | -3.28940300 | H | -5.38036800 | 3.48941600  | 2.17550200  |
| C  | -2.71188400 | 1.81187200  | -2.88026500 | H | -3.63871800 | 3.75183600  | 1.99422200  |
| H  | -2.77356700 | 2.50928000  | -3.72326300 | H | -4.66666300 | 3.66607200  | 0.55923100  |
| H  | -3.38866000 | 0.97689100  | -3.07049100 | C | -3.85149800 | 1.23508500  | 2.89551800  |
| H  | -3.03276400 | 2.33698400  | -1.97663900 | H | -2.92853300 | 1.73800100  | 3.19731500  |
| C  | -0.81856000 | 0.58385800  | -4.00267700 | H | -4.61773400 | 1.44131400  | 3.64987400  |
| H  | -0.87150400 | 1.24329000  | -4.87720200 | H | -3.65945800 | 0.15914900  | 2.87701100  |
| H  | 0.21573200  | 0.23511900  | -3.89938300 | H | 2.17247200  | 6.09291200  | -1.32613700 |
| H  | -1.46510100 | -0.27984300 | -4.16616800 | H | 1.52080800  | -5.99236500 | 1.78802900  |

|   |             |             |             |    |             |             |             |
|---|-------------|-------------|-------------|----|-------------|-------------|-------------|
| C | 1.06432000  | -1.73314000 | 4.65028500  | C  | 3.77042200  | -4.24611600 | -0.98565700 |
| H | 0.85006800  | -2.72258800 | 5.06885300  | C  | 4.04880100  | -3.07703900 | -1.68846300 |
| H | 2.14386600  | -1.56489600 | 4.72991700  | H  | 2.93452800  | -5.09955800 | 0.79711400  |
| H | 0.55843900  | -0.99012500 | 5.27615700  | H  | 4.54155000  | -3.13823200 | -2.65403800 |
| C | -0.95312700 | -1.78887700 | 3.09619500  | C  | 1.77692900  | 3.73252100  | 0.39623400  |
| H | -1.44418600 | -1.00094400 | 3.67744200  | C  | 1.12283200  | 4.96820300  | 0.48473000  |
| H | -1.29300700 | -1.72318000 | 2.05838800  | C  | 0.06125600  | 5.15654600  | 1.36361000  |
| H | -1.28223600 | -2.74984400 | 3.50756900  | C  | -0.37187100 | 4.10901100  | 2.17270700  |
| C | -0.42399500 | 3.43736800  | 2.13174200  | C  | 0.24196500  | 2.85131400  | 2.12900400  |
| H | -0.86116400 | 3.19021500  | 3.10540200  | C  | 1.31297200  | 2.68946500  | 1.22646200  |
| H | -0.63931000 | 4.49401900  | 1.93862600  | H  | 1.45513800  | 5.79222800  | -0.13938300 |
| H | -0.93610100 | 2.83800100  | 1.37398900  | H  | -1.20216300 | 4.27031500  | 2.85052300  |
| C | 1.77092800  | 3.93194300  | 3.31287300  | Cu | -0.02622600 | -0.18385600 | -0.19936700 |
| H | 2.84126300  | 3.70745200  | 3.37128700  | H  | 4.71115500  | -0.37047500 | 1.73216800  |
| H | 1.66574200  | 5.01455300  | 3.18258200  | H  | 3.71073300  | 2.13700400  | 2.39682000  |
| H | 1.31592800  | 3.66479100  | 4.27256000  | C  | 2.13632700  | -2.91823300 | 2.20416900  |
| C | 5.41368400  | -3.20063900 | -0.05412800 | H  | 1.89607200  | -1.87768800 | 2.43961300  |
| H | 5.67722800  | -2.79929800 | 0.92990300  | C  | 4.08822600  | -0.55909700 | -1.94022100 |
| H | 5.47777700  | -4.29238100 | 0.00520900  | H  | 3.64963200  | 0.29849100  | -1.42333000 |
| H | 6.16801100  | -2.86039100 | -0.77173300 | C  | -0.20305400 | 1.73565300  | 3.07014400  |
| C | 3.68195000  | -3.26352800 | -1.90865800 | H  | 0.00996300  | 0.78114000  | 2.58012400  |
| H | 3.68732600  | -4.35768800 | -1.95261600 | C  | 2.97095600  | 3.58499600  | -0.54654400 |
| H | 2.69896400  | -2.92028400 | -2.24179600 | H  | 3.30021500  | 2.54312300  | -0.52283100 |
| H | 4.43129100  | -2.90277900 | -2.62161700 | O  | -1.01963600 | -2.10951400 | -0.84849000 |
| C | 3.82892400  | 1.71842200  | -3.24582200 | C  | -1.08522200 | -2.86016700 | -2.08073500 |
| H | 2.78957600  | 1.40415800  | -3.37602400 | C  | 0.36827900  | -3.17139900 | -2.45137200 |
| H | 3.97129600  | 2.64861900  | -3.80577400 | H  | 0.92000400  | -2.24511700 | -2.63426300 |
| H | 4.47331100  | 0.95957800  | -3.70222200 | H  | 0.86521500  | -3.70835400 | -1.63928100 |
| C | 5.66136100  | 2.29352700  | -1.58693800 | H  | 0.41836500  | -3.78518700 | -3.35765400 |
| H | 5.85669900  | 3.26974300  | -2.04378200 | C  | -1.75504800 | -2.07348100 | -3.21812200 |
| H | 5.94222900  | 2.35959900  | -0.53077200 | H  | -1.72500000 | -2.66340400 | -4.14207600 |
| H | 6.31960700  | 1.56125700  | -2.06676200 | H  | -2.79717600 | -1.85633500 | -2.97732900 |

### L<sub>3</sub>-TS5

|   |            |             |             |   |             |             |             |
|---|------------|-------------|-------------|---|-------------|-------------|-------------|
| C | 1.71818800 | 0.29852000  | 0.51676200  | H | -1.37285200 | -4.74486800 | -1.03015500 |
| C | 3.29328600 | 1.33576600  | 1.80933800  | H | -2.88092800 | -3.97019700 | -1.57173900 |
| C | 3.78217700 | 0.11632900  | 1.48384800  | B | -2.07814700 | -1.28521900 | -0.21650400 |
| N | 2.81942000 | -0.50006000 | 0.69376100  | O | -2.06847100 | -1.39960700 | 1.23157400  |
| N | 2.04512100 | 1.44023600  | 1.20670000  | O | -3.43326900 | -1.55886800 | -0.64912700 |
| C | 3.71279800 | -1.82166700 | -1.16833100 | C | -4.27306000 | -1.81495800 | 0.49401300  |
| C | 3.07567000 | -1.78974500 | 0.08985100  | C | -3.23790500 | -2.11359000 | 1.65417300  |
| C | 2.78705100 | -2.95380700 | 0.82612300  | C | -2.90124300 | -3.60950900 | 1.79829800  |
| C | 3.14575000 | -4.18240200 | 0.25609200  | H | -2.09225800 | -3.71828600 | 2.52540600  |

|   |             |             |             |                        |             |             |             |
|---|-------------|-------------|-------------|------------------------|-------------|-------------|-------------|
| H | -3.75897300 | -4.18709900 | 2.15995200  | H                      | 1.80745100  | 3.25843000  | -2.36966200 |
| H | -2.56324300 | -4.03984400 | 0.85508700  | C                      | 3.52034200  | -0.55299300 | -3.37161200 |
| C | -3.65751600 | -1.58369200 | 3.03007600  | H                      | 3.78059000  | 0.38455600  | -3.87463600 |
| H | -4.57575400 | -2.06837100 | 3.38108200  | H                      | 3.92426200  | -1.37286300 | -3.97475700 |
| H | -2.86724100 | -1.79970300 | 3.75668100  | H                      | 2.43079100  | -0.64436300 | -3.36686000 |
| H | -3.81547900 | -0.50490700 | 3.01436700  | C                      | 5.61755200  | -0.35936900 | -1.95382400 |
| C | -5.20086400 | -2.98601100 | 0.14648800  | H                      | 6.02536700  | -0.31031300 | -0.93894600 |
| H | -4.64614500 | -3.88374400 | -0.13021500 | H                      | 6.12035800  | -1.18159900 | -2.47423400 |
| H | -5.85670600 | -3.23161800 | 0.98961600  | H                      | 5.87868100  | 0.57148700  | -2.46898300 |
| H | -5.83427700 | -2.70700300 | -0.70140900 | C                      | 0.81122500  | -3.69975000 | 2.22064400  |
| C | -5.13970100 | -0.57691900 | 0.76981100  | H                      | 0.34713400  | -3.62458300 | 3.20994400  |
| H | -5.82194300 | -0.74487200 | 1.60968800  | H                      | 0.11123300  | -3.29823500 | 1.48455200  |
| H | -4.52299700 | 0.29824600  | 0.97677800  | H                      | 0.96856300  | -4.76366900 | 2.00993500  |
| H | -5.74473800 | -0.36405500 | -0.11592700 | C                      | 3.10541400  | -3.42599400 | 3.29047400  |
| B | -1.97541100 | 0.60007400  | -0.81615300 | H                      | 3.37387900  | -4.47556700 | 3.12819700  |
| C | -2.32571500 | 2.25009100  | -2.42368100 | H                      | 4.03396400  | -2.84503400 | 3.30896800  |
| O | -1.79871300 | 0.92520500  | -2.15815500 | H                      | 2.63998500  | -3.35131600 | 4.27899700  |
| C | -3.26056400 | 2.50274800  | -1.17785100 | C                      | -1.71273700 | 1.75308300  | 3.35428000  |
| O | -2.71857300 | 1.58843100  | -0.18126900 | H                      | -2.00911800 | 2.62153500  | 3.95416800  |
| C | -3.03547500 | 2.21811300  | -3.77872000 | H                      | -2.28465400 | 1.74994800  | 2.42316400  |
| H | -3.49203900 | 3.18719300  | -4.00824500 | H                      | -1.98431800 | 0.85943800  | 3.92224300  |
| H | -2.30739400 | 1.99412800  | -4.56411300 | C                      | 0.60241700  | 1.78710000  | 4.38615500  |
| H | -3.80909300 | 1.44963100  | -3.81097300 | H                      | 0.30230300  | 0.96663300  | 5.04675000  |
| C | -1.12663800 | 3.20273700  | -2.49652800 | H                      | 1.67972900  | 1.70021200  | 4.21195200  |
| H | -0.44493200 | 2.84922900  | -3.27584900 | H                      | 0.42349300  | 2.72956400  | 4.91650500  |
| H | -1.43321500 | 4.22326900  | -2.74797200 |                        |             |             |             |
| H | -0.58137200 | 3.22614600  | -1.55084200 | <b>L<sub>3</sub>-6</b> |             |             |             |
| C | -3.21121900 | 3.91932900  | -0.60498800 | C                      | -1.28821800 | 0.05300000  | -0.03446100 |
| H | -3.56869100 | 4.65067800  | -1.33846200 | C                      | -3.42830400 | 0.83449000  | -0.17209400 |
| H | -3.86286100 | 3.97817900  | 0.27216400  | C                      | -3.49486200 | -0.52047600 | -0.14392800 |
| H | -2.20369000 | 4.19707800  | -0.29324300 | N                      | -2.18406900 | -0.97916400 | -0.05989900 |
| C | -4.71986800 | 2.10484000  | -1.43357100 | N                      | -2.07893000 | 1.16577600  | -0.10443900 |
| H | -5.28208500 | 2.17638300  | -0.49926000 | C                      | -1.74155200 | -2.99815600 | 1.26426600  |
| H | -5.18980000 | 2.76923000  | -2.16571200 | C                      | -1.82248900 | -2.37720300 | 0.00200700  |
| H | -4.79222800 | 1.07581100  | -1.79142800 | C                      | -1.57324500 | -3.06643900 | -1.20115500 |
| H | 4.04232600  | -5.20962400 | -1.40731500 | C                      | -1.23796500 | -4.42304300 | -1.11047000 |
| H | -0.43072300 | 6.12351200  | 1.42079700  | C                      | -1.15254800 | -5.06319200 | 0.12225400  |
| C | 4.15665300  | 4.45170200  | -0.07538100 | C                      | -1.40055000 | -4.35581700 | 1.29501300  |
| H | 3.90376500  | 5.51707600  | -0.09848500 | H                      | -1.03447700 | -4.98181700 | -2.01892800 |
| H | 4.45561900  | 4.20595500  | 0.94866700  | H                      | -1.32120900 | -4.86263000 | 2.25184900  |
| H | 5.02437600  | 4.30045900  | -0.72645800 | C                      | -1.41007500 | 3.17797100  | 1.13321400  |
| C | 2.61025200  | 3.90558900  | -2.00877600 | C                      | -0.93275200 | 4.49400800  | 1.10550400  |
| H | 2.28561800  | 4.94440100  | -2.13015500 | C                      | -0.63981900 | 5.12872200  | -0.09803900 |
| H | 3.48435200  | 3.75724800  | -2.65229800 |                        |             |             |             |

|    |             |             |             |                        |             |             |             |
|----|-------------|-------------|-------------|------------------------|-------------|-------------|-------------|
| C  | -0.81717900 | 4.45611700  | -1.30366400 | H                      | -4.03416800 | -2.95360800 | 2.85276000  |
| C  | -1.29104700 | 3.13896600  | -1.33578600 | H                      | -2.83002300 | -3.90552100 | 3.73083100  |
| C  | -1.58122200 | 2.52291700  | -0.10238100 | H                      | -3.27705200 | -2.30089000 | 4.31661400  |
| H  | -0.78295300 | 5.02487600  | 2.04076900  | C                      | -0.39168300 | 2.28249900  | 3.26516500  |
| H  | -0.57690400 | 4.95737400  | -2.23644100 | H                      | -0.60116700 | 1.75429700  | 4.20193200  |
| Cu | 0.67693700  | -0.03830800 | 0.04170900  | H                      | 0.32608700  | 1.69021400  | 2.68954400  |
| H  | -4.33728600 | -1.19283400 | -0.17417700 | H                      | 0.08490400  | 3.23577300  | 3.51850600  |
| H  | -4.20089800 | 1.58428800  | -0.23173300 | C                      | -2.73145100 | 3.28503900  | 3.30024800  |
| C  | -1.63398900 | -2.39165200 | -2.56760900 | H                      | -2.36387400 | 4.27921800  | 3.57540800  |
| H  | -1.94565300 | -1.35389000 | -2.41968100 | H                      | -3.66861300 | 3.41750300  | 2.74949900  |
| C  | -1.97704700 | -2.24701100 | 2.57104100  | H                      | -2.95623700 | 2.74935100  | 4.22875200  |
| H  | -2.30285000 | -1.23230400 | 2.32548500  | C                      | -2.40924200 | 3.17070600  | -3.61556800 |
| C  | -1.44748600 | 2.42212900  | -2.67309600 | H                      | -3.39440200 | 3.30771900  | -3.15745900 |
| H  | -1.88392200 | 1.43788500  | -2.48149100 | H                      | -2.02589300 | 4.16135800  | -3.88189200 |
| C  | -1.69463500 | 2.50304700  | 2.47147400  | H                      | -2.54268200 | 2.60855400  | -4.54599000 |
| H  | -2.12107500 | 1.51655300  | 2.26907200  | C                      | -0.07670100 | 2.18911800  | -3.33874700 |
| B  | 2.66944700  | -0.11905100 | 0.08455000  | H                      | 0.41615200  | 3.13801300  | -3.57743300 |
| C  | 4.85052300  | -0.60915400 | -0.55166800 | H                      | 0.58814600  | 1.61859800  | -2.68287800 |
| O  | 3.48309300  | -0.44420300 | -1.00451400 | H                      | -0.19802100 | 1.63161700  | -4.27406500 |
| C  | 4.85944500  | 0.21300800  | 0.78762400  | C                      | -0.24284600 | -2.35703200 | -3.23085700 |
| O  | 3.47034100  | 0.14722000  | 1.19814900  | H                      | 0.48687700  | -1.84985200 | -2.59249000 |
| C  | 5.79018200  | -0.09589600 | -1.64344400 | H                      | 0.12885600  | -3.36794900 | -3.43087200 |
| H  | 6.83771900  | -0.15660000 | -1.32647500 | H                      | -0.29144900 | -1.82478100 | -4.18727800 |
| H  | 5.67422100  | -0.70869700 | -2.54271700 | C                      | -2.67779300 | -3.05579300 | -3.48599300 |
| H  | 5.56664500  | 0.93798600  | -1.91289400 | H                      | -2.41646300 | -4.09582500 | -3.70843700 |
| C  | 5.07322000  | -2.11523700 | -0.34160600 | H                      | -3.67330200 | -3.05362200 | -3.02974500 |
| H  | 4.84819600  | -2.63833100 | -1.27561000 | H                      | -2.74006900 | -2.52045600 | -4.43947200 |
| H  | 6.10686200  | -2.34238900 | -0.05960900 |                        |             |             |             |
| H  | 4.40552300  | -2.50525300 | 0.43135900  | <b>L<sub>3</sub>-7</b> |             |             |             |
| C  | 5.72588100  | -0.36539600 | 1.90706000  | C                      | 1.67274200  | 1.16902300  | 0.22464700  |
| H  | 6.78373500  | -0.38487100 | 1.62069600  | C                      | 2.51926500  | 3.19961400  | 0.82870900  |
| H  | 5.63028800  | 0.25750700  | 2.80173500  | C                      | 3.49900000  | 2.28087400  | 1.02184500  |
| H  | 5.41763000  | -1.37865900 | 2.17120600  | N                      | 2.96604000  | 1.05039100  | 0.65358000  |
| C  | 5.19571900  | 1.69904700  | 0.58628600  | N                      | 1.41519900  | 2.50623600  | 0.34537000  |
| H  | 4.97944000  | 2.23786300  | 1.51337100  | C                      | 4.33956300  | -0.68696300 | -0.41794500 |
| H  | 6.25127600  | 1.85181000  | 0.33715500  | C                      | 3.69454000  | -0.19598900 | 0.73550100  |
| H  | 4.58202200  | 2.13503500  | -0.20654300 | C                      | 3.74937600  | -0.85976100 | 1.97800300  |
| H  | -0.88709000 | -6.11554900 | 0.16957500  | C                      | 4.48879300  | -2.04704700 | 2.04441100  |
| H  | -0.26806900 | 6.14948100  | -0.09624100 | C                      | 5.13868000  | -2.55370900 | 0.92297400  |
| C  | -0.66923200 | -2.12248600 | 3.37781700  | C                      | 5.06132700  | -1.88032800 | -0.29257500 |
| H  | -0.28867300 | -3.10679100 | 3.67186000  | H                      | 4.55192900  | -2.58217600 | 2.98712000  |
| H  | 0.10857200  | -1.62126000 | 2.79369800  | H                      | 5.56972800  | -2.28589100 | -1.16152700 |
| H  | -0.83947700 | -1.54317400 | 4.29203600  | C                      | -0.06855800 | 3.55362700  | -1.30803600 |
| C  | -3.09505400 | -2.89172400 | 3.41256200  |                        |             |             |             |

|    |             |             |             |   |             |             |             |
|----|-------------|-------------|-------------|---|-------------|-------------|-------------|
| C  | -1.30233600 | 4.15067000  | -1.59572600 | C | 0.12325700  | -4.55895600 | -3.75456100 |
| C  | -2.27047800 | 4.31425300  | -0.61031700 | H | -0.56446600 | -5.20620300 | -4.31054000 |
| C  | -2.02086300 | 3.89269900  | 0.69263000  | H | 1.00911600  | -4.39581900 | -4.37589400 |
| C  | -0.80572200 | 3.29099100  | 1.03909600  | H | 0.43971700  | -5.08147500 | -2.85036100 |
| C  | 0.15177700  | 3.12788500  | 0.01638600  | C | -0.77163200 | -2.42706800 | -4.72504800 |
| H  | -1.50761500 | 4.48458200  | -2.60836900 | H | -1.23599100 | -1.45977400 | -4.51514500 |
| H  | -2.78764500 | 4.02034100  | 1.44923500  | H | 0.19043000  | -2.24064800 | -5.21100000 |
| Cu | 0.58344400  | -0.23698700 | -0.62116800 | H | -1.40929200 | -2.97734000 | -5.42479100 |
| H  | 4.50941900  | 2.38292300  | 1.38381700  | C | -4.35482800 | 0.29739600  | 0.18657000  |
| H  | 2.50413800  | 4.26628000  | 0.98463700  | C | -5.20444800 | 1.13496600  | 0.93116400  |
| C  | 3.05350400  | -0.33149400 | 3.22963300  | C | -4.21198000 | 0.51556700  | -1.19376100 |
| H  | 2.46073700  | 0.54231600  | 2.94569300  | C | -5.89776900 | 2.16484800  | 0.30397400  |
| C  | 4.30903000  | 0.04255200  | -1.75773100 | H | -5.30876000 | 0.94912400  | 1.99513300  |
| H  | 3.56630800  | 0.84184100  | -1.68983800 | C | -4.90646100 | 1.55205400  | -1.81826500 |
| C  | -0.53937300 | 2.87663900  | 2.48378900  | H | -3.54770800 | -0.13053000 | -1.76155200 |
| H  | 0.32569500  | 2.20689300  | 2.48633700  | C | -5.75192100 | 2.37616300  | -1.07299900 |
| C  | 0.96928500  | 3.39281100  | -2.41461800 | H | -6.56036800 | 2.80299300  | 0.88273500  |
| H  | 1.85350500  | 2.91443900  | -1.98423100 | H | -4.79079100 | 1.71407300  | -2.88635400 |
| C  | -3.62298700 | -0.81516100 | 0.80833000  | H | -6.30085100 | 3.17735200  | -1.56086500 |
| N  | -3.66432000 | -1.02937500 | 2.07490700  | H | -3.05259200 | -1.44515300 | 0.11511700  |
| C  | -2.93394600 | -2.09479500 | 2.63750200  | C | 2.07768300  | -1.36269900 | 3.82603500  |
| C  | -3.42669000 | -2.63276600 | 3.83843800  | H | 2.59988600  | -2.26031000 | 4.17416000  |
| C  | -1.74229500 | -2.61797700 | 2.09766900  | H | 1.55447000  | -0.93287800 | 4.68676100  |
| C  | -2.77416900 | -3.69152400 | 4.46607700  | H | 1.32548900  | -1.67160700 | 3.09533400  |
| H  | -4.33479200 | -2.20658300 | 4.25364300  | C | 4.08080400  | 0.13096700  | 4.28244300  |
| C  | -1.08902600 | -3.67051800 | 2.73805800  | H | 4.70694700  | -0.70226800 | 4.61941800  |
| H  | -1.32285600 | -2.19761100 | 1.18824500  | H | 4.74561800  | 0.90445600  | 3.88378000  |
| C  | -1.60103300 | -4.21651800 | 3.91863000  | H | 3.57092500  | 0.54175200  | 5.16046500  |
| H  | -3.17751000 | -4.10273900 | 5.38756600  | C | -1.71070900 | 2.10252700  | 3.11405000  |
| H  | -0.17014700 | -4.06417400 | 2.31125500  | H | -2.59535100 | 2.73496000  | 3.24405200  |
| H  | -1.08512400 | -5.03585300 | 4.41122100  | H | -2.00392700 | 1.23935300  | 2.51203400  |
| B  | -0.30563000 | -1.66834700 | -1.69773100 | H | -1.42429600 | 1.74090900  | 4.10731900  |
| C  | -1.78702300 | -3.28640400 | -2.49532500 | C | -0.17848200 | 4.10814000  | 3.34096100  |
| O  | -1.65045600 | -2.07113300 | -1.70524700 | H | 0.69588000  | 4.63535000  | 2.94552100  |
| C  | -0.52639500 | -3.21411600 | -3.42843900 | H | -1.01091200 | 4.81982900  | 3.37009800  |
| O  | 0.40040000  | -2.43345500 | -2.62946100 | H | 0.04429900  | 3.80816800  | 4.37070500  |
| C  | -1.74949200 | -4.46715300 | -1.51365500 | C | 3.87590900  | -0.87490300 | -2.91691400 |
| H  | -2.53416700 | -4.33529100 | -0.76353500 | H | 3.80591500  | -0.29188100 | -3.84200700 |
| H  | -1.91623500 | -5.42313000 | -2.02078700 | H | 4.60332800  | -1.67504800 | -3.09321000 |
| H  | -0.79143500 | -4.51330100 | -0.98916400 | H | 2.90089400  | -1.33338800 | -2.72865400 |
| C  | -3.13563800 | -3.25381600 | -3.21370100 | C | 5.67356300  | 0.70071500  | -2.04840300 |
| H  | -3.24973400 | -2.35267400 | -3.81934000 | H | 5.96057800  | 1.39948800  | -1.25535400 |
| H  | -3.25578500 | -4.12733700 | -3.86432300 | H | 6.46605800  | -0.05123300 | -2.13161200 |
| H  | -3.94562200 | -3.27020500 | -2.47814500 | H | 5.63818900  | 1.25538000  | -2.99238200 |

|   |             |             |             |   |             |             |             |
|---|-------------|-------------|-------------|---|-------------|-------------|-------------|
| C | 1.41511900  | 4.75980000  | -2.97005000 | H | 1.64410600  | -1.31033500 | -2.40607500 |
| H | 0.58368400  | 5.29244800  | -3.44400000 | C | -0.00173500 | 2.45360200  | 0.44342400  |
| H | 1.81335500  | 5.40344800  | -2.17866300 | N | 0.37091700  | 1.85859900  | 1.66097200  |
| H | 2.19726900  | 4.62779600  | -3.72546200 | C | -0.46227800 | 1.93895500  | 2.76836800  |
| C | 0.45822300  | 2.47190300  | -3.53915000 | C | 0.00024600  | 1.34597600  | 3.97276500  |
| H | 0.18780000  | 1.48700000  | -3.14604500 | C | -1.70957100 | 2.61115500  | 2.83778500  |
| H | -0.42270200 | 2.89516500  | -4.03401700 | C | -0.71197600 | 1.44331600  | 5.16115600  |
| H | 1.23409500  | 2.33570200  | -4.30071300 | H | 0.95154400  | 0.82481300  | 3.94472000  |
| H | -3.22722100 | 4.76391100  | -0.85796200 | C | -2.41756000 | 2.70259500  | 4.03673800  |
| H | 5.70568400  | -3.47754400 | 0.99578900  | H | -2.14211100 | 3.05159300  | 1.94708700  |

### L<sub>3</sub>-TS8

|    |             |             |             |   |             |             |             |
|----|-------------|-------------|-------------|---|-------------|-------------|-------------|
| C  | 0.60796800  | -1.43287600 | 0.01981300  | H | -2.48870300 | 2.20862600  | 6.14199300  |
| C  | 1.93761600  | -3.28943200 | -0.02689900 | B | -1.37059800 | 1.63564300  | -0.75326100 |
| C  | 0.65714400  | -3.71497700 | 0.06962700  | C | -3.65205200 | 1.73632700  | -1.13326400 |
| N  | -0.14535700 | -2.57677700 | 0.08732500  | O | -2.60687500 | 1.51489900  | -0.14350900 |
| N  | 1.89701300  | -1.89905000 | -0.05503200 | C | -2.87072600 | 2.45916100  | -2.30224300 |
| C  | -2.14530100 | -3.03545600 | -1.23823200 | O | -1.48642700 | 2.05654100  | -2.06181700 |
| C  | -1.58588200 | -2.68112700 | 0.00765700  | C | -4.21041700 | 0.36356500  | -1.51751900 |
| C  | -2.36103300 | -2.52378000 | 1.17465800  | H | -4.57814800 | -0.13387900 | -0.61725000 |
| C  | -3.73913800 | -2.74835100 | 1.06162300  | H | -5.03856000 | 0.44957000  | -2.22846900 |
| C  | -4.31679400 | -3.11732700 | -0.15051700 | H | -3.43949900 | -0.27416500 | -1.95222800 |
| C  | -3.52797900 | -3.25299900 | -1.28836900 | C | -4.75337000 | 2.56959900  | -0.47525700 |
| H  | -4.36738400 | -2.63756600 | 1.93829000  | H | -4.37094100 | 3.50858500  | -0.07154200 |
| H  | -3.98974400 | -3.53033900 | -2.23134000 | H | -5.55230300 | 2.79594600  | -1.18983800 |
| C  | 3.47821100  | -0.69597800 | -1.50108200 | H | -5.18940700 | 2.00262800  | 0.35178000  |
| C  | 4.71432200  | -0.05331000 | -1.63747400 | C | -3.25544700 | 2.01710900  | -3.71327600 |
| C  | 5.54012800  | 0.16374300  | -0.53905500 | H | -4.30093800 | 2.26258600  | -3.92864000 |
| C  | 5.13578200  | -0.24245600 | 0.72885700  | H | -2.62856000 | 2.53814400  | -4.44270300 |
| C  | 3.90805000  | -0.88660700 | 0.92711400  | H | -3.11410100 | 0.94439500  | -3.85340700 |
| C  | 3.10239500  | -1.11363500 | -0.20721100 | C | -2.91315100 | 3.99078700  | -2.21314500 |
| H  | 5.03393200  | 0.27755800  | -2.62043700 | H | -2.59449900 | 4.34811400  | -1.22990400 |
| H  | 5.78279800  | -0.05932300 | 1.58083600  | H | -2.23691900 | 4.41258600  | -2.96214900 |
| Cu | 0.10413900  | 0.40344800  | 0.17943500  | H | -3.91852400 | 4.37649700  | -2.40792900 |
| H  | 0.23620700  | -4.70613800 | 0.11461500  | C | 1.17456800  | 3.01570700  | -0.34183100 |
| H  | 2.86721400  | -3.83209100 | -0.07924100 | C | 2.48617000  | 2.81608200  | 0.11394600  |
| C  | -1.73826100 | -2.18203200 | 2.52580700  | C | 0.98247200  | 3.81854200  | -1.47860400 |
| H  | -0.82520300 | -1.60868500 | 2.33859800  | C | 3.57097500  | 3.38509600  | -0.55592700 |
| C  | -1.31424300 | -3.18827000 | -2.51158800 | H | 2.62978600  | 2.23203100  | 1.01427300  |
| H  | -0.26241700 | -3.03998000 | -2.25592400 | C | 2.06561600  | 4.39087600  | -2.14373800 |
| C  | 3.50469000  | -1.33056500 | 2.32990700  | H | -0.02067800 | 3.99117300  | -1.84789800 |
| H  | 2.45519200  | -1.63716300 | 2.29842900  | C | 3.36846500  | 4.17365100  | -1.68828100 |
| C  | 2.62100700  | -0.94926200 | -2.73770200 | H | 4.57677000  | 3.21609600  | -0.18170400 |

|                        |             |             |             |    |             |             |             |
|------------------------|-------------|-------------|-------------|----|-------------|-------------|-------------|
| H                      | 1.89020300  | 5.01471100  | -3.01647400 | N  | 2.93835700  | -0.73578800 | -0.43693800 |
| H                      | 4.21213500  | 4.62410300  | -2.20446900 | C  | -0.52972100 | -2.40150600 | -2.51412000 |
| H                      | -0.80139500 | 3.20815700  | 0.49191300  | C  | 0.14462900  | -2.75931300 | -1.32887900 |
| C                      | -2.64185500 | -1.30220500 | 3.40431400  | C  | -0.34282400 | -3.73824200 | -0.43927900 |
| H                      | -3.52813100 | -1.84411400 | 3.75409100  | C  | -1.55155100 | -4.36284300 | -0.77045900 |
| H                      | -2.08804600 | -0.97133800 | 4.28584700  | C  | -2.24002500 | -4.03047600 | -1.93367200 |
| H                      | -2.96665100 | -0.40407300 | 2.87285800  | C  | -1.73265300 | -3.06110500 | -2.79427700 |
| C                      | -1.33911900 | -3.47108200 | 3.27627000  | H  | -1.95690600 | -5.12140400 | -0.10877800 |
| H                      | -2.22047700 | -4.08867500 | 3.48366300  | H  | -2.27672200 | -2.81282100 | -3.70012000 |
| H                      | -0.63200400 | -4.07787300 | 2.70141800  | C  | 3.95254700  | 1.45501100  | -0.85905100 |
| H                      | -0.86909600 | -3.22218100 | 4.23358100  | C  | 4.65328600  | 2.56407000  | -0.36999600 |
| C                      | 3.60668100  | -0.17794700 | 3.34562200  | C  | 5.01557900  | 2.65233200  | 0.97061100  |
| H                      | 4.64168500  | 0.15140900  | 3.48722700  | C  | 4.69088200  | 1.62512400  | 1.85195300  |
| H                      | 3.01284000  | 0.68075900  | 3.02292100  | C  | 3.99427600  | 0.48989700  | 1.41955900  |
| H                      | 3.23301600  | -0.50495600 | 4.32184000  | C  | 3.62942900  | 0.43483100  | 0.05902700  |
| C                      | 4.33658900  | -2.54433800 | 2.79168000  | H  | 4.91663000  | 3.36809000  | -1.04973100 |
| H                      | 4.22950200  | -3.39416700 | 2.10967400  | H  | 4.98720100  | 1.70159300  | 2.89298300  |
| H                      | 5.40196100  | -2.29451300 | 2.84573300  | Cu | 0.24184600  | 0.10125600  | 0.46415100  |
| H                      | 4.01806800  | -2.87024600 | 3.78769700  | H  | 2.69790500  | -3.60803100 | -1.97332500 |
| C                      | -1.67276700 | -2.11218400 | -3.55498600 | H  | 4.66333800  | -1.81144900 | -1.17679200 |
| H                      | -1.05859600 | -2.23677500 | -4.45367900 | C  | 0.41563800  | -4.16229500 | 0.81538200  |
| H                      | -2.72310800 | -2.18083600 | -3.85894300 | H  | 1.19334100  | -3.41674700 | 1.00642100  |
| H                      | -1.49422200 | -1.10736400 | -3.16051700 | C  | 0.02058700  | -1.37150300 | -3.49601200 |
| C                      | -1.43939800 | -4.60382900 | -3.10724900 | H  | 0.86264800  | -0.86534600 | -3.01675800 |
| H                      | -1.14968600 | -5.37093600 | -2.38157700 | C  | 3.71858400  | -0.65227100 | 2.39334100  |
| H                      | -2.46445900 | -4.82007500 | -3.42600200 | H  | 2.97195000  | -1.31019800 | 1.93953000  |
| H                      | -0.79185100 | -4.70580400 | -3.98459000 | C  | 3.61195800  | 1.36712800  | -2.34477500 |
| C                      | 3.24591700  | -2.04503000 | -3.62507100 | H  | 2.92935000  | 0.52456600  | -2.48677800 |
| H                      | 4.22942000  | -1.73934900 | -3.99862400 | C  | -1.78619900 | 2.16330100  | 1.00241200  |
| H                      | 3.37561700  | -2.98315800 | -3.07517700 | N  | -1.07529600 | 0.96543100  | 1.51022700  |
| H                      | 2.60727900  | -2.24593800 | -4.49221000 | C  | -1.44641300 | 0.45317200  | 2.73884700  |
| C                      | 2.36852600  | 0.33988800  | -3.54180400 | C  | -0.65620200 | -0.57455300 | 3.32994400  |
| H                      | 1.92677500  | 1.12080000  | -2.91741600 | C  | -2.57168700 | 0.87614200  | 3.49989800  |
| H                      | 3.29252200  | 0.73737500  | -3.97500400 | C  | -0.95054100 | -1.11686300 | 4.57413200  |
| H                      | 1.68128500  | 0.13384100  | -4.36955000 | H  | 0.21859700  | -0.92407500 | 2.78508100  |
| H                      | 6.49954000  | 0.65620000  | -0.67078400 | C  | -2.84993300 | 0.32711100  | 4.75207100  |
| H                      | -5.38712200 | -3.29503400 | -0.20806000 | H  | -3.25969000 | 1.60719600  | 3.09606800  |
| <b>L<sub>3</sub>-9</b> |             |             |             | C  | -2.05250100 | -0.67037700 | 5.31314500  |
| C                      | 1.58299300  | -0.92902000 | -0.41257600 | H  | -0.30325500 | -1.89316500 | 4.97784800  |
| C                      | 3.59154300  | -1.78953800 | -1.06510200 | H  | -3.72333400 | 0.68697200  | 5.29270800  |
| C                      | 2.63274000  | -2.66657500 | -1.45258500 | H  | -2.28050900 | -1.09010900 | 6.28820600  |
| N                      | 1.41640100  | -2.13069700 | -1.04694600 | B  | -3.07204700 | 1.66665900  | 0.21956300  |
|                        |             |             |             | C  | -5.19076200 | 0.82274100  | 0.02244800  |
|                        |             |             |             | O  | -4.30902800 | 1.65056400  | 0.82504300  |



|   |             |             |             |                         |             |             |             |
|---|-------------|-------------|-------------|-------------------------|-------------|-------------|-------------|
| C | -4.51326900 | 0.90839100  | -1.39624000 | H                       | 5.78718700  | -0.87962800 | 3.07346200  |
| O | -3.11374800 | 1.13645100  | -1.05689700 | H                       | 4.79399100  | -2.33112900 | 3.28307400  |
| C | -5.15081400 | -0.58632000 | 0.63033300  | C                       | -1.01087700 | -0.28375300 | -3.84716700 |
| H | -5.42738600 | -0.52316500 | 1.68579000  | H                       | -0.54136200 | 0.48676900  | -4.46843800 |
| H | -5.84784200 | -1.26385300 | 0.12715800  | H                       | -1.85007900 | -0.69453500 | -4.41987000 |
| H | -4.14544200 | -1.01259200 | 0.57701200  | H                       | -1.41346300 | 0.19462200  | -2.95029000 |
| C | -6.60450200 | 1.39530500  | 0.10819000  | C                       | 0.55665900  | -2.05928800 | -4.76828300 |
| H | -6.63423700 | 2.44786400  | -0.18008800 | H                       | 1.33496900  | -2.79274000 | -4.53292400 |
| H | -7.29350500 | 0.83612800  | -0.53400400 | H                       | -0.24403700 | -2.58362700 | -5.30137200 |
| H | -6.96592000 | 1.31876400  | 1.13760300  | H                       | 0.98479900  | -1.31860200 | -5.45231300 |
| C | -4.62088600 | -0.36150700 | -2.23712700 | C                       | 4.87746800  | 1.08067200  | -3.17938300 |
| H | -5.67098100 | -0.61011100 | -2.42617300 | H                       | 5.60373900  | 1.89555200  | -3.08732700 |
| H | -4.13246200 | -0.20857700 | -3.20361400 | H                       | 5.37326300  | 0.15788300  | -2.86083200 |
| H | -4.14150600 | -1.21037100 | -1.74735900 | H                       | 4.62175900  | 0.97852600  | -4.23956600 |
| C | -4.97328500 | 2.12229800  | -2.21505700 | C                       | 2.88799800  | 2.62221000  | -2.86333300 |
| H | -4.91236700 | 3.04258000  | -1.62755700 | H                       | 1.98633800  | 2.83680300  | -2.28523700 |
| H | -4.32063300 | 2.23065200  | -3.08609600 | H                       | 3.52999400  | 3.50871400  | -2.82153300 |
| H | -6.00165400 | 2.00469200  | -2.57027000 | H                       | 2.60072000  | 2.47898000  | -3.91086300 |
| C | -0.84123300 | 3.12319900  | 0.28445100  | H                       | 5.55784800  | 3.52254900  | 1.32965700  |
| C | 0.32946000  | 3.54070500  | 0.94109000  | H                       | -3.17452200 | -4.53093400 | -2.17148300 |
| C | -1.13733300 | 3.69396000  | -0.95998900 |                         |             |             |             |
| C | 1.16234800  | 4.50902900  | 0.38444900  | <b>L<sub>3</sub>-10</b> |             |             |             |
| H | 0.57103800  | 3.09890700  | 1.90335400  | C                       | -2.20354400 | 0.52088900  | -0.39863800 |
| C | -0.30468800 | 4.66794500  | -1.52219000 | C                       | -4.37851700 | 0.72498300  | -1.04548200 |
| H | -2.02412900 | 3.37426900  | -1.49709700 | C                       | -3.78450400 | 1.92880000  | -1.24190600 |
| C | 0.84403600  | 5.08402000  | -0.85046400 | N                       | -2.45976900 | 1.78871100  | -0.84333800 |
| H | 2.05713200  | 4.82129300  | 0.91643100  | N                       | -3.40280400 | -0.12246700 | -0.53111200 |
| H | -0.55915800 | 5.10144600  | -2.48619400 | C                       | -0.71004900 | 2.99733200  | -2.07132300 |
| H | 1.48676600  | 5.84618000  | -1.28313600 | C                       | -1.48013300 | 2.85007100  | -0.89971500 |
| H | -2.15444200 | 2.73797300  | 1.86754500  | C                       | -1.34152700 | 3.70305200  | 0.21392800  |
| C | -0.47987900 | -4.21073400 | 2.06634900  | C                       | -0.39980400 | 4.73540400  | 0.12238600  |
| H | -1.26041900 | -4.97414000 | 1.98117100  | C                       | 0.36950000  | 4.90953500  | -1.02431000 |
| H | 0.12459200  | -4.46436900 | 2.94382400  | C                       | 0.21530100  | 4.04774400  | -2.10659500 |
| H | -0.95961800 | -3.24740200 | 2.25779000  | H                       | -0.26594400 | 5.40757800  | 0.96420000  |
| C | 1.11631800  | -5.51876500 | 0.59052500  | H                       | 0.82484500  | 4.18852000  | -2.99399300 |
| H | 0.38486400  | -6.30997500 | 0.39247700  | C                       | -3.44377200 | -2.50010000 | -1.14912200 |
| H | 1.80521800  | -5.48363600 | -0.25994600 | C                       | -3.70685600 | -3.82476800 | -0.77827500 |
| H | 1.68996500  | -5.80607000 | 1.47823900  | C                       | -4.13846100 | -4.14164900 | 0.50644900  |
| C | 3.13764500  | -0.16992700 | 3.73447400  | C                       | -4.31651400 | -3.13591300 | 1.45185300  |
| H | 3.85041500  | 0.44757700  | 4.29131300  | C                       | -4.07463800 | -1.79345700 | 1.13599600  |
| H | 2.22039200  | 0.40692800  | 3.59117300  | C                       | -3.64087300 | -1.50257400 | -0.17311700 |
| H | 2.89383000  | -1.03099500 | 4.36517400  | H                       | -3.56481600 | -4.61847300 | -1.50519700 |
| C | 4.99780400  | -1.48636900 | 2.61617100  | H                       | -4.64347300 | -3.39585500 | 2.45398900  |
| H | 5.38871600  | -1.88544000 | 1.67430300  |                         |             |             |             |

|    |             |             |             |   |             |             |             |
|----|-------------|-------------|-------------|---|-------------|-------------|-------------|
| Cu | -0.55222300 | -0.15737400 | 0.21102100  | H | 7.34739100  | -0.31248800 | -2.08750600 |
| H  | -4.17150700 | 2.86037200  | -1.62208800 | C | 2.62062400  | 0.81100300  | 2.11961300  |
| H  | -5.38971600 | 0.39347800  | -1.21811800 | C | 3.57713600  | 1.83544400  | 2.20747300  |
| C  | -2.16494900 | 3.54254300  | 1.48828900  | C | 2.00857600  | 0.37784200  | 3.30228400  |
| H  | -2.80007600 | 2.65977900  | 1.37351100  | C | 3.91200600  | 2.40586100  | 3.43453100  |
| C  | -0.85060800 | 2.07182700  | -3.27592800 | H | 4.07215600  | 2.18265900  | 1.30445600  |
| H  | -1.58392900 | 1.29995800  | -3.02707900 | C | 2.34538500  | 0.94513900  | 4.53477000  |
| C  | -4.26410900 | -0.71887200 | 2.20197100  | H | 1.26777200  | -0.41191200 | 3.24738400  |
| H  | -4.08325700 | 0.25508500  | 1.73850300  | C | 3.29700200  | 1.96191300  | 4.60826300  |
| C  | -2.96246600 | -2.19152200 | -2.56381400 | H | 4.65659500  | 3.19715800  | 3.47534200  |
| H  | -2.74437600 | -1.12154400 | -2.62145700 | H | 1.86125100  | 0.58657100  | 5.43993300  |
| C  | 2.21978600  | 0.24626400  | 0.75119900  | H | 3.55939900  | 2.40274600  | 5.56632400  |
| N  | 1.12965500  | -0.74206500 | 0.75727100  | H | 1.81987900  | 1.11693900  | 0.20286600  |
| C  | 1.42639900  | -2.05309700 | 1.07078900  | H | 1.09457300  | 5.71694200  | -1.07300800 |
| C  | 2.67573900  | -2.48878000 | 1.58750300  | H | -4.33167900 | -5.17670100 | 0.77332300  |
| C  | 0.44204000  | -3.06219100 | 0.88436200  | C | 0.47278500  | 1.35067200  | -3.59791400 |
| C  | 2.91588600  | -3.83611700 | 1.86713700  | H | 0.32826900  | 0.65743200  | -4.43389400 |
| H  | 3.45343000  | -1.76649500 | 1.80916500  | H | 1.25415400  | 2.06058600  | -3.89047100 |
| C  | 0.69135300  | -4.39602400 | 1.17414600  | H | 0.84128700  | 0.77793500  | -2.74183100 |
| H  | -0.52897500 | -2.76826000 | 0.49051200  | C | -1.38433600 | 2.83209800  | -4.50620400 |
| C  | 1.93747200  | -4.80856800 | 1.66508700  | H | -2.34716000 | 3.31001500  | -4.29701500 |
| H  | 3.88752900  | -4.12036300 | 2.26629400  | H | -0.68816600 | 3.61470400  | -4.82665000 |
| H  | -0.09648000 | -5.12783700 | 1.00734800  | H | -1.52252900 | 2.14555200  | -5.34832900 |
| H  | 2.13165600  | -5.85321600 | 1.88884600  | C | -4.05725400 | -2.49534400 | -3.60563600 |
| B  | 3.42559100  | -0.20142200 | -0.19639700 | H | -4.31913800 | -3.55886800 | -3.61054600 |
| C  | 4.46006500  | -0.73931900 | -2.16978400 | H | -4.97248400 | -1.92884000 | -3.40399600 |
| O  | 3.19259000  | -0.68151800 | -1.46478600 | H | -3.71106200 | -2.23342300 | -4.61122900 |
| C  | 5.51313000  | -0.71195000 | -0.99006200 | C | -1.65565800 | -2.93779800 | -2.89509600 |
| O  | 4.76519000  | -0.06693800 | 0.07896900  | H | -1.80454300 | -4.02272300 | -2.91319600 |
| C  | 4.47763500  | -2.00531600 | -3.02539400 | H | -1.29196500 | -2.63889600 | -3.88413000 |
| H  | 3.69081900  | -1.94380300 | -3.78300200 | H | -0.87361700 | -2.71908200 | -2.16251500 |
| H  | 5.43719900  | -2.11738500 | -3.54170200 | C | -1.26841400 | 3.29753700  | 2.71743000  |
| H  | 4.29527300  | -2.89721500 | -2.42415600 | H | -0.62093600 | 4.15629500  | 2.92318100  |
| C  | 4.52099800  | 0.50274400  | -3.06984400 | H | -1.88647200 | 3.13044300  | 3.60632700  |
| H  | 4.48404000  | 1.42272100  | -2.47944900 | H | -0.62728300 | 2.42244400  | 2.57814800  |
| H  | 5.42915400  | 0.51809700  | -3.68019600 | C | -3.09542300 | 4.75183500  | 1.70869100  |
| H  | 3.65662900  | 0.49710900  | -3.73971700 | H | -2.52423500 | 5.67589800  | 1.84840800  |
| C  | 5.89983900  | -2.10676300 | -0.48018500 | H | -3.76759000 | 4.90257000  | 0.85733400  |
| H  | 6.51538700  | -2.64464100 | -1.20798500 | H | -3.70906500 | 4.60230000  | 2.60342200  |
| H  | 6.47795300  | -1.99550400 | 0.44162400  | C | -3.23677000 | -0.87987100 | 3.33971500  |
| H  | 5.01570500  | -2.70646300 | -0.25091800 | H | -3.35487000 | -0.07725700 | 4.07595800  |
| C  | 6.77155000  | 0.11248400  | -1.25846400 | H | -3.36634100 | -1.83400700 | 3.86159100  |
| H  | 6.53503200  | 1.15162400  | -1.49476600 | H | -2.21334700 | -0.84352900 | 2.95473900  |
| H  | 7.40675800  | 0.10659600  | -0.36807100 | C | -5.70523400 | -0.70204000 | 2.74712100  |

H -6.43645100 -0.56387100 1.94384900  
H -5.95281700 -1.63429100 3.26555700  
H -5.82990500 0.11628400 3.46416700

**L<sub>3</sub>-TS11**

C 2.01446300 0.54777100 -0.02114400  
C 3.83439700 1.91169000 0.09710400  
C 4.28879900 0.64272600 -0.05774200  
N 3.16801000 -0.17740200 -0.12778000  
N 2.44675800 1.83739900 0.11694500  
C 3.18580200 -2.15050700 -1.59448400  
C 3.23815000 -1.61264100 -0.29250300  
C 3.38917900 -2.41388400 0.85692100  
C 3.49202400 -3.79768000 0.67021500  
C 3.44595600 -4.35743000 -0.60320400  
C 3.29339100 -3.54111600 -1.71999300  
H 3.60749200 -4.44373500 1.53532500  
H 3.25400200 -3.98878400 -2.70785400  
C 1.15922200 3.63606800 -0.94812100  
C 0.33160800 4.75697100 -0.80909900  
C -0.05916300 5.21245100 0.44676300  
C 0.37015700 4.55189100 1.59410400  
C 1.19577500 3.42339300 1.51646400  
C 1.57735900 2.98764600 0.23173400  
H -0.01113300 5.27675700 -1.69862600  
H 0.05570000 4.91339400 2.56802400  
Cu 0.21400600 -0.01528200 -0.15482600  
H 5.28969700 0.24753100 -0.12173300  
H 4.35828900 2.84900700 0.19248200  
C 3.44214600 -1.83659500 2.26807400  
H 3.32928000 -0.75124400 2.19737600  
C 3.04758700 -1.28614100 -2.84416000  
H 2.84243200 -0.26050700 -2.52496100  
C 1.65609100 2.73153900 2.79544700  
H 2.18358900 1.81567800 2.51366000  
C 1.56718600 3.16899500 -2.34212200  
H 2.19953900 2.28346400 -2.23411800  
C -2.65040800 0.59292000 -0.14496500  
N -1.59345600 -0.49011900 -0.44245300  
C -1.75752600 -1.43576200 -1.48184900  
C -1.39367000 -2.77899900 -1.24372600  
C -2.19313800 -1.10528200 -2.78413300  
C -1.45519000 -3.73907600 -2.25171100

H -1.05882200 -3.05319000 -0.24900000  
C -2.26513200 -2.07454000 -3.78475400  
H -2.46671600 -0.08194100 -3.01083400  
C -1.89863000 -3.39846500 -3.53215300  
H -1.16527400 -4.76352700 -2.02986800  
H -2.60533400 -1.78551800 -4.77641200  
H -1.95712400 -4.14803900 -4.31618700  
B -2.65985300 -0.34577900 1.09744100  
C -3.33214400 -1.95840000 2.59756200  
O -3.60347800 -1.36364000 1.31380400  
C -2.61487800 -0.78061900 3.35919500  
O -1.93407100 -0.09056800 2.29034900  
C -4.66168200 -2.41147900 3.20308200  
H -5.08498700 -3.21645400 2.59451400  
H -4.52445900 -2.79373700 4.22072200  
H -5.38652100 -1.59587200 3.22877700  
C -2.41778500 -3.17520300 2.38696800  
H -1.44541700 -2.87048300 1.99215000  
H -2.25821800 -3.73121900 3.31684200  
H -2.88419100 -3.84430000 1.65869000  
C -3.60963700 0.21008600 3.98803700  
H -4.12133400 -0.21657900 4.85702200  
H -3.06311900 1.09997900 4.31388400  
H -4.36254800 0.52289900 3.25948600  
C -1.59209500 -1.21697200 4.40822300  
H -0.79212800 -1.81356200 3.96666900  
H -1.13846000 -0.33568200 4.87231500  
H -2.06865500 -1.80513100 5.20044800  
C -3.84706700 0.81153300 -1.02416600  
C -4.85185900 -0.15577300 -1.20831200  
C -4.00936400 2.05509400 -1.65805700  
C -5.96404400 0.11465300 -2.00477900  
H -4.76041900 -1.11374100 -0.71045900  
C -5.12591800 2.32984700 -2.44923600  
H -3.24525300 2.81798700 -1.52371500  
C -6.10845400 1.35567900 -2.62999800  
H -6.72697600 -0.64882400 -2.13391900  
H -5.22619800 3.30246100 -2.92461300  
H -6.97896000 1.56165600 -3.24707000  
H -2.13360300 1.54357300 0.00219500  
H 3.52655000 -5.43377300 -0.72565500  
H -0.70247900 6.08358300 0.53170700  
C 0.46992200 2.31429100 3.68565900  
H 0.83950800 1.76791800 4.56075200

|                         |             |             |             |    |             |             |             |
|-------------------------|-------------|-------------|-------------|----|-------------|-------------|-------------|
| H                       | -0.08058800 | 3.18606600  | 4.05641200  | H  | -2.93369100 | -4.77039300 | -1.22943300 |
| H                       | -0.23218000 | 1.66914400  | 3.14946200  | H  | -3.10207600 | -3.93337500 | 2.96666000  |
| C                       | 2.65138800  | 3.61750100  | 3.57213300  | C  | -1.48625500 | 3.67584300  | 0.57428100  |
| H                       | 3.52335900  | 3.87660900  | 2.96200600  | C  | -0.72694600 | 4.82997300  | 0.34622600  |
| H                       | 2.18144800  | 4.55341100  | 3.89352400  | C  | -0.30127100 | 5.17054400  | -0.93463200 |
| H                       | 3.00680700  | 3.09775200  | 4.46831900  | C  | -0.62878200 | 4.36117500  | -2.01846800 |
| C                       | 4.80099800  | -2.11290800 | 2.94102700  | C  | -1.38228300 | 3.19277700  | -1.85069300 |
| H                       | 4.83517500  | -1.65223800 | 3.93400700  | C  | -1.79562600 | 2.87276200  | -0.54188600 |
| H                       | 4.97565200  | -3.18670700 | 3.06703700  | H  | -0.46578800 | 5.46831500  | 1.18469400  |
| H                       | 5.63053700  | -1.70894000 | 2.35131600  | H  | -0.29084100 | 4.63577900  | -3.01269700 |
| C                       | 2.27679900  | -2.35607700 | 3.13122300  | Cu | -0.22805300 | -0.00056500 | 0.14633500  |
| H                       | 2.33163500  | -3.44095800 | 3.27117400  | H  | -5.29784900 | -0.11925500 | -0.07719100 |
| H                       | 2.30103200  | -1.89101100 | 4.12252400  | H  | -4.55937700 | 2.51252500  | -0.59405800 |
| H                       | 1.31316300  | -2.12276200 | 2.66950500  | C  | -3.01820000 | -2.22962800 | -2.18483100 |
| C                       | 1.86739700  | -1.72733900 | -3.72975000 | H  | -3.14146600 | -1.14301200 | -2.20772300 |
| H                       | 1.76095100  | -1.04071600 | -4.57645900 | C  | -3.23024300 | -1.22282100 | 2.86760600  |
| H                       | 2.02189400  | -2.73032700 | -4.14124000 | H  | -3.12900400 | -0.20720800 | 2.47428100  |
| H                       | 0.92490100  | -1.73503400 | -3.17626800 | C  | -1.73714100 | 2.33968600  | -3.06456600 |
| C                       | 4.36605300  | -1.26521300 | -3.64429500 | H  | -2.24912500 | 1.44064600  | -2.70972700 |
| H                       | 5.20130800  | -0.90160900 | -3.03633200 | C  | -1.93662200 | 3.33487800  | 1.99173700  |
| H                       | 4.62750700  | -2.26639100 | -4.00399000 | H  | -2.53783600 | 2.42220100  | 1.94836500  |
| H                       | 4.27220100  | -0.61094700 | -4.51767400 | C  | 2.59804800  | 0.78748400  | 0.08845000  |
| C                       | 2.40255700  | 4.23953300  | -3.07172400 | N  | 1.62497900  | -0.39445100 | 0.44371100  |
| H                       | 1.82518900  | 5.15518400  | -3.23801100 | C  | 1.81331200  | -1.17851400 | 1.62164100  |
| H                       | 3.29623300  | 4.50994600  | -2.49958900 | C  | 1.84792500  | -2.57997300 | 1.52923600  |
| H                       | 2.72528900  | 3.86867400  | -4.05037500 | C  | 1.90780100  | -0.58788500 | 2.89444600  |
| C                       | 0.34127100  | 2.75237200  | -3.17790000 | C  | 1.95191100  | -3.36504400 | 2.67749200  |
| H                       | -0.33075400 | 3.59922300  | -3.35383200 | H  | 1.79532800  | -3.04006600 | 0.54995600  |
| H                       | 0.65927100  | 2.37316200  | -4.15505800 | C  | 2.02060700  | -1.37875600 | 4.03763400  |
| H                       | -0.23083400 | 1.96573400  | -2.67703200 | H  | 1.90416500  | 0.49375000  | 2.97758500  |
| <b>L<sub>3</sub>-12</b> |             |             |             | C  | 2.03936200  | -2.77222500 | 3.93900700  |
| C                       | -2.05807800 | 0.44494200  | -0.05810400 | H  | 1.97437100  | -4.44781200 | 2.58258200  |
| C                       | -3.96895800 | 1.63495000  | -0.38573200 | H  | 2.09652900  | -0.90067900 | 5.01095600  |
| C                       | -4.32940300 | 0.35112700  | -0.13241100 | H  | 2.12776500  | -3.38564100 | 4.83116100  |
| N                       | -3.15267100 | -0.36161400 | 0.06466900  | B  | 2.50625300  | -0.47799700 | -0.87477500 |
| N                       | -2.58088600 | 1.67553700  | -0.33581700 | C  | 3.50803900  | -2.04015300 | -2.27928700 |
| C                       | -3.13009100 | -2.19709000 | 1.69766900  | O  | 3.57494600  | -1.42739800 | -0.98652000 |
| C                       | -3.10215400 | -1.77840400 | 0.35236700  | C  | 2.69216600  | -0.98059600 | -3.11539800 |
| C                       | -3.03967800 | -2.68124700 | -0.72757200 | O  | 1.78353600  | -0.46100400 | -2.13216900 |
| C                       | -2.99066800 | -4.04700200 | -0.42191000 | C  | 4.93681800  | -2.29152900 | -2.76888800 |
| C                       | -3.01215900 | -4.49098100 | 0.89689300  | H  | 5.42339100  | -3.02559400 | -2.11868100 |
| C                       | -3.08500400 | -3.57504400 | 1.94228800  | H  | 4.94528600  | -2.68791600 | -3.79077300 |
|                         |             |             |             | H  | 5.53133100  | -1.37654500 | -2.74096500 |
|                         |             |             |             | C  | 2.76653400  | -3.38243000 | -2.14962800 |



|   |             |             |             |                         |             |             |             |
|---|-------------|-------------|-------------|-------------------------|-------------|-------------|-------------|
| C | 2.70126000  | 3.43878000  | 1.34833100  | H                       | -4.10840600 | 2.77274300  | -0.85340900 |
| H | 3.16517300  | 2.47215500  | 1.13299200  | C                       | -7.05982600 | 1.10311700  | -0.59346500 |
| C | 0.39401600  | 2.28631400  | -3.11610400 | H                       | -7.25756900 | -0.91459700 | 0.13988800  |
| H | 1.08035400  | 1.43940500  | -3.02798000 | H                       | -6.52503500 | 3.08271400  | -1.26445000 |
| C | -2.83319000 | 0.65749600  | 0.18223500  | H                       | -8.12264700 | 1.23095500  | -0.78033800 |
| N | -2.03339200 | -0.59681900 | -0.14248300 | H                       | -2.29748300 | 1.56186700  | -0.11741900 |
| C | -2.45660900 | -1.62636900 | -0.98517600 | C                       | 2.05076100  | 3.32826600  | 2.73954800  |
| C | -2.21297100 | -2.97080100 | -0.63098800 | H                       | 1.59015700  | 4.27277800  | 3.04770300  |
| C | -3.09051600 | -1.37665400 | -2.21997800 | H                       | 1.27493200  | 2.55754500  | 2.74737500  |
| C | -2.57946900 | -4.01392500 | -1.47971800 | H                       | 2.80356300  | 3.06739500  | 3.49147100  |
| H | -1.74269700 | -3.18185600 | 0.32362700  | C                       | 3.82222000  | 4.49742100  | 1.34040800  |
| C | -3.45161800 | -2.42664300 | -3.06196200 | H                       | 4.31733200  | 4.54910200  | 0.36518100  |
| H | -3.31433700 | -0.35330600 | -2.50024900 | H                       | 3.43115200  | 5.49499900  | 1.56712900  |
| C | -3.19913500 | -3.75401600 | -2.70529100 | H                       | 4.58051700  | 4.25758200  | 2.09353200  |
| H | -2.38446400 | -5.03998000 | -1.17598200 | C                       | 5.86521700  | -1.04253300 | 1.39071000  |
| H | -3.94350300 | -2.20332700 | -4.00581200 | H                       | 6.08865200  | -0.73802000 | 0.36352300  |
| H | -3.48901300 | -4.56846200 | -3.36280200 | H                       | 6.30576500  | -0.30056000 | 2.06553600  |
| B | -2.23489200 | -0.30759100 | 1.31363200  | H                       | 6.36542400  | -2.00052000 | 1.56975800  |
| C | -2.21290300 | -1.31621000 | 3.43170700  | C                       | 4.06211600  | -1.49098200 | 3.10989100  |
| O | -3.00198900 | -1.03864900 | 2.27617400  | H                       | 2.99061400  | -1.59790400 | 3.29744200  |
| C | -1.13299800 | -0.16318000 | 3.42258100  | H                       | 4.55625700  | -2.41516300 | 3.42728300  |
| O | -0.94106900 | 0.01810900  | 1.99892600  | H                       | 4.44058400  | -0.68690900 | 3.74971200  |
| C | -3.13062300 | -1.30380100 | 4.65745200  | C                       | -1.03020100 | 1.70862200  | -3.20729800 |
| H | -3.84455600 | -2.12960600 | 4.58341600  | H                       | -1.27936400 | 1.12659200  | -2.31686100 |
| H | -2.56273300 | -1.42956200 | 5.58636100  | H                       | -1.77858400 | 2.50106100  | -3.31599400 |
| H | -3.70210500 | -0.37573200 | 4.71390200  | H                       | -1.11582700 | 1.04966800  | -4.07769900 |
| C | -1.58082400 | -2.71174100 | 3.27714000  | C                       | 0.77312500  | 3.04709600  | -4.40254400 |
| H | -0.86764200 | -2.73315300 | 2.44817100  | H                       | 1.79913100  | 3.42797800  | -4.35938500 |
| H | -1.06598000 | -3.03978900 | 4.18671000  | H                       | 0.69274900  | 2.38517000  | -5.27118400 |
| H | -2.37702800 | -3.42765600 | 3.05554600  | H                       | 0.10867800  | 3.90045500  | -4.57410700 |
| C | -1.67578300 | 1.15976200  | 3.98205800  | C                       | 0.70078200  | -3.06651500 | -3.16813500 |
| H | -1.80342200 | 1.11699800  | 5.06809400  | H                       | 0.95097100  | -4.10348200 | -3.41824600 |
| H | -0.96981900 | 1.96339600  | 3.75154500  | H                       | -0.04172200 | -3.07660700 | -2.36759200 |
| H | -2.63616400 | 1.40747300  | 3.52404200  | H                       | 0.23004900  | -2.62778500 | -4.05328600 |
| C | 0.19550600  | -0.51563300 | 4.08370400  | C                       | 2.99589300  | -2.30834100 | -3.91934600 |
| H | 0.66057100  | -1.38203600 | 3.60893600  | H                       | 3.86640200  | -1.67913500 | -3.70807700 |
| H | 0.88974000  | 0.32843100  | 4.01644100  | H                       | 3.35386000  | -3.33326500 | -4.06691500 |
| H | 0.04869300  | -0.74184300 | 5.14528900  | H                       | 2.55512100  | -1.96759500 | -4.86228500 |
| C | -4.29008000 | 0.76094600  | -0.10481500 | H                       | 3.42818700  | -5.53550600 | 0.21658900  |
| C | -5.20974400 | -0.27103300 | 0.16786300  | H                       | -0.65781900 | 6.07376300  | -0.57370200 |
| C | -4.79989300 | 1.96267000  | -0.62969700 |                         |             |             |             |
| C | -6.57081900 | -0.10050100 | -0.07866600 |                         |             |             |             |
| H | -4.85399800 | -1.20266900 | 0.59272600  |                         |             |             |             |
| C | -6.16401800 | 2.13859400  | -0.86320300 |                         |             |             |             |
|   |             |             |             | <b>L<sub>3</sub>-14</b> |             |             |             |
|   |             |             |             | C                       | 1.70887000  | -0.99266500 | 0.00106200  |

|    |             |             |             |   |             |             |             |
|----|-------------|-------------|-------------|---|-------------|-------------|-------------|
| C  | 3.69162400  | -2.01698000 | 0.44435800  | B | -2.24337700 | 1.82141700  | -0.46888600 |
| C  | 2.75748500  | -2.98838000 | 0.29425800  | C | -1.78341700 | 3.17760200  | -2.32386800 |
| N  | 1.55295100  | -2.34962700 | 0.02809900  | O | -2.73559400 | 2.86107600  | -1.32264700 |
| N  | 3.03910200  | -0.80556100 | 0.25687700  | C | -0.41511500 | 2.95641800  | -1.58150400 |
| C  | -0.13605300 | -3.28090900 | -1.49829000 | O | -0.73586100 | 1.78872800  | -0.76328400 |
| C  | 0.31064900  | -3.06420300 | -0.17949400 | C | -1.96772400 | 2.22329900  | -3.51987500 |
| C  | -0.37587700 | -3.55547000 | 0.95107600  | H | -3.00829200 | 2.28556400  | -3.84910200 |
| C  | -1.56077900 | -4.26496300 | 0.72308600  | H | -1.32113100 | 2.48095000  | -4.36589800 |
| C  | -2.03896700 | -4.47651900 | -0.56695300 | H | -1.77468000 | 1.18698900  | -3.23006400 |
| C  | -1.33168000 | -3.99153000 | -1.66283500 | C | -2.01686300 | 4.62114300  | -2.77947000 |
| H  | -2.11894800 | -4.65315200 | 1.56884700  | H | -2.03110300 | 5.30756100  | -1.93081900 |
| H  | -1.71056400 | -4.16768400 | -2.66470500 | H | -1.25010700 | 4.94966900  | -3.49043500 |
| C  | 4.42815600  | 0.91683700  | -0.80712700 | H | -2.98914700 | 4.68754500  | -3.27626800 |
| C  | 5.07640100  | 2.15398300  | -0.71324100 | C | 0.76947700  | 2.64492000  | -2.49224000 |
| C  | 5.00656100  | 2.91783100  | 0.44914800  | H | 0.93719300  | 3.47217100  | -3.19064300 |
| C  | 4.29350700  | 2.45323400  | 1.54981100  | H | 1.68478300  | 2.52070800  | -1.90317600 |
| C  | 3.62909800  | 1.21976400  | 1.51841400  | H | 0.60159300  | 1.73596300  | -3.07486800 |
| C  | 3.70340300  | 0.47809300  | 0.32202800  | C | -0.06334800 | 4.10525600  | -0.62837600 |
| H  | 5.64498200  | 2.52274900  | -1.56099900 | H | -0.92409500 | 4.37061200  | -0.01089300 |
| H  | 4.25366200  | 3.05272700  | 2.45359400  | H | 0.75338600  | 3.79311800  | 0.03026200  |
| Cu | 0.43883900  | 0.36647800  | -0.34243200 | H | 0.26157500  | 4.99522800  | -1.17657800 |
| H  | 2.83147400  | -4.06189900 | 0.35274200  | C | -4.33426000 | 0.01504500  | -0.40791500 |
| H  | 4.74485500  | -2.06986600 | 0.66657400  | C | -5.43751800 | 0.87905700  | -0.29480200 |
| C  | 0.14463500  | -3.38591900 | 2.37643500  | C | -4.55558600 | -1.26326000 | -0.94944900 |
| H  | 0.97130700  | -2.66948000 | 2.35493600  | C | -6.70635900 | 0.47906100  | -0.71086500 |
| C  | 0.63202100  | -2.80954300 | -2.72992100 | H | -5.27967100 | 1.86663100  | 0.12655900  |
| H  | 1.52397600  | -2.27397600 | -2.39286400 | C | -5.82457900 | -1.66198300 | -1.36975400 |
| C  | 2.90586000  | 0.71907500  | 2.76550000  | H | -3.71795000 | -1.95266300 | -1.03548300 |
| H  | 2.37572100  | -0.20132000 | 2.50630300  | C | -6.91122200 | -0.79252400 | -1.25362400 |
| C  | 4.56617700  | 0.07926000  | -2.07725100 | H | -7.54365600 | 1.16575500  | -0.60953100 |
| H  | 3.83910600  | -0.73676900 | -2.02625000 | H | -5.96731800 | -2.65845700 | -1.78268500 |
| C  | -2.96098600 | 0.43806600  | -0.01686600 | H | -7.90174100 | -1.10161000 | -1.57663500 |
| N  | -2.79437800 | 1.60033900  | 0.86920700  | H | -2.31013300 | -0.41713400 | 0.22577800  |
| C  | -2.50062300 | 1.59669500  | 2.20969600  | H | -2.96542400 | -5.02249700 | -0.71797700 |
| C  | -1.89679500 | 2.72538800  | 2.81477800  | H | 5.51528700  | 3.87630100  | 0.49822100  |
| C  | -2.82965200 | 0.50228200  | 3.04212400  | C | -0.91697800 | -2.81691500 | 3.33374000  |
| C  | -1.63647900 | 2.74880000  | 4.18132400  | H | -1.76463100 | -3.49976300 | 3.45413900  |
| H  | -1.66068100 | 3.58448100  | 2.19402100  | H | -0.47841100 | -2.66474200 | 4.32559800  |
| C  | -2.56283100 | 0.54110500  | 4.41005300  | H | -1.30178800 | -1.85507100 | 2.98690700  |
| H  | -3.32872100 | -0.35511700 | 2.60064600  | C | 0.70188900  | -4.72197700 | 2.91180200  |
| C  | -1.96033300 | 1.65753700  | 4.99642200  | H | -0.08627000 | -5.48035300 | 2.96959500  |
| H  | -1.17970200 | 3.63410800  | 4.61870800  | H | 1.49589800  | -5.12028800 | 2.27116400  |
| H  | -2.84128200 | -0.31015600 | 5.02770000  | H | 1.11357000  | -4.58899700 | 3.91784400  |
| H  | -1.76258400 | 1.68497000  | 6.06399900  | C | 1.85013300  | 1.71862900  | 3.27043600  |

|   |             |             |             |    |             |             |             |
|---|-------------|-------------|-------------|----|-------------|-------------|-------------|
| H | 1.30912600  | 1.30216000  | 4.12508300  | C  | -0.43403200 | 2.96500000  | 0.19313500  |
| H | 2.30555800  | 2.66070100  | 3.59481500  | H  | -2.39527600 | 3.93861000  | -2.39601400 |
| H | 1.10902100  | 1.94865900  | 2.50043400  | H  | -3.21518200 | 4.05367200  | 1.79983800  |
| C | 3.91728800  | 0.36747000  | 3.87583000  | Cu | 0.12314400  | -0.26841100 | -0.35622900 |
| H | 4.64127300  | -0.38250500 | 3.53969900  | H  | 4.03799800  | 2.56498200  | 1.29423800  |
| H | 4.47860100  | 1.25115800  | 4.19789800  | H  | 1.84053700  | 4.24979400  | 1.12222400  |
| H | 3.39443600  | -0.03224600 | 4.75085500  | C  | 2.74344700  | -0.94964600 | 2.65271500  |
| C | 4.25850000  | 0.87706300  | -3.35768000 | H  | 1.81212500  | -0.42648100 | 2.41753600  |
| H | 4.98242700  | 1.68179300  | -3.52183900 | C  | 4.31606200  | 1.13178700  | -1.79527400 |
| H | 4.30526900  | 0.21556900  | -4.22912600 | H  | 3.44156400  | 1.75999700  | -1.60527800 |
| H | 3.26124100  | 1.32306800  | -3.32251300 | C  | -0.87181200 | 3.06103200  | 2.73814100  |
| C | 5.97099800  | -0.55398800 | -2.16062800 | H  | -0.00970600 | 2.38605800  | 2.75432700  |
| H | 6.74569600  | 0.21794000  | -2.22152700 | C  | 0.12840500  | 2.97985300  | -2.33314500 |
| H | 6.19015600  | -1.17284800 | -1.28472000 | H  | 1.03240600  | 2.48564500  | -1.96862000 |
| H | 6.05524800  | -1.18624400 | -3.05089200 | C  | -1.92647600 | -1.15201600 | 0.67960700  |
| C | -0.19747100 | -1.82637800 | -3.57702000 | N  | -2.90936900 | -1.62701700 | -0.30391800 |
| H | 0.38779500  | -1.47546900 | -4.43396300 | C  | -3.94962100 | -0.86125900 | -0.80491900 |
| H | -1.10682400 | -2.29619700 | -3.96549600 | C  | -4.47831700 | -1.13444900 | -2.08515100 |
| H | -0.50089400 | -0.95568100 | -2.98817700 | C  | -4.54338400 | 0.17052900  | -0.04985800 |
| C | 1.11243300  | -4.00528700 | -3.57655900 | C  | -5.54959700 | -0.40006900 | -2.58394200 |
| H | 1.73173300  | -4.68980500 | -2.98776000 | H  | -4.04272200 | -1.93746600 | -2.67147200 |
| H | 0.26937300  | -4.57880600 | -3.97557200 | C  | -5.61697300 | 0.89826400  | -0.56112900 |
| H | 1.70688200  | -3.65461000 | -4.42696000 | H  | -4.16731400 | 0.37996800  | 0.94659200  |

### L<sub>3</sub>-TS15

|   |             |             |             |   |             |             |             |
|---|-------------|-------------|-------------|---|-------------|-------------|-------------|
| C | 1.26788300  | 1.12705100  | 0.24148900  | H | -5.93753400 | -0.63291800 | -3.57294500 |
| C | 1.94723800  | 3.19887800  | 0.91078700  | H | -6.06162000 | 1.68285600  | 0.04704400  |
| C | 3.02126900  | 2.37778800  | 0.99010000  | H | -6.96911300 | 1.19326100  | -2.22326100 |
| N | 2.59771900  | 1.11901200  | 0.57297900  | B | -1.60401300 | -2.08757800 | -0.73657000 |
| N | 0.88294800  | 2.42540600  | 0.46131100  | C | -0.10055200 | -3.66704400 | -1.57448200 |
| C | 4.34093100  | 0.01662000  | -0.75070700 | O | -1.26657700 | -3.46751800 | -0.77727500 |
| C | 3.51328200  | 0.01208500  | 0.39281700  | C | -0.16587900 | -2.46286300 | -2.59041100 |
| C | 3.58737900  | -0.99308300 | 1.38098200  | O | -0.76492600 | -1.41468900 | -1.77537800 |
| C | 4.51647200  | -2.02169000 | 1.18135500  | C | 1.14036300  | -3.61909600 | -0.66632400 |
| C | 5.34021700  | -2.04651900 | 0.05927100  | H | 1.01023300  | -4.35328800 | 0.13361200  |
| C | 5.25397000  | -1.03629200 | -0.89249100 | H | 2.06243800  | -3.85439300 | -1.20779900 |
| H | 4.59717400  | -2.81426800 | 1.91660800  | H | 1.26126100  | -2.63658600 | -0.19769500 |
| H | 5.90696800  | -1.06116000 | -1.75926400 | C | -0.19504200 | -5.04795000 | -2.23004900 |
| C | -0.80330300 | 3.21245900  | -1.14640800 | H | -1.13596500 | -5.16733900 | -2.77003400 |
| C | -2.07669200 | 3.74789600  | -1.37628400 | H | 0.63582300  | -5.22030100 | -2.92355700 |
| C | -2.93708400 | 4.04336400  | -0.32512900 | H | -0.15563400 | -5.81978500 | -1.45573900 |
| C | -2.53743400 | 3.81358100  | 0.98755700  | C | 1.18025900  | -1.98277100 | -3.12228900 |
| C | -1.28263300 | 3.26664000  | 1.28128800  | H | 1.67449800  | -2.77760200 | -3.69127500 |
|   |             |             |             | H | 1.03363000  | -1.13001100 | -3.79293700 |
|   |             |             |             | H | 1.84628900  | -1.67358100 | -2.31353100 |



|   |             |             |             |                         |             |             |             |
|---|-------------|-------------|-------------|-------------------------|-------------|-------------|-------------|
| C | -1.13004700 | -2.72199700 | -3.75546600 | H                       | 1.04926400  | 4.96804600  | -2.21478400 |
| H | -2.08751200 | -3.10340900 | -3.39310100 | H                       | 1.26551600  | 4.15551300  | -3.77608800 |
| H | -1.31352000 | -1.78262000 | -4.28455700 | C                       | -0.49585400 | 2.05314700  | -3.39368300 |
| H | -0.71675300 | -3.44412500 | -4.46640600 | H                       | -0.78072100 | 1.08796300  | -2.96540000 |
| C | -1.97677000 | -1.73217900 | 2.05285100  | H                       | -1.38860900 | 2.49768900  | -3.84599100 |
| C | -2.74501500 | -2.87265600 | 2.34316600  | H                       | 0.22380900  | 1.87295000  | -4.20029200 |
| C | -1.23857900 | -1.15752900 | 3.10280900  |                         |             |             |             |
| C | -2.77389000 | -3.40956500 | 3.62992300  | <b>L<sub>3</sub>-16</b> |             |             |             |
| H | -3.32288800 | -3.32167300 | 1.54245500  |                         |             |             |             |
| C | -1.27427600 | -1.68891000 | 4.39253000  | Cu                      | 0.37692500  | -0.20265800 | -0.07665200 |
| H | -0.63192600 | -0.27700500 | 2.90145200  | N                       | -2.49504900 | 0.11242100  | -0.62184000 |
| C | -2.04204100 | -2.82356400 | 4.66570700  | N                       | 2.66951000  | 1.53500100  | 0.77541500  |
| H | -3.37983700 | -4.29075700 | 3.82659800  | N                       | 3.20638100  | -0.54659300 | 0.68606500  |
| H | -0.70614700 | -1.21128700 | 5.18797400  | O                       | -4.90700500 | 0.68122000  | -0.22415200 |
| H | -2.07174500 | -3.24072400 | 5.66842900  | O                       | -3.95543300 | -1.00711400 | 1.01289800  |
| H | -1.85413300 | -0.05228500 | 0.70193700  | B                       | -3.75407700 | -0.05071700 | 0.02722200  |
| H | -3.92171700 | 4.45306400  | -0.52907500 | C                       | 2.16540600  | 0.30757300  | 0.44369100  |
| H | 6.05391500  | -2.85515100 | -0.07045000 | C                       | 3.98523100  | 1.44244400  | 1.21735900  |
| C | 3.46895000  | -0.14550200 | 3.75344400  | C                       | 4.32529800  | 0.13119600  | 1.15675300  |
| H | 4.41987300  | -0.62106500 | 4.01838100  | C                       | 3.16087500  | -1.98153500 | 0.51402600  |
| H | 3.68338600  | 0.88010900  | 3.43703100  | C                       | 3.45084900  | -2.52465800 | -0.75320100 |
| H | 2.85291700  | -0.09677800 | 4.65764300  | C                       | 3.43796000  | -3.91970100 | -0.87533400 |
| C | 2.35457400  | -2.34278500 | 3.17512000  | H                       | 3.65181900  | -4.36999200 | -1.83971500 |
| H | 1.90181500  | -2.95527900 | 2.39086200  | C                       | 3.15106500  | -4.73667800 | 0.21386200  |
| H | 3.21639200  | -2.88369200 | 3.58157800  | C                       | 2.86288100  | -4.17209000 | 1.45325100  |
| H | 1.61885500  | -2.24468200 | 3.97735000  | H                       | 2.63353000  | -4.81825100 | 2.29526700  |
| C | -1.97965800 | 2.41123800  | 3.58810300  | C                       | 2.85890100  | -2.78349300 | 1.63350600  |
| H | -1.59669800 | 2.18920000  | 4.58957800  | C                       | 2.53094400  | -2.20155100 | 3.00582000  |
| H | -2.83919600 | 3.07785600  | 3.71251600  | C                       | 3.76981200  | -1.66342400 | -1.97064100 |
| H | -2.33310700 | 1.47420100  | 3.15237600  | C                       | 1.95177100  | 2.78835600  | 0.69432900  |
| C | -0.43683100 | 4.39657000  | 3.37976700  | C                       | 2.20192300  | 3.63497800  | -0.40537500 |
| H | -0.11192200 | 4.23692800  | 4.41345200  | C                       | 3.16661100  | 3.26360600  | -1.52850300 |
| H | 0.38806300  | 4.86809700  | 2.83697600  | C                       | 1.53980800  | 4.86779900  | -0.43525500 |
| H | -1.26973500 | 5.10791400  | 3.39522900  | H                       | 1.70992400  | 5.54251100  | -1.26811400 |
| C | 4.18251500  | 0.59839600  | -3.23357400 | C                       | 0.66069600  | 5.23799000  | 0.57805700  |
| H | 4.10686700  | 1.43535400  | -3.93589100 | C                       | 0.42719400  | 4.37913000  | 1.64712100  |
| H | 5.05133300  | 0.00210100  | -3.53100300 | H                       | -0.26347500 | 4.67569000  | 2.43052900  |
| H | 3.29149100  | -0.02334000 | -3.34803500 | C                       | 1.06800400  | 3.13701200  | 1.73532700  |
| C | 5.56718900  | 2.02630900  | -1.66896400 | C                       | 0.80021400  | 2.23832200  | 2.93858200  |
| H | 5.65586100  | 2.46327900  | -0.66946600 | C                       | -1.45032400 | -0.90688900 | -0.32126000 |
| H | 6.48045100  | 1.45283800  | -1.86085900 | H                       | -1.65780100 | -1.24194300 | 0.70150400  |
| H | 5.52677200  | 2.84620000  | -2.39394000 | C                       | -2.23005100 | 1.12985200  | -1.56767400 |
| C | 0.56137400  | 4.32401500  | -2.95398300 | C                       | -1.26668800 | 0.94521900  | -2.57979900 |
| H | -0.29670300 | 4.87205300  | -3.35753200 | H                       | -0.74178500 | 0.00093300  | -2.65140600 |



|   |             |             |             |    |             |             |             |
|---|-------------|-------------|-------------|----|-------------|-------------|-------------|
| C | 3.74029700  | -2.42453100 | 1.30326600  | C  | -5.60821800 | -1.35914900 | -1.06724500 |
| C | 3.96315500  | -2.52170600 | -0.03081900 | C  | -5.96896000 | -2.77673800 | -1.50895800 |
| C | 2.72383400  | -1.87290300 | -2.09626600 | H  | -5.58757500 | -2.95225700 | -2.51914100 |
| C | 3.17394900  | -0.72161000 | -2.77379300 | H  | -7.05499500 | -2.91757200 | -1.52856600 |
| C | 3.07538200  | -0.71722300 | -4.17076000 | H  | -5.53063400 | -3.52780500 | -0.84920500 |
| H | 3.41435300  | 0.15342500  | -4.72269100 | C  | -6.06703900 | -0.34549200 | -2.12575200 |
| C | 2.54496500  | -1.80339600 | -4.86089000 | H  | -5.81258300 | 0.67638000  | -1.83123800 |
| C | 2.09292900  | -2.92023800 | -4.16390300 | H  | -7.14595600 | -0.40042100 | -2.30181400 |
| H | 1.67028600  | -3.75779000 | -4.71066900 | H  | -5.55124800 | -0.55948500 | -3.06575300 |
| C | 2.17187800  | -2.98294400 | -2.76713700 | C  | -1.53251900 | 0.81036900  | -1.94712900 |
| C | 1.66065000  | -4.22209400 | -2.03783100 | C  | -0.81489900 | 0.49584300  | -3.12181500 |
| C | 3.75979100  | 0.48600800  | -2.04896900 | H  | -0.28771800 | -0.45466800 | -3.17671000 |
| C | 1.94495000  | -1.47231000 | 2.75016800  | C  | -0.76569300 | 1.36796200  | -4.20512200 |
| C | 2.44327500  | -0.35894500 | 3.45801700  | H  | -0.20611700 | 1.08526400  | -5.09380200 |
| C | 3.54715000  | 0.54218000  | 2.91052100  | C  | -1.42978200 | 2.59978300  | -4.15713500 |
| C | 1.90022300  | -0.10270500 | 4.72224500  | H  | -1.39007300 | 3.28277100  | -5.00120600 |
| H | 2.26018000  | 0.74786100  | 5.29232400  | C  | -2.15046700 | 2.92717000  | -3.00973100 |
| C | 0.90214200  | -0.91253800 | 5.25549700  | H  | -2.68289400 | 3.87406900  | -2.95331600 |
| C | 0.42952000  | -2.00393600 | 4.53398100  | C  | -2.20449200 | 2.04620900  | -1.92376100 |
| H | -0.35013000 | -2.62859000 | 4.95883800  | H  | -2.78808800 | 2.31452300  | -1.04890800 |
| C | 0.94053100  | -2.31450600 | 3.26770900  | H  | 3.71577100  | 0.27420000  | 1.86359200  |
| C | 0.41445400  | -3.53905600 | 2.52508300  | H  | 0.91189400  | -3.58754700 | 1.55285700  |
| C | -1.55675600 | -0.17390900 | -0.80718600 | H  | 1.79018100  | -4.06300600 | -0.96381300 |
| H | -1.87870900 | -1.12924900 | -1.23656200 | H  | 3.53704300  | 0.37840600  | -0.98395600 |
| C | -2.19812000 | 0.98857100  | 1.32461200  | C  | -1.70418800 | 5.96278400  | 0.13534200  |
| C | -1.09998000 | 1.86618700  | 1.21650100  | H  | -2.31678000 | 6.80546100  | 0.44183300  |
| H | -0.52986700 | 1.89138200  | 0.29644000  | H  | -2.05372700 | 4.97171000  | 0.41206900  |
| C | -0.74852900 | 2.71784800  | 2.26646400  | Br | 2.04408300  | 4.99377100  | -0.03062400 |
| H | 0.08826200  | 3.39846500  | 2.13147800  | C  | -0.56755300 | 6.14045500  | -0.54255900 |
| C | -1.47162800 | 2.71628000  | 3.45896700  | H  | -0.22445800 | 7.14353500  | -0.78955200 |
| H | -1.20146800 | 3.38340700  | 4.27238500  | C  | 0.28165400  | 5.01623000  | -1.01286400 |
| C | -2.55181700 | 1.83954000  | 3.58256500  | H  | -0.16111100 | 4.04002200  | -0.83065600 |
| H | -3.12586000 | 1.81122300  | 4.50570300  | H  | 0.58021300  | 5.10439500  | -2.05655300 |
| C | -2.91178400 | 0.98770400  | 2.54078200  | H  | 2.47774200  | -1.77688200 | -5.94482400 |
| H | -3.75764000 | 0.32438800  | 2.66042300  | H  | 0.48958100  | -0.69040800 | 6.23539200  |
| C | -6.05774900 | -0.97515400 | 0.39454600  | H  | 4.32592700  | -2.74757800 | 2.14855600  |
| C | -7.38487900 | -0.22496800 | 0.49391800  | H  | 4.78254200  | -2.94708300 | -0.58740100 |
| H | -7.59118800 | 0.02084900  | 1.53988300  | C  | 4.87246200  | 0.31397600  | 3.66599000  |
| H | -8.21105500 | -0.84028400 | 0.12169700  | H  | 4.77172400  | 0.57169000  | 4.72592200  |
| H | -7.36156100 | 0.70832500  | -0.07115200 | H  | 5.19757300  | -0.73028800 | 3.60944200  |
| C | -6.05531200 | -2.17045900 | 1.35873700  | H  | 5.66684100  | 0.93877400  | 3.24369400  |
| H | -5.11076600 | -2.71921800 | 1.30415500  | C  | 3.15342600  | 2.03028900  | 2.93485800  |
| H | -6.87364000 | -2.86520900 | 1.14610000  | H  | 3.03987000  | 2.40452200  | 3.95796600  |
| H | -6.17535100 | -1.80182200 | 2.38146800  | H  | 3.92993000  | 2.63159800  | 2.45059900  |

|                           |             |             |             |   |             |             |             |
|---------------------------|-------------|-------------|-------------|---|-------------|-------------|-------------|
| H                         | 2.21186800  | 2.20183900  | 2.40843600  | H | -0.55449400 | 5.12056300  | -1.96747900 |
| C                         | 3.11553900  | 1.80646400  | -2.51157900 | C | 0.62746400  | 3.33431400  | -1.77347400 |
| H                         | 3.42770600  | 2.62944300  | -1.86142400 | C | -0.14054400 | 2.59877900  | -2.86972900 |
| H                         | 3.40986500  | 2.06428200  | -3.53516400 | C | 3.72514500  | 2.90759800  | 0.52499900  |
| H                         | 2.02393300  | 1.74606100  | -2.48222600 | C | 2.12087100  | -2.14233900 | -1.63374300 |
| C                         | 5.29361100  | 0.53273800  | -2.20075200 | C | 3.13701900  | -2.94601800 | -1.07411500 |
| H                         | 5.76623800  | -0.37365600 | -1.80756200 | C | 4.44606300  | -2.37499600 | -0.53454600 |
| H                         | 5.58270700  | 0.62967900  | -3.25314500 | C | 2.93926400  | -4.33374700 | -1.08462700 |
| H                         | 5.70493100  | 1.39147600  | -1.65958600 | H | 3.69924000  | -4.97979800 | -0.65826400 |
| C                         | -1.09863900 | -3.43393400 | 2.25306700  | C | 1.79371100  | -4.89869200 | -1.63457100 |
| H                         | -1.43887800 | -4.29993500 | 1.67458600  | C | 0.81863800  | -4.08449000 | -2.20304900 |
| H                         | -1.67363000 | -3.41083400 | 3.18502600  | H | -0.06522300 | -4.53700500 | -2.63885600 |
| H                         | -1.33683200 | -2.52855100 | 1.68679200  | C | 0.96052700  | -2.69221700 | -2.22491400 |
| C                         | 0.75641400  | -4.83818100 | 3.28165400  | C | -0.07997300 | -1.82961900 | -2.93573300 |
| H                         | 1.83547300  | -4.93813900 | 3.43910800  | C | -1.34351500 | 0.35606300  | 0.73314100  |
| H                         | 0.27293100  | -4.86885000 | 4.26389300  | H | -1.21948600 | 0.75825300  | -0.27669200 |
| H                         | 0.41352100  | -5.71088500 | 2.71532100  | C | -2.06070600 | -2.02510500 | 1.28293100  |
| C                         | 2.47269900  | -5.47597100 | -2.41694700 | C | -0.85661300 | -2.71307000 | 1.06508700  |
| H                         | 2.11825300  | -6.34547500 | -1.85308700 | H | -0.11004700 | -2.28126900 | 0.40666200  |
| H                         | 2.37561700  | -5.70909100 | -3.48259800 | C | -0.61383100 | -3.94604800 | 1.66974100  |
| H                         | 3.53825100  | -5.34402500 | -2.20193600 | H | 0.32585900  | -4.45528300 | 1.47496900  |
| C                         | 0.15476100  | -4.43787000 | -2.28427400 | C | -1.57579300 | -4.52955300 | 2.49779400  |
| H                         | -0.05575500 | -4.63506300 | -3.34085200 | H | -1.38919600 | -5.49198700 | 2.96575300  |
| H                         | -0.20419000 | -5.29797900 | -1.70861100 | C | -2.78306800 | -3.86178400 | 2.70889500  |
| H                         | -0.42394700 | -3.55939800 | -1.98371800 | H | -3.54384200 | -4.30062300 | 3.34914000  |
| <b>L<sub>3</sub>-TS18</b> |             |             |             | C | -3.02394200 | -2.62252200 | 2.11353300  |
| Cu                        | 0.68330700  | -0.02532000 | 0.91547600  | H | -3.96733300 | -2.11586600 | 2.27983800  |
| N                         | -2.31049800 | -0.76769100 | 0.65797700  | C | -5.62783200 | -0.86066300 | -0.91307500 |
| N                         | 2.30742000  | -0.70661500 | -1.70204100 | C | -7.01647100 | -1.08052800 | -0.31216200 |
| N                         | 2.13488100  | 1.42352600  | -1.45627400 | H | -7.20428000 | -2.15350200 | -0.21145900 |
| O                         | -4.64501400 | -1.37181500 | 0.02011500  | H | -7.79502900 | -0.66022200 | -0.95770200 |
| O                         | -3.77625100 | 0.60160100  | -0.78224700 | H | -7.10358100 | -0.62997200 | 0.67813700  |
| B                         | -3.54591100 | -0.52833400 | -0.01320200 | C | -5.49010800 | -1.67321300 | -2.20790000 |
| C                         | 1.72553400  | 0.23977300  | -0.89439600 | H | -4.50295200 | -1.54098800 | -2.65757800 |
| C                         | 3.05478500  | -0.12428800 | -2.72296500 | H | -6.24886600 | -1.39437300 | -2.94571400 |
| C                         | 2.95075100  | 1.21420000  | -2.56585100 | H | -5.61159700 | -2.73422300 | -1.97260000 |
| C                         | 1.72109200  | 2.76216400  | -1.08559800 | C | -5.19604900 | 0.65226700  | -1.06802300 |
| C                         | 2.47631200  | 3.48163000  | -0.13574600 | C | -5.39047800 | 1.23886900  | -2.46569900 |
| C                         | 2.07981400  | 4.79674100  | 0.14149900  | H | -5.03879300 | 2.27442500  | -2.48056600 |
| H                         | 2.63646200  | 5.37518900  | 0.87107100  | H | -6.44920200 | 1.23773200  | -2.74630800 |
| C                         | 0.99606500  | 5.37868400  | -0.50868400 | H | -4.82998500 | 0.68138300  | -3.21853700 |
| C                         | 0.28346200  | 4.65485500  | -1.45943200 | C | -5.83201700 | 1.57747700  | -0.02097300 |
|                           |             |             |             | H | -5.69696800 | 1.18603500  | 0.99050300  |
|                           |             |             |             | H | -6.90171800 | 1.72118200  | -0.20218100 |

|    |             |             |             |
|----|-------------|-------------|-------------|
| H  | -5.33842200 | 2.55187700  | -0.06482800 |
| C  | -1.80085200 | 1.47089200  | 1.62367800  |
| C  | -1.19102600 | 2.74025400  | 1.52324600  |
| H  | -0.40274200 | 2.89076300  | 0.79248700  |
| C  | -1.57378700 | 3.80103300  | 2.33774700  |
| H  | -1.08182200 | 4.76370300  | 2.22271900  |
| C  | -2.58521100 | 3.63784100  | 3.29162100  |
| H  | -2.88482600 | 4.46590100  | 3.92771000  |
| C  | -3.20203200 | 2.39337100  | 3.40693500  |
| H  | -3.99186700 | 2.24365200  | 4.13934400  |
| C  | -2.81762400 | 1.32797400  | 2.58784900  |
| H  | -3.32135800 | 0.37241600  | 2.69059300  |
| H  | 4.28508400  | -1.31703900 | -0.31262300 |
| H  | -0.04143400 | -0.82954300 | -2.49562500 |
| H  | 0.10324800  | 1.53509900  | -2.79834700 |
| H  | 3.67328400  | 1.81873300  | 0.46046100  |
| C  | -0.26421200 | -0.34737700 | 3.61189800  |
| H  | -1.23797100 | -0.72624200 | 3.34295000  |
| H  | -0.13027200 | 0.72789800  | 3.58399500  |
| Br | 2.82611500  | -0.34310400 | 2.10117500  |
| C  | 0.68744500  | -1.16685900 | 4.17640700  |
| H  | 0.51527300  | -2.24041900 | 4.18969000  |
| C  | 1.95223700  | -0.68507300 | 4.51391300  |
| H  | 2.11106500  | 0.37585200  | 4.66390600  |
| H  | 2.71968800  | -1.34420000 | 4.90474700  |
| H  | 3.36724600  | 2.03223900  | -3.13033800 |
| H  | 3.57629600  | -0.71469100 | -3.45788600 |
| C  | 3.82559600  | 3.24955300  | 2.02098300  |
| H  | 3.99340200  | 4.31877700  | 2.19254000  |
| H  | 2.92089800  | 2.94860600  | 2.55510300  |
| H  | 4.66821700  | 2.70999700  | 2.46381200  |
| C  | 4.99147700  | 3.37222300  | -0.22506500 |
| H  | 5.88612000  | 2.93599500  | 0.23218700  |
| H  | 4.97279500  | 3.07183400  | -1.27764900 |
| H  | 5.09228100  | 4.46306500  | -0.19135400 |
| C  | 5.56544300  | -2.48765200 | -1.59232300 |
| H  | 5.76790700  | -3.53666900 | -1.83643800 |
| H  | 5.30861400  | -1.97508900 | -2.52410700 |
| H  | 6.49319400  | -2.04587200 | -1.21288000 |
| C  | 4.89738200  | -3.04082000 | 0.77741000  |
| H  | 4.10988500  | -2.99600700 | 1.53203700  |
| H  | 5.18950000  | -4.08628900 | 0.62877500  |
| H  | 5.77083400  | -2.51349900 | 1.17449000  |
| C  | -1.52145900 | -2.33512400 | -2.76216400 |

|   |             |             |             |
|---|-------------|-------------|-------------|
| H | -1.69889700 | -3.27078700 | -3.30356000 |
| H | -1.77090500 | -2.49339100 | -1.71047400 |
| H | -2.21473100 | -1.59183500 | -3.16819500 |
| C | 0.26096400  | -1.70178700 | -4.43636500 |
| H | 1.25429800  | -1.27223600 | -4.59473900 |
| H | 0.23749000  | -2.68343500 | -4.92289100 |
| H | -0.46833200 | -1.05849700 | -4.94112400 |
| C | -1.66840100 | 2.72540000  | -2.72872700 |
| H | -2.15866000 | 2.11904400  | -3.49768100 |
| H | -2.02739700 | 2.37878500  | -1.75719600 |
| H | -2.00428900 | 3.75842200  | -2.87104700 |
| C | 0.30947100  | 3.08721400  | -4.26349500 |
| H | 0.08789000  | 4.15218900  | -4.39386800 |
| H | 1.38421500  | 2.94964900  | -4.41638900 |
| H | -0.21613800 | 2.53561600  | -5.05049100 |
| H | 1.66313000  | -5.97723800 | -1.62821200 |
| H | 0.71042800  | 6.40149800  | -0.27923000 |

### L<sub>3</sub>-19

|    |             |             |             |
|----|-------------|-------------|-------------|
| Cu | 0.65614700  | 0.01636000  | 1.13355500  |
| N  | -2.22298200 | -1.10995100 | 0.60553200  |
| N  | 2.67027100  | -0.33171900 | -1.28944800 |
| N  | 1.71615800  | 1.59324400  | -1.43885600 |
| O  | -4.50892500 | -1.92420400 | 0.03671100  |
| O  | -4.01235100 | 0.28115100  | -0.38554900 |
| B  | -3.55263900 | -0.92835600 | 0.10520200  |
| C  | 1.63250900  | 0.40050700  | -0.75669700 |
| C  | 3.38761300  | 0.40053400  | -2.23126300 |
| C  | 2.78867300  | 1.60664100  | -2.32566600 |
| C  | 0.78075300  | 2.70326500  | -1.43663400 |
| C  | 1.11746000  | 3.89199400  | -0.75487800 |
| C  | 0.21944900  | 4.96564300  | -0.84859000 |
| H  | 0.44952000  | 5.89027600  | -0.32971300 |
| C  | -0.95213700 | 4.87015000  | -1.59002200 |
| C  | -1.24241500 | 3.69895100  | -2.28429800 |
| H  | -2.14808100 | 3.64270700  | -2.87776600 |
| C  | -0.37922100 | 2.59843300  | -2.24220800 |
| C  | -0.65826300 | 1.38188600  | -3.12399600 |
| C  | 2.42047000  | 4.07415900  | 0.01639700  |
| C  | 2.97872100  | -1.73795500 | -1.09659200 |
| C  | 3.99635100  | -2.10534300 | -0.19096800 |
| C  | 4.81542700  | -1.08336500 | 0.58977500  |
| C  | 4.31335000  | -3.46791600 | -0.09350800 |

|   |             |             |             |    |             |             |             |
|---|-------------|-------------|-------------|----|-------------|-------------|-------------|
| H | 5.08436400  | -3.78070800 | 0.60248300  | C  | -3.20525200 | 1.78357700  | 3.61089300  |
| C | 3.67823300  | -4.41902700 | -0.88346100 | H  | -3.84277700 | 1.50518500  | 4.44593400  |
| C | 2.71514700  | -4.02429500 | -1.80860100 | C  | -2.74615500 | 0.79732800  | 2.73877200  |
| H | 2.24868800  | -4.76999000 | -2.44378900 | H  | -3.04458800 | -0.23410400 | 2.89398100  |
| C | 2.34872500  | -2.67971100 | -1.94594200 | H  | 4.25320100  | -0.14821200 | 0.62452300  |
| C | 1.38101300  | -2.27489200 | -3.05882000 | H  | 0.96696600  | -1.29558800 | -2.80437600 |
| C | -1.38188100 | 0.09077500  | 0.71250900  | H  | -0.18042800 | 0.51512600  | -2.65901600 |
| H | -1.18029500 | 0.52223100  | -0.26947500 | H  | 2.84854700  | 3.08653000  | 0.19953300  |
| C | -1.75465400 | -2.43253400 | 0.87389700  | C  | 0.08069100  | -0.74811000 | 2.94200700  |
| C | -0.54017000 | -2.90039600 | 0.35705400  | H  | -0.94805700 | -1.06839800 | 2.84295200  |
| H | 0.07032700  | -2.23872100 | -0.24675900 | H  | 0.18162200  | 0.15459000  | 3.53957400  |
| C | -0.10924400 | -4.20355500 | 0.61821100  | Br | 2.52460100  | 1.21813600  | 2.22238900  |
| H | 0.83872200  | -4.53801300 | 0.20901900  | C  | 0.96758200  | -1.85513100 | 3.30956300  |
| C | -0.89005500 | -5.06646100 | 1.38800600  | H  | 0.72899900  | -2.82430800 | 2.87710200  |
| H | -0.55566200 | -6.08043500 | 1.58709600  | C  | 1.98914500  | -1.76935800 | 4.18155600  |
| C | -2.10499800 | -4.60822300 | 1.90160900  | H  | 2.28129000  | -0.82120900 | 4.62157700  |
| H | -2.72223400 | -5.26349500 | 2.51019800  | H  | 2.55610700  | -2.64980200 | 4.47147400  |
| C | -2.53162900 | -3.30463500 | 1.65432900  | H  | 4.24313900  | -0.01096900 | -2.74021000 |
| H | -3.47418800 | -2.95581100 | 2.05931200  | H  | 3.01084300  | 2.46685900  | -2.93486200 |
| C | -5.61993700 | -1.40378800 | -0.73997500 | H  | -1.63555300 | 5.71326000  | -1.63919900 |
| C | -6.91453200 | -1.98664700 | -0.17625600 | H  | 3.94649900  | -5.46810500 | -0.79349300 |
| H | -6.91895400 | -3.07150100 | -0.31591000 | C  | 2.20225400  | 4.71300400  | 1.39966000  |
| H | -7.78697200 | -1.57545900 | -0.69509000 | H  | 3.14552900  | 4.71397500  | 1.95420000  |
| H | -7.01655600 | -1.78438200 | 0.89147600  | H  | 1.86156600  | 5.75255900  | 1.32649500  |
| C | -5.41550300 | -1.87363300 | -2.18656300 | H  | 1.47890800  | 4.14122500  | 1.98448500  |
| H | -4.49401200 | -1.46358200 | -2.60940900 | C  | 3.42744900  | 4.90637000  | -0.80546600 |
| H | -6.25221400 | -1.58383700 | -2.82949400 | H  | 3.04399200  | 5.91456300  | -1.00019000 |
| H | -5.33499200 | -2.96405000 | -2.19569300 | H  | 4.36998500  | 5.00601500  | -0.25669100 |
| C | -5.44945400 | 0.15389800  | -0.56063400 | H  | 3.65271200  | 4.44667300  | -1.77340300 |
| C | -5.87254500 | 0.99790200  | -1.76095600 | C  | 5.05923400  | -1.49457900 | 2.05080300  |
| H | -5.67336600 | 2.05326200  | -1.55356600 | H  | 5.72004700  | -2.36567000 | 2.13359200  |
| H | -6.94502800 | 0.88808900  | -1.95356500 | H  | 5.53511400  | -0.66746600 | 2.58594200  |
| H | -5.32668000 | 0.72185400  | -2.66465100 | H  | 4.11765600  | -1.71544500 | 2.55792000  |
| C | -6.10719600 | 0.69207500  | 0.71724100  | C  | 6.15912600  | -0.81933800 | -0.12346600 |
| H | -5.82753300 | 0.09482600  | 1.58908100  | H  | 6.76685700  | -1.73026200 | -0.17502600 |
| H | -7.19838200 | 0.70134900  | 0.63610100  | H  | 6.01944900  | -0.45592800 | -1.14675400 |
| H | -5.76193800 | 1.71453300  | 0.89012100  | H  | 6.73199700  | -0.06260800 | 0.42301000  |
| C | -1.91964600 | 1.12130400  | 1.64441800  | C  | -2.15255600 | 1.04848300  | -3.26895200 |
| C | -1.58281600 | 2.47643000  | 1.45828200  | H  | -2.26129800 | 0.09208100  | -3.79243600 |
| H | -0.95957900 | 2.75806900  | 0.61841800  | H  | -2.65365600 | 0.96906900  | -2.30143100 |
| C | -2.04003800 | 3.45963000  | 2.33068800  | H  | -2.68007300 | 1.79882800  | -3.86850000 |
| H | -1.76422500 | 4.49604500  | 2.15712800  | C  | -0.02658000 | 1.57678800  | -4.52028400 |
| C | -2.85264100 | 3.12033300  | 3.41601400  | H  | -0.46921500 | 2.44335700  | -5.02397600 |
| H | -3.21098900 | 3.88781200  | 4.09611400  | H  | 1.05348800  | 1.73488000  | -4.46339500 |

|   |             |             |             |   |             |             |             |
|---|-------------|-------------|-------------|---|-------------|-------------|-------------|
| H | -0.20505900 | 0.69574800  | -5.14677900 | C | 1.94663700  | -1.87199000 | -1.72307200 |
| C | 0.19416200  | -3.23933100 | -3.23744800 | C | 0.78044000  | -2.60602700 | -1.46681000 |
| H | 0.51301400  | -4.21050600 | -3.63097300 | H | 0.07039300  | -2.22466300 | -0.73981500 |
| H | -0.34068100 | -3.41224500 | -2.30113000 | C | 0.53924100  | -3.80750100 | -2.13566500 |
| H | -0.51261700 | -2.82005700 | -3.96149600 | H | -0.36562000 | -4.36619000 | -1.92156300 |
| C | 2.13587100  | -2.12931900 | -4.39885900 | C | 1.46027700  | -4.30510700 | -3.05903600 |
| H | 1.44844700  | -1.81570500 | -5.19220400 | H | 1.27037000  | -5.24363100 | -3.57160000 |
| H | 2.93782300  | -1.38912000 | -4.33808500 | C | 2.62948800  | -3.58697000 | -3.30935400 |
| H | 2.58108400  | -3.08495600 | -4.69699900 | H | 3.35965900  | -3.96132700 | -4.02145100 |

### L<sub>3</sub>-TS20

|    |             |             |             |   |             |             |             |
|----|-------------|-------------|-------------|---|-------------|-------------|-------------|
| Cu | -0.75665000 | 0.44772900  | -0.83368900 | C | 5.53536900  | -1.04648300 | 0.54392400  |
| N  | 2.23410200  | -0.66249500 | -1.01169500 | C | 6.87732500  | -1.47040100 | -0.05076300 |
| N  | -3.11288300 | -0.44652700 | 0.96629000  | H | 6.94084300  | -2.56227400 | -0.07252100 |
| N  | -1.34304700 | -0.13832600 | 2.15173000  | H | 7.70895300  | -1.09495900 | 0.55490500  |
| O  | 4.48056900  | -1.49980700 | -0.34673500 | H | 6.99793200  | -1.10535800 | -1.07205100 |
| O  | 3.85887500  | 0.60487000  | 0.34977500  | C | 5.31457400  | -1.74037200 | 1.89345200  |
| B  | 3.49605200  | -0.53028100 | -0.34441800 | H | 4.35745200  | -1.44792100 | 2.33144700  |
| C  | -1.76421800 | -0.18089100 | 0.84419400  | H | 6.11252100  | -1.50509100 | 2.60460100  |
| C  | -3.49663700 | -0.55909600 | 2.29907300  | H | 5.30172000  | -2.82254400 | 1.73572700  |
| C  | -2.38826000 | -0.36238500 | 3.04348400  | C | 5.28739600  | 0.51344100  | 0.59344300  |
| C  | -0.00579200 | 0.03924300  | 2.68429700  | C | 5.59674600  | 1.17663900  | 1.93352600  |
| C  | 0.42680100  | 1.33903900  | 3.02692600  | H | 5.37531400  | 2.24601100  | 1.87192200  |
| C  | 1.63991300  | 1.45023200  | 3.71893800  | H | 6.65582600  | 1.06416100  | 2.18889900  |
| H  | 2.00118000  | 2.43441100  | 3.99618200  | H | 4.99251700  | 0.75428000  | 2.73725700  |
| C  | 2.37683600  | 0.32546700  | 4.07469200  | C | 5.98427400  | 1.27610900  | -0.54238300 |
| C  | 1.93100300  | -0.94347800 | 3.71746000  | H | 5.77800300  | 0.82146500  | -1.51502300 |
| H  | 2.51085100  | -1.81501500 | 4.00376000  | H | 7.06836800  | 1.31493900  | -0.39762600 |
| C  | 0.73476800  | -1.11787200 | 3.01051800  | H | 5.59944500  | 2.29877600  | -0.56844400 |
| C  | 0.25495100  | -2.52988000 | 2.68083100  | C | 2.04458500  | 1.63932300  | -1.92815700 |
| C  | -0.39943300 | 2.58642600  | 2.72738800  | C | 1.86117000  | 2.99147900  | -1.58729500 |
| C  | -4.10577800 | -0.65849100 | -0.07137800 | H | 1.22385300  | 3.24478200  | -0.74887300 |
| C  | -4.97603600 | 0.40005000  | -0.41349400 | C | 2.45406900  | 4.00421700  | -2.33814300 |
| C  | -4.89870200 | 1.78638300  | 0.22276000  | H | 2.29727300  | 5.04071600  | -2.05290300 |
| C  | -5.98835000 | 0.12403500  | -1.34378100 | C | 3.24121900  | 3.69466800  | -3.44974600 |
| H  | -6.66831300 | 0.91735400  | -1.63387500 | H | 3.70386900  | 4.48622800  | -4.03264400 |
| C  | -6.14232400 | -1.14155300 | -1.89783200 | C | 3.42666100  | 2.35710000  | -3.80570700 |
| C  | -5.28767500 | -2.17415600 | -1.52215300 | H | 4.03414600  | 2.10156100  | -4.66990200 |
| H  | -5.43116400 | -3.16176700 | -1.94691600 | C | 2.83505100  | 1.34219000  | -3.05477500 |
| C  | -4.25985400 | -1.96189600 | -0.59509800 | H | 2.99662300  | 0.30817400  | -3.33973700 |
| C  | -3.40608900 | -3.13898900 | -0.12719600 | H | -3.87935600 | 1.93385500  | 0.58779500  |
| C  | 1.43271000  | 0.56634200  | -1.09325000 | H | -2.44671600 | -2.74081300 | 0.21693700  |
| H  | 1.22473600  | 0.94256900  | -0.08657700 | H | -0.54118600 | -2.44709200 | 1.93488900  |
|    |             |             |             | H | -1.04188700 | 2.37627200  | 1.86837500  |





|                         |             |             |             |    |             |             |             |
|-------------------------|-------------|-------------|-------------|----|-------------|-------------|-------------|
| H                       | -1.79373600 | 4.30761500  | 0.33173500  | C  | -1.96173200 | 3.85327000  | -0.13063900 |
| C                       | 2.34843300  | 3.37380900  | 0.47439600  | C  | -3.10045600 | 3.38549400  | 0.51701200  |
| H                       | 1.85493500  | 2.79839900  | 1.26315100  | C  | -3.02159400 | 2.28963400  | 1.37253000  |
| H                       | 3.35201600  | 3.63482700  | 0.82695200  | C  | -1.80569000 | 1.63630700  | 1.60464200  |
| H                       | 1.79343900  | 4.30746200  | 0.33221200  | C  | -0.66923400 | 2.13538200  | 0.93311400  |
| C                       | 3.05795400  | 3.40855400  | -1.96879900 | H  | -2.03776500 | 4.70425700  | -0.80057200 |
| H                       | 4.09622300  | 3.66030700  | -1.72801600 | H  | -3.92143900 | 1.92537400  | 1.85455800  |
| H                       | 3.05989400  | 2.86552000  | -2.91977600 | Cu | 0.24936100  | -0.41138900 | -1.04891900 |
| H                       | 2.51479100  | 4.34819500  | -2.11554600 | H  | 3.49260700  | 0.96105600  | 2.60016300  |
| C                       | 3.05964000  | -3.39844700 | -1.98486300 | H  | 1.30885200  | 2.66814800  | 2.82870600  |
| H                       | 3.06403200  | -2.85138500 | -2.93352000 | C  | 2.00428300  | -2.51197200 | 2.12842900  |
| H                       | 4.09718600  | -3.65206700 | -1.74293800 | H  | 1.43522100  | -1.60541200 | 2.35331000  |
| H                       | 2.51611100  | -4.33705400 | -2.13677100 | C  | 4.31335600  | 0.82898700  | -1.05126000 |
| C                       | 2.34538200  | -3.37336300 | 0.45706800  | H  | 3.56272200  | 1.48058400  | -0.59493000 |
| H                       | 3.34824100  | -3.63577200 | 0.81064700  | C  | -1.73343400 | 0.45950700  | 2.57461500  |
| H                       | 1.85030500  | -2.80106700 | 1.24709700  | H  | -0.85501000 | -0.13803400 | 2.30805200  |
| H                       | 1.79063900  | -4.30640700 | 0.30997800  | C  | 0.50750300  | 3.77139600  | -0.67852100 |
| C                       | -2.34527500 | -3.37332000 | 0.45739700  | H  | 1.36550600  | 3.14587900  | -0.41511300 |
| H                       | -1.85031300 | -2.80093900 | 1.24743700  | O  | -4.33881500 | -1.43826800 | -0.75402900 |
| H                       | -3.34814200 | -3.63581900 | 0.81090000  | C  | -5.67558400 | -1.61336600 | -0.45189000 |
| H                       | -1.79042700 | -4.30631600 | 0.31041800  | C  | -5.83353800 | -2.68652000 | 0.65230500  |
| C                       | -3.05947500 | -3.39862600 | -1.98454000 | H  | -5.30201500 | -2.37558200 | 1.55838800  |
| H                       | -4.09704000 | -3.65221400 | -1.74266000 | H  | -6.88336000 | -2.86943900 | 0.91559500  |
| H                       | -3.06378500 | -2.85167900 | -2.93326200 | H  | -5.39285900 | -3.63047800 | 0.31282300  |
| H                       | -2.51593900 | -4.33725800 | -2.13629100 | C  | -6.28600000 | -0.27985400 | 0.04388700  |
| H                       | -6.15293300 | -0.00032900 | 0.24393300  | H  | -6.16710900 | 0.48836700  | -0.72838700 |
| H                       | 6.15293300  | -0.00021200 | 0.24392000  | H  | -7.35324600 | -0.36736700 | 0.28468600  |
| <b>L<sub>3</sub>-22</b> |             |             |             | H  | -5.75898800 | 0.06104900  | 0.94194300  |
| C                       | 1.08801500  | 0.44628700  | 0.42195800  | C  | -6.44930100 | -2.07595600 | -1.71010400 |
| C                       | 1.50873000  | 1.85621900  | 2.14867500  | H  | -6.02706900 | -3.01862300 | -2.07704400 |
| C                       | 2.57649100  | 1.02487100  | 2.03554100  | H  | -7.51957100 | -2.22989400 | -1.51965100 |
| N                       | 2.30268300  | 0.16878400  | 0.97606600  | H  | -6.34641500 | -1.32658000 | -2.50360200 |
| N                       | 0.60805700  | 1.48857800  | 1.15787900  | Li | -2.94894200 | -1.39927500 | -1.64445700 |
| C                       | 4.16454900  | -0.56410700 | -0.44753600 | Br | -0.78486800 | -1.41372200 | -2.81275000 |
| C                       | 3.19266000  | -0.87821400 | 0.52344700  | H  | -4.05763700 | 3.87017400  | 0.34890000  |
| C                       | 3.05614000  | -2.16638000 | 1.07837800  | H  | 5.57388300  | -3.66364600 | -0.67299200 |
| C                       | 3.93513200  | -3.15754100 | 0.62436600  | C  | -1.53398000 | 0.96065600  | 4.02170600  |
| C                       | 4.90428700  | -2.87820200 | -0.33469800 | H  | -2.38280900 | 1.57750100  | 4.33631400  |
| C                       | 5.01604400  | -1.59517200 | -0.86268100 | H  | -1.46084500 | 0.11317500  | 4.71175800  |
| H                       | 3.85502700  | -4.16258800 | 1.02688300  | H  | -0.62578000 | 1.56233800  | 4.12983900  |
| H                       | 5.77381200  | -1.38868000 | -1.61219700 | C  | -2.95844200 | -0.46972900 | 2.49452600  |
| C                       | -0.71785200 | 3.23789600  | 0.05796600  | H  | -3.84861600 | 0.00395200  | 2.92360300  |
|                         |             |             |             | H  | -3.20357400 | -0.76796700 | 1.46933700  |
|                         |             |             |             | H  | -2.76777800 | -1.37406400 | 3.08241600  |

|                           |             |             |             |    |             |             |             |
|---------------------------|-------------|-------------|-------------|----|-------------|-------------|-------------|
| C                         | 1.00356100  | -3.55774700 | 1.59903600  | C  | -2.82607100 | 0.88672200  | -1.70075100 |
| H                         | 0.51265100  | -3.21132500 | 0.68453200  | C  | -2.40578800 | -0.37670600 | -1.23956200 |
| H                         | 1.49834000  | -4.50838100 | 1.37365900  | H  | -5.27763400 | -1.51892300 | 0.15333600  |
| H                         | 0.22884000  | -3.75446000 | 2.34742400  | H  | -4.51600300 | 2.21253300  | -1.80335600 |
| C                         | 2.65520600  | -2.97897500 | 3.44509400  | Cu | -0.21000500 | 0.12854400  | 1.14596100  |
| H                         | 3.34061500  | -2.22371200 | 3.84350500  | H  | 1.39921100  | -2.25579700 | -3.07927600 |
| H                         | 1.88661400  | -3.17275300 | 4.20050600  | H  | -1.30686300 | -1.72121200 | -3.41421000 |
| H                         | 3.22401800  | -3.90444400 | 3.30673600  | C  | 3.13895000  | 0.62696100  | -2.22528300 |
| C                         | 5.69498900  | 1.43580700  | -0.73724800 | H  | 2.05879700  | 0.79886100  | -2.26831900 |
| H                         | 5.87771100  | 1.47969200  | 0.34138500  | C  | 1.59763600  | -3.29809900 | 0.75091700  |
| H                         | 6.50335900  | 0.85012500  | -1.18742900 | H  | 0.63432000  | -2.99716000 | 0.33180200  |
| H                         | 5.76278000  | 2.45402700  | -1.13468200 | C  | -1.91231700 | 1.83776500  | -2.46654900 |
| C                         | 4.04116400  | 0.81706100  | -2.56828600 | H  | -0.89644800 | 1.43319000  | -2.43335200 |
| H                         | 4.77137300  | 0.20018500  | -3.10264400 | C  | -2.83129500 | -2.65639300 | -0.10259200 |
| H                         | 3.04460400  | 0.42272700  | -2.78954900 | H  | -1.75293800 | -2.74546000 | -0.26037600 |
| H                         | 4.10440400  | 1.83264700  | -2.97333700 | O  | -0.13143300 | 3.19519200  | 1.29721000  |
| C                         | 0.33214900  | 3.67830700  | -2.20692100 | C  | 0.98398200  | 4.02351500  | 1.20863900  |
| H                         | 0.12209000  | 2.65119500  | -2.52072000 | C  | 1.21247300  | 4.46912200  | -0.25364800 |
| H                         | -0.49222900 | 4.30879500  | -2.55604800 | H  | 0.35122400  | 5.04329900  | -0.61044900 |
| H                         | 1.24322300  | 4.01272200  | -2.71501600 | H  | 2.10932100  | 5.09164600  | -0.36451500 |
| C                         | 0.84317600  | 5.21170300  | -0.24396500 | H  | 1.31943900  | 3.59054900  | -0.89855000 |
| H                         | 0.03224300  | 5.90410500  | -0.49308700 | C  | 0.77252800  | 5.28664100  | 2.07844700  |
| H                         | 1.01337800  | 5.27519000  | 0.83584400  | H  | 0.63850100  | 4.99939500  | 3.12936500  |
| H                         | 1.74775000  | 5.56286900  | -0.75186300 | H  | 1.61656000  | 5.98648000  | 2.02639500  |
| <b>L<sub>3</sub>-TS23</b> |             |             |             | H  | -0.13126600 | 5.81266200  | 1.75150200  |
| C                         | -0.00317900 | -0.59761200 | -0.60939400 | C  | 2.23998000  | 3.27520000  | 1.71457000  |
| C                         | -0.62768200 | -1.48041800 | -2.61247700 | H  | 2.38303200  | 2.35713400  | 1.13330900  |
| C                         | 0.69416400  | -1.73726100 | -2.45091100 | H  | 3.15380300  | 3.87961800  | 1.64345500  |
| N                         | 1.06394600  | -1.18780100 | -1.22718500 | H  | 2.10607400  | 2.98236800  | 2.76267400  |
| N                         | -1.03836100 | -0.78655400 | -1.48151900 | Li | -1.02275600 | 2.47688500  | 2.54318800  |
| C                         | 2.65494000  | -2.30459200 | 0.27757300  | Br | -0.95528600 | 0.22470300  | 3.36135000  |
| C                         | 2.39902300  | -1.29971000 | -0.67826600 | C  | 1.44029200  | -3.29656200 | 2.28299800  |
| C                         | 3.40276400  | -0.42856700 | -1.15396500 | H  | 0.64033000  | -3.98387000 | 2.57816800  |
| C                         | 4.69176300  | -0.58565800 | -0.63057700 | H  | 2.35666000  | -3.62378300 | 2.78558600  |
| C                         | 4.96988400  | -1.55868200 | 0.32507000  | H  | 1.18376400  | -2.30117500 | 2.65661100  |
| C                         | 3.96182900  | -2.40634700 | 0.77153400  | C  | 1.90556800  | -4.71504500 | 0.22514800  |
| H                         | 5.48768400  | 0.06752700  | -0.97225200 | H  | 1.97057600  | -4.73298500 | -0.86780500 |
| H                         | 4.19087900  | -3.16635800 | 1.51209700  | H  | 2.85610100  | -5.08930100 | 0.62056500  |
| C                         | -3.26764800 | -1.27120400 | -0.57059000 | H  | 1.11924800  | -5.41398500 | 0.52987500  |
| C                         | -4.58832000 | -0.85661100 | -0.36094200 | C  | -3.50906100 | -3.75897800 | -0.94142900 |
| C                         | -5.03073100 | 0.38833400  | -0.79863700 | H  | -3.28962200 | -3.64583100 | -2.00829100 |
| C                         | -4.15908700 | 1.24590300  | -1.46262700 | H  | -3.15988200 | -4.74825000 | -0.62635600 |
|                           |             |             |             | H  | -4.59767300 | -3.73561800 | -0.82230900 |
|                           |             |             |             | C  | -3.08700600 | -2.86818400 | 1.40184600  |

|                                     |             |             |             |    |             |             |             |
|-------------------------------------|-------------|-------------|-------------|----|-------------|-------------|-------------|
| H                                   | -4.15696500 | -2.85357800 | 1.63596300  | H  | -7.42106300 | 3.41132700  | 0.28004400  |
| H                                   | -2.69823000 | -3.84370300 | 1.71412400  | H  | -7.10430100 | 1.66322900  | 0.25421200  |
| H                                   | -2.59891700 | -2.09532800 | 2.00221500  | C  | -4.94611600 | 4.14150100  | -0.85771700 |
| C                                   | -1.86127500 | 3.23765900  | -1.82780000 | H  | -3.87679700 | 4.35318800  | -0.76836200 |
| H                                   | -1.47118300 | 3.20138000  | -0.80502900 | H  | -5.50355700 | 5.02657800  | -0.53586800 |
| H                                   | -1.19897500 | 3.88410100  | -2.41356400 | H  | -5.16953200 | 3.96089800  | -1.91310700 |
| H                                   | -2.84933800 | 3.71145500  | -1.81621400 | C  | -4.79653100 | 2.93153700  | 1.43591500  |
| C                                   | -2.33104500 | 1.91103000  | -3.94996300 | C  | -4.69272500 | 4.32402300  | 2.05636600  |
| H                                   | -2.32359600 | 0.92295600  | -4.42337500 | H  | -4.28803700 | 4.24411700  | 3.06957800  |
| H                                   | -3.34077800 | 2.32204400  | -4.05783800 | H  | -5.67792200 | 4.79804100  | 2.12205400  |
| H                                   | -1.64596200 | 2.55898200  | -4.50695000 | H  | -4.03038700 | 4.97272600  | 1.48003900  |
| C                                   | 3.59606200  | 0.12876600  | -3.61320300 | C  | -5.56093000 | 1.98986700  | 2.37769000  |
| H                                   | 3.38034400  | 0.88111300  | -4.37934800 | H  | -5.64219700 | 0.98610800  | 1.95150300  |
| H                                   | 4.67516400  | -0.06011500 | -3.62119400 | H  | -6.56756300 | 2.35996200  | 2.59602300  |
| H                                   | 3.09571000  | -0.79976000 | -3.90426000 | H  | -5.00992000 | 1.90889100  | 3.31852600  |
| C                                   | 3.80095600  | 1.97999800  | -1.90765600 | C  | -1.62922800 | -0.53347200 | 1.89596800  |
| H                                   | 4.89295300  | 1.92468300  | -1.97213400 | C  | -0.85995700 | -0.62947300 | 3.07579900  |
| H                                   | 3.47251000  | 2.73266600  | -2.63143200 | H  | -0.06266100 | 0.09198400  | 3.24378000  |
| H                                   | 3.53509600  | 2.33457000  | -0.90961800 | C  | -1.09142200 | -1.62264400 | 4.02214600  |
| H                                   | -6.05958500 | 0.69006300  | -0.62361100 | H  | -0.47732800 | -1.66012300 | 4.91892900  |
| H                                   | 5.97663600  | -1.65708300 | 0.72096100  | C  | -2.10357600 | -2.56968600 | 3.82549900  |
| <b>L<sub>3</sub>-17<sub>2</sub></b> |             |             |             | H  | -2.28362600 | -3.34799700 | 4.56195300  |
| N                                   | -2.37016500 | 0.72317900  | -0.15349300 | C  | -2.88200700 | -2.48767200 | 2.67164200  |
| O                                   | -4.60517500 | 1.77709300  | -0.60871000 | H  | -3.68130300 | -3.20577900 | 2.50160800  |
| O                                   | -3.46246100 | 2.39314400  | 1.28776100  | C  | -2.65156600 | -1.48411700 | 1.72418400  |
| B                                   | -3.45481200 | 1.60054700  | 0.14825300  | H  | -3.28022400 | -1.43140000 | 0.84119500  |
| C                                   | -1.33311200 | 0.56276100  | 0.90518000  | C  | -1.85501700 | -4.85002400 | 0.03122000  |
| H                                   | -1.34986600 | 1.49919700  | 1.47357400  | C  | -3.00527300 | -5.78817500 | 0.09609000  |
| C                                   | -2.27440500 | -0.03146700 | -1.34562000 | C  | -4.17983100 | -5.54677000 | -0.49075700 |
| C                                   | -1.50349700 | -1.21137200 | -1.39629300 | H  | -5.01364700 | -6.23584700 | -0.39638200 |
| H                                   | -0.98713000 | -1.54851900 | -0.50656100 | H  | -4.34705500 | -4.65009300 | -1.08215000 |
| C                                   | -1.41999300 | -1.97027500 | -2.56666400 | H  | -2.85742900 | -6.69760100 | 0.67550900  |
| H                                   | -0.83622800 | -2.88785400 | -2.55743800 | H  | -1.44647200 | -4.60020600 | 1.00933200  |
| C                                   | -2.09148900 | -1.57584800 | -3.72405300 | H  | -2.07526100 | -3.94194400 | -0.52644000 |
| H                                   | -2.03012200 | -2.17041600 | -4.63086900 | Cu | 0.53926400  | 0.60354200  | 0.27797200  |
| C                                   | -2.84497200 | -0.40052100 | -3.68895000 | N  | 3.03027600  | 1.29240800  | -1.24958800 |
| H                                   | -3.36960500 | -0.06431200 | -4.58006300 | N  | 3.44823300  | 0.66576800  | 0.76598500  |
| C                                   | -2.93635300 | 0.36246000  | -2.52700000 | C  | 2.41582700  | 0.83952800  | -0.11454400 |
| H                                   | -3.53301500 | 1.26450100  | -2.52590300 | C  | 4.40607500  | 1.39978400  | -1.07495200 |
| C                                   | -5.33373200 | 2.89635200  | -0.04680100 | C  | 4.67015400  | 1.00034300  | 0.19360500  |
| C                                   | -6.82902900 | 2.62009300  | -0.19227400 | C  | 3.31038200  | 0.23239600  | 2.13886100  |
| H                                   | -7.09538900 | 2.58589700  | -1.25286400 | C  | 3.27810600  | -1.14787700 | 2.41953200  |
|                                     |             |             |             | C  | 3.19408500  | -1.52961100 | 3.76469900  |
|                                     |             |             |             | H  | 3.16288600  | -2.58554600 | 4.01446200  |

|    |             |             |             |                                       |             |             |             |
|----|-------------|-------------|-------------|---------------------------------------|-------------|-------------|-------------|
| C  | 3.14251600  | -0.58254500 | 4.78267300  | H                                     | 1.80648300  | 3.30902900  | 4.38348300  |
| C  | 3.16557000  | 0.77504500  | 4.47482400  | C                                     | 4.47947700  | 3.41033200  | 3.48022000  |
| H  | 3.11449100  | 1.50642500  | 5.27583100  | H                                     | 4.46511300  | 3.33801900  | 4.57290500  |
| C  | 3.24981600  | 1.21530900  | 3.14848600  | H                                     | 5.41859200  | 2.96862000  | 3.13106800  |
| C  | 3.25831000  | 2.71213400  | 2.85079200  | H                                     | 4.48713700  | 4.47388400  | 3.21873100  |
| C  | 3.31392100  | -2.21883400 | 1.33400600  | C                                     | 0.24300300  | 4.25125400  | -1.05861300 |
| C  | 2.36213300  | 1.62721600  | -2.48799700 | H                                     | -0.30723900 | 4.72615100  | -1.87815000 |
| C  | 2.41562900  | 0.70190700  | -3.55095800 | H                                     | -0.30764200 | 3.35595000  | -0.75477200 |
| C  | 3.13277000  | -0.64120000 | -3.44186400 | H                                     | 0.25063200  | 4.95086400  | -0.21570800 |
| C  | 1.79463600  | 1.06237600  | -4.75249700 | C                                     | 2.47862400  | 5.17022200  | -1.85172000 |
| H  | 1.81429300  | 0.37138900  | -5.58914500 | H                                     | 2.48815000  | 5.87873300  | -1.01635000 |
| C  | 1.14392500  | 2.28482800  | -4.88916000 | H                                     | 3.51643200  | 4.93172200  | -2.10685200 |
| C  | 1.10798900  | 3.17859900  | -3.82384700 | H                                     | 2.03292000  | 5.67845800  | -2.71345100 |
| H  | 0.59861500  | 4.13018200  | -3.94150500 |                                       |             |             |             |
| C  | 1.71918700  | 2.87653400  | -2.60045000 | <b>L<sub>3</sub>-TS18<sub>2</sub></b> |             |             |             |
| C  | 1.68590900  | 3.90353400  | -1.47228500 | N                                     | 2.28330700  | -0.35665000 | 0.70377200  |
| H  | 3.37971300  | -0.80816300 | -2.38934600 | O                                     | 4.73403100  | 0.04569900  | 0.38933400  |
| H  | 2.17170900  | 3.46498400  | -0.59670000 | O                                     | 3.54895800  | -0.89755400 | -1.34162600 |
| H  | 3.33201400  | 2.84418300  | 1.76797900  | B                                     | 3.49340300  | -0.38187800 | -0.05382500 |
| H  | 3.34642800  | -1.71745600 | 0.36272600  | C                                     | 1.17931500  | -1.20880200 | 0.20238800  |
| Br | -0.29860200 | -5.69077500 | -0.93184200 | H                                     | 1.12635200  | -1.07055400 | -0.88042700 |
| H  | 5.05658800  | 1.74605400  | -1.86151300 | C                                     | 2.20416600  | 0.26044800  | 1.97949800  |
| H  | 5.59740300  | 0.92305800  | 0.73810400  | C                                     | 1.37657700  | -0.25544600 | 2.99198500  |
| H  | 3.07860200  | -0.90267500 | 5.81880000  | H                                     | 0.78398400  | -1.14164900 | 2.80470700  |
| H  | 0.66238600  | 2.54060000  | -5.82859400 | C                                     | 1.31216600  | 0.35682100  | 4.24532400  |
| C  | 2.03515100  | -3.07856100 | 1.36142400  | H                                     | 0.65770000  | -0.06563300 | 5.00252900  |
| H  | 2.02270400  | -3.78177300 | 0.52282300  | C                                     | 2.07368600  | 1.49005600  | 4.52635500  |
| H  | 1.96631200  | -3.66270700 | 2.28542600  | H                                     | 2.02710500  | 1.96007300  | 5.50446500  |
| H  | 1.13945800  | -2.45368600 | 1.29923000  | C                                     | 2.89432200  | 2.01293600  | 3.52302100  |
| C  | 4.57900000  | -3.09229700 | 1.44182800  | H                                     | 3.48830400  | 2.90313300  | 3.71469700  |
| H  | 4.60770000  | -3.64210500 | 2.38868000  | C                                     | 2.95399700  | 1.41776300  | 2.26610000  |
| H  | 4.60138900  | -3.82815200 | 0.63117300  | H                                     | 3.58702800  | 1.84468200  | 1.49918000  |
| H  | 5.49101900  | -2.48905900 | 1.37913100  | C                                     | 5.65857800  | -0.04160000 | -0.72200300 |
| C  | 2.24265900  | -1.81556500 | -3.88762400 | C                                     | 7.01921700  | -0.47910900 | -0.18074100 |
| H  | 2.03604200  | -1.78359000 | -4.96275100 | H                                     | 7.41316100  | 0.29206300  | 0.48764800  |
| H  | 2.74470100  | -2.76658800 | -3.68026700 | H                                     | 7.73734400  | -0.62107700 | -0.99546800 |
| H  | 1.28451400  | -1.80860300 | -3.36265900 | H                                     | 6.94476100  | -1.40825900 | 0.38658700  |
| C  | 4.45637300  | -0.62727900 | -4.23372300 | C                                     | 5.76568000  | 1.36291700  | -1.33318400 |
| H  | 4.27326900  | -0.46455700 | -5.30145000 | H                                     | 4.79965400  | 1.70129700  | -1.71720400 |
| H  | 5.12897400  | 0.16542500  | -3.88977100 | H                                     | 6.49647100  | 1.39837800  | -2.14711400 |
| H  | 4.97843900  | -1.58402400 | -4.12499100 | H                                     | 6.08476300  | 2.06262400  | -0.55543500 |
| C  | 1.94309200  | 3.37891900  | 3.29906600  | C                                     | 4.94787300  | -1.08542900 | -1.67058600 |
| H  | 1.94569300  | 4.44144100  | 3.03235100  | C                                     | 5.13538600  | -0.83746700 | -3.16628600 |
| H  | 1.07952500  | 2.90782000  | 2.82036300  |                                       |             |             |             |

|    |             |             |             |    |             |             |             |
|----|-------------|-------------|-------------|----|-------------|-------------|-------------|
| H  | 4.57368800  | -1.58514000 | -3.73400000 | C  | -1.57899900 | 3.58708400  | 1.66276600  |
| H  | 6.19065200  | -0.92421500 | -3.44651000 | C  | 0.73377500  | 4.46676400  | 1.09030500  |
| H  | 4.77638000  | 0.14994700  | -3.46150100 | H  | 0.74681700  | 4.95853600  | 2.05648300  |
| C  | 5.29444200  | -2.54315900 | -1.33403600 | C  | 1.81051200  | 4.63250400  | 0.22466900  |
| H  | 5.15488900  | -2.74881300 | -0.26938400 | C  | 1.80491100  | 4.01745000  | -1.02325900 |
| H  | 6.32548300  | -2.78942400 | -1.60611100 | H  | 2.64116500  | 4.16890900  | -1.69903800 |
| H  | 4.62232100  | -3.20241100 | -1.88989200 | C  | 0.73325400  | 3.21161100  | -1.42645800 |
| C  | 1.35916100  | -2.65485000 | 0.48399800  | C  | 0.72350500  | 2.61925000  | -2.83404700 |
| C  | 0.61110300  | -3.61952200 | -0.23409700 | H  | -2.11253300 | 2.66217500  | 1.43027900  |
| H  | -0.08684400 | -3.27995700 | -0.99568300 | H  | -0.10214800 | 1.90604800  | -2.89811500 |
| C  | 0.75129000  | -4.98589200 | 0.00182700  | H  | -0.93332100 | -0.31186300 | -2.94837500 |
| H  | 0.16264800  | -5.69215900 | -0.57857400 | H  | -4.54543400 | 0.63158300  | 0.21623300  |
| C  | 1.64216900  | -5.44962100 | 0.97310300  | Br | -2.37011200 | 0.00915600  | 2.47368600  |
| H  | 1.75398800  | -6.51377500 | 1.15874600  | H  | -2.48474500 | 3.80876600  | -2.04440800 |
| C  | 2.39543600  | -4.51714600 | 1.69306700  | H  | -4.12737500 | 1.69120100  | -2.75478100 |
| H  | 3.10377200  | -4.85810600 | 2.44453300  | H  | -4.65544100 | -4.28914500 | -2.25641300 |
| C  | 2.25621000  | -3.14897600 | 1.45909600  | H  | 2.65351100  | 5.25054000  | 0.52104800  |
| H  | 2.86065700  | -2.44797100 | 2.02442400  | C  | -5.74790500 | -0.83098900 | 1.18921600  |
| C  | -1.85082000 | -2.49100400 | 1.70666700  | H  | -6.24266300 | -0.07701600 | 1.81001100  |
| C  | -1.86043600 | -3.01338000 | 3.04137200  | H  | -6.48555800 | -1.61353500 | 0.98108500  |
| C  | -0.80835500 | -3.67120900 | 3.57856300  | H  | -4.93323900 | -1.25348000 | 1.78027200  |
| H  | -0.86475700 | -4.08846400 | 4.57956800  | C  | -6.39900000 | 0.45720700  | -0.87559400 |
| H  | 0.11868400  | -3.81280800 | 3.03186300  | H  | -7.11219500 | -0.31419100 | -1.18724300 |
| H  | -2.76929300 | -2.88305700 | 3.62320000  | H  | -6.93380400 | 1.17504200  | -0.24460600 |
| H  | -2.78712100 | -2.36665000 | 1.17947500  | H  | -6.06918400 | 0.98323800  | -1.77612500 |
| H  | -0.97559900 | -2.68728000 | 1.10097900  | C  | -1.20364800 | 3.51464100  | 3.15186900  |
| Cu | -0.68938900 | -0.35814000 | 0.59607600  | H  | -0.77617200 | 4.45637400  | 3.51543500  |
| N  | -1.46429000 | 2.24418000  | -0.94686100 | H  | -2.10162300 | 3.31495200  | 3.74490500  |
| N  | -2.74176400 | 0.60212300  | -1.49024900 | H  | -0.48844700 | 2.71193500  | 3.34531500  |
| C  | -1.62647000 | 0.89879500  | -0.74569700 | C  | -2.53842700 | 4.76866500  | 1.40348600  |
| C  | -2.45394200 | 2.76520300  | -1.77705000 | H  | -2.05030900 | 5.72560200  | 1.62149400  |
| C  | -3.25558000 | 1.73169500  | -2.12323300 | H  | -2.87994500 | 4.79780500  | 0.36361700  |
| C  | -3.27328100 | -0.72746500 | -1.69388900 | H  | -3.42320300 | 4.68752200  | 2.04431600  |
| C  | -4.43734500 | -1.12075900 | -0.99860600 | C  | -0.46639900 | -2.15813200 | -3.90332300 |
| C  | -4.91431800 | -2.42021900 | -1.22499100 | H  | 0.36990600  | -1.69907000 | -4.44001300 |
| H  | -5.80545900 | -2.75669900 | -0.70577300 | H  | -0.05595100 | -2.67254100 | -3.03125100 |
| C  | -4.27086200 | -3.28445400 | -2.10450300 | H  | -0.90191700 | -2.90975500 | -4.57099000 |
| C  | -3.14697600 | -2.85746600 | -2.80712200 | C  | -2.04533500 | -0.40340300 | -4.78577000 |
| H  | -2.67148000 | -3.53202600 | -3.51061700 | H  | -2.61161500 | -1.12675800 | -5.38304400 |
| C  | -2.62969400 | -1.56833800 | -2.63237400 | H  | -2.71060400 | 0.43118200  | -4.54856700 |
| C  | -1.48144600 | -1.07180200 | -3.51176000 | H  | -1.22994500 | -0.01745500 | -5.40741500 |
| C  | -5.22146100 | -0.16896600 | -0.09591800 | C  | 2.01080700  | 1.84820200  | -3.17336100 |
| C  | -0.33362000 | 3.04211100  | -0.51839500 | H  | 2.88242400  | 2.51165200  | -3.20159200 |
| C  | -0.36844300 | 3.67701200  | 0.73962300  | H  | 2.21263300  | 1.05059900  | -2.45444500 |

|                                     |             |             |             |    |             |             |             |
|-------------------------------------|-------------|-------------|-------------|----|-------------|-------------|-------------|
| H                                   | 1.92161300  | 1.39355700  | -4.16654200 | C  | -1.04504600 | -3.73144400 | -0.30817400 |
| C                                   | 0.46269700  | 3.72275000  | -3.88125900 | H  | -0.32293300 | -3.64988600 | 0.49983100  |
| H                                   | 0.41334700  | 3.29407800  | -4.88829900 | C  | -1.52798200 | -4.98673200 | -0.66914400 |
| H                                   | -0.47884200 | 4.24759200  | -3.69080200 | H  | -1.18459000 | -5.86849100 | -0.13472700 |
| H                                   | 1.26519900  | 4.46842200  | -3.87224600 | C  | -2.45395300 | -5.11337300 | -1.70887700 |
| <b>L<sub>3</sub>-19<sub>2</sub></b> |             |             |             |    |             |             |             |
| N                                   | -1.89352000 | -0.11439300 | -0.79493900 | C  | -2.88652300 | -3.96627300 | -2.37577200 |
| O                                   | -4.31370800 | 0.39892400  | -0.48323800 | H  | -3.60767700 | -4.04705500 | -3.18478900 |
| O                                   | -3.25376200 | -0.83326300 | 1.14392900  | C  | -2.40098900 | -2.70732000 | -2.01516500 |
| B                                   | -3.12458700 | -0.15339800 | -0.05556400 | H  | -2.76188500 | -1.82924500 | -2.53882900 |
| C                                   | -0.97202200 | -1.22850200 | -0.51420000 | C  | 1.38586000  | -2.26539900 | -1.97950700 |
| H                                   | -0.79313000 | -1.26205500 | 0.55994700  | C  | 1.25386900  | -2.23415100 | -3.43113300 |
| C                                   | -1.77999400 | 0.70525300  | -1.95504400 | C  | 0.43461100  | -3.03662100 | -4.13877700 |
| C                                   | -1.14295000 | 0.26144200  | -3.12323000 | H  | 0.39920900  | -2.98517900 | -5.22343800 |
| H                                   | -0.71200500 | -0.72951200 | -3.16908600 | H  | -0.20493600 | -3.77199500 | -3.66028400 |
| C                                   | -1.07069500 | 1.08520800  | -4.24900500 | H  | 1.88005500  | -1.51317100 | -3.95148300 |
| H                                   | -0.56722300 | 0.71565300  | -5.13783200 | H  | 2.41867300  | -2.21112900 | -1.63540700 |
| C                                   | -1.64167400 | 2.35634200  | -4.24085800 | H  | 0.82329800  | -3.05576800 | -1.49510100 |
| H                                   | -1.59177400 | 2.99051800  | -5.12103800 | Cu | 0.95692100  | -0.54706600 | -0.95490500 |
| C                                   | -2.26873900 | 2.80602600  | -3.07549100 | N  | 1.50811300  | 1.95752000  | 1.11824000  |
| H                                   | -2.70381500 | 3.80116500  | -3.04001800 | N  | 2.46434100  | 0.07568800  | 1.55334500  |
| C                                   | -2.32583500 | 2.00103500  | -1.94177100 | C  | 1.48357200  | 0.63055800  | 0.76443200  |
| H                                   | -2.79206900 | 2.37391400  | -1.03828900 | C  | 2.50298900  | 2.21455100  | 2.05918000  |
| C                                   | -5.30755000 | 0.18539400  | 0.55096100  | C  | 3.10016000  | 1.03400500  | 2.33662800  |
| C                                   | -6.63668200 | -0.14446400 | -0.12880800 | C  | 2.74077300  | -1.34178200 | 1.67931500  |
| H                                   | -6.97108800 | 0.71746700  | -0.71312200 | C  | 3.91886600  | -1.87497800 | 1.11307500  |
| H                                   | -7.40988300 | -0.37168000 | 0.61282100  | C  | 4.14027300  | -3.25217800 | 1.26340100  |
| H                                   | -6.54268800 | -0.99364000 | -0.80747400 | H  | 5.03301100  | -3.69329800 | 0.83296700  |
| C                                   | -5.43770200 | 1.50052500  | 1.33072800  | C  | 3.24509000  | -4.05978400 | 1.95397200  |
| H                                   | -4.49589000 | 1.77487500  | 1.81119400  | C  | 2.11613900  | -3.49996400 | 2.54802700  |
| H                                   | -6.21703500 | 1.44291100  | 2.09681400  | H  | 1.44555600  | -4.13412500 | 3.11747000  |
| H                                   | -5.70369900 | 2.29772100  | 0.63087600  | C  | 1.84388200  | -2.13136200 | 2.44172000  |
| C                                   | -4.67748300 | -0.99695800 | 1.39269000  | C  | 0.68450100  | -1.51781600 | 3.22912500  |
| C                                   | -4.92301700 | -0.92282900 | 2.89840300  | C  | 4.98263000  | -1.01313200 | 0.43574300  |
| H                                   | -4.41093200 | -1.75315500 | 3.39350900  | C  | 0.50542900  | 2.97105100  | 0.83353700  |
| H                                   | -5.99205500 | -1.00691100 | 3.12063300  | C  | 0.66927400  | 3.84575200  | -0.25878800 |
| H                                   | -4.55164900 | 0.00862000  | 3.32829000  | C  | 1.91251700  | 3.83162800  | -1.13671500 |
| C                                   | -5.06095300 | -2.38843600 | 0.87074500  | C  | -0.31905500 | 4.81962200  | -0.45866000 |
| H                                   | -4.87870200 | -2.47761900 | -0.20298000 | H  | -0.22588400 | 5.49817100  | -1.29970700 |
| H                                   | -6.11200500 | -2.61870100 | 1.06985500  | C  | -1.40498900 | 4.93953500  | 0.40111700  |
| H                                   | -4.44188600 | -3.13645500 | 1.37320900  | C  | -1.50782400 | 4.10551200  | 1.51082300  |
| C                                   | -1.46992500 | -2.55928000 | -0.96932400 | H  | -2.33214900 | 4.23901000  | 2.20485400  |
|                                     |             |             |             | C  | -0.54919100 | 3.11730800  | 1.76424000  |
|                                     |             |             |             | C  | -0.60903500 | 2.34295600  | 3.08061500  |

|    |             |             |             |   |             |             |             |
|----|-------------|-------------|-------------|---|-------------|-------------|-------------|
| H  | 2.38579800  | 2.85352000  | -1.03876600 | N | 2.44512700  | -1.10614500 | -0.64505400 |
| H  | 0.12876200  | 1.53931100  | 3.04183900  | O | 4.76082300  | -1.72664200 | 0.01476300  |
| H  | 0.32570400  | -0.64661200 | 2.67496000  | O | 4.02418800  | 0.37647000  | 0.57446100  |
| H  | 4.52456500  | -0.06000400 | 0.16171000  | B | 3.72356000  | -0.81820900 | -0.04602000 |
| Br | 2.83799900  | 0.52083100  | -2.15578400 | C | 1.49523000  | -0.00661900 | -0.75559800 |
| H  | 2.67270300  | 3.20456300  | 2.44922500  | H | 1.01550900  | 0.21753900  | 0.20502200  |
| H  | 3.90085000  | 0.78512700  | 3.01297100  | C | 2.06938100  | -2.48567000 | -0.72485400 |
| H  | 3.43587000  | -5.12512400 | 2.04900600  | C | 0.93976000  | -2.98587700 | -0.06183200 |
| H  | -2.15917900 | 5.70113300  | 0.22238400  | H | 0.31162200  | -2.30868000 | 0.50848300  |
| C  | 5.52842800  | -1.62616300 | -0.86571900 | C | 0.59372300  | -4.33330700 | -0.17695300 |
| H  | 6.23277700  | -0.92764900 | -1.32827800 | H | -0.30445900 | -4.69525900 | 0.31295000  |
| H  | 6.06607300  | -2.56449300 | -0.68994800 | C | 1.38775200  | -5.20863500 | -0.91996800 |
| H  | 4.72851400  | -1.80269700 | -1.58695000 | H | 1.11791600  | -6.25734700 | -1.00261900 |
| C  | 6.14696500  | -0.74174500 | 1.41391800  | C | 2.52795300  | -4.72017500 | -1.55913400 |
| H  | 6.65458400  | -1.67351900 | 1.68795500  | H | 3.15456200  | -5.38776500 | -2.14407700 |
| H  | 6.88574700  | -0.08017700 | 0.94933400  | C | 2.86206900  | -3.36911400 | -1.47186100 |
| H  | 5.81023700  | -0.26850000 | 2.34168500  | H | 3.74160400  | -2.98850900 | -1.97804700 |
| C  | 1.60819700  | 4.02127700  | -2.63151200 | C | 5.74890000  | -1.18974600 | 0.93577700  |
| H  | 1.24492100  | 5.03154700  | -2.85558800 | C | 7.13614600  | -1.59763200 | 0.44453000  |
| H  | 2.52384200  | 3.86556600  | -3.20997700 | H | 7.23921600  | -2.68533200 | 0.49651400  |
| H  | 0.86596800  | 3.30088600  | -2.98204800 | H | 7.91728000  | -1.15332700 | 1.07026800  |
| C  | 2.91513400  | 4.89964000  | -0.64882500 | H | 7.30182700  | -1.29191100 | -0.58982600 |
| H  | 2.49302800  | 5.90834300  | -0.72941700 | C | 5.46755000  | -1.81745200 | 2.30773000  |
| H  | 3.20342700  | 4.74301600  | 0.39625800  | H | 4.48026300  | -1.53056800 | 2.68060100  |
| H  | 3.82652000  | 4.86540600  | -1.25532900 | H | 6.21702600  | -1.52496600 | 3.04947400  |
| C  | -0.52318400 | -2.44945000 | 3.42471700  | H | 5.48710500  | -2.90612800 | 2.20809400  |
| H  | -1.33769500 | -1.89101000 | 3.89591900  | C | 5.44521300  | 0.35817200  | 0.88180600  |
| H  | -0.90339600 | -2.84135700 | 2.47859400  | C | 5.66410100  | 1.11188600  | 2.19148100  |
| H  | -0.28982600 | -3.29553900 | 4.08034700  | H | 5.38920100  | 2.16215000  | 2.05824700  |
| C  | 1.18907600  | -1.02904700 | 4.60588400  | H | 6.71655100  | 1.07302100  | 2.49158100  |
| H  | 1.56701300  | -1.87036300 | 5.19750700  | H | 5.05550800  | 0.70364100  | 3.00019500  |
| H  | 1.99498800  | -0.29655400 | 4.50990600  | C | 6.16667600  | 1.07701700  | -0.26576500 |
| H  | 0.37381400  | -0.56077800 | 5.16846800  | H | 6.03376300  | 0.54760000  | -1.21295800 |
| C  | -1.97206200 | 1.68604100  | 3.34816500  | H | 7.23882600  | 1.17291100  | -0.06856000 |
| H  | -2.77235000 | 2.42983200  | 3.42897800  | H | 5.74215400  | 2.07729500  | -0.38174000 |
| H  | -2.23705500 | 0.97415800  | 2.56337800  | C | 2.00728300  | 1.20767200  | -1.40528800 |
| H  | -1.94316400 | 1.14203700  | 4.29933700  | C | 1.52013100  | 2.47006500  | -1.00232200 |
| C  | -0.21773100 | 3.26605900  | 4.25485200  | H | 0.76611400  | 2.52887500  | -0.22571600 |
| H  | -0.19899000 | 2.70382100  | 5.19495800  | C | 2.00562100  | 3.64065900  | -1.56886000 |
| H  | 0.77096700  | 3.71115400  | 4.10759800  | H | 1.61536200  | 4.59705300  | -1.23394800 |
| H  | -0.93585900 | 4.08551100  | 4.36699900  | C | 2.99438800  | 3.59000200  | -2.55830700 |
|    |             |             |             | H | 3.37742200  | 4.50741000  | -2.99653900 |
|    |             |             |             | C | 3.48472700  | 2.35393600  | -2.97542600 |
|    |             |             |             | H | 4.25200100  | 2.30219800  | -3.74324200 |

**L<sub>3</sub>-TS20<sub>2</sub>**

|    |             |             |             |                                      |             |             |             |
|----|-------------|-------------|-------------|--------------------------------------|-------------|-------------|-------------|
| C  | 2.98934900  | 1.17421800  | -2.41700900 | H                                    | -3.96472900 | -5.48551100 | -0.97205500 |
| H  | 3.39593300  | 0.22042300  | -2.72969100 | C                                    | -2.39071700 | 4.97041000  | -0.55449700 |
| C  | 0.04745800  | -1.03352500 | -2.51677900 | H                                    | -3.28918500 | 5.13076000  | -1.15867900 |
| C  | 0.98133600  | -0.84642800 | -3.60362100 | H                                    | -2.06546200 | 5.95065100  | -0.18697800 |
| C  | 0.89688400  | 0.15010800  | -4.50858600 | H                                    | -1.62647800 | 4.55339900  | -1.21218600 |
| H  | 1.61699500  | 0.24008700  | -5.31629200 | C                                    | -3.79202800 | 4.62313600  | 1.51197100  |
| H  | 0.10692800  | 0.89386500  | -4.44579600 | H                                    | -4.09865900 | 3.95221700  | 2.32024400  |
| H  | 1.80935100  | -1.55187700 | -3.66466900 | H                                    | -3.42299200 | 5.54596400  | 1.97413300  |
| H  | 0.03955600  | -2.01628200 | -2.06617600 | H                                    | -4.68515700 | 4.87403100  | 0.92990800  |
| H  | -0.94530900 | -0.63705400 | -2.74791400 | C                                    | -5.76525600 | -0.48682200 | -1.51398700 |
| C  | -2.01542200 | 0.19734600  | 0.66900900  | H                                    | -6.45775200 | -1.30399500 | -1.74819000 |
| C  | -3.40841300 | 1.13467500  | 2.22270000  | H                                    | -5.89750900 | -0.22620400 | -0.45911800 |
| C  | -4.00371500 | 0.00240800  | 1.78397700  | H                                    | -6.05201800 | 0.38519600  | -2.11086900 |
| N  | -3.14063800 | -0.56841300 | 0.85213100  | C                                    | -4.13799400 | -1.13283500 | -3.33676400 |
| N  | -2.19936800 | 1.24281500  | 1.54150100  | H                                    | -3.13973500 | -1.51331900 | -3.57329100 |
| C  | -3.08540100 | -2.99420100 | 1.18828200  | H                                    | -4.87610800 | -1.84225700 | -3.72941900 |
| C  | -3.35720800 | -1.90277400 | 0.33196800  | H                                    | -4.26364900 | -0.18784400 | -3.87163900 |
| C  | -3.88628400 | -2.07019600 | -0.96531500 | C                                    | -1.42083500 | -3.68837900 | 3.01750500  |
| C  | -4.08425200 | -3.38363900 | -1.41259600 | H                                    | -1.63871100 | -4.75875900 | 2.93976000  |
| C  | -3.79841800 | -4.47779600 | -0.60153600 | H                                    | -0.55520400 | -3.47537900 | 2.38582000  |
| C  | -3.31722600 | -4.28255900 | 0.68950800  | H                                    | -1.13439900 | -3.49285100 | 4.05660300  |
| H  | -4.47752200 | -3.54891200 | -2.40949800 | C                                    | -3.80842600 | -3.11336600 | 3.60281000  |
| H  | -3.12530800 | -5.14213000 | 1.32466600  | H                                    | -3.50588300 | -2.93774100 | 4.64086900  |
| C  | -0.12387600 | 1.95054400  | 2.65146200  | H                                    | -4.67471600 | -2.47937400 | 3.39199800  |
| C  | 0.77205100  | 2.97535700  | 2.97535200  | H                                    | -4.13447100 | -4.15578000 | 3.51932700  |
| C  | 0.56181600  | 4.28065900  | 2.53995200  | C                                    | -0.66364700 | 0.41945500  | 4.58178300  |
| C  | -0.55507900 | 4.58645200  | 1.77150000  | H                                    | -1.73417500 | 0.61954100  | 4.47983900  |
| C  | -1.48330800 | 3.60201100  | 1.40230200  | H                                    | -0.54600900 | -0.59180300 | 4.98743700  |
| C  | -1.23884500 | 2.28391300  | 1.84520400  | H                                    | -0.25786500 | 1.12552500  | 5.31495100  |
| H  | 1.64259900  | 2.75137300  | 3.58169500  | C                                    | 1.55470100  | 0.15611600  | 3.40140500  |
| H  | -0.71350700 | 5.60846500  | 1.44469800  | H                                    | 2.13607700  | 0.32577100  | 2.49063100  |
| Cu | -0.75766900 | 0.18182600  | -0.91140600 | H                                    | 2.03392300  | 0.71193300  | 4.21524500  |
| H  | -4.94441200 | -0.45275700 | 2.04633600  | H                                    | 1.62240100  | -0.90634800 | 3.65892600  |
| H  | -3.72134900 | 1.86327600  | 2.95143200  |                                      |             |             |             |
| C  | -4.30734600 | -0.88585900 | -1.82890800 | <b>L<sub>3</sub>CuCl<sub>3</sub></b> |             |             |             |
| H  | -3.67063200 | -0.03092800 | -1.58742400 | C                                    | 0.00000000  | -0.00001300 | -0.17579200 |
| C  | -2.63651800 | -2.82250800 | 2.64049100  | C                                    | 0.67844500  | 0.00096100  | -2.34872400 |
| H  | -2.34276300 | -1.78012600 | 2.78739800  | C                                    | -0.67844700 | 0.00092300  | -2.34872300 |
| C  | -2.71697700 | 3.99995000  | 0.59500700  | N                                    | -1.07680500 | 0.00038100  | -1.01686900 |
| H  | -3.12134000 | 3.09591000  | 0.13225700  | N                                    | 1.07680400  | 0.00039200  | -1.01687100 |
| C  | 0.07680500  | 0.55119600  | 3.23275100  | C                                    | -3.10594400 | 1.23666000  | -0.39615200 |
| H  | -0.36899700 | -0.16600300 | 2.53789100  | C                                    | -2.45858000 | 0.00025200  | -0.58959600 |
| Br | -1.86136900 | 1.91605800  | -2.39964200 | C                                    | -3.10592900 | -1.23626500 | -0.39679300 |
| H  | 1.26957100  | 5.06110300  | 2.80517200  |                                      |             |             |             |



|    |             |             |             |                                        |             |             |             |
|----|-------------|-------------|-------------|----------------------------------------|-------------|-------------|-------------|
| C  | -4.44949900 | -1.20587500 | -0.00411700 | H                                      | -3.05065800 | 2.85420900  | -2.66329600 |
| C  | -5.11660800 | 0.00003700  | 0.18990300  | H                                      | -4.09344900 | 3.65324400  | -1.48005000 |
| C  | -4.44951800 | 1.20605500  | -0.00349500 | H                                      | -2.51035400 | 4.34035900  | -1.86229200 |
| H  | -4.97650700 | -2.14121800 | 0.15750800  | C                                      | -2.35708600 | 3.37646600  | 0.73240500  |
| H  | -4.97653300 | 2.14131200  | 0.15860800  | H                                      | -3.36256700 | 3.63888600  | 1.07843800  |
| C  | 3.10589600  | 1.23671300  | -0.39607100 | H                                      | -1.86786200 | 2.80408800  | 1.52602200  |
| C  | 4.44947100  | 1.20613400  | -0.00343500 | H                                      | -1.80143000 | 4.30960400  | 0.58951000  |
| C  | 5.11660900  | 0.00012700  | 0.18989700  | C                                      | 2.35709900  | 3.37655500  | 0.73247800  |
| C  | 4.44954600  | -1.20579500 | -0.00418800 | H                                      | 1.86804000  | 2.80418400  | 1.52620200  |
| C  | 3.10597700  | -1.23621300 | -0.39688200 | H                                      | 3.36260800  | 3.63910300  | 1.07834100  |
| C  | 2.45858000  | 0.00028900  | -0.58959900 | H                                      | 1.80133400  | 4.30963200  | 0.58962000  |
| H  | 4.97645900  | 2.14139900  | 0.15871400  | C                                      | 3.05363400  | 3.40107300  | -1.71450000 |
| H  | 4.97658200  | -2.14113100 | 0.15739100  | H                                      | 4.09328100  | 3.65323300  | -1.48015600 |
| Cu | 0.00000100  | -0.00087700 | 1.71508300  | H                                      | 3.05032500  | 2.85421100  | -2.66327100 |
| H  | -1.39033100 | 0.00133800  | -3.15837900 | H                                      | 2.51015100  | 4.34037900  | -1.86221100 |
| H  | 1.39032700  | 0.00123400  | -3.15838100 |                                        |             |             |             |
| C  | -2.40423300 | -2.57730200 | -0.58643300 | <b>L<sub>3</sub>CuOtBu<sub>3</sub></b> |             |             |             |
| H  | -1.36947500 | -2.38099600 | -0.88111900 | O                                      | -0.03548600 | 2.79610800  | -1.27837500 |
| C  | -2.40425600 | 2.57780300  | -0.58507000 | C                                      | 1.00052800  | 3.65186200  | -1.67699600 |
| H  | -1.36942800 | 2.38166500  | -0.87962400 | C                                      | 1.95304300  | 3.95074600  | -0.49906200 |
| C  | 2.40432100  | -2.57726800 | -0.58654300 | H                                      | 1.38339900  | 4.36193900  | 0.34128000  |
| H  | 1.36958500  | -2.38098900 | -0.88132200 | H                                      | 2.43719200  | 3.02573000  | -0.16364300 |
| C  | 2.40416700  | 2.57783600  | -0.58496700 | H                                      | 2.73790700  | 4.66855100  | -0.76978200 |
| H  | 1.36932000  | 2.38167200  | -0.87943300 | C                                      | 0.34953800  | 4.96767500  | -2.15238400 |
| Cl | 0.00000200  | -0.00190400 | 3.84042600  | H                                      | 1.09372300  | 5.70109500  | -2.48597400 |
| H  | 6.15822600  | 0.00006700  | 0.49792200  | H                                      | -0.33480900 | 4.76356700  | -2.98211700 |
| H  | -6.15822500 | -0.00005400 | 0.49792800  | H                                      | -0.23273600 | 5.40875400  | -1.33688600 |
| C  | 3.05419200  | -3.40011400 | -1.71612400 | C                                      | 1.80357300  | 3.03010800  | -2.84012800 |
| H  | 3.05132800  | -2.85288200 | -2.66468400 | H                                      | 2.27049100  | 2.09348900  | -2.51299100 |
| H  | 4.09371900  | -3.65246500 | -1.48145300 | H                                      | 1.13174600  | 2.80298500  | -3.67459600 |
| H  | 2.51069500  | -4.33931600 | -1.86442800 | H                                      | 2.59467500  | 3.69800200  | -3.20467300 |
| C  | 2.35678000  | -3.37642400 | 0.73062100  | C                                      | -0.16941400 | -0.53885500 | 0.24765400  |
| H  | 3.36217300  | -3.63893500 | 1.07684100  | C                                      | 0.25210400  | -2.56165200 | 1.21219000  |
| H  | 1.86731700  | -2.80435000 | 1.52431200  | C                                      | -1.09513200 | -2.41842600 | 1.14799500  |
| H  | 1.80118900  | -4.30952400 | 0.58722300  | N                                      | -1.33680700 | -1.18243400 | 0.55832300  |
| C  | -2.35680000 | -3.37651900 | 0.73069800  | N                                      | 0.80258300  | -1.40961100 | 0.65968100  |
| H  | -1.86750800 | -2.80445600 | 1.52450000  | C                                      | -3.28101700 | -0.94437500 | -0.92300100 |
| H  | -3.36222400 | -3.63916100 | 1.07673900  | C                                      | -2.65924600 | -0.65481600 | 0.30807600  |
| H  | -1.80109900 | -4.30955700 | 0.58733400  | C                                      | -3.27958900 | 0.11796800  | 1.30986100  |
| C  | -3.05398800 | -3.40011700 | -1.71610500 | C                                      | -4.56972000 | 0.59571200  | 1.04956800  |
| H  | -4.09355000 | -3.65244600 | -1.48156600 | C                                      | -5.21131300 | 0.31947800  | -0.15409500 |
| H  | -3.05098400 | -2.85287500 | -2.66465800 | C                                      | -4.57069100 | -0.43979600 | -1.12872100 |
| H  | -2.51049100 | -4.33933100 | -1.86434800 | H                                      | -5.07430500 | 1.19877300  | 1.79830500  |
| C  | -3.05383500 | 3.40106400  | -1.71451900 |                                        |             |             |             |

|    |             |             |             |                                    |             |             |             |
|----|-------------|-------------|-------------|------------------------------------|-------------|-------------|-------------|
| H  | -5.07577300 | -0.63952700 | -2.06879900 | C                                  | -3.39037600 | -0.07376300 | 3.83789500  |
| C  | 2.88246200  | -1.60936000 | -0.62834100 | H                                  | -4.38102300 | 0.38789000  | 3.90759900  |
| C  | 4.26186100  | -1.38335400 | -0.71257800 | H                                  | -3.53261300 | -1.15777000 | 3.77514900  |
| C  | 4.95349300  | -0.75609600 | 0.31950400  | H                                  | -2.85794000 | 0.14524200  | 4.76962800  |
| C  | 4.27653100  | -0.34112700 | 1.46268000  | C                                  | -2.35551300 | 1.98080200  | 2.74828100  |
| C  | 2.89718600  | -0.53957100 | 1.60096400  | H                                  | -1.76067100 | 2.35198800  | 1.90836800  |
| C  | 2.22304900  | -1.17488000 | 0.53890700  | H                                  | -3.29996100 | 2.53527900  | 2.76321800  |
| H  | 4.79931700  | -1.70148800 | -1.60078500 | H                                  | -1.82087000 | 2.20858900  | 3.67704700  |
| H  | 4.82585700  | 0.14803400  | 2.26127600  | H                                  | 6.02333400  | -0.58920300 | 0.23237600  |
| Cu | 0.00943200  | 1.15367000  | -0.54108800 | H                                  | -6.21128800 | 0.70284900  | -0.33598600 |
| H  | -1.89599600 | -3.06867000 | 1.46119800  |                                    |             |             |             |
| H  | 0.86558800  | -3.36234300 | 1.59252700  | <b>L<sub>3</sub>-4<sub>3</sub></b> |             |             |             |
| C  | -2.59819900 | 0.46298200  | 2.63019900  | C                                  | -2.01371300 | -0.13360000 | 0.49968300  |
| H  | -1.61828100 | -0.02225800 | 2.64338200  | C                                  | -3.83588600 | -0.97254400 | 1.59281800  |
| C  | -2.59864800 | -1.74937500 | -2.02451300 | C                                  | -3.73842300 | 0.33883200  | 1.91745200  |
| H  | -1.62716900 | -2.08294800 | -1.64887200 | N                                  | -2.63041400 | 0.83827600  | 1.24273400  |
| C  | 2.19029400  | -0.08147600 | 2.87321000  | N                                  | -2.78315500 | -1.24598900 | 0.72922700  |
| H  | 1.11902000  | -0.26277900 | 2.75017200  | C                                  | -2.95285800 | 3.16144400  | 0.52876800  |
| C  | 2.15880700  | -2.30556100 | -1.77669000 | C                                  | -2.26328800 | 2.23468500  | 1.33843700  |
| H  | 1.09748400  | -2.36815100 | -1.52122000 | C                                  | -1.30960400 | 2.62338200  | 2.29904900  |
| C  | -2.32973000 | -0.87257300 | -3.26389100 | C                                  | -1.06294100 | 3.99499900  | 2.43989800  |
| H  | -1.79500900 | -1.44857200 | -4.02727400 | C                                  | -1.73156600 | 4.93378100  | 1.65998400  |
| H  | -3.26444300 | -0.51555700 | -3.70961500 | C                                  | -2.66208000 | 4.51874500  | 0.71157400  |
| H  | -1.72502800 | 0.00189000  | -3.00546400 | H                                  | -0.33433900 | 4.32893800  | 3.17158300  |
| C  | -3.40265100 | -3.01024900 | -2.39483600 | H                                  | -3.17467000 | 5.25927600  | 0.10530500  |
| H  | -3.57099000 | -3.65005100 | -1.52225700 | C                                  | -3.26131500 | -2.87279900 | -1.04372300 |
| H  | -4.38150700 | -2.75605400 | -2.81511000 | C                                  | -3.09388100 | -4.16480700 | -1.55631000 |
| H  | -2.86386500 | -3.59648100 | -3.14687700 | C                                  | -2.28688100 | -5.09688400 | -0.90989500 |
| C  | 2.66887800  | -3.74747400 | -1.96903800 | C                                  | -1.63404900 | -4.75683500 | 0.27101300  |
| H  | 3.72654100  | -3.76500000 | -2.25283400 | C                                  | -1.76782100 | -3.48089900 | 0.83315300  |
| H  | 2.56123400  | -4.33613800 | -1.05201300 | C                                  | -2.58086500 | -2.55507700 | 0.15001600  |
| H  | 2.10439300  | -4.24881700 | -2.76250600 | H                                  | -3.60255000 | -4.44383000 | -2.47386800 |
| C  | 2.26254000  | -1.49776800 | -3.08455300 | H                                  | -1.01395600 | -5.49466400 | 0.77034700  |
| H  | 1.86211400  | -0.48783400 | -2.95803000 | Cu                                 | -0.41603700 | -0.09441100 | -0.52990000 |
| H  | 3.30097100  | -1.40989000 | -3.42175100 | H                                  | -4.34340400 | 0.96270200  | 2.55495700  |
| H  | 1.69661500  | -1.99292500 | -3.88115700 | H                                  | -4.54339800 | -1.73017900 | 1.88796000  |
| C  | 2.36748600  | 1.42966000  | 3.11401900  | C                                  | -0.57662900 | 1.62732400  | 3.19127500  |
| H  | 1.80138900  | 1.73930200  | 3.99922000  | H                                  | -0.81211200 | 0.61983900  | 2.83756400  |
| H  | 3.41708500  | 1.69108500  | 3.28615500  | C                                  | -4.00813600 | 2.74611400  | -0.49412100 |
| H  | 2.01041200  | 2.01110000  | 2.25943700  | H                                  | -4.01810900 | 1.65380000  | -0.54834400 |
| C  | 2.65755500  | -0.89847000 | 4.09438600  | C                                  | -1.08932900 | -3.16224000 | 2.16177100  |
| H  | 2.49075200  | -1.97082300 | 3.94798600  | H                                  | -1.21775800 | -2.09490700 | 2.36156700  |
| H  | 3.72562800  | -0.75195200 | 4.28793500  | C                                  | -4.18287200 | -1.88627400 | -1.75672600 |
| H  | 2.11122300  | -0.58975200 | 4.99211700  |                                    |             |             |             |

|   |             |             |             |   |             |             |             |
|---|-------------|-------------|-------------|---|-------------|-------------|-------------|
| H | -4.05754600 | -0.90649700 | -1.28728200 | H | 5.84293200  | 0.44647700  | 2.53187600  |
| O | 1.14077700  | -0.40931900 | -1.60617700 | C | 6.24408900  | -1.67432200 | -0.18371300 |
| C | 1.26244400  | -1.32042600 | -2.72845000 | H | 6.88994000  | -0.97172900 | -0.71757800 |
| C | 0.35123300  | -2.52076000 | -2.45618400 | H | 6.87405700  | -2.44289000 | 0.27580000  |
| H | 0.65964400  | -3.03854800 | -1.54346800 | H | 5.59181500  | -2.15131600 | -0.92022300 |
| H | -0.68916500 | -2.20399500 | -2.33486900 | C | 4.50924600  | -3.25056100 | 1.55629700  |
| H | 0.39071900  | -3.23202400 | -3.28880300 | H | 5.38147500  | -3.48805600 | 2.17553100  |
| C | 2.71214300  | -1.81132000 | -2.88024400 | H | 3.63996100  | -3.75105000 | 1.99363500  |
| H | 2.77384900  | -2.50882300 | -3.72316000 | H | 4.66841300  | -3.66487300 | 0.55900600  |
| H | 3.38863400  | -0.97616500 | -3.07070100 | C | 3.85199200  | -1.23426100 | 2.89529100  |
| H | 3.03337600  | -2.33621700 | -1.97661800 | H | 2.92916800  | -1.73749100 | 3.19697700  |
| C | 0.81825900  | -0.58396600 | -4.00242500 | H | 4.61824200  | -1.44026000 | 3.64969600  |
| H | 0.87119900  | -1.24347800 | -4.87689200 | H | 3.65962000  | -0.15839000 | 2.87679200  |
| H | -0.21610300 | -0.23549600 | -3.89895100 | H | -2.16963500 | -6.09327600 | -1.32637900 |
| H | 1.46453800  | 0.27988700  | -4.16615800 | H | -1.52334500 | 5.99211400  | 1.78823000  |
| B | 2.29831600  | 0.55414900  | -1.13198100 | C | -1.06533100 | 1.73278300  | 4.65027400  |
| O | 1.60228800  | 1.63548600  | -0.38976000 | H | -0.85149000 | 2.72225000  | 5.06900600  |
| O | 2.88831500  | 1.20219400  | -2.30285100 | H | -2.14482400 | 1.56412600  | 4.72975400  |
| C | 2.90713300  | 2.61021500  | -2.10342300 | H | -0.55924900 | 0.98985900  | 5.27609400  |
| C | 1.66455200  | 2.85043400  | -1.16087900 | C | 0.95224600  | 1.78965900  | 3.09640900  |
| C | 0.34985800  | 3.00877300  | -1.94509300 | H | 1.44360800  | 1.00182500  | 3.67753800  |
| H | -0.48255800 | 2.98386600  | -1.23545400 | H | 1.29221400  | 1.72432400  | 2.05861000  |
| H | 0.30341500  | 3.96084600  | -2.48606600 | H | 1.28089400  | 2.75068500  | 3.50800300  |
| H | 0.22088900  | 2.19325600  | -2.66044000 | C | 0.42516900  | -3.43679200 | 2.13196600  |
| C | 1.82333900  | 4.03641400  | -0.20478000 | H | 0.86212200  | -3.18943900 | 3.10566900  |
| H | 1.97746400  | 4.96963200  | -0.75945400 | H | 0.64094900  | -4.49335900 | 1.93888900  |
| H | 0.92109600  | 4.15242500  | 0.40209800  | H | 0.93711300  | -2.83722000 | 1.37427000  |
| H | 2.67036800  | 3.89002700  | 0.46819400  | C | -1.76967500 | -3.93238000 | 3.31280200  |
| C | 2.81113200  | 3.30227900  | -3.46895100 | H | -2.84010800 | -3.70833400 | 3.37111900  |
| H | 1.93773700  | 2.96704800  | -4.03232000 | H | -1.66402900 | -5.01493500 | 3.18244500  |
| H | 2.76081500  | 4.39217900  | -3.36210900 | H | -1.31488100 | -3.66509900 | 4.27255000  |
| H | 3.70172500  | 3.06363500  | -4.05902600 | C | -5.41505200 | 3.19874900  | -0.05418900 |
| C | 4.24498300  | 3.00311800  | -1.44461200 | H | -5.67846000 | 2.79711400  | 0.92975900  |
| H | 4.35396400  | 4.08887800  | -1.34416200 | H | -5.47970000 | 4.29044900  | 0.00532600  |
| H | 4.35874000  | 2.53845200  | -0.46368900 | H | -6.16916000 | 2.85824900  | -0.77190100 |
| H | 5.05878300  | 2.63348900  | -2.07558400 | C | -3.68323200 | 3.26280200  | -1.90857500 |
| B | 3.40622700  | -0.30190200 | -0.09994500 | H | -3.68911300 | 4.35697000  | -1.95230300 |
| C | 5.42839700  | -0.89709700 | 0.86126800  | H | -2.70007100 | 2.92007900  | -2.24173000 |
| O | 4.70331100  | 0.12938100  | 0.14808600  | H | -4.43237100 | 2.90185000  | -2.62164300 |
| C | 4.26567500  | -1.74183800 | 1.50600200  | C | -3.82792000 | -1.71944700 | -3.24597000 |
| O | 3.15615900  | -1.47951100 | 0.60852900  | H | -2.78868500 | -1.40475200 | -3.37602900 |
| C | 6.37642100  | -0.22297600 | 1.85439900  | H | -3.96985200 | -2.64966600 | -3.80600100 |
| H | 6.92029700  | -0.96438000 | 2.45050500  | H | -4.47256800 | -0.96083800 | -3.70239000 |
| H | 7.11124700  | 0.37385600  | 1.30609200  | C | -5.66030100 | -2.29549100 | -1.58734800 |

H -5.85516300 -3.27176000 -2.04428400  
H -5.94127300 -2.36175700 -0.53122200  
H -6.31880300 -1.56347400 -2.06720300

**L<sub>3</sub>-TS<sub>5</sub>**

C 1.71817000 0.29936500 0.51675000  
C 3.29275600 1.33768700 1.80907900  
C 3.78232000 0.11848100 1.48371700  
N 2.81986500 -0.49856600 0.69377200  
N 2.04450600 1.44136600 1.20649200  
C 3.71387300 -1.82004400 -1.16811400  
C 3.07673300 -1.78822200 0.09006500  
C 2.78864200 -2.95230900 0.82650300  
C 3.14775900 -4.18083400 0.25658200  
C 3.77236000 -4.24445600 -0.98520600  
C 4.05030200 -3.07534800 -1.68813300  
H 2.93692300 -5.09800500 0.79772800  
H 4.54302200 -3.13646300 -2.65372800  
C 1.77440500 3.73320700 0.39541100  
C 1.11960000 4.96851100 0.48390400  
C 0.05847100 5.15649900 1.36341100  
C -0.37352800 4.10895900 2.17309500  
C 0.24099900 2.85160000 2.12934600  
C 1.31158600 2.69013500 1.22625300  
H 1.45103700 5.79255100 -0.14065100  
H -1.20348100 4.26998000 2.85140200  
Cu -0.02605600 -0.18386500 -0.19932300  
H 4.71159100 -0.36776300 1.73203900  
H 3.70976800 2.13923100 2.39645200  
C 2.13805300 -2.91683900 2.20461400  
H 1.89776900 -1.87632200 2.44014900  
C 4.08883800 -0.55743100 -1.94016500  
H 3.65054800 0.30014100 -1.42298900  
C -0.20286000 1.73596800 3.07105400  
H 0.01193600 0.78141300 2.58191000  
C 2.96808600 3.58612800 -0.54787100  
H 3.29761900 2.54433200 -0.52441400  
O -1.01851000 -2.11012900 -0.84872100  
C -1.08373800 -2.86064900 -2.08104900  
C 0.36991200 -3.17125300 -2.45163100  
H 0.92128100 -2.24471300 -2.63428200  
H 0.86698200 -3.70816500 -1.63959300  
H 0.42031500 -3.78484800 -3.35802500

C -1.75382500 -2.07408900 -3.21836400  
H -1.72341200 -2.66384100 -4.14241500  
H -2.79607500 -1.85746800 -2.97762800  
H -1.24111400 -1.12547000 -3.39026800  
C -1.84116800 -4.17661100 -1.83896100  
H -1.83336300 -4.79792600 -2.74234900  
H -1.37080900 -4.74548100 -1.03055800  
H -2.87909800 -3.97149400 -1.57251100  
B -2.07733100 -1.28639500 -0.21661900  
O -2.06757400 -1.40104500 1.23143400  
O -3.43237000 -1.56039400 -0.64925800  
C -4.27203900 -1.81714800 0.49383000  
C -3.23675000 -2.11550300 1.65395700  
C -2.89956700 -3.61132400 1.79792800  
H -2.09084900 -3.71997300 2.52535300  
H -3.75723200 -4.18930400 2.15910500  
H -2.56102500 -4.04133100 0.85476300  
C -3.65652700 -1.58591000 3.02993200  
H -4.57449700 -2.07107500 3.38096900  
H -2.86608100 -1.80159800 3.75644500  
H -3.81501600 -0.50720300 3.01434200  
C -5.19924700 -2.98858400 0.14598600  
H -4.64408100 -3.88605800 -0.13065300  
H -5.85520500 -3.23453800 0.98892400  
H -5.83255100 -2.70975700 -0.70205100  
C -5.13933400 -0.57963400 0.76991600  
H -5.82126400 -0.74805400 1.60995000  
H -4.52308300 0.29586500 0.97682000  
H -5.74472600 -0.36703600 -0.11564300  
B -1.97553800 0.59914000 -0.81607900  
C -2.32711600 2.24917700 -2.42328400  
O -1.79954000 0.92443400 -2.15813600  
C -3.26176900 2.50119200 -1.17720300  
O -2.71894000 1.58710800 -0.18084700  
C -3.03713700 2.21721100 -3.77818300  
H -3.49409300 3.18617600 -4.00741700  
H -2.30913300 1.99364600 -4.56376700  
H -3.81048900 1.44846200 -3.81043800  
C -1.12844100 3.20232900 -2.49615800  
H -0.44681400 2.84936400 -3.27579400  
H -1.43549100 4.22282600 -2.74717600  
H -0.58294000 3.22563600 -1.55060900  
C -3.21315300 3.91774200 -0.60421600  
H -3.57167300 4.64888400 -1.33738600

|                                    |             |             |             |    |             |             |             |
|------------------------------------|-------------|-------------|-------------|----|-------------|-------------|-------------|
| H                                  | -3.86428700 | 3.97596800  | 0.27335300  | C  | 3.42830400  | 0.83449000  | 0.17209400  |
| H                                  | -2.20565300 | 4.19626600  | -0.29306900 | C  | 3.49486200  | -0.52047600 | 0.14392800  |
| C                                  | -4.72089000 | 2.10241500  | -1.43261600 | N  | 2.18406900  | -0.97916400 | 0.05989900  |
| H                                  | -5.28297700 | 2.17362900  | -0.49820200 | N  | 2.07893000  | 1.16577600  | 0.10443900  |
| H                                  | -5.19135900 | 2.76652300  | -2.16466800 | C  | 1.74155200  | -2.99815600 | -1.26426600 |
| H                                  | -4.79267900 | 1.07334100  | -1.79045400 | C  | 1.82248900  | -2.37720300 | -0.00200700 |
| H                                  | 4.04457400  | -5.20791000 | -1.40678700 | C  | 1.57324500  | -3.06643900 | 1.20115500  |
| H                                  | -0.43403500 | 6.12319500  | 1.42062000  | C  | 1.23796500  | -4.42304300 | 1.11047000  |
| C                                  | 4.15370200  | 4.45313200  | -0.07705000 | C  | 1.15254800  | -5.06319200 | -0.12225400 |
| H                                  | 3.90052900  | 5.51844000  | -0.10013500 | C  | 1.40055000  | -4.35581700 | -1.29501300 |
| H                                  | 4.45299700  | 4.20750500  | 0.94693000  | H  | 1.03447700  | -4.98181700 | 2.01892800  |
| H                                  | 5.02129500  | 4.30207800  | -0.72834500 | H  | 1.32120900  | -4.86263000 | -2.25184900 |
| C                                  | 2.60677300  | 3.90671800  | -2.00994600 | C  | 1.41007500  | 3.17797100  | -1.13321400 |
| H                                  | 2.28158900  | 4.94537700  | -2.13114200 | C  | 0.93275200  | 4.49400800  | -1.10550400 |
| H                                  | 3.48075500  | 3.75887200  | -2.65374000 | C  | 0.63981900  | 5.12872200  | 0.09803900  |
| H                                  | 1.80420000  | 3.25917100  | -2.37064400 | C  | 0.81717900  | 4.45611700  | 1.30366400  |
| C                                  | 3.52015900  | -0.55134000 | -3.37124300 | C  | 1.29104700  | 3.13896600  | 1.33578600  |
| H                                  | 3.78008400  | 0.38621000  | -3.87443400 | C  | 1.58122200  | 2.52291700  | 0.10238100  |
| H                                  | 3.92379900  | -1.37121800 | -3.97456500 | H  | 0.78295300  | 5.02487600  | -2.04076900 |
| H                                  | 2.43061700  | -0.64277500 | -3.36590900 | H  | 0.57690400  | 4.95737400  | 2.23644100  |
| C                                  | 5.61814700  | -0.35763300 | -1.95462900 | Cu | -0.67693700 | -0.03830800 | -0.04170900 |
| H                                  | 6.02657700  | -0.30892100 | -0.93998100 | H  | 4.33728600  | -1.19283400 | 0.17417700  |
| H                                  | 6.12069600  | -1.17963400 | -2.47564600 | H  | 4.20089800  | 1.58428800  | 0.23173300  |
| H                                  | 5.87891200  | 0.57342500  | -2.46960700 | C  | 1.63398900  | -2.39165200 | 2.56760900  |
| C                                  | 0.81301000  | -3.69845200 | 2.22117800  | H  | 1.94565300  | -1.35389000 | 2.41968100  |
| H                                  | 0.34922600  | -3.62372600 | 3.21065700  | C  | 1.97704700  | -2.24701100 | -2.57104100 |
| H                                  | 0.11274100  | -3.29671100 | 1.48547000  | H  | 2.30285000  | -1.23230400 | -2.32548500 |
| H                                  | 0.97037900  | -4.76227100 | 2.00998300  | C  | 1.44748600  | 2.42212900  | 2.67309600  |
| C                                  | 3.10728200  | -3.42459400 | 3.29079700  | H  | 1.88392200  | 1.43788500  | 2.48149100  |
| H                                  | 3.37588200  | -4.47411400 | 3.12840000  | C  | 1.69463500  | 2.50304700  | -2.47147400 |
| H                                  | 4.03575500  | -2.84350900 | 3.30929700  | H  | 2.12107500  | 1.51655300  | -2.26907200 |
| H                                  | 2.64190100  | -3.35008600 | 4.27935400  | B  | -2.66944700 | -0.11905100 | -0.08455000 |
| C                                  | -1.71276400 | 1.75136200  | 3.35417400  | C  | -4.85052300 | -0.60915400 | 0.55166800  |
| H                                  | -2.01091300 | 2.62007700  | 3.95279800  | O  | -3.48309300 | -0.44420300 | 1.00451400  |
| H                                  | -2.28402100 | 1.74624500  | 2.42266100  | C  | -4.85944500 | 0.21300800  | -0.78762400 |
| H                                  | -1.98334900 | 0.85798700  | 3.92304900  | O  | -3.47034100 | 0.14722000  | -1.19814900 |
| C                                  | 0.60179900  | 1.78961100  | 4.38746700  | C  | -5.79018200 | -0.09589600 | 1.64344400  |
| H                                  | 0.30264300  | 0.96912200  | 5.04847000  | H  | -6.83771900 | -0.15660000 | 1.32647500  |
| H                                  | 1.67934000  | 1.70431400  | 4.21385600  | H  | -5.67422100 | -0.70869700 | 2.54271700  |
| H                                  | 0.42114700  | 2.73214800  | 4.91710100  | H  | -5.56664500 | 0.93798600  | 1.91289400  |
|                                    |             |             |             | C  | -5.07322000 | -2.11523700 | 0.34160600  |
|                                    |             |             |             | H  | -4.84819600 | -2.63833100 | 1.27561000  |
|                                    |             |             |             | H  | -6.10686200 | -2.34238900 | 0.05960900  |
|                                    |             |             |             | H  | -4.40552300 | -2.50525300 | -0.43135900 |
| <b>L<sub>3</sub>-6<sub>3</sub></b> |             |             |             |    |             |             |             |
| C                                  | 1.28821800  | 0.05300000  | 0.03446100  |    |             |             |             |

|   |             |             |             |    |             |             |             |
|---|-------------|-------------|-------------|----|-------------|-------------|-------------|
| C | -5.72588100 | -0.36539600 | -1.90706000 |    |             |             |             |
| H | -6.78373500 | -0.38487100 | -1.62069600 | C  | 1.67279400  | 1.16855300  | 0.22490100  |
| H | -5.63028800 | 0.25750700  | -2.80173500 | C  | 2.51946100  | 3.19894900  | 0.82944900  |
| H | -5.41763000 | -1.37865900 | -2.17120600 | C  | 3.49906100  | 2.28006500  | 1.02257800  |
| C | -5.19571900 | 1.69904700  | -0.58628600 | N  | 2.96601700  | 1.04971600  | 0.65404100  |
| H | -4.97944000 | 2.23786300  | -1.51337100 | N  | 1.41538300  | 2.50577700  | 0.34584700  |
| H | -6.25127600 | 1.85181000  | -0.33715500 | C  | 4.33982200  | -0.68725900 | -0.41768500 |
| H | -4.58202200 | 2.13503500  | 0.20654300  | C  | 3.69445900  | -0.19671300 | 0.73574100  |
| H | 0.88709000  | -6.11554900 | -0.16957500 | C  | 3.74898800  | -0.86089100 | 1.97804200  |
| H | 0.26806900  | 6.14948100  | 0.09624100  | C  | 4.48845100  | -2.04816100 | 2.04425200  |
| C | 0.66923200  | -2.12248600 | -3.37781700 | C  | 5.13867100  | -2.55441300 | 0.92281800  |
| H | 0.28867300  | -3.10679100 | -3.67186000 | C  | 5.06161100  | -1.88063200 | -0.29252500 |
| H | -0.10857200 | -1.62126000 | -2.79369800 | H  | 4.55138300  | -2.58359600 | 2.98680000  |
| H | 0.83947700  | -1.54317400 | -4.29203600 | H  | 5.57029000  | -2.28585700 | -1.16147500 |
| C | 3.09505400  | -2.89172400 | -3.41256200 | C  | -0.06800400 | 3.55357500  | -1.30761500 |
| H | 4.03416800  | -2.95360800 | -2.85276000 | C  | -1.30160900 | 4.15095000  | -1.59536800 |
| H | 2.83002300  | -3.90552100 | -3.73083100 | C  | -2.26977600 | 4.31473300  | -0.61002200 |
| H | 3.27705200  | -2.30089000 | -4.31661400 | C  | -2.02037600 | 3.89303200  | 0.69292400  |
| C | 0.39168300  | 2.28249900  | -3.26516500 | C  | -0.80541500 | 3.29100900  | 1.03945000  |
| H | 0.60116700  | 1.75429700  | -4.20193200 | C  | 0.15211500  | 3.12769700  | 0.01679500  |
| H | -0.32608700 | 1.69021400  | -2.68954400 | H  | -1.50672400 | 4.48496600  | -2.60801100 |
| H | -0.08490400 | 3.23577300  | -3.51850600 | H  | -2.78719100 | 4.02082700  | 1.44946800  |
| C | 2.73145100  | 3.28503900  | -3.30024800 | Cu | 0.58348600  | -0.23713500 | -0.62139300 |
| H | 2.36387400  | 4.27921800  | -3.57540800 | H  | 4.50943900  | 2.38196100  | 1.38470800  |
| H | 3.66861300  | 3.41750300  | -2.74949900 | H  | 2.50444100  | 4.26559000  | 0.98554900  |
| H | 2.95623700  | 2.74935100  | -4.22875200 | C  | 3.05294100  | -0.33294200 | 3.22970400  |
| C | 2.40924200  | 3.17070600  | 3.61556800  | H  | 2.45982500  | 0.54064200  | 2.94580100  |
| H | 3.39440200  | 3.30771900  | 3.15745900  | C  | 4.30961100  | 0.04270500  | -1.75723100 |
| H | 2.02589300  | 4.16135800  | 3.88189200  | H  | 3.56703000  | 0.84211100  | -1.68917500 |
| H | 2.54268200  | 2.60855400  | 4.54599000  | C  | -0.53923200 | 2.87655100  | 2.48414600  |
| C | 0.07670100  | 2.18911800  | 3.33874700  | H  | 0.32551100  | 2.20638100  | 2.48667200  |
| H | -0.41615200 | 3.13801300  | 3.57743300  | C  | 0.96986100  | 3.39254800  | -2.41414600 |
| H | -0.58814600 | 1.61859800  | 2.68287800  | H  | 1.85396100  | 2.91397700  | -1.98373400 |
| H | 0.19802100  | 1.63161700  | 4.27406500  | C  | -3.62260700 | -0.81520800 | 0.80895000  |
| C | 0.24284600  | -2.35703200 | 3.23085700  | N  | -3.66366600 | -1.03017900 | 2.07541000  |
| H | -0.48687700 | -1.84985200 | 2.59249000  | C  | -2.93339200 | -2.09613600 | 2.63713300  |
| H | -0.12885600 | -3.36794900 | 3.43087200  | C  | -3.42583900 | -2.63458800 | 3.83797800  |
| H | 0.29144900  | -1.82478100 | 4.18727800  | C  | -1.74215700 | -2.61947800 | 2.09652800  |
| C | 2.67779300  | -3.05579300 | 3.48599300  | C  | -2.77346400 | -3.69392700 | 4.46478100  |
| H | 2.41646300  | -4.09582500 | 3.70843700  | H  | -4.33361800 | -2.20830000 | 4.25377400  |
| H | 3.67330200  | -3.05362200 | 3.02974500  | C  | -1.08903000 | -3.67261900 | 2.73607700  |
| H | 2.74006900  | -2.52045600 | 4.43947200  | H  | -1.32291200 | -2.19879300 | 1.18716400  |
|   |             |             |             | C  | -1.60075800 | -4.21907300 | 3.91656000  |
|   |             |             |             | H  | -3.17658800 | -4.10548100 | 5.38621200  |

L<sub>3</sub>-7<sub>3</sub>

|   |             |             |             |                                      |             |             |             |
|---|-------------|-------------|-------------|--------------------------------------|-------------|-------------|-------------|
| H | -0.17047200 | -4.06638600 | 2.30868600  | H                                    | -2.59525400 | 2.73590100  | 3.24446700  |
| H | -1.08495600 | -5.03887500 | 4.40848300  | H                                    | -2.00452400 | 1.23992900  | 2.51258000  |
| B | -0.30615700 | -1.66771800 | -1.69851200 | H                                    | -1.42463300 | 1.74139700  | 4.10779000  |
| C | -1.78831000 | -3.28465000 | -2.49698600 | C                                    | -0.17773000 | 4.10789100  | 3.34128300  |
| O | -1.65110700 | -2.07004800 | -1.70598500 | H                                    | 0.69691000  | 4.63465400  | 2.94586300  |
| C | -0.52786900 | -3.21208400 | -3.43035500 | H                                    | -1.00980200 | 4.82000000  | 3.37038500  |
| O | 0.39938900  | -2.43234500 | -2.63100700 | H                                    | 0.04488000  | 3.80784200  | 4.37104300  |
| C | -1.75096400 | -4.46618700 | -1.51628300 | C                                    | 3.87645000  | -0.87430500 | -2.91675700 |
| H | -2.53541300 | -4.33465600 | -0.76587000 | H                                    | 3.80677400  | -0.29100700 | -3.84170100 |
| H | -1.91813900 | -5.42169800 | -2.02415100 | H                                    | 4.60368400  | -1.67460000 | -3.09314300 |
| H | -0.79279300 | -4.51307500 | -0.99206800 | H                                    | 2.90127900  | -1.33257300 | -2.72879600 |
| C | -3.13707500 | -3.25099200 | -3.21503000 | C                                    | 5.67429600  | 0.70069800  | -2.04753700 |
| H | -3.25092700 | -2.34937600 | -3.82000900 | H                                    | 5.96136900  | 1.39915000  | -1.25422400 |
| H | -3.25774300 | -4.12400200 | -3.86624000 | H                                    | 6.46665600  | -0.05137100 | -2.13092300 |
| H | -3.94689000 | -3.26755100 | -2.47929200 | H                                    | 5.63912500  | 1.25569000  | -2.99133400 |
| C | 0.12123600  | -4.55690500 | -3.75765500 | C                                    | 1.41601100  | 4.75943800  | -2.96955700 |
| H | -0.56682500 | -5.20345800 | -4.31402200 | H                                    | 0.58471000  | 5.29227300  | -3.44353300 |
| H | 1.00704100  | -4.39358600 | -4.37901800 | H                                    | 1.81437000  | 5.40299900  | -2.17816000 |
| H | 0.43766900  | -5.08027000 | -2.85393500 | H                                    | 2.19815300  | 4.62726200  | -3.72494900 |
| C | -0.77316600 | -2.42396600 | -4.72629800 | C                                    | 0.45864400  | 2.47175800  | -3.53871000 |
| H | -1.23709000 | -1.45665200 | -4.51552900 | H                                    | 0.18810800  | 1.48687200  | -3.14564200 |
| H | 0.18883100  | -2.23754400 | -5.21238300 | H                                    | -0.42222800 | 2.89517500  | -4.03353700 |
| H | -1.41123600 | -2.97346300 | -5.42627900 | H                                    | 1.23448600  | 2.33548900  | -4.30029100 |
| C | -4.35439000 | 0.29789800  | 0.18808700  | H                                    | -3.22637900 | 4.76466500  | -0.85770700 |
| C | -5.20345000 | 1.13529100  | 0.93352300  | H                                    | 5.70572600  | -3.47823000 | 0.99548700  |
| C | -4.21212000 | 0.51677000  | -1.19219400 |                                      |             |             |             |
| C | -5.89678100 | 2.16570100  | 0.30721700  | <b>L<sub>3</sub>-TS8<sub>3</sub></b> |             |             |             |
| H | -5.30730800 | 0.94888300  | 1.99743800  | C                                    | 0.55928600  | -1.44692800 | -0.16269000 |
| C | -4.90661900 | 1.55378200  | -1.81581100 | C                                    | 1.84496400  | -3.30840000 | -0.47894100 |
| H | -3.54829400 | -0.12920000 | -1.76065000 | C                                    | 0.55708900  | -3.71687600 | -0.41069600 |
| C | -5.75150700 | 2.37771800  | -1.06971000 | N                                    | -0.21834500 | -2.57476000 | -0.22769300 |
| H | -6.55895600 | 2.80370500  | 0.88661700  | N                                    | 1.83574000  | -1.92584800 | -0.32396500 |
| H | -4.79137900 | 1.71636800  | -2.88386100 | C                                    | -2.26668000 | -2.80437500 | -1.54035100 |
| H | -6.30044900 | 3.17931800  | -1.55688800 | C                                    | -1.66238700 | -2.63342800 | -0.27677300 |
| H | -3.05259000 | -1.44491000 | 0.11517200  | C                                    | -2.40020200 | -2.60476000 | 0.92433700  |
| C | 2.07754700  | -1.36450000 | 3.82620000  | C                                    | -3.78945900 | -2.75388600 | 0.82518100  |
| H | 2.60012200  | -2.26180900 | 4.17454100  | C                                    | -4.41302300 | -2.93095100 | -0.40714200 |
| H | 1.55408400  | -0.93475300 | 4.68680900  | C                                    | -3.65891100 | -2.95290700 | -1.57592700 |
| H | 1.32553200  | -1.67388400 | 3.09551600  | H                                    | -4.38973700 | -2.73575100 | 1.72779600  |
| C | 4.08014700  | 0.12986500  | 4.28246700  | H                                    | -4.15622100 | -3.08645100 | -2.53196700 |
| H | 4.70661700  | -0.70318400 | 4.61930100  | C                                    | 3.43113700  | -0.60020400 | -1.63931400 |
| H | 4.74464500  | 0.90362900  | 3.88381200  | C                                    | 4.67684400  | 0.03501100  | -1.71245900 |
| H | 3.57018900  | 0.54039600  | 5.16056100  | C                                    | 5.51158400  | 0.11469300  | -0.60253100 |
| C | -1.71091200 | 2.10303900  | 3.11449400  |                                      |             |             |             |

|    |             |             |             |   |             |             |             |
|----|-------------|-------------|-------------|---|-------------|-------------|-------------|
| C  | 5.10701300  | -0.42289200 | 0.61594700  | H | -2.42785900 | 3.10855500  | -4.12232500 |
| C  | 3.86941300  | -1.06406200 | 0.75075900  | H | -2.99621400 | 1.48290200  | -3.72600000 |
| C  | 3.05514500  | -1.15121800 | -0.39701400 | C | -2.74404800 | 4.32489800  | -1.75884100 |
| H  | 4.99645800  | 0.47004200  | -2.65411100 | H | -2.45075500 | 4.56409700  | -0.73299500 |
| H  | 5.76210900  | -0.34518400 | 1.47767200  | H | -2.02972300 | 4.80165700  | -2.43592500 |
| Cu | 0.10798400  | 0.36453300  | 0.24589700  | H | -3.73017200 | 4.76195000  | -1.94308800 |
| H  | 0.11441600  | -4.69662600 | -0.48622700 | C | 1.22741800  | 3.03356100  | 0.05570600  |
| H  | 2.76076800  | -3.85746200 | -0.62443000 | C | 2.54886600  | 2.69108800  | 0.37775000  |
| C  | -1.72785200 | -2.48112800 | 2.28908700  | C | 1.01817400  | 4.06488600  | -0.87381100 |
| H  | -0.79580700 | -1.92438400 | 2.15368000  | C | 3.62436400  | 3.34461900  | -0.22659000 |
| C  | -1.47370800 | -2.84214800 | -2.84678800 | H | 2.71223600  | 1.92854400  | 1.12863400  |
| H  | -0.40961500 | -2.78598400 | -2.60520400 | C | 2.09172900  | 4.72223600  | -1.47246300 |
| C  | 3.46295800  | -1.65941100 | 2.09564600  | H | 0.00694500  | 4.35595000  | -1.12975800 |
| H  | 2.39386800  | -1.88702000 | 2.05247400  | C | 3.40345200  | 4.36171700  | -1.15533300 |
| C  | 2.56174200  | -0.69890100 | -2.88941900 | H | 4.63836800  | 3.06139000  | 0.04104600  |
| H  | 1.59255100  | -1.11121100 | -2.59740200 | H | 1.90254700  | 5.52387000  | -2.18178100 |
| C  | 0.06101200  | 2.37052400  | 0.77145200  | H | 4.24106000  | 4.87717900  | -1.61773200 |
| N  | 0.44990100  | 1.60676000  | 1.88809000  | H | -0.72923800 | 3.11524900  | 0.94800900  |
| C  | -0.36957600 | 1.54674400  | 3.00878100  | C | -2.56714500 | -1.69933500 | 3.31202000  |
| C  | 0.13163100  | 0.85386800  | 4.14218800  | H | -3.46418600 | -2.25167100 | 3.61512700  |
| C  | -1.64034400 | 2.15992300  | 3.15845900  | H | -1.97431800 | -1.51535800 | 4.21121400  |
| C  | -0.56712900 | 0.80386200  | 5.34139400  | H | -2.86992400 | -0.72410500 | 2.92268800  |
| H  | 1.10331800  | 0.37934700  | 4.05525400  | C | -1.36560300 | -3.87788000 | 2.83891700  |
| C  | -2.33331700 | 2.10482800  | 4.36886100  | H | -2.26685000 | -4.48397700 | 2.98615000  |
| H  | -2.10497900 | 2.66403500  | 2.31924300  | H | -0.70049700 | -4.42514600 | 2.16314500  |
| C  | -1.81131500 | 1.43385200  | 5.47502400  | H | -0.86061200 | -3.78472000 | 3.80619600  |
| H  | -0.13269000 | 0.27618200  | 6.18818400  | C | 3.66201900  | -0.66460300 | 3.25329900  |
| H  | -3.30257400 | 2.59428900  | 4.44146600  | H | 4.71978700  | -0.43412300 | 3.41971800  |
| H  | -2.35506100 | 1.40052000  | 6.41454700  | H | 3.12984200  | 0.27054000  | 3.06194100  |
| B  | -1.31403000 | 1.75781800  | -0.53449700 | H | 3.27436500  | -1.09381400 | 4.18327800  |
| C  | -3.58080900 | 1.99152300  | -0.94948400 | C | 4.21738200  | -2.97632000 | 2.37140200  |
| O  | -2.57012000 | 1.61202100  | 0.02835000  | H | 4.03536500  | -3.72134800 | 1.59025500  |
| C  | -2.74307900 | 2.81102300  | -2.01175700 | H | 5.29844700  | -2.80588700 | 2.42365300  |
| O  | -1.37913400 | 2.33953400  | -1.78259600 | H | 3.89867200  | -3.40648600 | 3.32689900  |
| C  | -4.18669400 | 0.69819700  | -1.50037300 | C | -1.79126800 | -1.63032200 | -3.74409900 |
| H  | -4.59802800 | 0.11805200  | -0.67110800 | H | -1.20475700 | -1.67895800 | -4.66832000 |
| H  | -4.99216400 | 0.90331500  | -2.21287300 | H | -2.85009300 | -1.60526700 | -4.02459300 |
| H  | -3.43265900 | 0.08095600  | -1.99022500 | H | -1.54749300 | -0.69105600 | -3.23890500 |
| C  | -4.66213700 | 2.79028600  | -0.21892900 | C | -1.69383100 | -4.16524600 | -3.60593700 |
| H  | -4.24884000 | 3.65342700  | 0.30566100  | H | -1.44623200 | -5.03094500 | -2.98304000 |
| H  | -5.43052400 | 3.14105800  | -0.91650500 | H | -2.73349000 | -4.27809900 | -3.93071600 |
| H  | -5.14610700 | 2.14836200  | 0.52227300  | H | -1.06319000 | -4.19986300 | -4.50067800 |
| C  | -3.09904500 | 2.53915000  | -3.47289700 | C | 3.18437700  | -1.66253900 | -3.91969400 |
| H  | -4.12595300 | 2.85196200  | -3.69018200 | H | 4.16025200  | -1.30195100 | -4.26281400 |



|                                    |             |             |             |   |             |             |             |
|------------------------------------|-------------|-------------|-------------|---|-------------|-------------|-------------|
| H                                  | 3.32891300  | -2.66292400 | -3.49809600 | N | 1.05068700  | -0.99732900 | 1.50646900  |
| H                                  | 2.53582200  | -1.75536500 | -4.79770900 | C | 1.39265100  | -0.50666100 | 2.75236300  |
| C                                  | 2.28837600  | 0.68312700  | -3.51218900 | C | 0.57907800  | 0.49903000  | 3.34966900  |
| H                                  | 1.83288600  | 1.36351500  | -2.78802200 | C | 2.50927600  | -0.93110500 | 3.52519700  |
| H                                  | 3.20671500  | 1.15050400  | -3.88302700 | C | 0.84448600  | 1.02008600  | 4.60943000  |
| H                                  | 1.60507200  | 0.58077600  | -4.36210200 | H | -0.29003200 | 0.84912100  | 2.79608600  |
| H                                  | 6.47864600  | 0.60293500  | -0.68512900 | C | 2.75829300  | -0.40394000 | 4.79275600  |
| H                                  | -5.49176600 | -3.05145000 | -0.45541300 | H | 3.21398000  | -1.64498600 | 3.11938200  |
| <b>L<sub>3</sub>-9<sub>3</sub></b> |             |             |             | C | 1.93866100  | 0.57244800  | 5.35906200  |
| C                                  | -1.57720600 | 0.93383500  | -0.42140800 | H | 0.18030100  | 1.78010900  | 5.01665300  |
| C                                  | -3.57920300 | 1.80387500  | -1.08156100 | H | 3.62649500  | -0.76373200 | 5.34174200  |
| C                                  | -2.61542700 | 2.68077200  | -1.45705500 | H | 2.14414000  | 0.97528100  | 6.34618300  |
| N                                  | -1.40320300 | 2.13896000  | -1.04691300 | B | 3.06971400  | -1.65432900 | 0.23055200  |
| N                                  | -2.93288600 | 0.74520300  | -0.45478100 | C | 5.17496300  | -0.76995300 | 0.07312700  |
| C                                  | 0.55109800  | 2.42807300  | -2.49964100 | O | 4.29583300  | -1.61805100 | 0.85705000  |
| C                                  | -0.12886100 | 2.76912300  | -1.31274200 | C | 4.52349800  | -0.86212900 | -1.35700400 |
| C                                  | 0.35489000  | 3.73423100  | -0.40622500 | O | 3.12280100  | -1.11688000 | -1.04248700 |
| C                                  | 1.56499000  | 4.36379200  | -0.72289100 | C | 5.09772300  | 0.63526100  | 0.68635400  |
| C                                  | 2.25805100  | 4.04930600  | -1.88834900 | H | 5.35853300  | 0.57230700  | 1.74581400  |
| C                                  | 1.75477800  | 3.09231500  | -2.76511300 | H | 5.78937500  | 1.32860700  | 0.19755800  |
| H                                  | 1.96755000  | 5.11229500  | -0.04811800 | H | 4.08511900  | 1.04194200  | 0.61865400  |
| H                                  | 2.30309300  | 2.85741900  | -3.67199600 | C | 6.59790500  | -1.31535500 | 0.18050800  |
| C                                  | -3.92662800 | -1.45108900 | -0.89201500 | H | 6.65305300  | -2.36633100 | -0.10989100 |
| C                                  | -4.62907700 | -2.56415900 | -0.41420200 | H | 7.28622200  | -0.74096900 | -0.44888500 |
| C                                  | -5.01679400 | -2.65170200 | 0.91917400  | H | 6.94107800  | -1.23491400 | 1.21584700  |
| C                                  | -4.71653900 | -1.62015000 | 1.80458800  | C | 4.62275800  | 0.41266900  | -2.19136200 |
| C                                  | -4.01883900 | -0.48161100 | 1.38337500  | H | 5.67131400  | 0.68165200  | -2.36000900 |
| C                                  | -3.62823400 | -0.42743900 | 0.02975800  | H | 4.15537900  | 0.25415600  | -3.16731000 |
| H                                  | -4.87304400 | -3.37158600 | -1.09729500 | H | 4.11835600  | 1.25055700  | -1.70789500 |
| H                                  | -5.03265000 | -1.69700800 | 2.83967400  | C | 5.01904200  | -2.06462000 | -2.17218100 |
| Cu                                 | -0.24925900 | -0.11399500 | 0.45438300  | H | 4.96399000  | -2.98804900 | -1.58902300 |
| H                                  | -2.67452700 | 3.62579800  | -1.97206500 | H | 4.38355800  | -2.18097100 | -3.05478400 |
| H                                  | -4.65004300 | 1.82851000  | -1.20182700 | H | 6.05123700  | -1.92775600 | -2.50892400 |
| C                                  | -0.40766200 | 4.13837600  | 0.85247300  | C | 0.85850100  | -3.14229800 | 0.24667600  |
| H                                  | -1.19316000 | 3.39617900  | 1.02309200  | C | -0.32890400 | -3.56493500 | 0.86885100  |
| C                                  | 0.00736700  | 1.40963500  | -3.49711500 | C | 1.19570100  | -3.71550200 | -0.98631800 |
| H                                  | -0.83937700 | 0.89976700  | -3.03023500 | C | -1.13748700 | -4.54171100 | 0.29109300  |
| C                                  | -3.76852000 | 0.66684100  | 2.35676900  | H | -0.60189700 | -3.12115300 | 1.82164300  |
| H                                  | -2.99777100 | 1.31204700  | 1.92521700  | C | 0.38754400  | -4.69749200 | -1.56955100 |
| C                                  | -3.55560100 | -1.36513900 | -2.37029400 | H | 2.09616500  | -3.39164000 | -1.49759700 |
| H                                  | -2.89662900 | -0.50294200 | -2.50510500 | C | -0.77772700 | -5.11960200 | -0.93095400 |
| C                                  | 1.78095200  | -2.17922600 | 0.98960600  | H | -2.04571300 | -4.85828700 | 0.79716100  |
|                                    |             |             |             | H | 0.67383800  | -5.13240400 | -2.52393500 |
|                                    |             |             |             | H | -1.40168900 | -5.88801400 | -1.37975600 |

|                                     |             |             |             |    |             |             |             |
|-------------------------------------|-------------|-------------|-------------|----|-------------|-------------|-------------|
| H                                   | 2.14627400  | -2.76178500 | 1.85065800  | C  | 1.47963500  | 2.85008800  | 0.89994000  |
| C                                   | 0.48130900  | 4.15108500  | 2.10913100  | C  | 1.34078500  | 3.70308500  | -0.21365700 |
| H                                   | 1.27362000  | 4.90399500  | 2.04136000  | C  | 0.39878400  | 4.73517700  | -0.12205400 |
| H                                   | -0.12421400 | 4.39785900  | 2.98782000  | C  | -0.37053400 | 4.90906000  | 1.02467100  |
| H                                   | 0.94506900  | 3.17716800  | 2.28606000  | C  | -0.21607100 | 4.04727400  | 2.10692100  |
| C                                   | -1.09487300 | 5.50551500  | 0.65259400  | H  | 0.26471400  | 5.40734100  | -0.96384300 |
| H                                   | -0.35559100 | 6.29475900  | 0.47711300  | H  | -0.82561100 | 4.18786400  | 2.99435000  |
| H                                   | -1.77787600 | 5.49471600  | -0.20330200 | C  | 3.44418800  | -2.49972300 | 1.14898200  |
| H                                   | -1.67242700 | 5.77817000  | 1.54237800  | C  | 3.70751100  | -3.82432500 | 0.77805800  |
| C                                   | -3.24540200 | 0.19470500  | 3.72486300  | C  | 4.13922900  | -4.14105300 | -0.50666300 |
| H                                   | -3.98663800 | -0.40579400 | 4.26278000  | C  | 4.31714200  | -3.13522700 | -1.45200200 |
| H                                   | -2.33079800 | -0.39520800 | 3.62445000  | C  | 4.07500300  | -1.79283600 | -1.13607100 |
| H                                   | -3.01543300 | 1.06160300  | 4.35283500  | C  | 3.64114800  | -1.50211000 | 0.17304600  |
| C                                   | -5.04635700 | 1.51666600  | 2.52138900  | H  | 3.56557300  | -4.61810400 | 1.50492100  |
| H                                   | -5.39458900 | 1.91242600  | 1.56162700  | H  | 4.64419700  | -3.39504700 | -2.45413900 |
| H                                   | -5.85992900 | 0.92178700  | 2.95096200  | Cu | 0.55227900  | -0.15734400 | -0.21112600 |
| H                                   | -4.86022400 | 2.36463000  | 3.18940100  | H  | 4.17109000  | 2.86084100  | 1.62222600  |
| C                                   | 1.04094200  | 0.32442100  | -3.85036500 | H  | 5.38968400  | 0.39417600  | 1.21809400  |
| H                                   | 0.57641000  | -0.43943800 | -4.48349100 | C  | 2.16422500  | 3.54284800  | -1.48803700 |
| H                                   | 1.88554500  | 0.74034300  | -4.41131000 | H  | 2.79963000  | 2.66027900  | -1.37328100 |
| H                                   | 1.43532300  | -0.16338600 | -2.95488900 | C  | 0.85035700  | 2.07157600  | 3.27614200  |
| C                                   | -0.51728100 | 2.11085300  | -4.76676300 | H  | 1.58390700  | 1.29993300  | 3.02727400  |
| H                                   | -1.29682800 | 2.84271400  | -4.53051800 | C  | 4.26432200  | -0.71814400 | -2.20197100 |
| H                                   | 0.28818400  | 2.63966500  | -5.28809800 | H  | 4.08316000  | 0.25573900  | -1.73846800 |
| H                                   | -0.94054900 | 1.37759600  | -5.46171900 | C  | 2.96281000  | -2.19131800 | 2.56369000  |
| C                                   | -4.80938900 | -1.12416700 | -3.23608100 | H  | 2.74450200  | -1.12138400 | 2.62138100  |
| H                                   | -5.51337400 | -1.95956800 | -3.15539000 | C  | -2.21973200 | 0.24603400  | -0.75146700 |
| H                                   | -5.33998300 | -0.21440100 | -2.93624400 | N  | -1.12953000 | -0.74220500 | -0.75740100 |
| H                                   | -4.53201400 | -1.02182800 | -4.29080300 | C  | -1.42617300 | -2.05329700 | -1.07076700 |
| C                                   | -2.77992500 | -2.60159600 | -2.85704800 | C  | -2.67550800 | -2.48913300 | -1.58736700 |
| H                                   | -1.88250400 | -2.77509900 | -2.25897600 | C  | -0.44172800 | -3.06228900 | -0.88428200 |
| H                                   | -3.39120300 | -3.50922000 | -2.81138300 | C  | -2.91557200 | -3.83651900 | -1.86682300 |
| H                                   | -2.47831600 | -2.46447000 | -3.90136300 | H  | -3.45326100 | -1.76692800 | -1.80908600 |
| H                                   | -5.55981100 | -3.52485200 | 1.26985700  | C  | -0.69096200 | -4.39618000 | -1.17387900 |
| H                                   | 3.19318500  | 4.55370400  | -2.11507400 | H  | 0.52929800  | -2.76824000 | -0.49054100 |
|                                     |             |             |             | C  | -1.93707800 | -4.80887700 | -1.66469800 |
|                                     |             |             |             | H  | -3.88721300 | -4.12088400 | -2.26590300 |
|                                     |             |             |             | H  | 0.09693600  | -5.12791200 | -1.00703300 |
|                                     |             |             |             | H  | -2.13120100 | -5.85356700 | -1.88831200 |
|                                     |             |             |             | B  | -3.42546600 | -0.20158000 | 0.19625100  |
|                                     |             |             |             | C  | -4.45980900 | -0.73923900 | 2.16977000  |
|                                     |             |             |             | O  | -3.19237400 | -0.68148300 | 1.46469300  |
|                                     |             |             |             | C  | -5.51293600 | -0.71211000 | 0.99009100  |
|                                     |             |             |             | O  | -4.76509100 | -0.06723300 | -0.07907900 |
| <b>L<sub>3</sub>-10<sub>3</sub></b> |             |             |             |    |             |             |             |
| C                                   | 2.20349000  | 0.52112900  | 0.39863000  |    |             |             |             |
| C                                   | 4.37842600  | 0.72552000  | 1.04549300  |    |             |             |             |
| C                                   | 3.78422200  | 1.92923000  | 1.24200100  |    |             |             |             |
| N                                   | 2.45950600  | 1.78894900  | 0.84345200  |    |             |             |             |
| N                                   | 3.40284000  | -0.12206300 | 0.53110400  |    |             |             |             |
| C                                   | 0.70954200  | 2.99709400  | 2.07157500  |    |             |             |             |



|   |             |             |             |   |             |             |             |
|---|-------------|-------------|-------------|---|-------------|-------------|-------------|
| H | 4.35828900  | 2.84900700  | 0.19248200  | C | -4.85185900 | -0.15577300 | -1.20831200 |
| C | 3.44214600  | -1.83659500 | 2.26807400  | C | -4.00936400 | 2.05509400  | -1.65805700 |
| H | 3.32928000  | -0.75124400 | 2.19737600  | C | -5.96404400 | 0.11465300  | -2.00477900 |
| C | 3.04758700  | -1.28614100 | -2.84416000 | H | -4.76041900 | -1.11374100 | -0.71045900 |
| H | 2.84243200  | -0.26050700 | -2.52496100 | C | -5.12591800 | 2.32984700  | -2.44923600 |
| C | 1.65609100  | 2.73153900  | 2.79544700  | H | -3.24525300 | 2.81798700  | -1.52371500 |
| H | 2.18358900  | 1.81567800  | 2.51366000  | C | -6.10845400 | 1.35567900  | -2.62999800 |
| C | 1.56718600  | 3.16899500  | -2.34212200 | H | -6.72697600 | -0.64882400 | -2.13391900 |
| H | 2.19953900  | 2.28346400  | -2.23411800 | H | -5.22619800 | 3.30246100  | -2.92461300 |
| C | -2.65040800 | 0.59292000  | -0.14496500 | H | -6.97896000 | 1.56165600  | -3.24707000 |
| N | -1.59345600 | -0.49011900 | -0.44245300 | H | -2.13360300 | 1.54357300  | 0.00219500  |
| C | -1.75752600 | -1.43576200 | -1.48184900 | H | 3.52655000  | -5.43377300 | -0.72565500 |
| C | -1.39367000 | -2.77899900 | -1.24372600 | H | -0.70247900 | 6.08358300  | 0.53170700  |
| C | -2.19313800 | -1.10528200 | -2.78413300 | C | 0.46992200  | 2.31429100  | 3.68565900  |
| C | -1.45519000 | -3.73907600 | -2.25171100 | H | 0.83950800  | 1.76791800  | 4.56075200  |
| H | -1.05882200 | -3.05319000 | -0.24900000 | H | -0.08058800 | 3.18606600  | 4.05641200  |
| C | -2.26513200 | -2.07454000 | -3.78475400 | H | -0.23218000 | 1.66914400  | 3.14946200  |
| H | -2.46671600 | -0.08194100 | -3.01083400 | C | 2.65138800  | 3.61750100  | 3.57213300  |
| C | -1.89863000 | -3.39846500 | -3.53215300 | H | 3.52335900  | 3.87660900  | 2.96200600  |
| H | -1.16527400 | -4.76352700 | -2.02986800 | H | 2.18144800  | 4.55341100  | 3.89352400  |
| H | -2.60533400 | -1.78551800 | -4.77641200 | H | 3.00680700  | 3.09775200  | 4.46831900  |
| H | -1.95712400 | -4.14803900 | -4.31618700 | C | 4.80099800  | -2.11290800 | 2.94102700  |
| B | -2.65985300 | -0.34577900 | 1.09744100  | H | 4.83517500  | -1.65223800 | 3.93400700  |
| C | -3.33214400 | -1.95840000 | 2.59756200  | H | 4.97565200  | -3.18670700 | 3.06703700  |
| O | -3.60347800 | -1.36364000 | 1.31380400  | H | 5.63053700  | -1.70894000 | 2.35131600  |
| C | -2.61487800 | -0.78061900 | 3.35919500  | C | 2.27679900  | -2.35607700 | 3.13122300  |
| O | -1.93407100 | -0.09056800 | 2.29034900  | H | 2.33163500  | -3.44095800 | 3.27117400  |
| C | -4.66168200 | -2.41147900 | 3.20308200  | H | 2.30103200  | -1.89101100 | 4.12252400  |
| H | -5.08498700 | -3.21645400 | 2.59451400  | H | 1.31316300  | -2.12276200 | 2.66950500  |
| H | -4.52445900 | -2.79373700 | 4.22072200  | C | 1.86739700  | -1.72733900 | -3.72975000 |
| H | -5.38652100 | -1.59587200 | 3.22877700  | H | 1.76095100  | -1.04071600 | -4.57645900 |
| C | -2.41778500 | -3.17520300 | 2.38696800  | H | 2.02189400  | -2.73032700 | -4.14124000 |
| H | -1.44541700 | -2.87048300 | 1.99215000  | H | 0.92490100  | -1.73503400 | -3.17626800 |
| H | -2.25821800 | -3.73121900 | 3.31684200  | C | 4.36605300  | -1.26521300 | -3.64429500 |
| H | -2.88419100 | -3.84430000 | 1.65869000  | H | 5.20130800  | -0.90160900 | -3.03633200 |
| C | -3.60963700 | 0.21008600  | 3.98803700  | H | 4.62750700  | -2.26639100 | -4.00399000 |
| H | -4.12133400 | -0.21657900 | 4.85702200  | H | 4.27220100  | -0.61094700 | -4.51767400 |
| H | -3.06311900 | 1.09997900  | 4.31388400  | C | 2.40255700  | 4.23953300  | -3.07172400 |
| H | -4.36254800 | 0.52289900  | 3.25948600  | H | 1.82518900  | 5.15518400  | -3.23801100 |
| C | -1.59209500 | -1.21697200 | 4.40822300  | H | 3.29623300  | 4.50994600  | -2.49958900 |
| H | -0.79212800 | -1.81356200 | 3.96666900  | H | 2.72528900  | 3.86867400  | -4.05037500 |
| H | -1.13846000 | -0.33568200 | 4.87231500  | C | 0.34127100  | 2.75237200  | -3.17790000 |
| H | -2.06865500 | -1.80513100 | 5.20044800  | H | -0.33075400 | 3.59922300  | -3.35383200 |
| C | -3.84706700 | 0.81153300  | -1.02416600 | H | 0.65927100  | 2.37316200  | -4.15505800 |

|                                     |             |             |             |   |             |             |             |
|-------------------------------------|-------------|-------------|-------------|---|-------------|-------------|-------------|
| H                                   | -0.23083400 | 1.96573400  | -2.67703200 | H | -1.90401200 | 0.49357100  | -2.97762700 |
|                                     |             |             |             | C | -2.03931900 | -2.77237500 | -3.93912200 |
| <b>L<sub>3</sub>-12<sub>3</sub></b> |             |             |             | H | -1.97441900 | -4.44799300 | -2.58273100 |
|                                     |             |             |             | H | -2.09640900 | -0.90080300 | -5.01102900 |
| C                                   | 2.05807300  | 0.44511100  | 0.05814100  | H | -2.12772800 | -3.38576600 | -4.83129200 |
| C                                   | 3.96871100  | 1.63549900  | 0.38581300  | B | -2.50603200 | -0.47841300 | 0.87466000  |
| C                                   | 4.32941500  | 0.35175100  | 0.13248700  | C | -3.50786300 | -2.04045800 | 2.27928800  |
| N                                   | 3.15282900  | -0.36121300 | -0.06465300 | O | -3.57462300 | -1.42795300 | 0.98640100  |
| N                                   | 2.58063200  | 1.67581000  | 0.33587300  | C | -2.69207700 | -0.98076000 | 3.11530000  |
| C                                   | 3.13057600  | -2.19666500 | -1.69767300 | O | -1.78333300 | -0.46134600 | 2.13207600  |
| C                                   | 3.10256700  | -1.77800500 | -0.35236800 | C | -4.93668700 | -2.29173800 | 2.76880200  |
| C                                   | 3.04019900  | -2.68086200 | 0.72755400  | H | -5.42321600 | -3.02590000 | 2.11867000  |
| C                                   | 2.99139900  | -4.04662500 | 0.42188100  | H | -4.94524300 | -2.68796900 | 3.79074900  |
| C                                   | 3.01301600  | -4.49058700 | -0.89692500 | H | -5.53118400 | -1.37674800 | 2.74068500  |
| C                                   | 3.08573700  | -3.57462300 | -1.94230800 | C | -2.76633800 | -3.38275600 | 2.14994400  |
| H                                   | 2.93452400  | -4.77002400 | 1.22940200  | H | -1.72733100 | -3.22656700 | 1.84623600  |
| H                                   | 3.10287600  | -3.93293000 | -2.96668800 | H | -2.77185100 | -3.95141100 | 3.08624000  |
| C                                   | 1.48554800  | 3.67585600  | -0.57423800 | H | -3.26189100 | -3.98472800 | 1.38230100  |
| C                                   | 0.72601000  | 4.82983200  | -0.34617900 | C | -3.57879900 | 0.17370500  | 3.61816400  |
| C                                   | 0.30030100  | 5.17034200  | 0.93468400  | H | -4.25485300 | -0.14429400 | 4.41887000  |
| C                                   | 0.62801900  | 4.36106700  | 2.01853000  | H | -2.93628300 | 0.96858200  | 4.00922300  |
| C                                   | 1.38178400  | 3.19283500  | 1.85075400  | H | -4.17591900 | 0.59153300  | 2.80340500  |
| C                                   | 1.79513600  | 2.87287100  | 0.54193700  | C | -1.89463800 | -1.55835300 | 4.28565400  |
| H                                   | 0.46472200  | 5.46811800  | -1.18465000 | H | -1.16148400 | -2.29424400 | 3.95039500  |
| H                                   | 0.29004700  | 4.63561700  | 3.01276300  | H | -1.35589300 | -0.75616100 | 4.80040100  |
| Cu                                  | 0.22810800  | -0.00065800 | -0.14632500 | H | -2.55868500 | -2.03634400 | 5.01478800  |
| H                                   | 5.29795800  | -0.11843300 | 0.07726300  | C | -3.73865700 | 1.13887000  | -0.97540500 |
| H                                   | 4.55895800  | 2.51318300  | 0.59416100  | C | -4.74903300 | 0.22495300  | -1.33445100 |
| C                                   | 3.01869800  | -2.22925100 | 2.18481300  | C | -3.86072600 | 2.46231600  | -1.43817000 |
| H                                   | 3.14128900  | -1.14255900 | 2.20767100  | C | -5.82192500 | 0.62423400  | -2.13013400 |
| C                                   | 3.23051400  | -1.22235700 | -2.86760200 | H | -4.69564200 | -0.79236200 | -0.96534300 |
| H                                   | 3.12909600  | -0.20676500 | -2.47426600 | C | -4.94237300 | 2.86496800  | -2.22184100 |
| C                                   | 1.73685000  | 2.33984900  | 3.06463800  | H | -3.09317500 | 3.18575200  | -1.17024900 |
| H                                   | 2.24929100  | 1.44105700  | 2.70982800  | C | -5.92801900 | 1.94339600  | -2.57816000 |
| C                                   | 1.93597400  | 3.33498900  | -1.99170300 | H | -6.58782400 | -0.10052600 | -2.39470800 |
| H                                   | 2.53723300  | 2.42233900  | -1.94838300 | H | -5.01103100 | 3.89647000  | -2.55889000 |
| C                                   | -2.59809300 | 0.78716100  | -0.08846300 | H | -6.76985500 | 2.24922100  | -3.19358800 |
| N                                   | -1.62489700 | -0.39466400 | -0.44378700 | H | -2.00400800 | 1.66526500  | 0.16300000  |
| C                                   | -1.81324500 | -1.17872900 | -1.62172000 | H | 2.97331700  | -5.55475800 | -1.11113400 |
| C                                   | -1.84791800 | -2.58018500 | -1.52933700 | H | -0.28979000 | 6.06921700  | 1.08851400  |
| C                                   | -1.90769400 | -0.58806600 | -2.89450800 | C | 0.48423100  | 1.87275000  | 3.83077900  |
| C                                   | -1.95191500 | -3.36522400 | -2.67761700 | H | 0.78188600  | 1.23895400  | 4.67365500  |
| H                                   | -1.79538600 | -3.04030600 | -0.55006900 | H | -0.07394400 | 2.72090500  | 4.24262600  |
| C                                   | -2.02051400 | -1.37890400 | -4.03771600 | H | -0.19099300 | 1.29414400  | 3.19349200  |

|                                       |            |             |             |    |             |             |             |
|---------------------------------------|------------|-------------|-------------|----|-------------|-------------|-------------|
| C                                     | 2.71421600 | 3.08798100  | 3.99407300  | C  | 0.56547600  | 3.16826400  | -1.88432100 |
| H                                     | 3.62826400 | 3.38181500  | 3.46683700  | C  | -0.20028900 | 4.33375000  | -1.75423700 |
| H                                     | 2.25968100 | 3.99743900  | 4.40159100  | C  | -0.05030700 | 5.17668200  | -0.65713400 |
| H                                     | 2.99963500 | 2.45173600  | 4.83861900  | C  | 0.88055300  | 4.87601000  | 0.33334600  |
| C                                     | 4.19020800 | -2.83399000 | 2.98302000  | C  | 1.67059300  | 3.72249800  | 0.25880200  |
| H                                     | 4.19194800 | -2.44359900 | 4.00614300  | C  | 1.48261200  | 2.87844100  | -0.85424000 |
| H                                     | 4.11579500 | -3.92457000 | 3.04727600  | H  | -0.92447100 | 4.58086600  | -2.52431000 |
| H                                     | 5.15546100 | -2.59308800 | 2.52550400  | H  | 0.99701500  | 5.54644000  | 1.17936400  |
| C                                     | 1.66618500 | -2.54603000 | 2.85194500  | Cu | 0.39351600  | 0.08108300  | 0.58592900  |
| H                                     | 1.46425100 | -3.62283000 | 2.84947900  | H  | 4.82316100  | -0.13521800 | -1.91510600 |
| H                                     | 1.67226500 | -2.21063500 | 3.89465800  | H  | 3.92783200  | 2.48942600  | -2.10600200 |
| H                                     | 0.83913300 | -2.04246900 | 2.34294900  | C  | 4.34498200  | -1.16189200 | 1.63443000  |
| C                                     | 2.09828200 | -1.42520700 | -3.89196000 | H  | 3.89797400  | -0.18344500 | 1.43439400  |
| H                                     | 2.16765700 | -0.66664300 | -4.67917600 | C  | 1.94822300  | -2.25348200 | -2.78585300 |
| H                                     | 2.16114800 | -2.40510300 | -4.37656900 | H  | 1.63027800  | -1.21208000 | -2.67717600 |
| H                                     | 1.11190700 | -1.34507800 | -3.42719100 | C  | 2.70194400  | 3.43937700  | 1.34672800  |
| C                                     | 4.61357400 | -1.31767400 | -3.54368700 | H  | 3.16529000  | 2.47232000  | 1.13211700  |
| H                                     | 5.42388600 | -1.12156500 | -2.83348200 | C  | 0.39322000  | 2.28464100  | -3.11634200 |
| H                                     | 4.77885100 | -2.31343100 | -3.96913700 | H  | 1.07933500  | 1.43758800  | -3.02782500 |
| H                                     | 4.69256800 | -0.58945400 | -4.35805200 | C  | -2.83305000 | 0.65766300  | 0.18193700  |
| C                                     | 2.83059300 | 4.44174000  | -2.58326900 | N  | -2.03318900 | -0.59679900 | -0.14212200 |
| H                                     | 2.28598500 | 5.38564700  | -2.69052800 | C  | -2.45635000 | -1.62678200 | -0.98433400 |
| H                                     | 3.70427600 | 4.63196300  | -1.95128400 | C  | -2.21262000 | -2.97102100 | -0.62947300 |
| H                                     | 3.18709800 | 4.15120400  | -3.57719400 | C  | -3.09023300 | -1.37773400 | -2.21928500 |
| C                                     | 0.73181200 | 3.04193500  | -2.90748900 | C  | -2.57904900 | -4.01460200 | -1.47766800 |
| H                                     | 0.08204400 | 3.91768700  | -3.00813100 | H  | -1.74232400 | -3.18156000 | 0.32524600  |
| H                                     | 1.07455600 | 2.76383800  | -3.90997700 | C  | -3.45125100 | -2.42817900 | -3.06074100 |
| H                                     | 0.12843100 | 2.21930200  | -2.51267300 | H  | -3.31407000 | -0.35454900 | -2.50013700 |
| <b>L<sub>3</sub>-TSI3<sub>3</sub></b> |            |             |             | C  | -3.19871200 | -3.75535400 | -2.70338400 |
| C                                     | 1.93842500 | 0.45722500  | -0.44524500 | H  | -2.38397400 | -5.04048800 | -1.17341000 |
| C                                     | 3.49803200 | 1.62271800  | -1.63052400 | H  | -3.94312000 | -2.20536800 | -4.00471800 |
| C                                     | 3.93373800 | 0.34224400  | -1.53819800 | H  | -3.48853200 | -4.57015200 | -3.36048400 |
| N                                     | 2.97400500 | -0.35716700 | -0.81501700 | B  | -2.23485400 | -0.30683600 | 1.31386500  |
| N                                     | 2.28185000 | 1.67768300  | -0.96101100 | C  | -2.21292800 | -1.31434200 | 3.43246500  |
| C                                     | 2.57158000 | -2.69152300 | -1.46252800 | O  | -3.00201400 | -1.03731700 | 2.27679100  |
| C                                     | 3.07821400 | -1.77042900 | -0.52203300 | C  | -1.13299400 | -0.16133200 | 3.42276100  |
| C                                     | 3.72488600 | -2.16698300 | 0.66667600  | O  | -0.94105900 | 0.01918800  | 1.99902200  |
| C                                     | 3.83705500 | -3.54133100 | 0.90966400  | C  | -3.13063400 | -1.30128100 | 4.65821300  |
| C                                     | 3.33230900 | -4.47418300 | 0.00810300  | H  | -3.84435100 | -2.12733100 | 4.58483000  |
| C                                     | 2.71139400 | -4.05274800 | -1.16398500 | H  | -2.56269300 | -1.42618100 | 5.58720800  |
| H                                     | 4.32781500 | -3.88520200 | 1.81427100  | H  | -3.70234900 | -0.37331400 | 4.71396000  |
| H                                     | 2.32671300 | -4.79080700 | -1.85949000 | C  | -1.58089300 | -2.70996500 | 3.27859000  |
|                                       |            |             |             | H  | -0.86764100 | -2.73179200 | 2.44969300  |
|                                       |            |             |             | H  | -1.06614100 | -3.03761100 | 4.18835800  |

|   |             |             |             |                                     |             |             |             |
|---|-------------|-------------|-------------|-------------------------------------|-------------|-------------|-------------|
| H | -2.37711200 | -3.42594500 | 3.05726300  | H                                   | 0.10815900  | 3.89804900  | -4.57522400 |
| C | -1.67576800 | 1.16190900  | 3.98154700  | C                                   | 0.70079100  | -3.06730000 | -3.16771500 |
| H | -1.80354500 | 1.11967400  | 5.06758600  | H                                   | 0.95084400  | -4.10434800 | -3.41762500 |
| H | -0.96973200 | 1.96539900  | 3.75073900  | H                                   | -0.04178800 | -3.07714600 | -2.36723900 |
| H | -2.63608000 | 1.40945600  | 3.52329600  | H                                   | 0.23021900  | -2.62864600 | -4.05299000 |
| C | 0.19552800  | -0.51340700 | 4.08405500  | C                                   | 2.99622900  | -2.30991300 | -3.91867800 |
| H | 0.66036300  | -1.38040000 | 3.61013900  | H                                   | 3.86683600  | -1.68082600 | -3.70746100 |
| H | 0.88992100  | 0.33044600  | 4.01577100  | H                                   | 3.35399200  | -3.33497200 | -4.06579000 |
| H | 0.04883900  | -0.73844200 | 5.14590700  | H                                   | 2.55573100  | -1.96941700 | -4.86183600 |
| C | -4.28990600 | 0.76096400  | -0.10533000 | H                                   | 3.42692200  | -5.53574000 | 0.21842600  |
| C | -5.20960900 | -0.27085300 | 0.16782200  | H                                   | -0.65746300 | 6.07362800  | -0.57575400 |
| C | -4.79964600 | 1.96240800  | -0.63092400 |                                     |             |             |             |
| C | -6.57065400 | -0.10044800 | -0.07896300 |                                     |             |             |             |
| H | -4.85391800 | -1.20225500 | 0.59324300  | <b>L<sub>3</sub>-14<sub>3</sub></b> |             |             |             |
| C | -6.16374200 | 2.13821300  | -0.86468800 | C                                   | -1.70886200 | 0.99263200  | 0.00115500  |
| H | -4.10812500 | 2.77235600  | -0.85498700 | C                                   | -3.69165300 | 2.01686400  | 0.44446600  |
| C | -7.05958800 | 1.10289000  | -0.59448500 | C                                   | -2.75754900 | 2.98830200  | 0.29439600  |
| H | -7.25743900 | -0.91441400 | 0.13996400  | N                                   | -1.55299300 | 2.34960100  | 0.02820600  |
| H | -6.52470600 | 3.08211500  | -1.26649400 | N                                   | -3.03908600 | 0.80547400  | 0.25694700  |
| H | -8.12238600 | 1.23063400  | -0.78155300 | C                                   | 0.13596700  | 3.28091300  | -1.49821800 |
| H | -2.29733000 | 1.56190300  | -0.11808400 | C                                   | -0.31073000 | 3.06423500  | -0.17941500 |
| C | 2.05205300  | 3.33048700  | 2.73835600  | C                                   | 0.37574500  | 3.55562400  | 0.95113500  |
| H | 1.59208700  | 4.27550900  | 3.04588900  | C                                   | 1.56058200  | 4.26521700  | 0.72312000  |
| H | 1.27584200  | 2.56016400  | 2.74727000  | C                                   | 2.03875900  | 4.47675500  | -0.56692500 |
| H | 2.80508300  | 3.06991000  | 3.49015100  | C                                   | 1.33152600  | 3.99164500  | -1.66278800 |
| C | 3.82338600  | 4.49749600  | 1.33730600  | H                                   | 2.11870500  | 4.65350000  | 1.56886900  |
| H | 4.31776600  | 4.54837200  | 0.36166500  | H                                   | 1.71039700  | 4.16779000  | -2.66466400 |
| H | 3.43292000  | 5.49538100  | 1.56371500  | C                                   | -4.42808800 | -0.91690700 | -0.80714500 |
| H | 4.58216400  | 4.25778200  | 2.08998700  | C                                   | -5.07630800 | -2.15407200 | -0.71332000 |
| C | 5.86435400  | -1.04161400 | 1.39062500  | C                                   | -5.00644000 | -2.91798200 | 0.44902600  |
| H | 6.08716600  | -0.73664300 | 0.36344300  | C                                   | -4.29338800 | -2.45342800 | 1.54970900  |
| H | 6.30485800  | -0.29965000 | 2.06549100  | C                                   | -3.62901400 | -1.21993800 | 1.51837600  |
| H | 6.36509600  | -1.99942400 | 1.56912000  | C                                   | -3.70334100 | -0.47820700 | 0.32202800  |
| C | 4.06230400  | -1.49109100 | 3.11059200  | H                                   | -5.64489300 | -2.52280100 | -1.56109200 |
| H | 2.99096600  | -1.59886300 | 3.29862200  | H                                   | -4.25352200 | -3.05297100 | 2.45345900  |
| H | 4.55732800  | -2.41486100 | 3.42780700  | Cu                                  | -0.43878400 | -0.36645200 | -0.34237800 |
| H | 4.44041100  | -0.68670200 | 3.75022500  | H                                   | -2.83157700 | 4.06181500  | 0.35291700  |
| C | -1.03114600 | 1.70725000  | -3.20694700 | H                                   | -4.74488800 | 2.06969900  | 0.66667300  |
| H | -1.28002800 | 1.12530800  | -2.31637400 | C                                   | -0.14475800 | 3.38611400  | 2.37650200  |
| H | -1.77943500 | 2.49981200  | -3.31536500 | H                                   | -0.97137500 | 2.66961100  | 2.35504300  |
| H | -1.11724700 | 1.04826700  | -4.07727900 | C                                   | -0.63205400 | 2.80942900  | -2.72983700 |
| C | 0.77235200  | 3.04456500  | -4.40328500 | H                                   | -1.52394100 | 2.27375800  | -2.39276400 |
| H | 1.79848900  | 3.42514000  | -4.36051300 | C                                   | -2.90581200 | -0.71927700 | 2.76549600  |
| H | 0.69162400  | 2.38216600  | -5.27153100 | H                                   | -2.37561200 | 0.20108600  | 2.50631300  |

|   |             |             |             |                                       |             |             |             |
|---|-------------|-------------|-------------|---------------------------------------|-------------|-------------|-------------|
| C | -4.56613500 | -0.07927700 | -2.07723500 | H                                     | 7.54371400  | -1.16580000 | -0.60955900 |
| H | -3.83911800 | 0.73679500  | -2.02617500 | H                                     | 5.96739900  | 2.65836200  | -1.78290800 |
| C | 2.96105300  | -0.43804100 | -0.01690700 | H                                     | 7.90181100  | 1.10151100  | -1.57678700 |
| N | 2.79443600  | -1.60030800 | 0.86917000  | H                                     | 2.31022100  | 0.41717200  | 0.22574300  |
| C | 2.50065600  | -1.59664900 | 2.20965400  | H                                     | 2.96516300  | 5.02281800  | -0.71796900 |
| C | 1.89680100  | -2.72533000 | 2.81473400  | H                                     | -5.51514300 | -3.87646700 | 0.49805100  |
| C | 2.82966100  | -0.50222500 | 3.04207600  | C                                     | 0.91690700  | 2.81724500  | 3.33383000  |
| C | 1.63643300  | -2.74871700 | 4.18127000  | H                                     | 1.76452500  | 3.50015100  | 3.45415000  |
| H | 1.66070400  | -3.58443100 | 2.19398300  | H                                     | 0.47837000  | 2.66513300  | 4.32571100  |
| C | 2.56278300  | -0.54102000 | 4.40999600  | H                                     | 1.30176400  | 1.85539100  | 2.98707300  |
| H | 3.32875000  | 0.35516400  | 2.60060200  | C                                     | -0.70211400 | 4.72216200  | 2.91179500  |
| C | 1.96025900  | -1.65743900 | 4.99636100  | H                                     | 0.08598300  | 5.48060500  | 2.96954500  |
| H | 1.17963700  | -3.63401500 | 4.61865500  | H                                     | -1.49615700 | 5.12037500  | 2.27113900  |
| H | 2.84121300  | 0.31025200  | 5.02763600  | H                                     | -1.11378300 | 4.58921000  | 3.91784600  |
| H | 1.76246700  | -1.68485300 | 6.06393100  | C                                     | -1.85016100 | -1.71887400 | 3.27050500  |
| B | 2.24342200  | -1.82138500 | -0.46891800 | H                                     | -1.30916100 | -1.30240500 | 4.12515600  |
| C | 1.78343200  | -3.17758000 | -2.32388800 | H                                     | -2.30564900 | -2.66090900 | 3.59490600  |
| O | 2.73562500  | -2.86104800 | -1.32268200 | H                                     | -1.10902900 | -1.94897500 | 2.50054200  |
| C | 0.41514100  | -2.95637600 | -1.58151300 | C                                     | -3.91728400 | -0.36760700 | 3.87576400  |
| O | 0.73590700  | -1.78868900 | -0.76329600 | H                                     | -4.64123900 | 0.38237000  | 3.53957300  |
| C | 1.96772600  | -2.22329700 | -3.51991400 | H                                     | -4.47863200 | -1.25127100 | 4.19784000  |
| H | 3.00828100  | -2.28560100 | -3.84917400 | H                                     | -3.39446500 | 0.03213100  | 4.75079900  |
| H | 1.32109600  | -2.48093800 | -4.36591200 | C                                     | -4.25834400 | -0.87701500 | -3.35767700 |
| H | 1.77472600  | -1.18697700 | -3.23010900 | H                                     | -4.98218000 | -1.68182100 | -3.52186400 |
| C | 2.01685400  | -4.62113100 | -2.77946700 | H                                     | -4.30517000 | -0.21550800 | -4.22911100 |
| H | 2.03108300  | -5.30753600 | -1.93080500 | H                                     | -3.26103700 | -1.32291000 | -3.32249700 |
| H | 1.25009200  | -4.94965400 | -3.49042600 | C                                     | -5.97099900 | 0.55389100  | -2.16062900 |
| H | 2.98913700  | -4.68755600 | -3.27626500 | H                                     | -6.74566200 | -0.21807300 | -2.22150000 |
| C | -0.76945300 | -2.64487200 | -2.49224400 | H                                     | -6.19018500 | 1.17277100  | -1.28474300 |
| H | -0.93718300 | -3.47212800 | -3.19063900 | H                                     | -6.05529400 | 1.18611600  | -3.05091100 |
| H | -1.68475600 | -2.52064500 | -1.90317800 | C                                     | 0.19755500  | 1.82634700  | -3.57692100 |
| H | -0.60156300 | -1.73592400 | -3.07488400 | H                                     | -0.38768700 | 1.47531400  | -4.43382900 |
| C | 0.06337400  | -4.10521900 | -0.62839100 | H                                     | 1.10682100  | 2.29629000  | -3.96545300 |
| H | 0.92412900  | -4.37059500 | -0.01092800 | H                                     | 0.50113400  | 0.95572100  | -2.98805400 |
| H | -0.75334200 | -3.79307400 | 0.03026300  | C                                     | -1.11261800 | 4.00509400  | -3.57650200 |
| H | -0.26157300 | -4.99518100 | -1.17659700 | H                                     | -1.73199300 | 4.68955900  | -2.98772100 |
| C | 4.33432900  | -0.01505300 | -0.40798400 | H                                     | -0.26963100 | 4.57870100  | -3.97554100 |
| C | 5.43758000  | -0.87906800 | -0.29483100 | H                                     | -1.70703400 | 3.65432500  | -4.42688900 |
| C | 4.55566200  | 1.26322100  | -0.94958800 |                                       |             |             |             |
| C | 6.70642200  | -0.47910500 | -0.71092500 |                                       |             |             |             |
| H | 5.27972600  | -1.86661800 | 0.12658300  |                                       |             |             |             |
| C | 5.82465400  | 1.66191200  | -1.36992200 |                                       |             |             |             |
| H | 3.71803000  | 1.95262500  | -1.03565400 |                                       |             |             |             |
| C | 6.91129100  | 0.79245000  | -1.25375300 |                                       |             |             |             |
|   |             |             |             | <b>L<sub>3</sub>-TS15<sub>3</sub></b> |             |             |             |
|   |             |             |             | C                                     | 1.26788300  | 1.12705100  | 0.24148900  |
|   |             |             |             | C                                     | 1.94723800  | 3.19887800  | 0.91078700  |
|   |             |             |             | C                                     | 3.02126900  | 2.37778800  | 0.99010000  |



|    |             |             |             |   |             |             |             |
|----|-------------|-------------|-------------|---|-------------|-------------|-------------|
| N  | 2.59771900  | 1.11901200  | 0.57297900  | O | -1.26657700 | -3.46751800 | -0.77727500 |
| N  | 0.88294800  | 2.42540600  | 0.46131100  | C | -0.16587900 | -2.46286300 | -2.59041100 |
| C  | 4.34093100  | 0.01662000  | -0.75070700 | O | -0.76492600 | -1.41468900 | -1.77537800 |
| C  | 3.51328200  | 0.01208500  | 0.39281700  | C | 1.14036300  | -3.61909600 | -0.66632400 |
| C  | 3.58737900  | -0.99308300 | 1.38098200  | H | 1.01023300  | -4.35328800 | 0.13361200  |
| C  | 4.51647200  | -2.02169000 | 1.18135500  | H | 2.06243800  | -3.85439300 | -1.20779900 |
| C  | 5.34021700  | -2.04651900 | 0.05927100  | H | 1.26126100  | -2.63658600 | -0.19769500 |
| C  | 5.25397000  | -1.03629200 | -0.89249100 | C | -0.19504200 | -5.04795000 | -2.23004900 |
| H  | 4.59717400  | -2.81426800 | 1.91660800  | H | -1.13596500 | -5.16733900 | -2.77003400 |
| H  | 5.90696800  | -1.06116000 | -1.75926400 | H | 0.63582300  | -5.22030100 | -2.92355700 |
| C  | -0.80330300 | 3.21245900  | -1.14640800 | H | -0.15563400 | -5.81978500 | -1.45573900 |
| C  | -2.07669200 | 3.74789600  | -1.37628400 | C | 1.18025900  | -1.98277100 | -3.12228900 |
| C  | -2.93708400 | 4.04336400  | -0.32512900 | H | 1.67449800  | -2.77760200 | -3.69127500 |
| C  | -2.53743400 | 3.81358100  | 0.98755700  | H | 1.03363000  | -1.13001100 | -3.79293700 |
| C  | -1.28263300 | 3.26664000  | 1.28128800  | H | 1.84628900  | -1.67358100 | -2.31353100 |
| C  | -0.43403200 | 2.96500000  | 0.19313500  | C | -1.13004700 | -2.72199700 | -3.75546600 |
| H  | -2.39527600 | 3.93861000  | -2.39601400 | H | -2.08751200 | -3.10340900 | -3.39310100 |
| H  | -3.21518200 | 4.05367200  | 1.79983800  | H | -1.31352000 | -1.78262000 | -4.28455700 |
| Cu | 0.12314400  | -0.26841100 | -0.35622900 | H | -0.71675300 | -3.44412500 | -4.46640600 |
| H  | 4.03799800  | 2.56498200  | 1.29423800  | C | -1.97677000 | -1.73217900 | 2.05285100  |
| H  | 1.84053700  | 4.24979400  | 1.12222400  | C | -2.74501500 | -2.87265600 | 2.34316600  |
| C  | 2.74344700  | -0.94964600 | 2.65271500  | C | -1.23857900 | -1.15752900 | 3.10280900  |
| H  | 1.81212500  | -0.42648100 | 2.41753600  | C | -2.77389000 | -3.40956500 | 3.62992300  |
| C  | 4.31606200  | 1.13178700  | -1.79527400 | H | -3.32288800 | -3.32167300 | 1.54245500  |
| H  | 3.44156400  | 1.75999700  | -1.60527800 | C | -1.27427600 | -1.68891000 | 4.39253000  |
| C  | -0.87181200 | 3.06103200  | 2.73814100  | H | -0.63192600 | -0.27700500 | 2.90145200  |
| H  | -0.00970600 | 2.38605800  | 2.75432700  | C | -2.04204100 | -2.82356400 | 4.66570700  |
| C  | 0.12840500  | 2.97985300  | -2.33314500 | H | -3.37983700 | -4.29075700 | 3.82659800  |
| H  | 1.03240600  | 2.48564500  | -1.96862000 | H | -0.70614700 | -1.21128700 | 5.18797400  |
| C  | -1.92647600 | -1.15201600 | 0.67960700  | H | -2.07174500 | -3.24072400 | 5.66842900  |
| N  | -2.90936900 | -1.62701700 | -0.30391800 | H | -1.85413300 | -0.05228500 | 0.70193700  |
| C  | -3.94962100 | -0.86125900 | -0.80491900 | H | -3.92171700 | 4.45306400  | -0.52907500 |
| C  | -4.47831700 | -1.13444900 | -2.08515100 | H | 6.05391500  | -2.85515100 | -0.07045000 |
| C  | -4.54338400 | 0.17052900  | -0.04985800 | C | 3.46895000  | -0.14550200 | 3.75344400  |
| C  | -5.54959700 | -0.40006900 | -2.58394200 | H | 4.41987300  | -0.62106500 | 4.01838100  |
| H  | -4.04272200 | -1.93746600 | -2.67147200 | H | 3.68338600  | 0.88010900  | 3.43703100  |
| C  | -5.61697300 | 0.89826400  | -0.56112900 | H | 2.85291700  | -0.09677800 | 4.65764300  |
| H  | -4.16731400 | 0.37996800  | 0.94659200  | C | 2.35457400  | -2.34278500 | 3.17512000  |
| C  | -6.13077600 | 0.62535100  | -1.83057300 | H | 1.90181500  | -2.95527900 | 2.39086200  |
| H  | -5.93753400 | -0.63291800 | -3.57294500 | H | 3.21639200  | -2.88369200 | 3.58157800  |
| H  | -6.06162000 | 1.68285600  | 0.04704400  | H | 1.61885500  | -2.24468200 | 3.97735000  |
| H  | -6.96911300 | 1.19326100  | -2.22326100 | C | -1.97965800 | 2.41123800  | 3.58810300  |
| B  | -1.60401300 | -2.08757800 | -0.73657000 | H | -1.59669800 | 2.18920000  | 4.58957800  |
| C  | -0.10055200 | -3.66704400 | -1.57448200 | H | -2.83919600 | 3.07785600  | 3.71251600  |

|                                     |             |             |             |    |             |             |             |
|-------------------------------------|-------------|-------------|-------------|----|-------------|-------------|-------------|
| H                                   | -2.33310700 | 1.47420100  | 3.15237600  | H  | 1.11837600  | 5.81517100  | -0.09202100 |
| C                                   | -0.43683100 | 4.39657000  | 3.37976700  | Cu | 0.08622100  | 0.30860700  | 0.24261000  |
| H                                   | -0.11192200 | 4.23692800  | 4.41345200  | H  | 5.15778600  | -0.33907100 | -0.43134100 |
| H                                   | 0.38806300  | 4.86809700  | 2.83697600  | H  | 4.48559300  | 2.14977600  | -1.46272900 |
| H                                   | -1.26973500 | 5.10791400  | 3.39522900  | C  | 2.75044900  | -0.68667700 | 2.81007000  |
| C                                   | 4.18251500  | 0.59839600  | -3.23357400 | H  | 2.32782500  | 0.15016500  | 2.24720500  |
| H                                   | 4.10686700  | 1.43535400  | -3.93589100 | C  | 3.37244400  | -2.73714000 | -1.87854100 |
| H                                   | 5.05133300  | 0.00210100  | -3.53100300 | H  | 3.12839200  | -1.71146600 | -2.17119600 |
| H                                   | 3.29149100  | -0.02334000 | -3.34803500 | C  | 2.52506200  | 3.75948400  | 0.97802800  |
| C                                   | 5.56718900  | 2.02630900  | -1.66896400 | H  | 2.92322100  | 2.75199900  | 1.12645600  |
| H                                   | 5.65586100  | 2.46327900  | -0.66946600 | C  | 1.11141200  | 1.57535300  | -3.47674800 |
| H                                   | 6.48045100  | 1.45283800  | -1.86085900 | H  | 1.62722600  | 0.73374300  | -3.00630000 |
| H                                   | 5.52677200  | 2.84620000  | -2.39394000 | C  | -1.71648200 | 0.68476400  | 0.96527500  |
| C                                   | 0.56137400  | 4.32401500  | -2.95398300 | N  | -2.87116200 | 0.23445400  | 0.13750800  |
| H                                   | -0.29670300 | 4.87205300  | -3.35753200 | C  | -4.00511500 | 1.09452100  | 0.08226100  |
| H                                   | 1.04926400  | 4.96804600  | -2.21478400 | C  | -4.75039900 | 1.22647600  | -1.10464000 |
| H                                   | 1.26551600  | 4.15551300  | -3.77608800 | C  | -4.38716100 | 1.87202200  | 1.19095200  |
| C                                   | -0.49585400 | 2.05314700  | -3.39368300 | C  | -5.84635400 | 2.08419800  | -1.16931800 |
| H                                   | -0.78072100 | 1.08796300  | -2.96540000 | H  | -4.46703200 | 0.64718800  | -1.97497200 |
| H                                   | -1.38860900 | 2.49768900  | -3.84599100 | C  | -5.47983000 | 2.73547700  | 1.11383500  |
| H                                   | 0.22380900  | 1.87295000  | -4.20029200 | H  | -3.83841700 | 1.78655000  | 2.12083200  |
| <b>L<sub>3</sub>-16<sub>3</sub></b> |             |             |             | C  | -6.22110700 | 2.84879900  | -0.06274400 |
| C                                   | 1.94574000  | 0.39188500  | -0.30519900 | H  | -6.40296300 | 2.16386800  | -2.09992600 |
| C                                   | 3.87913200  | 1.37244200  | -1.02675900 | H  | -5.75552200 | 3.31812600  | 1.98934900  |
| C                                   | 4.20589800  | 0.15693200  | -0.52514200 | H  | -7.07221400 | 3.52157400  | -0.11799500 |
| N                                   | 3.02001500  | -0.43406600 | -0.09771200 | B  | -2.87777300 | -1.03022100 | -0.49941800 |
| N                                   | 2.50294400  | 1.50173600  | -0.88441800 | C  | -2.11715200 | -2.99638400 | -1.39419000 |
| C                                   | 3.13676500  | -2.87137900 | -0.37510400 | O  | -1.79372300 | -1.90508300 | -0.49691400 |
| C                                   | 2.97209600  | -1.76059500 | 0.47944200  | C  | -3.69214700 | -2.97081100 | -1.39650800 |
| C                                   | 2.81668700  | -1.89319300 | 1.87635200  | O  | -3.96772900 | -1.56985800 | -1.17549900 |
| C                                   | 2.79772500  | -3.19175300 | 2.39962600  | C  | -1.52426700 | -2.64731600 | -2.76653100 |
| C                                   | 2.94672500  | -4.30590400 | 1.57886400  | H  | -0.45651900 | -2.44630600 | -2.65074000 |
| C                                   | 3.12249800  | -4.14476400 | 0.20882400  | H  | -1.64866000 | -3.46393700 | -3.48462100 |
| H                                   | 2.66931400  | -3.33158700 | 3.46703500  | H  | -1.99066000 | -1.74829200 | -3.17854600 |
| H                                   | 3.24957000  | -5.02024400 | -0.42009400 | C  | -1.48641300 | -4.27603700 | -0.84972900 |
| C                                   | 1.12016200  | 2.74458500  | -2.49729100 | H  | -1.80134300 | -4.47100700 | 0.17699200  |
| C                                   | 0.45699900  | 3.93160300  | -2.83302200 | H  | -1.75512700 | -5.13872800 | -1.46908300 |
| C                                   | 0.45703500  | 5.02657400  | -1.97457900 | H  | -0.39657700 | -4.18185700 | -0.85067100 |
| C                                   | 1.12493500  | 4.95594900  | -0.75562100 | C  | -4.35039800 | -3.39458000 | -2.70951900 |
| C                                   | 1.80118500  | 3.79402700  | -0.36538600 | H  | -4.11139100 | -4.43597900 | -2.95105200 |
| C                                   | 1.78166200  | 2.69939600  | -1.25422400 | H  | -5.43702700 | -3.31054400 | -2.61604300 |
| H                                   | -0.06769200 | 3.99640200  | -3.78118200 | H  | -4.03623400 | -2.76160400 | -3.54132900 |
|                                     |             |             |             | C  | -4.31383800 | -3.75041200 | -0.22820400 |
|                                     |             |             |             | H  | -3.85684600 | -3.47077900 | 0.72507200  |

|   |             |             |             |                                     |             |             |             |
|---|-------------|-------------|-------------|-------------------------------------|-------------|-------------|-------------|
| H | -5.37881700 | -3.50909400 | -0.17262700 | H                                   | 2.91256100  | 2.21365500  | -4.55257900 |
| H | -4.21018900 | -4.83210000 | -0.35915000 | H                                   | 1.90042900  | 1.06279100  | -5.44370800 |
| C | -1.78255500 | 0.27557400  | 2.41188300  | H                                   | -0.06570300 | 5.93634600  | -2.25533800 |
| C | -2.17961000 | -1.01075700 | 2.82845800  | H                                   | 2.93101800  | -5.30270800 | 2.01044800  |
| C | -1.41994700 | 1.18713600  | 3.42617200  |                                     |             |             |             |
| C | -2.21404500 | -1.36170600 | 4.17819000  | <b>L<sub>3</sub>-17<sub>3</sub></b> |             |             |             |
| H | -2.45498000 | -1.74533000 | 2.07914100  |                                     |             |             |             |
| C | -1.44644800 | 0.83650800  | 4.77554300  | Cu                                  | 0.23644100  | -0.70160000 | -0.17093700 |
| H | -1.13341600 | 2.19857200  | 3.14401300  | N                                   | -2.55876700 | 0.14365100  | 0.25033000  |
| C | -1.84665800 | -0.44391300 | 5.16576500  | N                                   | 2.51867500  | -1.77741800 | 1.45846300  |
| H | -2.53297600 | -2.36251100 | 4.46091700  | N                                   | 2.86730900  | -1.93973700 | -0.65838700 |
| H | -1.17072400 | 1.57329800  | 5.52681100  | O                                   | -4.99602500 | -0.08276500 | 0.81668200  |
| H | -1.87823500 | -0.71835900 | 6.21638000  | O                                   | -4.16834900 | -1.25817500 | -0.97603900 |
| H | -1.73469900 | 1.78134300  | 0.93176700  | B                                   | -3.87376200 | -0.37441500 | 0.05303000  |
| C | 1.56700000  | 4.04182700  | 2.15062700  | C                                   | 1.95782500  | -1.47036600 | 0.24965500  |
| H | 2.10134100  | 3.95919300  | 3.10323400  | C                                   | 3.73983200  | -2.42461300 | 1.30360900  |
| H | 1.14428500  | 5.05056400  | 2.09510100  | C                                   | 3.96187800  | -2.52320900 | -0.03051100 |
| H | 0.73867400  | 3.32833400  | 2.16131900  | C                                   | 2.72194200  | -1.87550100 | -2.09589800 |
| C | 3.72036400  | 4.73317700  | 0.99361900  | C                                   | 3.17285000  | -0.72516000 | -2.77451200 |
| H | 4.43095900  | 4.51133600  | 0.19051300  | C                                   | 3.07370200  | -0.72177500 | -4.17144300 |
| H | 3.39175700  | 5.77038800  | 0.86770700  | H                                   | 3.41318300  | 0.14814600  | -4.72420100 |
| H | 4.25536000  | 4.66638200  | 1.94696100  | C                                   | 2.54204000  | -1.80801700 | -4.86050300 |
| C | 4.17256300  | -0.28416100 | 3.25820500  | C                                   | 2.08920700  | -2.92387100 | -4.16245100 |
| H | 4.64508600  | -1.09377200 | 3.82586900  | H                                   | 1.66562900  | -3.76149400 | -4.70837900 |
| H | 4.81924200  | -0.05142700 | 2.40600500  | C                                   | 2.16860800  | -2.98552100 | -2.76566900 |
| H | 4.13273100  | 0.60008100  | 3.90352600  | C                                   | 1.65663800  | -4.22364100 | -2.03513900 |
| C | 1.83977000  | -0.90354500 | 4.02877000  | C                                   | 3.76004600  | 0.48249800  | -2.05084600 |
| H | 2.25509100  | -1.63898900 | 4.72718900  | C                                   | 1.94559900  | -1.47043100 | 2.75061300  |
| H | 1.73131300  | 0.03589300  | 4.57829300  | C                                   | 2.44480200  | -0.35681700 | 3.45746700  |
| H | 0.83854900  | -1.22865500 | 3.73593100  | C                                   | 3.54878000  | 0.54347500  | 2.90878600  |
| C | 2.47358400  | -3.67060300 | -2.70919400 | C                                   | 1.90252100  | -0.09946800 | 4.72179000  |
| H | 2.60831600  | -3.46783100 | -3.77702700 | H                                   | 2.26319200  | 0.75131100  | 5.29109800  |
| H | 2.71761200  | -4.72553300 | -2.54624900 | C                                   | 0.90427600  | -0.90843800 | 5.25607500  |
| H | 1.41796700  | -3.52962600 | -2.46684900 | C                                   | 0.43075200  | -2.00006800 | 4.53552000  |
| C | 4.85482200  | -2.98563200 | -2.22974600 | H                                   | -0.34901200 | -2.62406900 | 4.96112400  |
| H | 5.52370100  | -2.30372900 | -1.69626100 | C                                   | 0.94104000  | -2.31178500 | 3.26923300  |
| H | 5.15165200  | -4.00745600 | -1.96942100 | C                                   | 0.41414200  | -3.53667400 | 2.52775900  |
| H | 5.02246500  | -2.85042500 | -3.30373800 | C                                   | -1.55701500 | -0.17316900 | -0.80649300 |
| C | -0.32343600 | 1.10886300  | -3.78788600 | H                                   | -1.87916800 | -1.12859800 | -1.23549200 |
| H | -0.89904900 | 1.88709100  | -4.30031500 | C                                   | -2.19812000 | 0.99061300  | 1.32467100  |
| H | -0.30187300 | 0.22940200  | -4.44048500 | C                                   | -1.09924700 | 1.86729500  | 1.21634400  |
| H | -0.85767600 | 0.84395900  | -2.87079300 | H                                   | -0.52851100 | 1.89122700  | 0.29662500  |
| C | 1.87856700  | 1.92422600  | -4.76738600 | C                                   | -0.74766000 | 2.71959500  | 2.26573600  |
| H | 1.40514300  | 2.75470500  | -5.30193500 | H                                   | 0.08975200  | 3.39941400  | 2.13058600  |

|    |             |             |             |                                       |             |             |             |
|----|-------------|-------------|-------------|---------------------------------------|-------------|-------------|-------------|
| C  | -1.47136700 | 2.71969900  | 3.45787000  | H                                     | -0.21907800 | 7.14376200  | -0.79371000 |
| H  | -1.20110600 | 3.38737000  | 4.27080900  | C                                     | 0.28285200  | 5.01525200  | -1.01535800 |
| C  | -2.55228900 | 1.84390300  | 3.58169200  | H                                     | -0.16180000 | 4.04011600  | -0.83201400 |
| H  | -3.12683400 | 1.81684000  | 4.50455800  | H                                     | 0.58100000  | 5.10184500  | -2.05929000 |
| C  | -2.91239600 | 0.99140100  | 2.54050500  | H                                     | 2.47441800  | -1.78230100 | -5.94443200 |
| H  | -3.75877400 | 0.32880800  | 2.66038100  | H                                     | 0.49230400  | -0.68542300 | 6.23601700  |
| C  | -6.05774900 | -0.97433500 | 0.39577600  | H                                     | 4.32577500  | -2.74708000 | 2.14890400  |
| C  | -7.38499000 | -0.22433500 | 0.49515300  | H                                     | 4.78074900  | -2.94949800 | -0.58715200 |
| H  | -7.59127900 | 0.02156300  | 1.54110300  | C                                     | 4.87417700  | 0.31576600  | 3.66423900  |
| H  | -8.21109800 | -0.83981100 | 0.12304700  | H                                     | 4.77385000  | 0.57487300  | 4.72387000  |
| H  | -7.36184100 | 0.70890100  | -0.07002000 | H                                     | 5.19887900  | -0.72869800 | 3.60895800  |
| C  | -6.05503700 | -2.16946100 | 1.36018700  | H                                     | 5.66869400  | 0.93972100  | 3.24095000  |
| H  | -5.11042000 | -2.71809900 | 1.30561900  | C                                     | 3.15533800  | 2.03166500  | 2.93161200  |
| H  | -6.87329100 | -2.86435800 | 1.14773900  | H                                     | 3.04148800  | 2.40685300  | 3.95433700  |
| H  | -6.17502300 | -1.80066500 | 2.38286600  | H                                     | 3.93210200  | 2.63239800  | 2.44704400  |
| C  | -5.60830800 | -1.35850900 | -1.06596700 | H                                     | 2.21401300  | 2.20296000  | 2.40468500  |
| C  | -5.96881300 | -2.77624300 | -1.50741200 | C                                     | 3.11722600  | 1.80325000  | -2.51454500 |
| H  | -5.58739700 | -2.95186200 | -2.51756600 | H                                     | 3.43028300  | 2.62641000  | -1.86505500 |
| H  | -7.05482200 | -2.91727900 | -1.52699100 | H                                     | 3.41184100  | 2.05992600  | -3.53833300 |
| H  | -5.53035100 | -3.52712300 | -0.84753400 | H                                     | 2.02555900  | 1.74406500  | -2.48509200 |
| C  | -6.06742000 | -0.34513500 | -2.12463100 | C                                     | 5.29390600  | 0.52741000  | -2.20284900 |
| H  | -5.81310900 | 0.67684200  | -1.83035900 | H                                     | 5.76559800  | -0.37916700 | -1.80896500 |
| H  | -7.14634600 | -0.40029300 | -2.30056100 | H                                     | 5.58297400  | 0.62316400  | -3.25536300 |
| H  | -5.55168900 | -0.55921700 | -3.06464500 | H                                     | 5.70626300  | 1.38613700  | -1.66244800 |
| C  | -1.53267100 | 0.81065300  | -1.94680700 | C                                     | -1.09902600 | -3.43121600 | 2.25636700  |
| C  | -0.81525400 | 0.49543600  | -3.12143700 | H                                     | -1.43983300 | -4.29754000 | 1.67869800  |
| H  | -0.28834600 | -0.45524800 | -3.17596000 | H                                     | -1.67362700 | -3.40720600 | 3.18854800  |
| C  | -0.76597700 | 1.36703800  | -4.20515700 | H                                     | -1.33713200 | -2.52618000 | 1.68950100  |
| H  | -0.20659900 | 1.08378600  | -5.09378600 | C                                     | 0.75603100  | -4.83534900 | 3.28510900  |
| C  | -1.42980100 | 2.59902100  | -4.15766000 | H                                     | 1.83512600  | -4.93551800 | 3.44218000  |
| H  | -1.39007200 | 3.28160500  | -5.00205700 | H                                     | 0.27295800  | -4.86518800 | 4.26758100  |
| C  | -2.15028700 | 2.92708200  | -3.01032000 | H                                     | 0.41263700  | -5.70835700 | 2.71954600  |
| H  | -2.68249200 | 3.87412700  | -2.95428300 | C                                     | 2.46858300  | -5.47813600 | -2.41241600 |
| C  | -2.20436500 | 2.04665300  | -1.92392000 | H                                     | 2.11357700  | -6.34697300 | -1.84787600 |
| H  | -2.78780000 | 2.31553400  | -1.04913600 | H                                     | 2.37208400  | -5.71230800 | -3.47789900 |
| H  | 3.71715700  | 0.27430200  | 1.86212800  | H                                     | 3.53404700  | -5.34626700 | -2.19691800 |
| H  | 0.91110400  | -3.58601800 | 1.55533900  | C                                     | 0.15082800  | -4.43944600 | -2.28201700 |
| H  | 1.78565800  | -4.06323900 | -0.96126100 | H                                     | -0.05924400 | -4.63818800 | -3.33839200 |
| H  | 3.53730300  | 0.37608700  | -0.98570900 | H                                     | -0.20854000 | -5.29865200 | -1.70526700 |
| C  | -1.70029200 | 5.96662300  | 0.13343300  | H                                     | -0.42788800 | -3.56044900 | -1.98301600 |
| H  | -2.31110400 | 6.81069600  | 0.43962800  |                                       |             |             |             |
| H  | -2.05140200 | 4.97642900  | 0.41133400  |                                       |             |             |             |
| Br | 2.04575600  | 4.99018600  | -0.03399800 |                                       |             |             |             |
| C  | -0.56385800 | 6.14155700  | -0.54552100 |                                       |             |             |             |
|    |             |             |             | <b>L<sub>3</sub>-TS18<sub>3</sub></b> |             |             |             |
|    |             |             |             | Cu                                    | 0.68330700  | -0.02532000 | 0.91547600  |

|   |             |             |             |    |             |             |             |
|---|-------------|-------------|-------------|----|-------------|-------------|-------------|
| N | -2.31049800 | -0.76769100 | 0.65797700  | H  | -7.20428000 | -2.15350300 | -0.21145900 |
| N | 2.30742000  | -0.70661500 | -1.70204100 | H  | -7.79502900 | -0.66022300 | -0.95770200 |
| N | 2.13488100  | 1.42352600  | -1.45627400 | H  | -7.10358100 | -0.62997300 | 0.67813700  |
| O | -4.64501400 | -1.37181500 | 0.02011500  | C  | -5.49010800 | -1.67321300 | -2.20790000 |
| O | -3.77625100 | 0.60160100  | -0.78224700 | H  | -4.50295200 | -1.54098800 | -2.65757800 |
| B | -3.54591100 | -0.52833400 | -0.01320200 | H  | -6.24886600 | -1.39437400 | -2.94571400 |
| C | 1.72553400  | 0.23977300  | -0.89439600 | H  | -5.61159700 | -2.73422300 | -1.97260000 |
| C | 3.05478500  | -0.12428800 | -2.72296500 | C  | -5.19604900 | 0.65226700  | -1.06802300 |
| C | 2.95075100  | 1.21420000  | -2.56585100 | C  | -5.39047800 | 1.23886900  | -2.46569900 |
| C | 1.72109200  | 2.76216400  | -1.08559800 | H  | -5.03879300 | 2.27442500  | -2.48056600 |
| C | 2.47631200  | 3.48163000  | -0.13574600 | H  | -6.44920200 | 1.23773100  | -2.74630800 |
| C | 2.07981400  | 4.79674100  | 0.14149900  | H  | -4.82998500 | 0.68138300  | -3.21853700 |
| H | 2.63646200  | 5.37518900  | 0.87107100  | C  | -5.83201700 | 1.57747700  | -0.02097300 |
| C | 0.99606500  | 5.37868400  | -0.50868400 | H  | -5.69696800 | 1.18603500  | 0.99050300  |
| C | 0.28346200  | 4.65485500  | -1.45943200 | H  | -6.90171800 | 1.72118100  | -0.20218100 |
| H | -0.55449400 | 5.12056300  | -1.96747900 | H  | -5.33842200 | 2.55187700  | -0.06482800 |
| C | 0.62746400  | 3.33431400  | -1.77347400 | C  | -1.80085200 | 1.47089200  | 1.62367800  |
| C | -0.14054400 | 2.59877900  | -2.86972900 | C  | -1.19102600 | 2.74025400  | 1.52324600  |
| C | 3.72514500  | 2.90759800  | 0.52499900  | H  | -0.40274200 | 2.89076300  | 0.79248700  |
| C | 2.12087100  | -2.14233900 | -1.63374300 | C  | -1.57378700 | 3.80103300  | 2.33774700  |
| C | 3.13701900  | -2.94601800 | -1.07411500 | H  | -1.08182200 | 4.76370300  | 2.22271900  |
| C | 4.44606300  | -2.37499600 | -0.53454600 | C  | -2.58521100 | 3.63784100  | 3.29162100  |
| C | 2.93926400  | -4.33374700 | -1.08462700 | H  | -2.88482600 | 4.46590100  | 3.92771000  |
| H | 3.69924000  | -4.97979800 | -0.65826400 | C  | -3.20203200 | 2.39337100  | 3.40693500  |
| C | 1.79371100  | -4.89869200 | -1.63457100 | H  | -3.99186700 | 2.24365200  | 4.13934400  |
| C | 0.81863800  | -4.08449000 | -2.20304900 | C  | -2.81762400 | 1.32797400  | 2.58784900  |
| H | -0.06522300 | -4.53700500 | -2.63885600 | H  | -3.32135800 | 0.37241600  | 2.69059300  |
| C | 0.96052700  | -2.69221700 | -2.22491400 | H  | 4.28508400  | -1.31703900 | -0.31262300 |
| C | -0.07997300 | -1.82961900 | -2.93573300 | H  | -0.04143400 | -0.82954300 | -2.49562500 |
| C | -1.34351500 | 0.35606300  | 0.73314100  | H  | 0.10324800  | 1.53509900  | -2.79834700 |
| H | -1.21948600 | 0.75825300  | -0.27669200 | H  | 3.67328400  | 1.81873300  | 0.46046100  |
| C | -2.06070600 | -2.02510500 | 1.28293100  | C  | -0.26421200 | -0.34737700 | 3.61189800  |
| C | -0.85661300 | -2.71307000 | 1.06508700  | H  | -1.23797100 | -0.72624200 | 3.34295000  |
| H | -0.11004700 | -2.28126900 | 0.40666200  | H  | -0.13027200 | 0.72789800  | 3.58399500  |
| C | -0.61383100 | -3.94604800 | 1.66974100  | Br | 2.82611500  | -0.34310400 | 2.10117500  |
| H | 0.32585900  | -4.45528300 | 1.47496900  | C  | 0.68744500  | -1.16685900 | 4.17640700  |
| C | -1.57579300 | -4.52955300 | 2.49779400  | H  | 0.51527300  | -2.24041900 | 4.18969000  |
| H | -1.38919600 | -5.49198700 | 2.96575300  | C  | 1.95223700  | -0.68507300 | 4.51391300  |
| C | -2.78306800 | -3.86178400 | 2.70889500  | H  | 2.11106500  | 0.37585200  | 4.66390600  |
| H | -3.54384200 | -4.30062300 | 3.34914000  | H  | 2.71968800  | -1.34420000 | 4.90474700  |
| C | -3.02394200 | -2.62252200 | 2.11353300  | H  | 3.36724600  | 2.03223900  | -3.13033800 |
| H | -3.96733300 | -2.11586600 | 2.27983800  | H  | 3.57629600  | -0.71469100 | -3.45788600 |
| C | -5.62783200 | -0.86066300 | -0.91307500 | C  | 3.82559600  | 3.24955300  | 2.02098300  |
| C | -7.01647100 | -1.08052900 | -0.31216200 | H  | 3.99340200  | 4.31877700  | 2.19254000  |

|                                     |             |             |             |   |             |             |             |
|-------------------------------------|-------------|-------------|-------------|---|-------------|-------------|-------------|
| H                                   | 2.92089800  | 2.94860600  | 2.55510300  | C | -2.78873200 | 1.60665500  | 2.32566700  |
| H                                   | 4.66821700  | 2.70999700  | 2.46381200  | C | -0.78082600 | 2.70330300  | 1.43661500  |
| C                                   | 4.99147700  | 3.37222300  | -0.22506500 | C | -1.11760600 | 3.89204800  | 0.75491300  |
| H                                   | 5.88612000  | 2.93599500  | 0.23218700  | C | -0.21966700 | 4.96574700  | 0.84866000  |
| H                                   | 4.97279500  | 3.07183400  | -1.27764900 | H | -0.44977600 | 5.89038200  | 0.32979800  |
| H                                   | 5.09228100  | 4.46306500  | -0.19135400 | C | 0.95190900  | 4.87031500  | 1.59012200  |
| C                                   | 5.56544300  | -2.48765200 | -1.59232300 | C | 1.24227500  | 3.69911000  | 2.28433600  |
| H                                   | 5.76790700  | -3.53666900 | -1.83643800 | H | 2.14792400  | 3.64289900  | 2.87783400  |
| H                                   | 5.30861400  | -1.97508900 | -2.52410700 | C | 0.37918100  | 2.59850400  | 2.24216100  |
| H                                   | 6.49319400  | -2.04587200 | -1.21288000 | C | 0.65844100  | 1.38190300  | 3.12382300  |
| C                                   | 4.89738200  | -3.04082000 | 0.77741000  | C | -2.42062100 | 4.07412600  | -0.01636900 |
| H                                   | 4.10988500  | -2.99600700 | 1.53203700  | C | -2.97868600 | -1.73795600 | 1.09663100  |
| H                                   | 5.18950000  | -4.08628900 | 0.62877500  | C | -3.99633000 | -2.10543200 | 0.19106800  |
| H                                   | 5.77083400  | -2.51349900 | 1.17449000  | C | -4.81544500 | -1.08353300 | -0.58974400 |
| C                                   | -1.52145900 | -2.33512400 | -2.76216400 | C | -4.31324700 | -3.46802900 | 0.09364500  |
| H                                   | -1.69889700 | -3.27078700 | -3.30356000 | H | -5.08427100 | -3.78087500 | -0.60230700 |
| H                                   | -1.77090500 | -2.49339100 | -1.71047400 | C | -3.67801100 | -4.41908800 | 0.88355100  |
| H                                   | -2.21473100 | -1.59183500 | -3.16819500 | C | -2.71486400 | -4.02428000 | 1.80860900  |
| C                                   | 0.26096400  | -1.70178700 | -4.43636500 | H | -2.24828200 | -4.76994700 | 2.44373600  |
| H                                   | 1.25429800  | -1.27223600 | -4.59473900 | C | -2.34855100 | -2.67966600 | 1.94593900  |
| H                                   | 0.23749000  | -2.68343500 | -4.92289100 | C | -1.38077300 | -2.27477400 | 3.05873300  |
| H                                   | -0.46833200 | -1.05849700 | -4.94112400 | C | 1.38176800  | 0.09061200  | -0.71249600 |
| C                                   | -1.66840100 | 2.72540000  | -2.72872700 | H | 1.18008700  | 0.52197300  | 0.26951100  |
| H                                   | -2.15866000 | 2.11904400  | -3.49768100 | C | 1.75479200  | -2.43266700 | -0.87400100 |
| H                                   | -2.02739700 | 2.37878500  | -1.75719600 | C | 0.54026400  | -2.90063400 | -0.35735100 |
| H                                   | -2.00428900 | 3.75842200  | -2.87104700 | H | -0.07038900 | -2.23902000 | 0.24637400  |
| C                                   | 0.30947100  | 3.08721400  | -4.26349500 | C | 0.10947400  | -4.20381900 | -0.61859200 |
| H                                   | 0.08789000  | 4.15218900  | -4.39386800 | H | -0.83854100 | -4.53834300 | -0.20956500 |
| H                                   | 1.38421500  | 2.94964900  | -4.41638900 | C | 0.89046400  | -5.06665400 | -1.38828400 |
| H                                   | -0.21613800 | 2.53561600  | -5.05049100 | H | 0.55617000  | -6.08064500 | -1.58745100 |
| H                                   | 1.66313000  | -5.97723800 | -1.62821200 | C | 2.10544700  | -4.60831200 | -1.90170700 |
| H                                   | 0.71042800  | 6.40149800  | -0.27923000 | H | 2.72282100  | -5.26353000 | -2.51021400 |
|                                     |             |             |             | C | 2.53194200  | -3.30469500 | -1.65434500 |
|                                     |             |             |             | H | 3.47453600  | -2.95578800 | -2.05918300 |
|                                     |             |             |             | C | 5.61987900  | -1.40354800 | 0.74010100  |
|                                     |             |             |             | C | 6.91460400  | -1.98619000 | 0.17644300  |
|                                     |             |             |             | H | 6.91918200  | -3.07105000 | 0.31604000  |
|                                     |             |             |             | H | 7.78694500  | -1.57489700 | 0.69536300  |
|                                     |             |             |             | H | 7.01667900  | -1.78385100 | -0.89127000 |
|                                     |             |             |             | C | 5.41538600  | -1.87353500 | 2.18663200  |
|                                     |             |             |             | H | 4.49378800  | -1.46365900 | 2.60942100  |
|                                     |             |             |             | H | 6.25199100  | -1.58365000 | 2.82965800  |
|                                     |             |             |             | H | 5.33503900  | -2.96396400 | 2.19567800  |
|                                     |             |             |             | C | 5.44920500  | 0.15414300  | 0.56086600  |
| <b>L<sub>3</sub>-19<sub>3</sub></b> |             |             |             |   |             |             |             |
| Cu                                  | -0.65621500 | 0.01620900  | -1.13365100 |   |             |             |             |
| N                                   | 2.22295900  | -1.11005800 | -0.60554900 |   |             |             |             |
| N                                   | -2.67033200 | -0.33168400 | 1.28941600  |   |             |             |             |
| N                                   | -1.71622600 | 1.59327400  | 1.43883900  |   |             |             |             |
| O                                   | 4.50900000  | -1.92404700 | -0.03670600 |   |             |             |             |
| O                                   | 4.01208800  | 0.28120100  | 0.38570900  |   |             |             |             |
| B                                   | 3.55258100  | -0.92833000 | -0.10516700 |   |             |             |             |
| C                                   | -1.63256700 | 0.40053900  | 0.75668600  |   |             |             |             |
| C                                   | -3.38765900 | 0.40055400  | 2.23126000  |   |             |             |             |



|   |             |             |             |    |             |             |             |
|---|-------------|-------------|-------------|----|-------------|-------------|-------------|
| C | -0.73476800 | 1.11787200  | 3.01051800  | C  | -2.04458500 | -1.63932300 | -1.92815700 |
| C | -0.25495100 | 2.52988000  | 2.68083100  | C  | -1.86117000 | -2.99147900 | -1.58729500 |
| C | 0.39943300  | -2.58642600 | 2.72738800  | H  | -1.22385300 | -3.24478200 | -0.74887300 |
| C | 4.10577800  | 0.65849100  | -0.07137800 | C  | -2.45406900 | -4.00421700 | -2.33814300 |
| C | 4.97603600  | -0.40005000 | -0.41349400 | H  | -2.29727300 | -5.04071600 | -2.05290300 |
| C | 4.89870200  | -1.78638300 | 0.22276000  | C  | -3.24121900 | -3.69466800 | -3.44974600 |
| C | 5.98835000  | -0.12403500 | -1.34378100 | H  | -3.70386900 | -4.48622800 | -4.03264400 |
| H | 6.66831300  | -0.91735400 | -1.63387500 | C  | -3.42666100 | -2.35710000 | -3.80570700 |
| C | 6.14232400  | 1.14155300  | -1.89783200 | H  | -4.03414600 | -2.10156100 | -4.66990200 |
| C | 5.28767500  | 2.17415600  | -1.52215300 | C  | -2.83505100 | -1.34219000 | -3.05477500 |
| H | 5.43116400  | 3.16176700  | -1.94691600 | H  | -2.99662300 | -0.30817400 | -3.33973700 |
| C | 4.25985400  | 1.96189600  | -0.59509800 | H  | 3.87935600  | -1.93385500 | 0.58779500  |
| C | 3.40608900  | 3.13898900  | -0.12719600 | H  | 2.44671600  | 2.74081300  | 0.21693700  |
| C | -1.43271000 | -0.56634200 | -1.09325000 | H  | 0.54118600  | 2.44709200  | 1.93488900  |
| H | -1.22473600 | -0.94256900 | -0.08657700 | H  | 1.04188700  | -2.37627200 | 1.86837500  |
| C | -1.94663700 | 1.87199000  | -1.72307200 | C  | 0.19796500  | -0.25949200 | -2.81084900 |
| C | -0.78044000 | 2.60602700  | -1.46681000 | H  | -0.65330900 | 0.29242700  | -3.18611900 |
| H | -0.07039300 | 2.22466300  | -0.73981500 | H  | 0.20022900  | -1.30878900 | -3.08933800 |
| C | -0.53924100 | 3.80750100  | -2.13566500 | Br | 1.57088300  | -2.89246900 | -0.84089000 |
| H | 0.36562000  | 4.36619000  | -1.92156300 | C  | 1.46997700  | 0.45131200  | -2.94272300 |
| C | -1.46027700 | 4.30510700  | -3.05903600 | H  | 1.42292800  | 1.53828100  | -2.95333500 |
| H | -1.27037000 | 5.24363100  | -3.57160000 | C  | 2.66728800  | -0.16607800 | -3.05625900 |
| C | -2.62948800 | 3.58697000  | -3.30935400 | H  | 2.73893000  | -1.24814800 | -3.01140800 |
| H | -3.35965900 | 3.96132700  | -4.02145100 | H  | 3.58369900  | 0.40003200  | -3.18353400 |
| C | -2.86927800 | 2.38128500  | -2.65090800 | H  | 4.51445500  | 0.76895800  | 2.58128700  |
| H | -3.78804700 | 1.83681700  | -2.83562200 | H  | 2.23668000  | 0.35823700  | 4.11002100  |
| C | -5.53536900 | 1.04648300  | 0.54392400  | H  | -3.29975000 | -0.43757800 | 4.63704400  |
| C | -6.87732500 | 1.47040100  | -0.05076300 | H  | 6.93606400  | 1.32809500  | -2.61600800 |
| H | -6.94084300 | 2.56227400  | -0.07252100 | C  | -0.46572600 | -3.79440700 | 2.32805900  |
| H | -7.70895300 | 1.09495900  | 0.55490500  | H  | 0.17711700  | -4.58092900 | 1.92368900  |
| H | -6.99793200 | 1.10535800  | -1.07205100 | H  | -1.01313200 | -4.21356600 | 3.18059000  |
| C | -5.31457400 | 1.74037200  | 1.89345200  | H  | -1.19032600 | -3.52946300 | 1.55371900  |
| H | -4.35745200 | 1.44792100  | 2.33144700  | C  | 1.29782200  | -2.95531800 | 3.92719800  |
| H | -6.11252100 | 1.50509100  | 2.60460100  | H  | 0.69548600  | -3.17839600 | 4.81578700  |
| H | -5.30172000 | 2.82254400  | 1.73572700  | H  | 1.89290600  | -3.84371200 | 3.69056200  |
| C | -5.28739600 | -0.51344100 | 0.59344300  | H  | 1.99200100  | -2.15009700 | 4.18527100  |
| C | -5.59674600 | -1.17663900 | 1.93352600  | C  | 5.16626500  | -2.92398500 | -0.77814600 |
| H | -5.37531400 | -2.24601100 | 1.87192200  | H  | 6.20815300  | -2.94044200 | -1.11891600 |
| H | -6.65582600 | -1.06416100 | 2.18888900  | H  | 4.96445000  | -3.88412300 | -0.29447900 |
| H | -4.99251700 | -0.75428000 | 2.73725700  | H  | 4.50397600  | -2.85446800 | -1.64243800 |
| C | -5.98427400 | -1.27610900 | -0.54238300 | C  | 5.88210600  | -1.89903400 | 1.40827200  |
| H | -5.77800300 | -0.82146500 | -1.51502300 | H  | 6.91623900  | -1.75500900 | 1.07436900  |
| H | -7.06836800 | -1.31493900 | -0.39762600 | H  | 5.68020000  | -1.16378700 | 2.19224100  |
| H | -5.59944500 | -2.29877600 | -0.56844400 | H  | 5.81132700  | -2.89373200 | 1.86111400  |



|   |             |            |             |
|---|-------------|------------|-------------|
| C | -1.36598800 | 3.40296100 | 2.06848600  |
| H | -0.94993200 | 4.36157700 | 1.74096400  |
| H | -1.82880600 | 2.92358700 | 1.20294300  |
| H | -2.15424600 | 3.62524700 | 2.79558900  |
| C | 0.33975900  | 3.22071300 | 3.92596900  |
| H | -0.41529800 | 3.32357400 | 4.71311400  |
| H | 1.18122500  | 2.65832100 | 4.34059100  |
| H | 0.69829900  | 4.22430500 | 3.67217100  |
| C | 3.10772700  | 4.15515700 | -1.24220400 |
| H | 4.00435400  | 4.70491200 | -1.54689800 |
| H | 2.68934300  | 3.67390200 | -2.13064900 |
| H | 2.38918500  | 4.89851100 | -0.88189600 |
| C | 4.07363600  | 3.85970500 | 1.06463000  |
| H | 3.45073700  | 4.69410000 | 1.40571800  |
| H | 4.22732400  | 3.18848500 | 1.91326300  |
| H | 5.04924100  | 4.26412500 | 0.77302200  |

**L<sub>3</sub>-2I<sub>3</sub>**

|    |             |             |             |
|----|-------------|-------------|-------------|
| Cu | 0.00000600  | -0.00526000 | 1.44902900  |
| Br | 0.00000800  | -0.01256600 | 3.69100800  |
| C  | 0.00000000  | 0.00116800  | -0.44708400 |
| N  | 1.07667200  | 0.00420300  | -1.28780800 |
| N  | -1.07667500 | 0.00415600  | -1.28780400 |
| C  | 0.67851800  | 0.00882400  | -2.61970100 |
| C  | -0.67852600 | 0.00873300  | -2.61969800 |
| H  | 1.39034500  | 0.01155900  | -3.42941300 |
| H  | -1.39035600 | 0.01155100  | -3.42940800 |
| C  | -2.45766900 | 0.00285100  | -0.85800200 |
| C  | -3.10406600 | -1.23419900 | -0.66553600 |
| C  | -3.10424300 | 1.23877400  | -0.65894400 |
| C  | -4.44610200 | -1.20483200 | -0.26759400 |
| C  | -4.44631000 | 1.20713000  | -0.26129300 |
| C  | -5.11253900 | 0.00057900  | -0.06820300 |
| H  | -4.97233200 | -2.14059900 | -0.10587100 |
| H  | -4.97270300 | 2.14196900  | -0.09475500 |
| C  | 2.45766800  | 0.00291400  | -0.85801100 |
| C  | 3.10412300  | -1.23412900 | -0.66569200 |
| C  | 3.10418700  | 1.23884400  | -0.65881400 |
| C  | 4.44615700  | -1.20474300 | -0.26773600 |
| C  | 4.44625700  | 1.20721800  | -0.26117900 |
| C  | 5.11253900  | 0.00067400  | -0.06821600 |
| H  | 4.97243000  | -2.14050400 | -0.10612000 |
| H  | 4.97260700  | 2.14206200  | -0.09453500 |

|   |             |             |             |
|---|-------------|-------------|-------------|
| C | -2.40302400 | 2.58041500  | -0.84630600 |
| H | -1.36978700 | 2.38516500  | -1.14698200 |
| C | -2.40262700 | -2.57475600 | -0.85977800 |
| H | -1.37013500 | -2.37777200 | -1.16189200 |
| C | 2.40291500  | 2.58047200  | -0.84605500 |
| H | 1.36970800  | 2.38521500  | -1.14683400 |
| C | 2.40273500  | -2.57469900 | -0.86004600 |
| H | 1.37023800  | -2.37772300 | -1.16214700 |
| C | -3.05805400 | 3.40830400  | -1.96919600 |
| H | -3.05998700 | 2.86511100  | -2.92008300 |
| H | -4.09633200 | 3.66006500  | -1.72845800 |
| H | -2.51491600 | 4.34793100  | -2.11610500 |
| C | -2.34864400 | 3.37392700  | 0.47404200  |
| H | -3.35224400 | 3.63489000  | 0.82658100  |
| H | -1.85509700 | 2.79864500  | 1.26286000  |
| H | -1.79373600 | 4.30761500  | 0.33173500  |
| C | 2.34843300  | 3.37380900  | 0.47439600  |
| H | 1.85493500  | 2.79839900  | 1.26315100  |
| H | 3.35201600  | 3.63482700  | 0.82695200  |
| H | 1.79343900  | 4.30746200  | 0.33221200  |
| C | 3.05795400  | 3.40855400  | -1.96879900 |
| H | 4.09622300  | 3.66030700  | -1.72801600 |
| H | 3.05989400  | 2.86552000  | -2.91977600 |
| H | 2.51479100  | 4.34819500  | -2.11554600 |
| C | 3.05964000  | -3.39844700 | -1.98486300 |
| H | 3.06403200  | -2.85138500 | -2.93352000 |
| H | 4.09718600  | -3.65206700 | -1.74293800 |
| H | 2.51611100  | -4.33705400 | -2.13677100 |
| C | 2.34538200  | -3.37336300 | 0.45706800  |
| H | 3.34824100  | -3.63577200 | 0.81064700  |
| H | 1.85030500  | -2.80106700 | 1.24709700  |
| H | 1.79063900  | -4.30640700 | 0.30997800  |
| C | -2.34527500 | -3.37332000 | 0.45739700  |
| H | -1.85031300 | -2.80093900 | 1.24743700  |
| H | -3.34814200 | -3.63581900 | 0.81090000  |
| H | -1.79042700 | -4.30631600 | 0.31041800  |
| C | -3.05947500 | -3.39862600 | -1.98454000 |
| H | -4.09704000 | -3.65221400 | -1.74266000 |
| H | -3.06378500 | -2.85167900 | -2.93326200 |
| H | -2.51593900 | -4.33725800 | -2.13629100 |
| H | -6.15293300 | -0.00032900 | 0.24393300  |
| H | 6.15293300  | -0.00021200 | 0.24392000  |

**a-at 298K**

|   |             |             |             |
|---|-------------|-------------|-------------|
| C | 0.40144000  | 0.40506700  | -0.17067600 |
| N | -0.45621800 | -0.50277200 | 0.11412300  |
| C | -1.83173500 | -0.21421000 | 0.06745800  |
| C | -2.69492200 | -1.22832900 | -0.37957000 |
| C | -2.38097500 | 1.00868200  | 0.49263800  |
| C | -4.06753500 | -1.00781900 | -0.44692400 |
| H | -2.26236000 | -2.17685800 | -0.68114700 |
| C | -3.75840000 | 1.21601700  | 0.43947500  |
| H | -1.72966900 | 1.77781300  | 0.89668600  |
| C | -4.60636500 | 0.21531000  | -0.03831500 |
| H | -4.72125500 | -1.79625000 | -0.80876900 |
| H | -4.17142500 | 2.16085300  | 0.78157400  |
| H | -5.67885800 | 0.38054000  | -0.07631800 |
| C | 1.84967900  | 0.18169700  | -0.08297500 |
| C | 2.72859000  | 1.22004100  | -0.42687300 |
| C | 2.37775600  | -1.05126200 | 0.33858000  |
| C | 4.10826000  | 1.03513700  | -0.35195200 |
| H | 2.32437700  | 2.17503300  | -0.75391500 |
| C | 3.75385400  | -1.23420900 | 0.41081200  |
| H | 1.68811200  | -1.84626100 | 0.60132400  |
| C | 4.62307400  | -0.19243700 | 0.06683500  |
| H | 4.77956700  | 1.84554900  | -0.61993700 |
| H | 4.15562600  | -2.18929300 | 0.73655000  |
| H | 5.69759500  | -0.33953500 | 0.12566400  |
| H | 0.09548800  | 1.40570600  | -0.51167000 |

**b- at 298K**

|    |             |             |             |
|----|-------------|-------------|-------------|
| C  | 2.76408100  | -0.33578200 | -0.28882300 |
| H  | 2.86297300  | 0.03435600  | -1.30617400 |
| H  | 3.56583400  | -0.96655200 | 0.08161800  |
| C  | 1.71070700  | -0.02886900 | 0.46980000  |
| H  | 1.62903800  | -0.42103900 | 1.48138900  |
| C  | 0.60623400  | 0.85975000  | 0.02247700  |
| H  | 0.75255500  | 1.24406800  | -0.98587200 |
| H  | 0.40948200  | 1.67722000  | 0.71600900  |
| Br | -1.13445700 | -0.12967600 | -0.03450600 |

**LiOtBu- at 298K**

|   |             |             |             |
|---|-------------|-------------|-------------|
| O | 1.27085700  | -0.00031800 | -0.00064700 |
| C | -0.11642800 | 0.00001400  | 0.00003500  |

|    |             |             |             |
|----|-------------|-------------|-------------|
| C  | -0.63090900 | -1.12394400 | 0.92522200  |
| H  | -0.25833500 | -0.96687600 | 1.94337900  |
| H  | -1.72614700 | -1.16736900 | 0.96149800  |
| H  | -0.25914500 | -2.09293400 | 0.57444200  |
| C  | -0.63033500 | 1.36332900  | 0.51111700  |
| H  | -0.25752000 | 2.16634000  | -0.13411200 |
| H  | -1.72556400 | 1.41707100  | 0.53100000  |
| H  | -0.25813100 | 1.54393100  | 1.52551400  |
| C  | -0.63199100 | -0.23896100 | -1.43558200 |
| H  | -0.25973900 | -1.19923300 | -1.80896500 |
| H  | -1.72729100 | -0.24867000 | -1.49033600 |
| H  | -0.26067600 | 0.54931100  | -2.09959600 |
| Li | 2.87455800  | -0.00055300 | -0.00080200 |

**B<sub>2</sub>(pin)<sub>2</sub>- at 298K**

|   |             |             |             |
|---|-------------|-------------|-------------|
| B | 0.85316000  | -0.00022700 | -0.00030400 |
| O | 1.61574000  | -1.08126500 | -0.37271300 |
| O | 1.61538900  | 1.08102400  | 0.37224100  |
| C | 3.00462500  | 0.78754100  | 0.04605900  |
| C | 3.00479200  | -0.78750800 | -0.04599000 |
| C | 3.29226000  | -1.47938000 | 1.29329100  |
| H | 3.07495700  | -2.54618900 | 1.19361200  |
| H | 4.33916900  | -1.36643500 | 1.59047100  |
| H | 2.65953000  | -1.08004400 | 2.09055700  |
| C | 3.89178100  | -1.37819400 | -1.14029100 |
| H | 4.94563400  | -1.14045600 | -0.96069800 |
| H | 3.78710500  | -2.46673300 | -1.14684400 |
| H | 3.61451100  | -1.00858500 | -2.12893000 |
| C | 3.89110900  | 1.37845700  | 1.14066800  |
| H | 3.61355100  | 1.00886100  | 2.12922700  |
| H | 4.94507700  | 1.14091400  | 0.96148700  |
| H | 3.78621500  | 2.46697500  | 1.14712300  |
| C | 3.29243400  | 1.47940300  | -1.29314800 |
| H | 4.33949600  | 1.36675200  | -1.58989200 |
| H | 2.66015000  | 1.07977000  | -2.09062200 |
| H | 3.07475300  | 2.54615400  | -1.19367400 |
| B | -0.85317300 | -0.00020600 | -0.00031600 |
| C | -3.00462100 | 0.78754600  | 0.04638800  |
| O | -1.61541700 | 1.08085400  | 0.37275000  |
| C | -3.00480100 | -0.78750900 | -0.04634800 |
| O | -1.61574200 | -1.08108500 | -0.37317200 |
| C | -3.29241300 | 1.48009400  | -1.29245400 |
| H | -4.33947500 | 1.36766300  | -1.58926100 |

|   |             |             |             |   |            |            |             |
|---|-------------|-------------|-------------|---|------------|------------|-------------|
| H | -3.07465200 | 2.54677600  | -1.19240500 | C | 2.27577700 | 1.55961700 | 1.21959000  |
| H | -2.66011900 | 1.08088000  | -2.09012400 | H | 2.03812600 | 1.10689400 | 2.18367600  |
| C | -3.89111400 | 1.37793900  | 1.14129800  | H | 3.36387700 | 1.57311900 | 1.09789700  |
| H | -3.78611700 | 2.46644400  | 1.14833000  | H | 1.92569700 | 2.59578500 | 1.23783000  |
| H | -4.94509700 | 1.14057500  | 0.96198500  | C | 1.79989000 | 1.58591400 | -1.24517500 |
| H | -3.61359200 | 1.00777500  | 2.12965500  | H | 2.85876800 | 1.73067800 | -1.47905500 |
| C | -3.29228900 | -1.47999300 | 1.29259200  | H | 1.32875100 | 1.06544000 | -2.08366700 |
| H | -4.33920400 | -1.36724200 | 1.58979200  | H | 1.33200700 | 2.56972000 | -1.15021900 |
| H | -3.07490600 | -2.54674100 | 1.19244200  |   |            |            |             |
| H | -2.65957900 | -1.08099100 | 2.09003800  |   |            |            |             |
| C | -3.89176300 | -1.37774400 | -1.14095100 |   |            |            |             |
| H | -3.78684700 | -2.46625700 | -1.14810000 |   |            |            |             |
| H | -4.94565900 | -1.14031900 | -0.96120400 |   |            |            |             |
| H | -3.61460400 | -1.00752600 | -2.12938700 |   |            |            |             |

**tBuOB(pin)- at 298K**

|   |             |             |             |
|---|-------------|-------------|-------------|
| O | -1.56557800 | -0.83748400 | -0.31031900 |
| C | -2.73239400 | -0.03587100 | 0.00419800  |
| C | -3.92162700 | -0.93655200 | -0.34320200 |
| H | -3.89668700 | -1.20813000 | -1.40246000 |
| H | -3.88573400 | -1.85757500 | 0.24572000  |
| H | -4.86753200 | -0.42675100 | -0.13577300 |
| C | -2.74003900 | 1.23048700  | -0.86138500 |
| H | -3.65305700 | 1.80773200  | -0.68367400 |
| H | -1.87959600 | 1.86243700  | -0.63082300 |
| H | -2.70589900 | 0.96340000  | -1.92228600 |
| C | -2.73085800 | 0.30561800  | 1.50013200  |
| H | -3.64379300 | 0.84677800  | 1.76896200  |
| H | -2.69022200 | -0.61146200 | 2.09623200  |
| H | -1.87092200 | 0.92862500  | 1.75670700  |
| B | -0.27494600 | -0.45388900 | -0.17735500 |
| O | 0.75059600  | -1.29857200 | -0.54812400 |
| O | 0.17777500  | 0.75702800  | 0.32142400  |
| C | 1.60898700  | 0.81325100  | 0.06657600  |
| C | 1.98300200  | -0.71670400 | -0.05441300 |
| C | 2.27792000  | -1.37300300 | 1.30140400  |
| H | 2.31616300  | -2.45719700 | 1.16675500  |
| H | 3.23548200  | -1.04181500 | 1.71434100  |
| H | 1.49133200  | -1.15061300 | 2.02799700  |
| C | 3.10013000  | -1.03519800 | -1.04586600 |
| H | 4.03919700  | -0.55919200 | -0.74466500 |
| H | 3.26362900  | -2.11612500 | -1.07671300 |
| H | 2.84808400  | -0.70543100 | -2.05501000 |
